# Supplementary material for: High similarity in the microbiota of cold-water sponges of the Genus Mycale from two different geographical areas
Source: PeerJ. 2018 Jun 7;6:e4935. doi: 10.7717/peerj.4935 (PMC5994334; doi:10.7717/peerj.4935)
Supplement: File S1 — Relative abundance and taxonomy of 97% OTUs in samples of Mycale (Oxymycale) acerata and Mycale (Aegogropila) magellanica. [file peerj-06-4935-s003.xlsx]

## Sheet: Sheet1
Out number	taxonomy	sum	MM-MR2	MM-MR4	MA-Y1	MA-F1
Otu1	D_0__Bacteria; D_1__Proteobacteria; D_2__Alphaproteobacteria; D_3__SAR11 clade	30.7682	7.83072	6.48177	11.227	5.22873
Otu3	D_0__Bacteria; D_1__Proteobacteria; D_2__Alphaproteobacteria; D_3__Rhodobacterales; D_4__Rhodobacteraceae	29.1001	13.8633	8.38954	5.96707	0.880195
Otu4	D_0__Bacteria; D_1__Proteobacteria; D_2__Alphaproteobacteria; D_3__Rhodobacterales; D_4__Rhodobacteraceae	25.1111	11.1675	7.06935	5.34783	1.52647
Otu7	D_0__Bacteria; D_1__Proteobacteria; D_2__Alphaproteobacteria; D_3__SAR11 clade; D_4__Surface 1	22.7341	5.78027	4.51036	8.11847	4.32504
Otu21	D_0__Bacteria; D_1__Bacteroidetes; D_2__Flavobacteriia; D_3__Flavobacteriales; D_4__Flavobacteriaceae	14.2114	7.82656	5.66872	0.261258	0.454909
Otu23	D_0__Bacteria; D_1__Proteobacteria; D_2__Betaproteobacteria; D_3__Nitrosomonadales; D_4__Nitrosomonadaceae; D_5__Candidatus Branchiomonas; D_6__uncultured marine bacterium	14.0791	0.583341	1.27917	1.87933	10.3373
Otu10	D_0__Bacteria; D_1__Bacteroidetes; D_2__Flavobacteriia; D_3__Flavobacteriales; D_4__Flavobacteriaceae; Ambiguous_taxa; Ambiguous_taxa	13.7097	7.4442	5.24976	0.229215	0.786557
Otu43	D_0__Bacteria; D_1__Proteobacteria	13.6741	0.491609	1.03593	1.55969	10.5869
Otu12	D_0__Bacteria; D_1__Proteobacteria; D_2__Gammaproteobacteria; D_3__Enterobacteriales; D_4__Enterobacteriaceae; D_5__Buchnera	10.2	1.20735	0.163126	2.22551	6.60401
Otu25	D_0__Bacteria; D_1__Proteobacteria; D_2__Gammaproteobacteria; D_3__Enterobacteriales; D_4__Enterobacteriaceae; D_5__Buchnera	8.18563	0.865066	0.0778484	1.3289	5.91382
Otu9	D_0__Bacteria; D_1__Proteobacteria; D_2__Alphaproteobacteria; D_3__Rhodobacterales; D_4__Rhodobacteraceae; D_5__uncultured	6.94622	0.113106	0.154082	6.43081	0.248225
Otu15	D_0__Bacteria; D_1__Proteobacteria; D_2__Alphaproteobacteria; D_3__Rhodobacterales; D_4__Rhodobacteraceae	5.41323	0.14487	0.164741	4.83633	0.267293
Otu61	D_0__Bacteria; D_1__Proteobacteria; D_2__Gammaproteobacteria; D_3__Oceanospirillales; D_4__Oceanospirillaceae; D_5__Balneatrix; D_6__uncultured marine bacterium	4.64116	0.292709	0.19026	1.88228	2.27591
Otu51	D_0__Bacteria; D_1__Proteobacteria; D_2__Alphaproteobacteria; D_3__Rhodobacterales; D_4__Rhodobacteraceae; D_5__Planktomarina; Ambiguous_taxa	4.34266	1.06486	0.929336	0.526448	1.82202
Otu48	D_0__Bacteria; D_1__Bacteroidetes; D_2__Flavobacteriia; D_3__Flavobacteriales; D_4__Flavobacteriaceae; D_5__Polaribacter 1	4.24382	0.00920283	0.00969067	1.62043	2.60449
Otu36	D_0__Bacteria; D_1__Proteobacteria; D_2__Alphaproteobacteria; D_3__Rhizobiales; D_4__PS1 clade; Ambiguous_taxa; Ambiguous_taxa	3.72402	0.198009	0.234514	1.40478	1.88672
Otu40	D_0__Bacteria; D_1__Bacteroidetes; D_2__Flavobacteriia; D_3__Flavobacteriales; D_4__Flavobacteriaceae; D_5__Polaribacter 1	3.70861	0.0204837	0.0103367	1.01201	2.66578
Otu59	D_0__Bacteria; D_1__Actinobacteria; D_2__Acidimicrobiia; D_3__Acidimicrobiales; D_4__OM1 clade; D_5__Candidatus Actinomarina; D_6__uncultured bacterium	3.19403	2.23124	0.957762	0.00196583	0.00306451
Otu44	D_0__Bacteria; D_1__Bacteroidetes; D_2__Flavobacteriia; D_3__Flavobacteriales; D_4__Flavobacteriaceae; D_5__Ulvibacter	3.06705	0.201572	0.192844	1.7543	0.918331
Otu34	D_0__Bacteria; D_1__Proteobacteria; D_2__Alphaproteobacteria; D_3__Rhodobacterales; D_4__Rhodobacteraceae	2.99662	1.31304	0.767824	0.566748	0.349013
Otu95	D_0__Bacteria; D_1__Proteobacteria; D_2__Gammaproteobacteria; D_3__Oceanospirillales; D_4__Oceanospirillaceae; D_5__Balneatrix; D_6__uncultured marine bacterium	2.92389	0.172479	0.0826937	1.16711	1.50161
Otu56	D_0__Bacteria; D_1__Proteobacteria; D_2__Alphaproteobacteria; D_3__Rhodobacterales; D_4__Rhodobacteraceae; D_5__Planktomarina; Ambiguous_taxa	2.84136	0.559591	0.486795	0.40437	1.39061
Otu71	D_0__Bacteria; D_1__Actinobacteria; D_2__Acidimicrobiia; D_3__Acidimicrobiales; D_4__OM1 clade; D_5__Candidatus Actinomarina; Ambiguous_taxa	2.52536	1.79366	0.730677	0	0.0010215
Otu42	D_0__Bacteria; D_1__Proteobacteria; D_2__Alphaproteobacteria; D_3__Rhizobiales; D_4__PS1 clade	2.23226	0.0486859	0.0151821	0.726373	1.44202
Otu62	D_0__Bacteria; D_1__Bacteroidetes; D_2__Flavobacteriia; D_3__Flavobacteriales; D_4__Flavobacteriaceae; D_5__NS5 marine group	2.204	0.987968	0.631186	0.105761	0.479085
Otu50	D_0__Bacteria; D_1__Proteobacteria; D_2__Alphaproteobacteria; D_3__Rhodobacterales; D_4__Rhodobacteraceae; D_5__uncultured	2.18966	0.969859	0.57498	0.352669	0.29215
Otu37	D_0__Bacteria; D_1__Bacteroidetes; D_2__Flavobacteriia; D_3__Flavobacteriales; D_4__Flavobacteriaceae; D_5__Ulvibacter	2.16144	0.102122	0.0610512	1.21921	0.779066
Otu65	D_0__Bacteria; D_1__Bacteroidetes; D_2__Flavobacteriia; D_3__Flavobacteriales; D_4__Flavobacteriaceae; D_5__NS5 marine group	2.0997	0.898018	0.572073	0.126009	0.503601
Otu68	D_0__Bacteria; D_1__Bacteroidetes; D_2__Flavobacteriia; D_3__Flavobacteriales; D_4__Flavobacteriaceae; D_5__NS4 marine group	1.91748	0.610949	0.343373	0.0792228	0.88394
Otu54	D_0__Bacteria; D_1__Cyanobacteria; D_2__Cyanobacteria; D_3__SubsectionI; D_4__FamilyI; D_5__Prochlorococcus; D_6__uncultured bacterium	1.8881	1.11681	0.759749	0.0112052	0.000340501
Otu69	D_0__Bacteria; D_1__Cyanobacteria; D_2__Cyanobacteria; D_3__SubsectionI; D_4__FamilyI; D_5__Synechococcus	1.88692	1.10375	0.764917	0.01553	0.00272401
Otu75	D_0__Bacteria; D_1__Proteobacteria; D_2__Alphaproteobacteria; D_3__Sphingomonadales; D_4__Erythrobacteraceae; D_5__Altererythrobacter	1.79198	0.088169	0.932243	0.560457	0.211111
Otu89	D_0__Bacteria; D_1__Bacteroidetes; D_2__Flavobacteriia; D_3__Flavobacteriales; D_4__Flavobacteriaceae; D_5__Aquibacter	1.72188	0.0296865	0.086893	0.184394	1.42091
Otu104	D_0__Bacteria; D_1__Proteobacteria; D_2__Alphaproteobacteria; D_3__Rhizobiales; D_4__Phyllobacteriaceae	1.62263	0.0379988	0.151175	1.3405	0.0929567
Otu560	D_0__Bacteria; D_1__Bacteroidetes; D_2__Flavobacteriia; D_3__Flavobacteriales; D_4__Flavobacteriaceae; D_5__NS4 marine group; Ambiguous_taxa	1.55513	0.470829	0.268755	0.0906246	0.724926
Otu164	D_0__Bacteria; D_1__Bacteroidetes; D_2__Flavobacteriia; D_3__Flavobacteriales; D_4__NS9 marine group; Ambiguous_taxa; Ambiguous_taxa	1.49553	0.207806	0.146652	0.0715561	1.06951
Otu107	D_0__Bacteria; D_1__Bacteroidetes; D_2__Flavobacteriia; D_3__Flavobacteriales; D_4__Flavobacteriaceae; D_5__Aquibacter; D_6__uncultured bacterium	1.46284	0.0252336	0.0355325	0.174565	1.22751
Otu58	D_0__Bacteria; D_1__Actinobacteria; D_2__Actinobacteria; D_3__PeM15; Ambiguous_taxa; Ambiguous_taxa; Ambiguous_taxa	1.42207	0.55217	0.253573	0.42973	0.186594
Otu72	D_0__Bacteria; D_1__Proteobacteria; D_2__Alphaproteobacteria; D_3__Rhodobacterales; D_4__Rhodobacteraceae	1.39497	0.141605	0.334651	0.784561	0.134157
Otu103	D_0__Bacteria; D_1__Proteobacteria; D_2__Gammaproteobacteria; D_3__Alteromonadales; D_4__Alteromonadaceae; D_5__Glaciecola; D_6__uncultured Glaciecola sp.	1.34646	0.799755	0.448678	0.0442311	0.0537991
Otu77	D_0__Bacteria; D_1__Proteobacteria; D_2__Alphaproteobacteria; D_3__Rhodobacterales; D_4__Rhodobacteraceae; Ambiguous_taxa	1.31242	0.135667	0.316239	0.714774	0.145734
Otu94	D_0__Bacteria; D_1__Bacteroidetes; D_2__Flavobacteriia; D_3__Flavobacteriales; D_4__NS9 marine group; Ambiguous_taxa; Ambiguous_taxa	1.26255	0.132105	0.0565289	0.0353849	1.03853
Otu141	D_0__Bacteria; D_1__Actinobacteria; D_2__Acidimicrobiia; D_3__Acidimicrobiales; D_4__Acidimicrobiaceae; D_5__Ilumatobacter; Ambiguous_taxa	1.22028	0.101825	0.714849	0.31984	0.0837632
Otu70	D_0__Bacteria; D_1__Bacteroidetes; D_2__Flavobacteriia; D_3__Flavobacteriales; D_4__NS9 marine group; D_5__uncultured marine bacterium; D_6__uncultured marine bacterium	1.1647	0.784615	0.354356	0.0090428	0.0166845
Otu118	D_0__Bacteria; D_1__Proteobacteria; D_2__Alphaproteobacteria; D_3__Sphingomonadales; D_4__Erythrobacteraceae; D_5__Erythrobacter; D_6__uncultured bacterium	1.11303	0.0240461	0.644753	0.358763	0.0854657
Otu153	D_0__Bacteria; D_1__Bacteroidetes; D_2__Flavobacteriia; D_3__Flavobacteriales; D_4__Flavobacteriaceae; D_5__NS4 marine group	1.1117	0.515061	0.320761	0.0259489	0.249928
Otu66	D_0__Bacteria; D_1__Actinobacteria; D_2__Acidimicrobiia; D_3__Acidimicrobiales; D_4__Sva0996 marine group; Ambiguous_taxa; Ambiguous_taxa	1.08826	0.116668	0.312686	0.545517	0.113387
Otu91	D_0__Bacteria; D_1__Actinobacteria; D_2__Actinobacteria; D_3__PeM15; Ambiguous_taxa; Ambiguous_taxa; Ambiguous_taxa	0.991483	0.3883	0.160219	0.292122	0.150842
Otu106	D_0__Bacteria; D_1__Actinobacteria; D_2__Acidimicrobiia; D_3__Acidimicrobiales; D_4__Sva0996 marine group; Ambiguous_taxa; Ambiguous_taxa	0.979204	0.127355	0.323992	0.426388	0.101469
Otu187	D_0__Bacteria; D_1__Proteobacteria; D_2__Gammaproteobacteria; D_3__Oceanospirillales; D_4__Hahellaceae; D_5__Endozoicomonas	0.95256	0.0558107	0.0268109	0.0530773	0.816862
Otu145	D_0__Bacteria; D_1__Bacteroidetes; D_2__Flavobacteriia; D_3__Flavobacteriales; D_4__NS9 marine group	0.919857	0.634104	0.271016	0.0045214	0.010215
Otu168	D_0__Bacteria; D_1__Proteobacteria; D_2__Alphaproteobacteria; D_3__Rickettsiales; D_4__SAR116 clade; D_5__uncultured bacterium; D_6__uncultured bacterium	0.893724	0.314974	0.241944	0.0715561	0.26525
Otu295	D_0__Bacteria; D_1__Proteobacteria; D_2__Gammaproteobacteria; D_3__Alteromonadales; D_4__Alteromonadaceae	0.889737	0.561966	0.318823	0.0045214	0.00442651
Otu368	D_0__Bacteria; D_1__Bacteroidetes; D_2__Flavobacteriia; D_3__Flavobacteriales; D_4__Flavobacteriaceae; D_5__Formosa	0.862958	0.429861	0.296535	0.0115984	0.124964
Otu132	D_0__Bacteria; D_1__Proteobacteria; D_2__Alphaproteobacteria; D_3__Rickettsiales; D_4__SAR116 clade; D_5__uncultured bacterium; D_6__uncultured bacterium	0.813904	0.275194	0.218363	0.0935733	0.226774
Otu405	D_0__Bacteria; D_1__Bacteroidetes; D_2__Flavobacteriia; D_3__Flavobacteriales; D_4__Flavobacteriaceae	0.811151	0.162385	0.110151	0.0847271	0.453888
Otu234	D_0__Bacteria; D_1__Proteobacteria; D_2__Betaproteobacteria; D_3__Methylophilales; D_4__Methylophilaceae; D_5__OM43 clade; D_6__uncultured marine bacterium	0.805241	0.278163	0.133731	0.0780433	0.315304
Otu129	D_0__Bacteria; D_1__Proteobacteria; D_2__Gammaproteobacteria; D_3__Oceanospirillales; D_4__Hahellaceae; D_5__Endozoicomonas	0.789804	0.0255304	0.000969067	0.00943597	0.753869
Otu432	D_0__Bacteria; D_1__Proteobacteria; D_2__Gammaproteobacteria; D_3__Alteromonadales; D_4__Colwelliaceae; D_5__Colwellia; D_6__uncultured bacterium	0.760199	0.115481	0.449647	0.115394	0.0796772
Otu154	D_0__Bacteria; D_1__Actinobacteria; D_2__Acidimicrobiia; D_3__Acidimicrobiales; D_4__Acidimicrobiaceae; D_5__Ilumatobacter	0.757674	0.0739195	0.446417	0.195796	0.0415411
Otu109	D_0__Bacteria; D_1__Proteobacteria; D_2__Alphaproteobacteria; D_3__Rickettsiales; D_4__Rickettsiales Incertae Sedis; D_5__Candidatus Hepatincola; D_6__uncultured bacterium	0.74586	0.0228586	0.674148	0.0253592	0.0234946
Otu170	D_0__Bacteria; D_1__Bacteroidetes; D_2__Flavobacteriia; D_3__Flavobacteriales; D_4__Flavobacteriaceae	0.714079	0.0436392	0.521358	0.0656586	0.0834227
Otu174	D_0__Bacteria; D_1__Bacteroidetes; D_2__Flavobacteriia; D_3__Flavobacteriales; D_4__Flavobacteriaceae	0.695632	0.0391862	0.483888	0.0782399	0.0943187
Otu163	D_0__Bacteria; D_1__Bacteroidetes; D_2__Flavobacteriia; D_3__Flavobacteriales; D_4__Cryomorphaceae; D_5__uncultured; Ambiguous_taxa	0.688756	0.111325	0.0613743	0.0574021	0.458655
Otu85	D_0__Bacteria; D_1__Proteobacteria; D_2__Gammaproteobacteria	0.688675	0.0712477	0.0613743	0.481824	0.0742292
Otu143	D_0__Bacteria; D_1__Proteobacteria; D_2__Alphaproteobacteria; D_3__Emcibacterales; D_4__Emcibacteraceae; D_5__Emcibacter; D_6__uncultured bacterium	0.682025	0.127058	0.296212	0.111659	0.147096
Otu120	D_0__Bacteria; D_1__Bacteroidetes; D_2__Flavobacteriia; D_3__Flavobacteriales; D_4__Cryomorphaceae; D_5__uncultured; Ambiguous_taxa	0.674667	0.104497	0.057498	0.049932	0.462741
Otu122	D_0__Bacteria; D_1__Bacteroidetes; D_2__Flavobacteriia; D_3__Flavobacteriales; D_4__Cryomorphaceae; D_5__uncultured; D_6__uncultured marine bacterium	0.673802	0.0932157	0.0642815	0.0198548	0.49645
Otu171	D_0__Bacteria; D_1__Proteobacteria; D_2__Gammaproteobacteria; D_3__Alteromonadales; D_4__Pseudoalteromonadaceae; D_5__Pseudoalteromonas	0.6704	0.046311	0.0277799	0.589158	0.00715052
Otu136	D_0__Bacteria; D_1__Bacteroidetes; D_2__Flavobacteriia; D_3__Flavobacteriales; D_4__Cryomorphaceae; D_5__uncultured; D_6__uncultured marine bacterium	0.644806	0.103606	0.0616973	0.0171027	0.4624
Otu159	D_0__Bacteria; D_1__Bacteroidetes; D_2__Flavobacteriia; D_3__Flavobacteriales; D_4__Flavobacteriaceae	0.622384	0.00534358	0.10369	0.0448208	0.468529
Otu244	D_0__Bacteria; D_1__Bacteroidetes; D_2__Flavobacteriia; D_3__Flavobacteriales; D_4__Cryomorphaceae; D_5__uncultured; D_6__uncultured Flavobacterium sp.	0.619855	0.382956	0.221593	0.0125813	0.00272401
Otu314	D_0__Bacteria; D_1__Proteobacteria; D_2__Betaproteobacteria; D_3__Methylophilales; D_4__Methylophilaceae; D_5__OM43 clade; D_6__uncultured marine bacterium	0.605844	0.213446	0.107243	0.0342054	0.250949
Otu338	D_0__Bacteria; D_1__Proteobacteria; D_2__Alphaproteobacteria; D_3__Rhodobacterales; D_4__Rhodobacteraceae; D_5__uncultured; D_6__uncultured bacterium	0.600433	0.314974	0.225793	0.0361712	0.0234946
Otu126	D_0__Bacteria; D_1__Proteobacteria; D_2__Alphaproteobacteria; D_3__Rickettsiales; D_4__Rickettsiales Incertae Sedis; D_5__Candidatus Hepatincola	0.588674	0.0160307	0.549784	0.00923938	0.01362
Otu631	D_0__Bacteria; D_1__Bacteroidetes; D_2__Flavobacteriia; D_3__Flavobacteriales; D_4__Flavobacteriaceae; D_5__Ulvibacter	0.563802	0.00949969	0.317531	0.135642	0.101129
Otu210	D_0__Bacteria; D_1__Bacteroidetes; D_2__Flavobacteriia; D_3__Flavobacteriales; D_4__Flavobacteriaceae	0.563176	0.00415612	0.0956146	0.0316498	0.431755
Otu225	D_0__Bacteria; D_1__Bacteroidetes; D_2__Flavobacteriia; D_3__Flavobacteriales; D_4__Flavobacteriaceae; D_5__NS5 marine group	0.549521	0.0558107	0.0749412	0.080992	0.337777
Otu160	D_0__Bacteria; D_1__Proteobacteria; D_2__Gammaproteobacteria; D_3__Cellvibrionales	0.547765	0.0284991	0.0213195	0.189112	0.308834
Otu240	D_0__Bacteria; D_1__Chloroflexi; D_2__Anaerolineae; D_3__Anaerolineales; D_4__Anaerolineaceae; D_5__uncultured; D_6__uncultured bacterium	0.547196	0.0100934	0.524588	0.010812	0.0017025
Otu198	D_0__Bacteria; D_1__Bacteroidetes; D_2__Flavobacteriia; D_3__Flavobacteriales; D_4__Flavobacteriaceae	0.546272	0.158229	0.0936765	0.0597611	0.234605
Otu2959	D_0__Bacteria; D_1__Proteobacteria; D_2__Alphaproteobacteria; D_3__Rhodobacterales; D_4__Rhodobacteraceae	0.538325	0.0187025	0.0830168	0.41243	0.0241756
Otu1265	D_0__Bacteria; D_1__Proteobacteria; D_2__Alphaproteobacteria; D_3__SAR11 clade; D_4__Surface 4; D_5__uncultured alpha proteobacterium; D_6__uncultured alpha proteobacterium	0.5333	0.24343	0.140515	0.0829579	0.0663977
Otu3216	D_0__Bacteria; D_1__Proteobacteria; D_2__Alphaproteobacteria; D_3__SAR11 clade; D_4__Surface 1	0.532023	0.147542	0.102721	0.158839	0.122921
Otu178	D_0__Bacteria; D_1__Proteobacteria; D_2__Alphaproteobacteria; D_3__Rhodobacterales; D_4__Rhodobacteraceae; D_5__Roseobacter clade CHAB-I-5 lineage; Ambiguous_taxa	0.5293	0.0139527	0.189291	0.29507	0.0309856
Otu1734	D_0__Bacteria; D_1__Proteobacteria; D_2__Alphaproteobacteria; D_3__SAR11 clade	0.526752	0.122902	0.141807	0.204839	0.0572041
Otu121	D_0__Bacteria; D_1__Proteobacteria; D_2__Alphaproteobacteria; D_3__Rhodobacterales; D_4__Rhodobacteraceae; D_5__uncultured; Ambiguous_taxa	0.525358	0.0457173	0.163126	0.26578	0.0507346
Otu3696	D_0__Bacteria; D_1__Proteobacteria; D_2__Gammaproteobacteria; D_3__Oceanospirillales; D_4__Oceanospirillaceae; D_5__Balneatrix; D_6__uncultured marine bacterium	0.519946	0.0086091	0.00516836	0.0750946	0.431074
Otu182	D_0__Bacteria; D_1__Actinobacteria; D_2__Acidimicrobiia; D_3__Acidimicrobiales; D_4__Acidimicrobiaceae; D_5__Ilumatobacter; Ambiguous_taxa	0.518807	0.0920283	0.269724	0.136625	0.0204301
Otu1272	D_0__Bacteria; D_1__Proteobacteria; D_2__Alphaproteobacteria; D_3__Rhodobacterales; D_4__Rhodobacteraceae; D_5__Halocynthiibacter	0.518744	0.1042	0.11112	0.274822	0.0286021
Otu148	D_0__Bacteria; D_1__Proteobacteria; D_2__Alphaproteobacteria; D_3__Rhizobiales; D_4__Phyllobacteriaceae; D_5__uncultured	0.518066	0.00949969	0.385043	0.0921972	0.0313261
Otu299	D_0__Bacteria; D_1__Proteobacteria; D_2__Gammaproteobacteria; D_3__Cellvibrionales; D_4__Cellvibrionaceae	0.515749	0.0103903	0.00355325	0.21919	0.282616
Otu261	D_0__Bacteria; D_1__Proteobacteria; D_2__Alphaproteobacteria; D_3__Rhodobacterales; D_4__Rhodobacteraceae; D_5__Octadecabacter	0.511874	0.066201	0.0565289	0.337729	0.0514156
Otu162	D_0__Bacteria; D_1__Proteobacteria; D_2__Alphaproteobacteria; D_3__Rhizobiales; D_4__Phyllobacteriaceae	0.511556	0.00979656	0.057498	0.404764	0.0394981
Otu395	D_0__Bacteria; D_1__Proteobacteria; D_2__Gammaproteobacteria; D_3__Alteromonadales; D_4__Colwelliaceae; D_5__Colwellia; D_6__uncultured bacterium	0.509746	0.0537326	0.309456	0.0709663	0.0755912
Otu611	D_0__Bacteria; D_1__Proteobacteria; D_2__Alphaproteobacteria; D_3__Rhodobacterales; D_4__Rhodobacteraceae	0.508071	0.0477953	0.101429	0.328883	0.0299641
Otu190	D_0__Bacteria; D_1__Proteobacteria; D_2__Alphaproteobacteria; D_3__Emcibacterales; D_4__Emcibacteraceae; D_5__Emcibacter; D_6__uncultured alpha proteobacterium	0.499587	0.0745132	0.216102	0.08571	0.123261
Otu147	D_0__Bacteria; D_1__Proteobacteria; D_2__Gammaproteobacteria; D_3__Cellvibrionales; D_4__Halieaceae; D_5__OM60(NOR5) clade; D_6__uncultured marine bacterium	0.497411	0.021968	0.0739721	0.249267	0.152204
Otu320	D_0__Bacteria; D_1__Proteobacteria; D_2__Gammaproteobacteria; D_3__Xanthomonadales; D_4__JTB255 marine benthic group	0.488681	0.0163276	0.405716	0.0424618	0.0241756
Otu268	D_0__Bacteria; D_1__Proteobacteria; D_2__Gammaproteobacteria	0.480621	0.263023	0.187676	0.0149403	0.014982
Otu288	D_0__Bacteria; D_1__Bacteroidetes; D_2__Flavobacteriia; D_3__Flavobacteriales; D_4__Flavobacteriaceae; D_5__Ulvibacter; Ambiguous_taxa	0.476422	0.00801537	0.253573	0.11677	0.0980643
Otu117	D_0__Bacteria; D_1__Proteobacteria; D_2__Alphaproteobacteria; D_3__Rhodobacterales; D_4__Rhodobacteraceae; D_5__uncultured	0.464267	0.0118746	0.137608	0.301165	0.01362
Otu246	D_0__Bacteria; D_1__Bacteroidetes; D_2__Flavobacteriia; D_3__Flavobacteriales; D_4__Flavobacteriaceae; D_5__uncultured; Ambiguous_taxa	0.454816	0.138339	0.104013	0.0418721	0.170591
Otu158	D_0__Bacteria; D_1__Bacteroidetes; D_2__Flavobacteriia; D_3__Flavobacteriales; D_4__Flavobacteriaceae; D_5__NS5 marine group	0.448714	0.123496	0.0946456	0.0194617	0.211111
Otu186	D_0__Bacteria; D_1__Bacteroidetes; D_2__Flavobacteriia; D_3__Flavobacteriales; D_4__Flavobacteriaceae; D_5__uncultured	0.438959	0.00949969	0.28103	0.125616	0.0228136
Otu264	D_0__Bacteria; D_1__Bacteroidetes; D_2__Flavobacteriia; D_3__Flavobacteriales; D_4__Flavobacteriaceae; D_5__uncultured; Ambiguous_taxa	0.436461	0.142792	0.100137	0.0314532	0.162078
Otu169	D_0__Bacteria; D_1__Firmicutes; D_2__Clostridia; D_3__Clostridiales; D_4__Family XI; D_5__Tissierella	0.426055	0.000593731	0.000646045	0.424815	0
Otu181	D_0__Bacteria; D_1__Bacteroidetes; D_2__Flavobacteriia; D_3__Flavobacteriales; D_4__Flavobacteriaceae; D_5__NS5 marine group; Ambiguous_taxa	0.418835	0.273413	0.137285	0.00609406	0.00204301
Otu144	D_0__Bacteria; D_1__Proteobacteria; D_2__Deltaproteobacteria; D_3__SAR324 clade(Marine group B); D_4__uncultured bacterium; D_5__uncultured bacterium; D_6__uncultured bacterium	0.416953	0.175151	0.236129	0.00294874	0.00272401
Otu294	D_0__Bacteria; D_1__Proteobacteria; D_2__Gammaproteobacteria; D_3__Cellvibrionales; D_4__Porticoccaceae; D_5__SAR92 clade; D_6__uncultured marine bacterium	0.410959	0.0175151	0.0167972	0.0194617	0.357185
Otu574	Unassigned	0.394983	0.0635292	0.0665426	0.185574	0.0793367
Otu3926	D_0__Bacteria; D_1__Proteobacteria; D_2__Gammaproteobacteria; D_3__Oceanospirillales; D_4__Oceanospirillaceae; D_5__Balneatrix; D_6__uncultured marine bacterium	0.391212	0.259757	0.125979	0.00275216	0.00272401
Otu152	D_0__Bacteria; D_1__Bacteroidetes; D_2__Flavobacteriia; D_3__Flavobacteriales; D_4__Flavobacteriaceae	0.388731	0.144573	0.110151	0.0090428	0.124964
Otu739	D_0__Bacteria; D_1__Proteobacteria; D_2__Gammaproteobacteria; D_3__Cellvibrionales; D_4__Porticoccaceae; D_5__SAR92 clade; D_6__uncultured marine bacterium	0.380118	0.0270148	0.0135669	0.0245728	0.314963
Otu916	D_0__Bacteria; D_1__Bacteroidetes; D_2__Flavobacteriia; D_3__Flavobacteriales; D_4__Flavobacteriaceae; D_5__NS4 marine group	0.377342	0.167432	0.0898002	0.0057009	0.114408
Otu280	D_0__Bacteria; D_1__Chloroflexi; D_2__Anaerolineae; D_3__Anaerolineales; D_4__Anaerolineaceae; D_5__uncultured	0.374694	0.00712477	0.271985	0.08571	0.00987453
Otu146	D_0__Bacteria; D_1__Proteobacteria; D_2__Alphaproteobacteria; D_3__Rhodobacterales; D_4__Rhodobacteraceae; D_5__Octadecabacter	0.374467	0.0483891	0.057175	0.238258	0.0306451
Otu757	D_0__Bacteria; D_1__Proteobacteria; D_2__Gammaproteobacteria; D_3__Cellvibrionales; D_4__Halieaceae	0.373502	0.0145464	0.0629894	0.173386	0.12258
Otu155	D_0__Bacteria; D_1__Bacteroidetes; D_2__Flavobacteriia; D_3__Flavobacteriales; D_4__Flavobacteriaceae; D_5__uncultured	0.370518	0.00296865	0.244851	0.0923938	0.0303046
Otu199	D_0__Bacteria; D_1__Actinobacteria; D_2__Actinobacteria; D_3__Micrococcales; D_4__Microbacteriaceae; D_5__Candidatus Aquiluna	0.369216	0.124683	0.0639584	0.153334	0.0272401
Otu276	D_0__Bacteria; D_1__Chloroflexi; D_2__Anaerolineae; D_3__Anaerolineales; D_4__Anaerolineaceae; D_5__uncultured; D_6__uncultured bacterium	0.368558	0.00534358	0.346926	0.0135642	0.00272401
Otu167	D_0__Bacteria; D_1__Proteobacteria; D_2__Alphaproteobacteria; D_3__Rhizobiales; D_4__Phyllobacteriaceae; D_5__uncultured	0.364822	0.00118746	0.274246	0.0839408	0.00544801
Otu3737	D_0__Bacteria; D_1__Proteobacteria; D_2__Gammaproteobacteria; D_3__Alteromonadales; D_4__Shewanellaceae; D_5__Shewanella	0.363138	0.241055	0.115965	0.00373507	0.00238351
Otu851	D_0__Bacteria; D_1__Bacteroidetes; D_2__Flavobacteriia; D_3__Flavobacteriales; D_4__Flavobacteriaceae	0.360976	0.13448	0.167649	0.0275216	0.0313261
Otu543	D_0__Bacteria; D_1__Proteobacteria; D_2__Gammaproteobacteria; D_3__Xanthomonadales; D_4__JTB255 marine benthic group	0.354602	0.0100934	0.284583	0.0330259	0.0268996
Otu213	D_0__Bacteria; D_1__Spirochaetae; D_2__Spirochaetes; D_3__Spirochaetales; D_4__Spirochaetaceae; D_5__Spirochaeta 2; D_6__uncultured marine bacterium	0.347636	0.244617	0.101106	0.00157266	0.000340501
Otu219	D_0__Bacteria; D_1__Firmicutes; D_2__Clostridia; D_3__Clostridiales; D_4__Family XI; D_5__uncultured; D_6__uncultured bacterium	0.344216	0	0	0.344216	0
Otu156	D_0__Bacteria; D_1__Proteobacteria; D_2__Alphaproteobacteria; D_3__Rhodobacterales; D_4__Rhodobacteraceae	0.343593	0.00890596	0.113704	0.199531	0.0214516
Otu3326	D_0__Bacteria; D_1__Proteobacteria; D_2__Alphaproteobacteria; D_3__Rhodobacterales; D_4__Rhodobacteraceae; D_5__uncultured; D_6__uncultured bacterium	0.340254	0.184057	0.130501	0.020248	0.00544801
Otu229	Unassigned	0.335957	0.021968	0.0203504	0.0123847	0.281254
Otu150	D_0__Bacteria; D_1__Proteobacteria; D_2__Proteobacteria Incertae Sedis; D_3__Unknown Order; D_4__Unknown Family; D_5__Candidatus Tenderia	0.335389	0.00267179	0.043285	0.266959	0.0224731
Otu203	D_0__Bacteria; D_1__Proteobacteria; D_2__Gammaproteobacteria; D_3__Oceanospirillales	0.331969	0.191478	0.0122749	0.0611372	0.0670787
Otu691	D_0__Bacteria; D_1__Bacteroidetes; D_2__Flavobacteriia; D_3__Flavobacteriales; D_4__Cryomorphaceae; D_5__Fluviicola; D_6__uncultured bacterium	0.327177	0.170104	0.10789	0.0100257	0.0391576
Otu128	D_0__Bacteria; D_1__Firmicutes; D_2__Clostridia; D_3__Clostridiales; D_4__Family XI; D_5__Gottschalkia; D_6__uncultured bacterium	0.326617	0.00742163	0.00549138	0.309618	0.00408601
Otu228	D_0__Bacteria; D_1__Proteobacteria; D_2__Gammaproteobacteria; D_3__Oceanospirillales; D_4__Oceanospirillaceae; D_5__Pseudohongiella	0.323985	0.186431	0.130178	0.00294874	0.00442651
Otu253	D_0__Bacteria; D_1__Proteobacteria; D_2__Gammaproteobacteria; D_3__Cellvibrionales	0.321228	0.250258	0.00839858	0.0159232	0.0466486
Otu3739	D_0__Bacteria; D_1__Proteobacteria; D_2__Alphaproteobacteria; D_3__Rhizobiales; D_4__Phyllobacteriaceae	0.318246	0.00385925	0.0271339	0.277378	0.00987453
Otu140	D_0__Bacteria; D_1__Proteobacteria; D_2__Proteobacteria Incertae Sedis; D_3__Unknown Order; D_4__Unknown Family; D_5__Candidatus Tenderia	0.31747	0.00178119	0.0132439	0.278951	0.0234946
Otu340	D_0__Bacteria; D_1__Proteobacteria; D_2__Gammaproteobacteria; D_3__Oceanospirillales; D_4__SAR86 clade; D_5__uncultured marine bacterium; D_6__uncultured marine bacterium	0.31744	0.173666	0.0704189	0.00491457	0.0684407
Otu3767	Unassigned	0.311958	0.149026	0.0888312	0.0587782	0.0153225
Otu517	D_0__Bacteria; D_1__Bacteroidetes; D_2__Flavobacteriia; D_3__Flavobacteriales; D_4__NS9 marine group	0.30693	0.15437	0.085924	0.00432482	0.0623117
Otu850	D_0__Bacteria; D_1__Proteobacteria; D_2__Alphaproteobacteria; D_3__Rhodobacterales; D_4__Rhodobacteraceae	0.306293	0.0231555	0.0458692	0.227053	0.010215
Otu157	D_0__Bacteria; D_1__Bacteroidetes; D_2__Flavobacteriia; D_3__Flavobacteriales; D_4__Cryomorphaceae; D_5__uncultured	0.305515	0.0106872	0.00775254	0.212506	0.0745697
Otu464	D_0__Bacteria; D_1__Proteobacteria; D_2__Gammaproteobacteria; D_3__Alteromonadales; D_4__Psychromonadaceae; D_5__Psychromonas	0.305289	0.140417	0.0665426	0.0782399	0.0200896
Otu2773	D_0__Bacteria; D_1__Bacteroidetes; D_2__Flavobacteriia; D_3__Flavobacteriales; D_4__Flavobacteriaceae; Ambiguous_taxa; Ambiguous_taxa	0.29771	0.103309	0.104336	0.0216241	0.0684407
Otu914	D_0__Bacteria; D_1__Proteobacteria; D_2__Gammaproteobacteria; D_3__Enterobacteriales; D_4__Enterobacteriaceae; D_5__Buchnera	0.295408	0.0302803	0	0.0308635	0.234265
Otu326	D_0__Bacteria; D_1__Bacteroidetes; D_2__Flavobacteriia; D_3__Flavobacteriales; D_4__Flavobacteriaceae; D_5__Postechiella	0.291641	0.169807	0.115965	0.00314532	0.00272401
Otu523	D_0__Bacteria; D_1__Proteobacteria; D_2__Gammaproteobacteria; D_3__Oceanospirillales; D_4__SAR86 clade; D_5__uncultured bacterium; D_6__uncultured bacterium	0.289432	0.146948	0.0759103	0.00766672	0.0589067
Otu333	D_0__Bacteria; D_1__Proteobacteria; D_2__Epsilonproteobacteria; D_3__Campylobacterales; D_4__Campylobacteraceae; D_5__Arcobacter; D_6__uncultured Epsilonproteobacteria bacterium	0.284828	0.127652	0.0820477	0.0308635	0.0442651
Otu267	D_0__Bacteria; D_1__Actinobacteria; D_2__Acidimicrobiia; D_3__Acidimicrobiales; D_4__Sva0996 marine group	0.284764	0.0189994	0.193813	0.0198548	0.0520966
Otu302	D_0__Bacteria; D_1__Proteobacteria; D_2__Betaproteobacteria; D_3__Methylophilales; D_4__Methylophilaceae; D_5__Methylotenera	0.281385	0.000296865	0.0542678	0.175745	0.0510751
Otu431	D_0__Bacteria; D_1__Proteobacteria; D_2__Gammaproteobacteria; D_3__Alteromonadales; D_4__Psychromonadaceae; D_5__Psychromonas	0.27678	0.147245	0.0930305	0.0259489	0.0105555
Otu231	D_0__Bacteria; D_1__Actinobacteria; D_2__Acidimicrobiia; D_3__Acidimicrobiales; D_4__Sva0996 marine group	0.274817	0.0284991	0.177339	0.0192651	0.0497131
Otu1366	D_0__Bacteria; D_1__Proteobacteria; D_2__Gammaproteobacteria; D_3__Alteromonadales; D_4__Psychromonadaceae; D_5__Psychromonas; Ambiguous_taxa	0.274402	0.145167	0.101429	0.0220173	0.00578851
Otu270	D_0__Bacteria; D_1__Proteobacteria; D_2__Alphaproteobacteria; D_3__Rhodospirillales; D_4__Rhodospirillaceae; D_5__uncultured	0.274215	0.0667947	0.111443	0.0861032	0.00987453
Otu4388	D_0__Bacteria; D_1__Bacteroidetes; D_2__Flavobacteriia; D_3__Flavobacteriales; D_4__Flavobacteriaceae	0.272518	0.107465	0.0985218	0.00353849	0.0629927
Otu214	D_0__Bacteria; D_1__Nitrospinae; D_2__Nitrospinia; D_3__Nitrospinales; D_4__Nitrospinaceae; D_5__uncultured; Ambiguous_taxa	0.27188	0.0302803	0.106597	0.101633	0.0333691
Otu1379	D_0__Bacteria; D_1__Bacteroidetes; D_2__Flavobacteriia; D_3__Flavobacteriales; D_4__Flavobacteriaceae; D_5__Formosa; D_6__uncultured marine bacterium	0.269596	0.148136	0.0904463	0.00275216	0.0282616
Otu2613	D_0__Bacteria; D_1__Proteobacteria; D_2__Alphaproteobacteria; D_3__Rhodobacterales; D_4__Rhodobacteraceae; D_5__Planktomarina	0.268712	0.142792	0.112089	0.00157266	0.012258
Otu453	D_0__Bacteria; D_1__Actinobacteria; D_2__Acidimicrobiia; D_3__Acidimicrobiales; D_4__Acidimicrobiaceae; D_5__Ilumatobacter; Ambiguous_taxa	0.266905	0.0519514	0.161188	0.0442311	0.00953402
Otu224	D_0__Bacteria; D_1__Bacteroidetes; D_2__Flavobacteriia; D_3__Flavobacteriales; D_4__Flavobacteriaceae	0.263072	0.157932	0.104013	0.00078633	0.000340501
Otu402	D_0__Bacteria; D_1__Chloroflexi; D_2__Anaerolineae; D_3__Anaerolineales; D_4__Anaerolineaceae; D_5__uncultured	0.263026	0.00385925	0.195752	0.0603509	0.00306451
Otu562	D_0__Bacteria; D_1__Bacteroidetes; D_2__Flavobacteriia; D_3__Flavobacteriales; D_4__NS7 marine group	0.262673	0.0480922	0.0410239	0.00943597	0.164121
Otu194	D_0__Bacteria; D_1__Proteobacteria; D_2__Alphaproteobacteria; D_3__Caulobacterales; D_4__Hyphomonadaceae; D_5__Litorimonas; Ambiguous_taxa	0.260479	0.0184057	0.0377936	0.154907	0.0493726
Otu521	D_0__Bacteria; D_1__Spirochaetae; D_2__Spirochaetes; D_3__Spirochaetales; D_4__Spirochaetaceae; D_5__Spirochaeta 2; D_6__uncultured marine bacterium	0.259812	0.185838	0.0671887	0.00235899	0.00442651
Otu743	D_0__Bacteria; D_1__Actinobacteria; D_2__Actinobacteria; D_3__Micrococcales; D_4__Microbacteriaceae	0.258855	0.00415612	0.0103367	0.240617	0.00374551
Otu455	D_0__Bacteria; D_1__Proteobacteria; D_2__Deltaproteobacteria; D_3__SAR324 clade(Marine group B); D_4__uncultured bacterium; D_5__uncultured bacterium; D_6__uncultured bacterium	0.258541	0.113403	0.143422	0.00137608	0.000340501
Otu298	D_0__Bacteria; D_1__Bacteroidetes; D_2__Flavobacteriia; D_3__Flavobacteriales; D_4__Flavobacteriaceae	0.257118	0.000593731	0.000323022	0.0379404	0.218261
Otu279	D_0__Bacteria; D_1__Bacteroidetes; D_2__Flavobacteriia; D_3__Flavobacteriales; D_4__Flavobacteriaceae	0.25479	0.00267179	0.233545	0.00393165	0.0146415
Otu292	D_0__Bacteria; D_1__Proteobacteria; D_2__Alphaproteobacteria; D_3__Rhodospirillales; D_4__Rhodospirillaceae; D_5__AEGEAN-169 marine group; Ambiguous_taxa	0.254101	0.130621	0.0807556	0.0253592	0.0173655
Otu242	D_0__Bacteria; D_1__Chloroflexi; D_2__Anaerolineae; D_3__Anaerolineales; D_4__Anaerolineaceae; D_5__uncultured; D_6__uncultured organism	0.254076	0.000890596	0.248404	0.00137608	0.00340501
Otu151	D_0__Bacteria; D_1__Firmicutes; D_2__Clostridia; D_3__Clostridiales; D_4__Family XI; D_5__Gottschalkia	0.253494	0.00415612	0.00484534	0.239044	0.00544801
Otu2719	D_0__Bacteria; D_1__Proteobacteria; D_2__Alphaproteobacteria; D_3__Caulobacterales; D_4__Hyphomonadaceae; D_5__uncultured; Ambiguous_taxa	0.253106	0.0106872	0.151175	0.0228036	0.0684407
Otu291	D_0__Bacteria; D_1__Nitrospinae; D_2__Nitrospinia; D_3__Nitrospinales; D_4__Nitrospinaceae; D_5__uncultured; Ambiguous_taxa	0.252825	0.0445298	0.100783	0.0819749	0.0255376
Otu894	D_0__Bacteria; D_1__Proteobacteria; D_2__Gammaproteobacteria; D_3__Oceanospirillales; D_4__Hahellaceae; D_5__Endozoicomonas	0.25154	0.200978	0.0103367	0.00923938	0.0309856
Otu211	D_0__Bacteria; D_1__Proteobacteria; D_2__Alphaproteobacteria; D_3__Rickettsiales; D_4__SAR116 clade; D_5__uncultured bacterium; D_6__uncultured bacterium	0.249694	0.14398	0.0985218	0.00412823	0.00306451
Otu1934	D_0__Bacteria; D_1__Bacteroidetes; D_2__Flavobacteriia; D_3__Flavobacteriales; D_4__Flavobacteriaceae	0.24806	0.0896534	0.0898002	0.0114018	0.0572041
Otu505	D_0__Bacteria; D_1__Bacteroidetes; D_2__Flavobacteriia; D_3__Flavobacteriales; D_4__Flavobacteriaceae	0.246071	0.0172182	0.107243	0.0524876	0.0691217
Otu1131	D_0__Bacteria; D_1__Bacteroidetes; D_2__Flavobacteriia; D_3__Flavobacteriales; D_4__NS9 marine group	0.240889	0.133589	0.0742952	0.00235899	0.0306451
Otu376	D_0__Bacteria; D_1__Proteobacteria; D_2__Betaproteobacteria; D_3__Nitrosomonadales; D_4__Nitrosomonadaceae	0.23888	0.00267179	0.209319	0.0228036	0.00408601
Otu308	D_0__Bacteria; D_1__Bacteroidetes; D_2__Flavobacteriia; D_3__Flavobacteriales; D_4__Flavobacteriaceae; D_5__Pricia	0.235199	0.0068279	0.198982	0.0198548	0.00953402
Otu208	D_0__Bacteria; D_1__Proteobacteria; D_2__Alphaproteobacteria; D_3__Caulobacterales; D_4__Hyphomonadaceae; D_5__Litorimonas; Ambiguous_taxa	0.234473	0.0163276	0.014859	0.138591	0.0646952
Otu205	D_0__Bacteria; D_1__Bacteroidetes; D_2__Flavobacteriia; D_3__Flavobacteriales; D_4__Cryomorphaceae; D_5__uncultured	0.23057	0.00831223	0.00742952	0.144685	0.0701432
Otu317	D_0__Bacteria; D_1__Proteobacteria; D_2__Gammaproteobacteria; D_3__Oceanospirillales	0.230336	0.0086091	0.00355325	0.0247694	0.193404
Otu257	D_0__Bacteria; D_1__Bacteroidetes; D_2__Flavobacteriia; D_3__Flavobacteriales; D_4__Flavobacteriaceae; D_5__NS5 marine group; Ambiguous_taxa	0.224664	0.0130621	0.0132439	0.0230002	0.175358
Otu306	D_0__Bacteria; D_1__Proteobacteria; D_2__Gammaproteobacteria; D_3__Oceanospirillales; D_4__Hahellaceae; D_5__Endozoicomonas; D_6__uncultured gamma proteobacterium	0.222611	0.131215	0.00484534	0.0347951	0.0517561
Otu738	D_0__Bacteria; D_1__Acidobacteria; D_2__Subgroup 26	0.22087	0.0344364	0.086893	0.0682142	0.0313261
Otu258	D_0__Bacteria; D_1__Proteobacteria; D_2__Deltaproteobacteria; D_3__Bradymonadales; D_4__uncultured bacterium; D_5__uncultured bacterium; D_6__uncultured bacterium	0.220449	0.0112809	0.161834	0.0432482	0.00408601
Otu391	D_0__Bacteria; D_1__Firmicutes; D_2__Bacilli; D_3__Bacillales; D_4__Planococcaceae; D_5__Sporosarcina; Ambiguous_taxa	0.217077	0.00118746	0.000646045	0.213882	0.001362
Otu4727	D_0__Bacteria; D_1__Proteobacteria; D_2__Alphaproteobacteria; D_3__Sneathiellales; D_4__Sneathiellaceae; D_5__Sneathiella; D_6__uncultured bacterium	0.215904	0.00504671	0.183477	0.0137608	0.01362
Otu329	D_0__Bacteria; D_1__Gracilibacteria; D_2__uncultured bacterium; D_3__uncultured bacterium; D_4__uncultured bacterium; D_5__uncultured bacterium; D_6__uncultured bacterium	0.215371	0.100044	0.0439311	0.013171	0.0582256
Otu358	D_0__Bacteria; D_1__Chloroflexi; D_2__KD4-96; Ambiguous_taxa; Ambiguous_taxa; Ambiguous_taxa; Ambiguous_taxa	0.215116	0.0178119	0.133085	0.0485559	0.015663
Otu248	D_0__Bacteria; D_1__Proteobacteria; D_2__Gammaproteobacteria; D_3__Gammaproteobacteria Incertae Sedis; D_4__Unknown Family; D_5__Marinicella	0.214944	0.00178119	0.0213195	0.180266	0.011577
Otu297	D_0__Bacteria; D_1__Bacteroidetes; D_2__Flavobacteriia; D_3__Flavobacteriales; D_4__Flavobacteriaceae; D_5__NS5 marine group	0.213646	0	0	0.0290942	0.184551
Otu377	D_0__Bacteria; D_1__Proteobacteria; D_2__Alphaproteobacteria; D_3__Rhodospirillales; D_4__Rhodospirillaceae; D_5__uncultured	0.213408	0.0525452	0.0985218	0.0599577	0.00238351
Otu296	D_0__Bacteria; D_1__Proteobacteria; D_2__Alphaproteobacteria; D_3__Caulobacterales; D_4__Hyphomonadaceae; D_5__uncultured; Ambiguous_taxa	0.212532	0.0124683	0.121133	0.0172993	0.0616307
Otu379	D_0__Bacteria; D_1__Bacteroidetes; D_2__Flavobacteriia; D_3__Flavobacteriales; D_4__Flavobacteriaceae	0.209166	0.00356238	0.18703	0.00393165	0.0146415
Otu206	D_0__Bacteria; D_1__Proteobacteria; D_2__Epsilonproteobacteria; D_3__Campylobacterales; D_4__Campylobacteraceae; D_5__Arcobacter	0.208394	0.0852004	0.0523296	0.0562226	0.0146415
Otu349	D_0__Bacteria; D_1__Proteobacteria; D_2__Alphaproteobacteria; D_3__Caulobacterales; D_4__Hyphomonadaceae; D_5__Hellea	0.208164	0.0124683	0.00839858	0.159035	0.0282616
Otu353	D_0__Bacteria; D_1__Proteobacteria; D_2__Epsilonproteobacteria; D_3__Campylobacterales; D_4__Campylobacteraceae; D_5__Arcobacter; D_6__uncultured Epsilonproteobacteria bacterium	0.206559	0.0955907	0.0607282	0.0230002	0.0272401
Otu269	D_0__Bacteria; D_1__Proteobacteria; D_2__Alphaproteobacteria; D_3__Rhodobacterales; D_4__Rhodobacteraceae	0.205438	0.0279053	0.0222885	0.0214275	0.133817
Otu381	D_0__Bacteria; D_1__Proteobacteria; D_2__Gammaproteobacteria; D_3__BD7-8 marine group; Ambiguous_taxa; Ambiguous_taxa; Ambiguous_taxa	0.20459	0.00118746	0.141807	0.00609406	0.0555016
Otu761	D_0__Bacteria; D_1__Proteobacteria; D_2__Gammaproteobacteria; D_3__Thiotrichales; D_4__Thiotrichaceae; D_5__Thiothrix	0.204526	0.0379988	0.071711	0.0914109	0.00340501
Otu315	D_0__Bacteria; D_1__Bacteroidetes; D_2__Flavobacteriia; D_3__Flavobacteriales; D_4__NS7 marine group	0.202473	0.0267179	0.0171202	0.000982913	0.157652
Otu221	D_0__Bacteria; D_1__Actinobacteria; D_2__Actinobacteria; D_3__Micrococcales; D_4__Microbacteriaceae; D_5__Candidatus Aquiluna	0.20215	0.0629355	0.0313332	0.0847271	0.0231541
Otu745	D_0__Bacteria; D_1__Actinobacteria; D_2__Actinobacteria; D_3__Micrococcales; D_4__Microbacteriaceae; Ambiguous_taxa; Ambiguous_taxa	0.201946	0.000890596	0.00516836	0.195207	0.000681002
Otu474	D_0__Bacteria; D_1__Bacteroidetes; D_2__Flavobacteriia; D_3__Flavobacteriales; D_4__Flavobacteriaceae; D_5__NS4 marine group; Ambiguous_taxa	0.20009	0.125871	0.0655736	0.00353849	0.00510751
Otu558	D_0__Bacteria; D_1__Proteobacteria; D_2__Gammaproteobacteria; D_3__Oceanospirillales; D_4__SAR86 clade	0.199299	0.120824	0.0675117	0.00176924	0.00919352
Otu952	D_0__Bacteria; D_1__Proteobacteria; D_2__Gammaproteobacteria; D_3__Alteromonadales; D_4__Shewanellaceae; D_5__Shewanella	0.199042	0.024343	0.0807556	0.00609406	0.0878492
Otu408	D_0__Bacteria; D_1__Proteobacteria; D_2__Betaproteobacteria	0.198579	0.00474985	0.16668	0.0196583	0.00749102
Otu483	D_0__Bacteria; D_1__Proteobacteria; D_2__Gammaproteobacteria; D_3__Alteromonadales; D_4__Shewanellaceae; D_5__Shewanella	0.198296	0.108356	0.071388	0.0114018	0.00715052
Otu656	D_0__Bacteria; D_1__Proteobacteria; D_2__Gammaproteobacteria; D_3__Oceanospirillales; D_4__Hahellaceae; D_5__Endozoicomonas	0.196329	0.00207806	0.000323022	0.017889	0.176039
Otu372	D_0__Bacteria; D_1__Proteobacteria; D_2__Alphaproteobacteria; D_3__Rhizobiales; D_4__OCS116 clade; D_5__uncultured bacterium; D_6__uncultured bacterium	0.195517	0.0187025	0.101752	0.0672313	0.00783152
Otu4917	D_0__Bacteria; D_1__Bacteroidetes; D_2__Flavobacteriia; D_3__Flavobacteriales; D_4__Flavobacteriaceae; D_5__Polaribacter 1	0.195395	0	0.000646045	0.160018	0.0347311
Otu507	Unassigned	0.194457	0.000890596	0.00161511	0.000589748	0.191361
Otu500	D_0__Bacteria; D_1__Bacteroidetes; D_2__Sphingobacteriia; D_3__Sphingobacteriales; D_4__uncultured; D_5__uncultured Bacteroidetes bacterium; D_6__uncultured Bacteroidetes bacterium	0.194342	0.118152	0.0671887	0.00491457	0.00408601
Otu3357	D_0__Bacteria; D_1__Bacteroidetes; D_2__Flavobacteriia; D_3__Flavobacteriales; D_4__Flavobacteriaceae; D_5__Polaribacter 2; D_6__uncultured Bacteroidetes bacterium	0.194325	0.0118746	0.00549138	0.00432482	0.172634
Otu848	D_0__Bacteria; D_1__Proteobacteria; D_2__Gammaproteobacteria; D_3__BD7-8 marine group; D_4__uncultured gamma proteobacterium; D_5__uncultured gamma proteobacterium; D_6__uncultured gamma proteobacterium	0.193448	0.00474985	0.173463	0.0057009	0.00953402
Otu756	D_0__Bacteria; D_1__Proteobacteria; D_2__Gammaproteobacteria; D_3__BD7-8 marine group; D_4__uncultured bacterium; D_5__uncultured bacterium; D_6__uncultured bacterium	0.193421	0.00593731	0.0129209	0.0601543	0.114408
Otu1259	D_0__Bacteria; D_1__Proteobacteria; D_2__Betaproteobacteria; D_3__Methylophilales; D_4__Methylophilaceae; D_5__Methylotenera; Ambiguous_taxa	0.191932	0.00118746	0.0387627	0.111462	0.0405196
Otu303	D_0__Bacteria; D_1__Proteobacteria; D_2__Alphaproteobacteria; D_3__Rhizobiales; D_4__OCS116 clade; D_5__uncultured bacterium; D_6__uncultured bacterium	0.191095	0.00148433	0.103367	0.0807955	0.00544801
Otu321	Unassigned	0.188913	0	0.00775254	0.00137608	0.179784
Otu318	D_0__Bacteria; D_1__Proteobacteria; D_2__Alphaproteobacteria; D_3__Rickettsiales; D_4__SAR116 clade	0.187598	0.111028	0.0755873	0.000982913	0
Otu768	D_0__Bacteria; D_1__Proteobacteria; D_2__Gammaproteobacteria; D_3__Oceanospirillales; D_4__OM182 clade; D_5__uncultured bacterium; D_6__uncultured bacterium	0.187198	0.03978	0.0500685	0.0632996	0.0340501
Otu1079	D_0__Bacteria; D_1__Proteobacteria; D_2__Gammaproteobacteria; D_3__BD7-8 marine group; D_4__uncultured bacterium; D_5__uncultured bacterium; D_6__uncultured bacterium	0.187001	0	0.134377	0.00393165	0.0486916
Otu241	D_0__Bacteria; D_1__Bacteroidetes; D_2__Flavobacteriia; D_3__Flavobacteriales; D_4__Cryomorphaceae; D_5__Fluviicola; D_6__uncultured bacterium	0.184396	0.120824	0.0597592	0.00176924	0.00204301
Otu354	D_0__Bacteria; D_1__Proteobacteria; D_2__Deltaproteobacteria; D_3__Bdellovibrionales; D_4__Bdellovibrionaceae; D_5__Bdellovibrio	0.183762	0.0130621	0.0681577	0.0906246	0.0119175
Otu466	D_0__Bacteria; D_1__Proteobacteria; D_2__Gammaproteobacteria; D_3__Alteromonadales; D_4__Psychromonadaceae; D_5__Psychromonas	0.18031	0.0739195	0.0377936	0.0532739	0.0153225
Otu564	D_0__Bacteria; D_1__Chloroflexi; D_2__Anaerolineae; D_3__Anaerolineales; D_4__Anaerolineaceae; D_5__uncultured; D_6__uncultured bacterium	0.179967	0.000296865	0.179277	0.000393165	0
Otu554	Unassigned	0.178403	0.00148433	0.00775254	0.0033419	0.165824
Otu596	D_0__Bacteria; D_1__Proteobacteria; D_2__Gammaproteobacteria; D_3__Oceanospirillales; D_4__SAR86 clade	0.177241	0.10984	0.057498	0.00275216	0.00715052
Otu544	D_0__Bacteria; D_1__Proteobacteria; D_2__Gammaproteobacteria; D_3__Xanthomonadales; D_4__JTB255 marine benthic group	0.174426	0.0189994	0.122749	0.0228036	0.00987453
Otu542	D_0__Bacteria; D_1__Firmicutes; D_2__Bacilli; D_3__Bacillales; D_4__Planococcaceae; D_5__Sporosarcina; Ambiguous_taxa	0.173912	0.00445298	0.00839858	0.152548	0.00851252
Otu616	D_0__Bacteria; D_1__Proteobacteria; D_2__Alphaproteobacteria; D_3__Rhodospirillales; D_4__Rhodospirillaceae; D_5__AEGEAN-169 marine group; Ambiguous_taxa	0.173887	0.113699	0.0591131	0.000393165	0.000681002
Otu621	D_0__Bacteria; D_1__Proteobacteria; D_2__Gammaproteobacteria; D_3__BD7-8 marine group; D_4__uncultured gamma proteobacterium; D_5__uncultured gamma proteobacterium; D_6__uncultured gamma proteobacterium	0.17268	0.00415612	0.138577	0.0125813	0.0173655
Otu531	D_0__Bacteria; D_1__Proteobacteria; D_2__Epsilonproteobacteria; D_3__Campylobacterales; D_4__Campylobacteraceae; D_5__Arcobacter	0.171951	0.0748101	0.0423159	0.0432482	0.011577
Otu281	D_0__Bacteria; D_1__Bacteroidetes; D_2__Flavobacteriia; D_3__Flavobacteriales; D_4__Flavobacteriaceae; D_5__Pricia	0.170256	0.00623417	0.148913	0.0123847	0.00272401
Otu646	D_0__Bacteria; D_1__Bacteroidetes; D_2__Flavobacteriia; D_3__Flavobacteriales; D_4__Cryomorphaceae; D_5__uncultured; D_6__uncultured bacterium	0.169801	0.046311	0.0306871	0.00393165	0.0888707
Otu309	D_0__Bacteria; D_1__Chloroflexi; D_2__Anaerolineae; D_3__Anaerolineales; D_4__Anaerolineaceae; D_5__uncultured; D_6__uncultured organism	0.169264	0	0.169264	0	0
Otu367	D_0__Bacteria; D_1__Proteobacteria; D_2__Alphaproteobacteria; D_3__Rhodospirillales; D_4__Rhodospirillaceae	0.168372	0.0121715	0.0361785	0.0304703	0.0895517
Otu341	D_0__Bacteria; D_1__Proteobacteria; D_2__Alphaproteobacteria; D_3__Kordiimonadales; D_4__Kordiimonadaceae; D_5__Kordiimonas; D_6__uncultured bacterium	0.16758	0.0115778	0.0917384	0.0196583	0.0446056
Otu334	D_0__Bacteria; D_1__Bacteroidetes; D_2__Flavobacteriia; D_3__Flavobacteriales; D_4__Flavobacteriaceae; D_5__Winogradskyella	0.166993	0.00178119	0.147621	0.00294874	0.0146415
Otu557	D_0__Bacteria; D_1__Actinobacteria; D_2__Acidimicrobiia; D_3__Acidimicrobiales; D_4__Acidimicrobiaceae; D_5__Ilumatobacter	0.166744	0.00326552	0.116288	0.0434448	0.00374551
Otu252	D_0__Bacteria; D_1__Proteobacteria; D_2__Gammaproteobacteria; D_3__Gammaproteobacteria Incertae Sedis; D_4__Unknown Family; D_5__Marinicella	0.166686	0.000593731	0.00646045	0.150779	0.00885302
Otu283	D_0__Bacteria; D_1__Bacteroidetes; D_2__Flavobacteriia; D_3__Flavobacteriales; D_4__Flavobacteriaceae	0.165818	0.00267179	0.158927	0.00353849	0.000681002
Otu823	D_0__Bacteria; D_1__Proteobacteria; D_2__Alphaproteobacteria; D_3__SAR11 clade	0.164495	0.035327	0.0507145	0.0658552	0.0125985
Otu3668	D_0__Bacteria; D_1__Proteobacteria; D_2__Alphaproteobacteria; D_3__Rhodobacterales; D_4__Rhodobacteraceae; D_5__Sulfitobacter; D_6__uncultured alpha proteobacterium	0.164189	0.0504671	0.0471613	0.0444277	0.0221326
Otu2152	D_0__Bacteria; D_1__Bacteroidetes; D_2__Flavobacteriia; D_3__Flavobacteriales; D_4__Flavobacteriaceae	0.161875	0.00712477	0.0768793	0.0564192	0.0214516
Otu389	D_0__Bacteria; D_1__Proteobacteria; D_2__Alphaproteobacteria; D_3__Rhodobacterales; D_4__Rhodobacteraceae; D_5__uncultured; D_6__uncultured marine bacterium	0.16173	0.0139527	0.0125979	0.0190685	0.116111
Otu528	D_0__Bacteria; D_1__Proteobacteria; D_2__Alphaproteobacteria; D_3__Rhodospirillales; D_4__Rhodospirillaceae; D_5__AEGEAN-169 marine group; Ambiguous_taxa	0.161703	0.102715	0.0439311	0.0119915	0.00306451
Otu802	D_0__Bacteria; D_1__Gracilibacteria; D_2__uncultured bacterium; D_3__uncultured bacterium; D_4__uncultured bacterium; D_5__uncultured bacterium; D_6__uncultured bacterium	0.160118	0.0730289	0.0352094	0.00727356	0.0446056
Otu380	D_0__Bacteria; D_1__Bacteroidetes; D_2__Flavobacteriia; D_3__Flavobacteriales; D_4__Cryomorphaceae; D_5__Crocinitomix; Ambiguous_taxa	0.159719	0.0703571	0.0610512	0.0143505	0.0139605
Otu364	D_0__Bacteria; D_1__Actinobacteria; D_2__Acidimicrobiia; D_3__Acidimicrobiales; D_4__uncultured; D_5__uncultured bacterium; D_6__uncultured bacterium	0.155183	0.00534358	0.129532	0.011795	0.00851252
Otu3875	D_0__Bacteria; D_1__Firmicutes; D_2__Bacilli; D_3__Lactobacillales; D_4__Carnobacteriaceae; D_5__Atopostipes; D_6__uncultured bacterium	0.152664	0.0356238	0.0348864	0.0566158	0.0255376
Otu1249	D_0__Bacteria; D_1__Actinobacteria; D_2__Acidimicrobiia; D_3__Acidimicrobiales; D_4__Acidimicrobiaceae; D_5__Ilumatobacter	0.148925	0.00118746	0.131147	0.0145471	0.00204301
Otu909	D_0__Bacteria; D_1__Proteobacteria; D_2__Gammaproteobacteria; D_3__Alteromonadales; D_4__Shewanellaceae; D_5__Shewanella	0.148659	0.0139527	0.0532987	0.00275216	0.0786557
Otu1989	D_0__Bacteria; D_1__Proteobacteria; D_2__Alphaproteobacteria; D_3__Rhizobiales; D_4__Phyllobacteriaceae	0.148637	0.00356238	0.0206734	0.111462	0.012939
Otu407	D_0__Bacteria; D_1__Proteobacteria; D_2__Alphaproteobacteria; D_3__Rhizobiales	0.147913	0.0112809	0.0700959	0.0658552	0.000681002
Otu568	D_0__Bacteria; D_1__Bacteroidetes; D_2__Flavobacteriia; D_3__Flavobacteriales; D_4__Flavobacteriaceae; D_5__Winogradskyella; Ambiguous_taxa	0.147718	0.00118746	0.119518	0.0110086	0.0160035
Otu992	D_0__Bacteria; D_1__Proteobacteria; D_2__Alphaproteobacteria; D_3__Emcibacterales; D_4__Emcibacteraceae; D_5__Emcibacter; D_6__uncultured alpha proteobacterium	0.14662	0.0421549	0.0536217	0.00589748	0.0449461
Otu847	D_0__Bacteria; D_1__Bacteroidetes; D_2__Flavobacteriia; D_3__Flavobacteriales; D_4__Flavobacteriaceae	0.146503	0.00742163	0.00807556	0.0438379	0.0871682
Otu882	D_0__Bacteria; D_1__Proteobacteria; D_2__Gammaproteobacteria; D_3__Alteromonadales; D_4__Alteromonadaceae; D_5__Paraglaciecola	0.145505	0.0163276	0.11435	0.00393165	0.010896
Otu490	D_0__Bacteria; D_1__Proteobacteria; D_2__Alphaproteobacteria; D_3__Rhizobiales; D_4__Hyphomicrobiaceae	0.144395	0.00237492	0.0184123	0.119522	0.00408601
Otu3998	D_0__Bacteria; D_1__Proteobacteria; D_2__Alphaproteobacteria; D_3__Rhodobacterales; D_4__Rhodobacteraceae	0.143967	0.0712477	0.0419929	0.0222138	0.00851252
Otu1666	D_0__Bacteria; D_1__Proteobacteria; D_2__Betaproteobacteria; D_3__Methylophilales; D_4__Methylophilaceae; D_5__Candidatus Methylopumilus; D_6__uncultured bacterium	0.143857	0.00949969	0.0119518	0.0114018	0.111003
Otu442	D_0__Bacteria; D_1__Bacteroidetes; D_2__Flavobacteriia; D_3__Flavobacteriales; D_4__Flavobacteriaceae; D_5__Aquimarina	0.141716	0.00237492	0.136315	0.000982913	0.00204301
Otu369	D_0__Bacteria; D_1__Actinobacteria; D_2__Acidimicrobiia; D_3__Acidimicrobiales; D_4__Sva0996 marine group; Ambiguous_taxa; Ambiguous_taxa	0.141694	0.00267179	0.122749	0.0121881	0.00408601
Otu1242	D_0__Bacteria; D_1__Proteobacteria; D_2__Gammaproteobacteria; D_3__BD7-8 marine group	0.141295	0.00742163	0.0122749	0.0371541	0.0844442
Otu305	D_0__Bacteria; D_1__Bacteroidetes; D_2__Flavobacteriia; D_3__Flavobacteriales; D_4__Cryomorphaceae; D_5__uncultured; D_6__uncultured bacterium	0.140118	0.0299834	0.0216425	0.000982913	0.0875087
Otu351	D_0__Bacteria; D_1__Bacteroidetes; D_2__Sphingobacteriia; D_3__Sphingobacteriales; D_4__uncultured; D_5__uncultured Bacteroidetes bacterium; D_6__uncultured Bacteroidetes bacterium	0.139393	0.0866847	0.0478073	0.00353849	0.001362
Otu287	D_0__Bacteria; D_1__Proteobacteria; D_2__Alphaproteobacteria; D_3__Rhodobacterales; D_4__Rhodobacteraceae; D_5__uncultured	0.13877	0.00712477	0.028103	0.0980947	0.00544801
Otu1738	D_0__Bacteria; D_1__Bacteroidetes; D_2__Flavobacteriia; D_3__Flavobacteriales; D_4__Flavobacteriaceae; D_5__Aquibacter; D_6__uncultured bacterium	0.136836	0.0635292	0.0516836	0.00255557	0.019068
Otu1186	D_0__Bacteria; D_1__Proteobacteria; D_2__Gammaproteobacteria; D_3__Xanthomonadales; D_4__JTB255 marine benthic group; D_5__uncultured bacterium; D_6__uncultured bacterium	0.135356	0.0136558	0.0965837	0.0159232	0.00919352
Otu688	D_0__Bacteria; D_1__Bacteroidetes; D_2__Flavobacteriia; D_3__Flavobacteriales	0.134278	0.0846066	0.0484534	0.000196583	0.0010215
Otu497	D_0__Bacteria; D_1__Actinobacteria; D_2__Acidimicrobiia; D_3__Acidimicrobiales; D_4__uncultured; D_5__uncultured bacterium; D_6__uncultured bacterium	0.134147	0.00445298	0.11435	0.0115984	0.00374551
Otu2684	D_0__Bacteria; D_1__Bacteroidetes; D_2__Flavobacteriia; D_3__Flavobacteriales; D_4__Flavobacteriaceae	0.133807	0.0893565	0.0442541	0.000196583	0
Otu1112	D_0__Bacteria; D_1__Chloroflexi; D_2__Anaerolineae; D_3__Anaerolineales; D_4__Anaerolineaceae; D_5__uncultured; D_6__uncultured bacterium	0.133705	0.000296865	0.133408	0	0
Otu361	D_0__Bacteria; D_1__Proteobacteria; D_2__Alphaproteobacteria; D_3__Alphaproteobacteria Incertae Sedis; D_4__uncultured; D_5__uncultured bacterium; D_6__uncultured bacterium	0.133489	0.0157339	0.0129209	0.0912143	0.01362
Otu563	D_0__Bacteria; D_1__Firmicutes; D_2__Erysipelotrichia; D_3__Erysipelotrichales; D_4__Erysipelotrichaceae; D_5__Erysipelothrix; D_6__uncultured bacterium	0.131121	0	0	0.131121	0
Otu366	D_0__Bacteria; D_1__Bacteroidetes; D_2__Flavobacteriia; D_3__Flavobacteriales; D_4__Flavobacteriaceae; D_5__Ulvibacter; Ambiguous_taxa	0.130274	0.00178119	0.0452231	0.0611372	0.0221326
Otu4814	D_0__Bacteria; D_1__Actinobacteria; D_2__Acidimicrobiia; D_3__Acidimicrobiales; D_4__uncultured; Ambiguous_taxa; Ambiguous_taxa	0.129296	0.0163276	0.0878621	0.0196583	0.00544801
Otu471	D_0__Bacteria; D_1__Proteobacteria; D_2__Alphaproteobacteria; D_3__Rhizobiales; D_4__Rhodobiaceae; D_5__uncultured	0.128804	0.0709508	0.0452231	0.0078633	0.00476701
Otu551	D_0__Bacteria; D_1__Bacteroidetes; D_2__Flavobacteriia; D_3__Flavobacteriales; D_4__Cryomorphaceae; D_5__uncultured	0.126473	0.0745132	0.0468383	0.00137608	0.00374551
Otu578	D_0__Bacteria; D_1__Actinobacteria; D_2__Actinobacteria; D_3__Micrococcales; D_4__Intrasporangiaceae; D_5__Tetrasphaera; D_6__uncultured bacterium	0.126362	0.00356238	0.00904463	0.112052	0.0017025
Otu1351	D_0__Bacteria; D_1__Proteobacteria; D_2__Gammaproteobacteria; D_3__Alteromonadales; D_4__Alteromonadaceae; D_5__Paraglaciecola	0.125744	0.0160307	0.101106	0.0045214	0.00408601
Otu1845	D_0__Bacteria; D_1__Bacteroidetes; D_2__Flavobacteriia; D_3__Flavobacteriales; D_4__Flavobacteriaceae	0.125723	0.0118746	0.0684808	0.0222138	0.0231541
Otu651	D_0__Bacteria; D_1__Proteobacteria; D_2__Gammaproteobacteria; D_3__Alteromonadales; D_4__Shewanellaceae; D_5__Psychrobium	0.125221	0.0709508	0.0494224	0.00314532	0.0017025
Otu2541	D_0__Bacteria; D_1__Nitrospinae; D_2__Nitrospinia; D_3__Nitrospinales; D_4__Nitrospinaceae; D_5__uncultured; Ambiguous_taxa	0.123758	0.0240461	0.0339174	0.0361712	0.0296236
Otu2831	D_0__Bacteria; D_1__Bacteroidetes; D_2__Flavobacteriia; D_3__Flavobacteriales; D_4__Flavobacteriaceae; D_5__uncultured	0.12375	0.00474985	0.0261648	0.0690005	0.0238351
Otu604	D_0__Bacteria; D_1__Proteobacteria; D_2__Betaproteobacteria; D_3__Rhodocyclales; D_4__Rhodocyclaceae	0.122972	0.00949969	0.0994909	0.0115984	0.00238351
Otu600	D_0__Bacteria; D_1__Proteobacteria; D_2__Gammaproteobacteria; D_3__Cellvibrionales	0.122212	0.00118746	0.120487	0.000196583	0.000340501
Otu357	D_0__Bacteria; D_1__Bacteroidetes; D_2__Flavobacteriia; D_3__Flavobacteriales; D_4__NS9 marine group	0.12159	0.0086091	0.00323022	0.00589748	0.103853
Otu595	D_0__Bacteria; D_1__Proteobacteria; D_2__Betaproteobacteria; D_3__Hydrogenophilales; D_4__Hydrogenophilaceae; D_5__uncultured; D_6__uncultured marine bacterium	0.121486	0.0567013	0.0526527	0.00668381	0.00544801
Otu374	D_0__Bacteria; D_1__Bacteroidetes; D_2__Flavobacteriia; D_3__Flavobacteriales; D_4__Flavobacteriaceae; D_5__Dokdonia	0.119319	0.00504671	0.111443	0.00078633	0.00204301
Otu529	D_0__Bacteria; D_1__Proteobacteria; D_2__Alphaproteobacteria; D_3__Caulobacterales; D_4__Hyphomonadaceae	0.119062	0.00712477	0.00678347	0.079616	0.0255376
Otu344	D_0__Bacteria; D_1__Proteobacteria; D_2__Alphaproteobacteria; D_3__Rhizobiales; D_4__OCS116 clade	0.118588	0.0086091	0.0936765	0.0149403	0.001362
Otu2971	D_0__Bacteria; D_1__Proteobacteria; D_2__Alphaproteobacteria; D_3__SAR11 clade; D_4__Surface 1; Ambiguous_taxa; Ambiguous_taxa	0.117806	0.0157339	0.0229346	0.0328293	0.0463081
Otu569	D_0__Bacteria; D_1__Proteobacteria; D_2__Alphaproteobacteria; D_3__Rhodobacterales; D_4__Rhodobacteraceae; D_5__Sedimentitalea; Ambiguous_taxa	0.117686	0.0157339	0.0167972	0.0790262	0.00612902
Otu477	D_0__Bacteria; D_1__Bacteroidetes; D_2__Flavobacteriia; D_3__Flavobacteriales; D_4__Cryomorphaceae; D_5__uncultured; Ambiguous_taxa	0.116305	0.00949969	0.0788175	0.00176924	0.0262186
Otu1133	D_0__Bacteria; D_1__Proteobacteria; D_2__Gammaproteobacteria; D_3__Alteromonadales; D_4__Colwelliaceae; D_5__Colwellia; D_6__uncultured bacterium	0.11628	0.0780756	0.0374706	0.000393165	0.000340501
Otu695	D_0__Bacteria; D_1__Proteobacteria; D_2__Alphaproteobacteria; D_3__Rhodospirillales; D_4__Rhodospirillaceae; D_5__Magnetospira	0.115368	0.00979656	0.0209965	0.0174959	0.0670787
Otu1841	D_0__Bacteria; D_1__Proteobacteria; D_2__Alphaproteobacteria; D_3__Rhodobacterales; D_4__Rhodobacteraceae; D_5__Sulfitobacter; D_6__uncultured alpha proteobacterium	0.114127	0.0501703	0.0377936	0.0135642	0.0125985
Otu491	D_0__Bacteria; D_1__Proteobacteria; D_2__Gammaproteobacteria; D_3__Oceanospirillales; D_4__Oceanospirillaceae; D_5__Pseudohongiella; D_6__uncultured marine bacterium	0.113447	0.00593731	0.00710649	0.0479662	0.0524371
Otu640	D_0__Bacteria; D_1__Bacteroidetes; D_2__Flavobacteriia; D_3__Flavobacteriales; D_4__NS9 marine group	0.11314	0.00801537	0.0029072	0.00176924	0.100448
Otu359	D_0__Bacteria; D_1__Proteobacteria; D_2__Alphaproteobacteria; D_3__Rhodobacterales; D_4__Rhodobacteraceae; D_5__uncultured; D_6__uncultured alpha proteobacterium	0.112653	0.0457173	0.0303641	0.0277181	0.00885302
Otu951	D_0__Bacteria; D_1__Proteobacteria; D_2__Gammaproteobacteria; D_3__Oceanospirillales; D_4__OM182 clade	0.112535	0.00623417	0.00613743	0.00550431	0.0946592
Otu347	D_0__Bacteria; D_1__Proteobacteria; D_2__Deltaproteobacteria; D_3__Bradymonadales; D_4__uncultured bacterium; D_5__uncultured bacterium; D_6__uncultured bacterium	0.112472	0.000890596	0.105305	0.00491457	0.001362
Otu365	D_0__Bacteria; D_1__Firmicutes; D_2__Bacilli; D_3__Bacillales; D_4__Bacillaceae; D_5__Pseudogracilibacillus	0.112294	0.00207806	0.000969067	0.108907	0.000340501
Otu763	D_0__Bacteria; D_1__Bacteroidetes; D_2__Flavobacteriia; D_3__Flavobacteriales; D_4__Flavobacteriaceae	0.11169	0.00504671	0.0558829	0.035778	0.014982
Otu375	D_0__Bacteria; D_1__Bacteroidetes; D_2__Flavobacteriia; D_3__Flavobacteriales; D_4__Flavobacteriaceae; D_5__NS5 marine group	0.111661	0.0745132	0.0371476	0	0
Otu4064	D_0__Bacteria; D_1__Proteobacteria; D_2__Gammaproteobacteria	0.111335	0.00356238	0.00936765	0.0190685	0.0793367
Otu3773	D_0__Bacteria; D_1__Proteobacteria; D_2__Alphaproteobacteria; D_3__Rhodobacterales; D_4__Rhodobacteraceae	0.111188	0.0216712	0.0268109	0.0575987	0.00510751
Otu342	D_0__Bacteria; D_1__Proteobacteria; D_2__Gammaproteobacteria; D_3__Thiotrichales; D_4__Thiotrichaceae; D_5__Thiothrix	0.110172	0.000890596	0.00161511	0.0399063	0.0677597
Otu480	D_0__Bacteria; D_1__Proteobacteria; D_2__Gammaproteobacteria; D_3__Gammaproteobacteria Incertae Sedis; D_4__Unknown Family; D_5__uncultured	0.109782	0.00237492	0.0313332	0.0709663	0.00510751
Otu513	D_0__Bacteria; D_1__Proteobacteria; D_2__Gammaproteobacteria; D_3__Cellvibrionales; D_4__Porticoccaceae; D_5__SAR92 clade	0.109277	0.00207806	0.0029072	0.00963255	0.0946592
Otu527	D_0__Bacteria; D_1__Nitrospinae; D_2__Nitrospinia; D_3__Nitrospinales; D_4__Nitrospinaceae; D_5__uncultured	0.109245	0.00504671	0.0826937	0.0194617	0.00204301
Otu2772	D_0__Bacteria; D_1__Bacteroidetes; D_2__Flavobacteriia; D_3__Flavobacteriales; D_4__Flavobacteriaceae; D_5__Polaribacter 1	0.109024	0.00148433	0.00419929	0.0165129	0.0868277
Otu3473	D_0__Bacteria; D_1__Proteobacteria; D_2__Alphaproteobacteria; D_3__ss1-B-07-44	0.107948	0.015437	0	0.0182822	0.0742292
Otu289	D_0__Bacteria; D_1__Proteobacteria; D_2__Alphaproteobacteria; D_3__Rhizobiales; D_4__Rhodobiaceae; D_5__Rhodobium; D_6__uncultured alpha proteobacterium	0.107512	0.00148433	0.000969067	0.0941631	0.010896
Otu396	D_0__Bacteria; D_1__Proteobacteria; D_2__Gammaproteobacteria; D_3__Cellvibrionales; D_4__Porticoccaceae; D_5__SAR92 clade	0.107381	0.00148433	0.00129209	0.00688039	0.0977238
Otu502	D_0__Bacteria; D_1__Firmicutes; D_2__Clostridia; D_3__Clostridiales; D_4__Family XI; D_5__Gottschalkia	0.107371	0.00178119	0	0.103206	0.00238351
Otu2760	D_0__Bacteria; D_1__Bacteroidetes; D_2__Flavobacteriia; D_3__Flavobacteriales; D_4__Flavobacteriaceae; D_5__Ulvibacter	0.106201	0.0486859	0.057175	0	0.000340501
Otu2727	D_0__Bacteria; D_1__Proteobacteria; D_2__Deltaproteobacteria; D_3__NB1-j; D_4__uncultured bacterium; D_5__uncultured bacterium; D_6__uncultured bacterium	0.10586	0.0106872	0.0323022	0.049932	0.012939
Otu2321	D_0__Bacteria; D_1__Proteobacteria; D_2__Deltaproteobacteria; D_3__NB1-j; D_4__uncultured bacterium; D_5__uncultured bacterium; D_6__uncultured bacterium	0.105848	0.0100934	0.028426	0.0387268	0.0286021
Otu732	D_0__Bacteria; D_1__Proteobacteria; D_2__Gammaproteobacteria; D_3__Oceanospirillales; D_4__Oceanospirillaceae; D_5__Pseudohongiella	0.105665	0.0567013	0.0400548	0.00550431	0.00340501
Otu668	D_0__Bacteria; D_1__Proteobacteria; D_2__Gammaproteobacteria; D_3__Cellvibrionales; D_4__Halieaceae; D_5__Halioglobus; D_6__uncultured bacterium	0.105398	0.00237492	0.0358555	0.0515046	0.015663
Otu394	D_0__Bacteria; D_1__Proteobacteria; D_2__Deltaproteobacteria; D_3__Myxococcales; D_4__Nannocystaceae; D_5__Nannocystis	0.105323	0.000593731	0.104336	0.000393165	0
Otu2534	D_0__Bacteria; D_1__Bacteroidetes; D_2__Flavobacteriia; D_3__Flavobacteriales; D_4__Flavobacteriaceae	0.104243	0.00564044	0.00323022	0.0269318	0.0684407
Otu343	D_0__Bacteria; D_1__Actinobacteria; D_2__Acidimicrobiia; D_3__Acidimicrobiales; D_4__OM1 clade; Ambiguous_taxa; Ambiguous_taxa	0.103728	0.0172182	0.0155051	0.0699834	0.0010215
Otu1596	D_0__Bacteria; D_1__Bacteroidetes; D_2__Flavobacteriia; D_3__Flavobacteriales; D_4__NS7 marine group; D_5__uncultured bacterium; D_6__uncultured bacterium	0.103693	0.0127652	0.0636354	0.000393165	0.0268996
Otu462	D_0__Bacteria; D_1__Acidobacteria; D_2__Subgroup 26; Ambiguous_taxa; Ambiguous_taxa; Ambiguous_taxa; Ambiguous_taxa	0.103596	0.00207806	0.0914154	0.00805989	0.00204301
Otu939	D_0__Bacteria; D_1__Proteobacteria; D_2__Alphaproteobacteria; D_3__Rhodospirillales; D_4__Rhodospirillaceae; D_5__AEGEAN-169 marine group; Ambiguous_taxa	0.10342	0.0629355	0.0310102	0.00845305	0.0010215
Otu534	D_0__Bacteria; D_1__Proteobacteria; D_2__Alphaproteobacteria; D_3__Rhizobiales; D_4__OCS116 clade; Ambiguous_taxa; Ambiguous_taxa	0.103233	0.0564044	0.0355325	0.0106155	0.000681002
Otu452	D_0__Bacteria; D_1__Proteobacteria; D_2__Gammaproteobacteria; D_3__Oceanospirillales; D_4__Oceanospirillaceae; D_5__Pseudohongiella	0.102908	0.00267179	0.00516836	0.0399063	0.0551611
Otu682	D_0__Bacteria; D_1__Proteobacteria; D_2__Gammaproteobacteria; D_3__Alteromonadales; D_4__Colwelliaceae; D_5__Colwellia	0.102862	0.0160307	0.0752642	0.00373507	0.00783152
Otu511	D_0__Bacteria; D_1__Proteobacteria; D_2__Alphaproteobacteria; D_3__Rhizobiales; D_4__Hyphomicrobiaceae	0.102235	0.00148433	0.0129209	0.0837442	0.00408601
Otu1642	D_0__Bacteria; D_1__Bacteroidetes; D_2__Flavobacteriia; D_3__Flavobacteriales; D_4__Flavobacteriaceae; D_5__Aquibacter	0.101338	0.00118746	0.0991679	0.000982913	0
Otu713	D_0__Bacteria; D_1__Bacteroidetes; D_2__Flavobacteriia; D_3__Flavobacteriales; D_4__Flavobacteriaceae; D_5__Maribacter; D_6__uncultured bacterium	0.101152	0.00207806	0.0852779	0.00766672	0.00612902
Otu348	D_0__Bacteria; D_1__Actinobacteria; D_2__Acidimicrobiia; D_3__Acidimicrobiales; D_4__Sva0996 marine group; D_5__uncultured bacterium; D_6__uncultured bacterium	0.101133	0.00474985	0.0610512	0.0349917	0.000340501
Otu602	D_0__Bacteria; D_1__Proteobacteria; D_2__Alphaproteobacteria; D_3__Rhodospirillales; D_4__Rhodospirillaceae; D_5__OM75 clade; D_6__uncultured alpha proteobacterium	0.100875	0.0270148	0.0255188	0.0418721	0.00646952
Otu599	D_0__Bacteria; D_1__Proteobacteria; D_2__Alphaproteobacteria; D_3__Rhodobacterales; D_4__Rhodobacteraceae; D_5__uncultured; D_6__uncultured alpha proteobacterium	0.10018	0.0549201	0.0361785	0.00805989	0.0010215
Otu2169	D_0__Bacteria; D_1__Proteobacteria; D_2__Alphaproteobacteria; D_3__SAR11 clade; D_4__Surface 1	0.100132	0.0290928	0.0187353	0.01553	0.0367741
Otu336	D_0__Bacteria; D_1__Firmicutes; D_2__Bacilli; D_3__Bacillales; D_4__Bacillaceae	0.0997753	0.000890596	0.000646045	0.0978981	0.000340501
Otu510	D_0__Bacteria; D_1__Nitrospinae; D_2__Nitrospinia; D_3__Nitrospinales; D_4__Nitrospinaceae; D_5__uncultured	0.0997137	0.00593731	0.0678347	0.0157266	0.010215
Otu659	D_0__Bacteria	0.0993189	0.00118746	0.0946456	0.00314532	0.000340501
Otu1146	D_0__Bacteria; D_1__Proteobacteria; D_2__Gammaproteobacteria; D_3__Cellvibrionales; D_4__Spongiibacteraceae; D_5__BD1-7 clade	0.0992144	0.0139527	0.0584671	0.0182822	0.00851252
Otu1974	D_0__Bacteria; D_1__Acidobacteria; D_2__Holophagae; D_3__Subgroup 10; D_4__CA002; D_5__uncultured bacterium; D_6__uncultured bacterium	0.0991642	0.000593731	0.0959377	0.000589748	0.00204301
Otu436	D_0__Bacteria; D_1__Proteobacteria; D_2__Alphaproteobacteria; D_3__Rhizobiales; D_4__OCS116 clade	0.0988997	0.00564044	0.0788175	0.0137608	0.000681002
Otu546	D_0__Bacteria; D_1__Proteobacteria; D_2__Gammaproteobacteria; D_3__E01-9C-26 marine group	0.0986729	0.000296865	0.0197044	0.0776501	0.0010215
Otu512	D_0__Bacteria; D_1__Bacteroidetes; D_2__Flavobacteriia; D_3__Flavobacteriales; D_4__Flavobacteriaceae; D_5__NS5 marine group	0.0974692	0.0691696	0.028103	0.000196583	0
Otu1726	D_0__Bacteria; D_1__Proteobacteria; D_2__Alphaproteobacteria; D_3__Rhodobacterales; D_4__Rhodobacteraceae; D_5__Roseobacter clade NAC11-7 lineage	0.0972912	0.00385925	0.0125979	0.0798125	0.0010215
Otu579	D_0__Bacteria; D_1__Firmicutes; D_2__Clostridia; D_3__Clostridiales; D_4__Family XI; D_5__Gottschalkia	0.0972597	0.000593731	0	0.0963255	0.000340501
Otu573	D_0__Bacteria; D_1__Proteobacteria; D_2__Alphaproteobacteria; D_3__Rhodobacterales; D_4__Rhodobacteraceae; D_5__uncultured; D_6__uncultured Rhodobacteraceae bacterium	0.0972381	0.00474985	0.0167972	0.0668381	0.00885302
Otu670	D_0__Bacteria; D_1__Planctomycetes; D_2__OM190; D_3__uncultured bacterium; D_4__uncultured bacterium; D_5__uncultured bacterium; D_6__uncultured bacterium	0.0969143	0.0163276	0.0788175	0.00176924	0
Otu1263	D_0__Bacteria; D_1__Proteobacteria; D_2__Alphaproteobacteria; D_3__Rhodobacterales; D_4__Rhodobacteraceae; D_5__Planktomarina	0.0968517	0.0457173	0.028749	0.0057009	0.0166845
Otu594	D_0__Bacteria; D_1__Actinobacteria; D_2__Acidimicrobiia; D_3__Acidimicrobiales; D_4__Sva0996 marine group; Ambiguous_taxa; Ambiguous_taxa	0.0964716	0.00356238	0.0839858	0.00688039	0.00204301
Otu698	D_0__Bacteria; D_1__Proteobacteria; D_2__Gammaproteobacteria; D_3__Thiotrichales; D_4__Thiotrichaceae; D_5__Thiothrix	0.095803	0.00742163	0.0058144	0.0304703	0.0520966
Otu587	D_0__Bacteria; D_1__Proteobacteria; D_2__Alphaproteobacteria; D_3__Parvularculales; D_4__Parvularculaceae	0.0955417	0.00178119	0.0923844	0.00137608	0
Otu537	D_0__Bacteria; D_1__Proteobacteria; D_2__Alphaproteobacteria; D_3__Rhodobacterales; D_4__Rhodobacteraceae	0.0951768	0.00207806	0.0662196	0.0265387	0.000340501
Otu494	D_0__Bacteria; D_1__Chloroflexi; D_2__JG30-KF-CM66	0.0939369	0.00237492	0.0875391	0.0033419	0.000681002
Otu473	D_0__Bacteria; D_1__Proteobacteria; D_2__Deltaproteobacteria; D_3__Bdellovibrionales; D_4__Bdellovibrionaceae; D_5__Bdellovibrio	0.0938665	0.000890596	0.0316562	0.0599577	0.001362
Otu413	D_0__Bacteria; D_1__Bacteroidetes; D_2__Flavobacteriia; D_3__Flavobacteriales; D_4__NS9 marine group	0.0937314	0.00178119	0.00387627	0.00294874	0.0851252
Otu1164	D_0__Bacteria; D_1__Bacteroidetes; D_2__Flavobacteriia; D_3__Flavobacteriales; D_4__Flavobacteriaceae	0.093662	0.000296865	0.00419929	0.00982913	0.0793367
Otu470	D_0__Bacteria; D_1__Bacteroidetes; D_2__Flavobacteriia; D_3__Flavobacteriales; D_4__Cryomorphaceae; D_5__uncultured	0.0936536	0.0650135	0.028103	0.000196583	0.000340501
Otu810	D_0__Bacteria; D_1__Bacteroidetes; D_2__Flavobacteriia; D_3__Flavobacteriales; D_4__Cryomorphaceae; D_5__uncultured	0.093158	0.000593731	0.0029072	0.00078633	0.0888707
Otu1409	D_0__Bacteria; D_1__Bacteroidetes; D_2__Flavobacteriia; D_3__Flavobacteriales; D_4__Flavobacteriaceae; D_5__Pibocella	0.0930506	0.00623417	0.0413469	0.017889	0.0275806
Otu481	D_0__Bacteria; D_1__Proteobacteria; D_2__Gammaproteobacteria; D_3__Gammaproteobacteria Incertae Sedis; D_4__Unknown Family; D_5__uncultured	0.0927405	0.00118746	0.0264878	0.0599577	0.00510751
Otu740	D_0__Bacteria; D_1__Proteobacteria; D_2__Alphaproteobacteria; D_3__Parvularculales; D_4__Parvularculaceae; Ambiguous_taxa; Ambiguous_taxa	0.092513	0.000593731	0.0662196	0.0253592	0.000340501
Otu812	D_0__Bacteria; D_1__Firmicutes; D_2__Erysipelotrichia; D_3__Erysipelotrichales; D_4__Erysipelotrichaceae; D_5__Erysipelothrix; D_6__uncultured bacterium	0.0918041	0	0	0.0918041	0
Otu1275	D_0__Bacteria; D_1__Proteobacteria; D_2__Gammaproteobacteria; D_3__Cellvibrionales; D_4__Halieaceae; D_5__OM60(NOR5) clade	0.0910279	0.0151401	0.0348864	0.0328293	0.00817202
Otu482	D_0__Bacteria; D_1__Proteobacteria; D_2__Deltaproteobacteria; D_3__Myxococcales; D_4__Nannocystaceae; D_5__uncultured	0.0908133	0.000296865	0.0901233	0.000393165	0
Otu1080	D_0__Bacteria; D_1__Proteobacteria; D_2__Gammaproteobacteria; D_3__Alteromonadales; D_4__Colwelliaceae	0.0901036	0.00742163	0.0768793	0.00137608	0.00442651
Otu418	D_0__Bacteria; D_1__Proteobacteria; D_2__Gammaproteobacteria; D_3__Alteromonadales; D_4__Shewanellaceae; D_5__Psychrobium	0.0897629	0.0525452	0.0368246	0.000393165	0
Otu862	D_0__Bacteria; D_1__Proteobacteria; D_2__Gammaproteobacteria; D_3__Alteromonadales; D_4__Pseudoalteromonadaceae; D_5__Pseudoalteromonas; D_6__uncultured bacterium	0.0897573	0.00296865	0.0739721	0.011795	0.0010215
Otu660	D_0__Bacteria; D_1__Spirochaetae; D_2__Spirochaetes; D_3__Spirochaetales; D_4__Spirochaetaceae; D_5__Spirochaeta 2; D_6__uncultured marine bacterium	0.0895043	0.0160307	0.00807556	0.0306669	0.0347311
Otu687	D_0__Bacteria; D_1__Proteobacteria; D_2__Gammaproteobacteria; D_3__Cellvibrionales; D_4__Porticoccaceae; D_5__C1-B045	0.0894307	0.00207806	0.0387627	0.00432482	0.0442651
Otu1870	D_0__Bacteria; D_1__Planctomycetes; D_2__vadinHA49; D_3__uncultured bacterium; D_4__uncultured bacterium; D_5__uncultured bacterium; D_6__uncultured bacterium	0.0894127	0.0112809	0.0245497	0.0263421	0.0272401
Otu893	D_0__Bacteria; D_1__Proteobacteria; D_2__Gammaproteobacteria; D_3__KI89A clade	0.0887998	0.000296865	0.0804326	0.00432482	0.00374551
Otu3493	D_0__Bacteria; D_1__Bacteroidetes; D_2__Flavobacteriia; D_3__Flavobacteriales; D_4__Flavobacteriaceae; D_5__uncultured	0.0883676	0.00267179	0.0526527	0.0204446	0.0125985
Otu588	D_0__Bacteria; D_1__Proteobacteria; D_2__Alphaproteobacteria; D_3__Rhizobiales	0.0882468	0.00534358	0.0423159	0.0399063	0.000681002
Otu419	D_0__Bacteria; D_1__Proteobacteria; D_2__Alphaproteobacteria; D_3__Kordiimonadales; D_4__Kordiimonadaceae; D_5__Kordiimonas; D_6__uncultured bacterium	0.08818	0.00712477	0.0697729	0.00923938	0.00204301
Otu1081	D_0__Bacteria; D_1__Proteobacteria; D_2__Gammaproteobacteria; D_3__Vibrionales; D_4__Vibrionaceae; D_5__Vibrio	0.0876437	0.0184057	0.0478073	0.00747014	0.0139605
Otu619	D_0__Bacteria; D_1__Proteobacteria; D_2__Alphaproteobacteria; D_3__Parvularculales; D_4__Parvularculaceae	0.0866858	0.00118746	0.0817247	0.00275216	0.0010215
Otu839	D_0__Bacteria; D_1__Proteobacteria; D_2__Alphaproteobacteria; D_3__Rhizobiales; D_4__OCS116 clade; D_5__uncultured bacterium; D_6__uncultured bacterium	0.0864862	0.0077185	0.00613743	0.0719492	0.000681002
Otu592	D_0__Bacteria; D_1__Proteobacteria; D_2__Betaproteobacteria; D_3__Burkholderiales; D_4__Comamonadaceae; D_5__Polaromonas; D_6__uncultured bacterium	0.0859146	0.00118746	0	0.0847271	0
Otu725	D_0__Bacteria; D_1__Proteobacteria; D_2__Deltaproteobacteria; D_3__Bdellovibrionales; D_4__Bdellovibrionaceae; D_5__OM27 clade; D_6__uncultured bacterium	0.0858035	0.000890596	0.0684808	0.0133676	0.00306451
Otu884	D_0__Bacteria; D_1__Proteobacteria; D_2__Deltaproteobacteria; D_3__NB1-j; D_4__uncultured bacterium; D_5__uncultured bacterium; D_6__uncultured bacterium	0.0857172	0.000890596	0.0762333	0.00314532	0.00544801
Otu520	D_0__Bacteria; D_1__Proteobacteria; D_2__Alphaproteobacteria; D_3__Rickettsiales; D_4__SHWN-night2	0.0853871	0.0377019	0.0342404	0.0114018	0.00204301
Otu710	D_0__Bacteria; D_1__Proteobacteria; D_2__Deltaproteobacteria; D_3__Bdellovibrionales; D_4__Bdellovibrionaceae; D_5__OM27 clade; D_6__uncultured bacterium	0.0850961	0.00118746	0.0671887	0.0129745	0.00374551
Otu785	D_0__Bacteria; D_1__Bacteroidetes; D_2__Flavobacteriia; D_3__Flavobacteriales; D_4__Flavobacteriaceae; D_5__Dokdonia	0.0849205	0.00178119	0.0817247	0.000393165	0.0010215
Otu1780	D_0__Bacteria; D_1__Proteobacteria; D_2__Gammaproteobacteria	0.0847417	0.00178119	0.0823707	0.000589748	0
Otu444	D_0__Bacteria; D_1__Acidobacteria; D_2__Holophagae; D_3__Subgroup 10; D_4__CA002; D_5__uncultured bacterium; D_6__uncultured bacterium	0.0845207	0.000890596	0.0784945	0.00275216	0.00238351
Otu854	D_0__Bacteria; D_1__Proteobacteria; D_2__Gammaproteobacteria; D_3__Cellvibrionales	0.0844881	0.000593731	0.0830168	0.000196583	0.000681002
Otu1677	D_0__Bacteria; D_1__Bacteroidetes; D_2__Flavobacteriia; D_3__Flavobacteriales; D_4__Cryomorphaceae; D_5__uncultured; D_6__uncultured bacterium	0.084043	0.00178119	0.00452231	0.00078633	0.0769532
Otu566	D_0__Bacteria; D_1__Bacteroidetes; D_2__Flavobacteriia; D_3__Flavobacteriales; D_4__Cryomorphaceae; D_5__Crocinitomix; D_6__uncultured bacterium	0.0833814	0.0501703	0.0310102	0.0011795	0.0010215
Otu709	D_0__Bacteria; D_1__Chloroflexi; D_2__KD4-96; D_3__uncultured bacterium; D_4__uncultured bacterium; D_5__uncultured bacterium; D_6__uncultured bacterium	0.0833396	0.000890596	0.0704189	0.0110086	0.0010215
Otu445	D_0__Bacteria; D_1__Proteobacteria; D_2__Alphaproteobacteria; D_3__Rhodospirillales; D_4__Rhodospirillaceae; D_5__OM75 clade; D_6__uncultured alpha proteobacterium	0.0833185	0.0136558	0.0113058	0.0556329	0.00272401
Otu4135	D_0__Bacteria; D_1__Bacteroidetes; D_2__Flavobacteriia; D_3__Flavobacteriales; D_4__Cryomorphaceae; D_5__Crocinitomix; Ambiguous_taxa	0.0826701	0.0169213	0.0306871	0.0228036	0.012258
Otu1155	D_0__Bacteria; D_1__Planctomycetes; D_2__OM190; D_3__uncultured bacterium; D_4__uncultured bacterium; D_5__uncultured bacterium; D_6__uncultured bacterium	0.0822504	0.0350301	0.0439311	0.00294874	0.000340501
Otu2135	D_0__Bacteria; D_1__Proteobacteria; D_2__Deltaproteobacteria; D_3__Bdellovibrionales; D_4__Bacteriovoracaceae; D_5__Peredibacter	0.0822329	0.0792631	0.000323022	0.00196583	0.000681002
Otu852	D_0__Bacteria; D_1__Bacteroidetes; D_2__Flavobacteriia; D_3__Flavobacteriales; D_4__Flavobacteriaceae	0.0817517	0.0178119	0.0245497	0.0322395	0.00715052
Otu4884	D_0__Bacteria; D_1__Proteobacteria; D_2__Epsilonproteobacteria; D_3__Campylobacterales; D_4__Helicobacteraceae; D_5__Sulfurovum	0.0810735	0.0368113	0.0326253	0.0106155	0.0010215
Otu829	D_0__Bacteria; D_1__Proteobacteria; D_2__Gammaproteobacteria; D_3__KI89A clade; D_4__uncultured marine bacterium; D_5__uncultured marine bacterium; D_6__uncultured marine bacterium	0.0810215	0.000593731	0.0587901	0.00393165	0.017706
Otu1224	D_0__Bacteria; D_1__Bacteroidetes; D_2__Flavobacteriia; D_3__Flavobacteriales; D_4__Flavobacteriaceae	0.0807305	0	0	0.0078633	0.0728672
Otu818	D_0__Bacteria; D_1__Bacteroidetes; D_2__Flavobacteriia; D_3__Flavobacteriales; D_4__Flavobacteriaceae; D_5__uncultured	0.0803209	0.00207806	0.0171202	0.0406926	0.0204301
Otu549	D_0__Bacteria; D_1__Proteobacteria; D_2__Deltaproteobacteria; D_3__Myxococcales; D_4__Nannocystaceae; D_5__Nannocystis; Ambiguous_taxa	0.0796741	0.000593731	0.0768793	0.0011795	0.0010215
Otu384	Unassigned	0.0796255	0	0	0.0377439	0.0418816
Otu1659	D_0__Bacteria; D_1__Proteobacteria; D_2__Gammaproteobacteria; D_3__Thiotrichales; D_4__Thiotrichaceae; D_5__Thiothrix; Ambiguous_taxa	0.0795181	0.0290928	0.0268109	0.0212309	0.00238351
Otu985	D_0__Bacteria; D_1__Proteobacteria; D_2__AEGEAN-245; D_3__uncultured bacterium; D_4__uncultured bacterium; D_5__uncultured bacterium; D_6__uncultured bacterium	0.0794197	0.00267179	0.0694498	0.00491457	0.00238351
Otu742	D_0__Bacteria; D_1__Proteobacteria; D_2__Epsilonproteobacteria; D_3__Campylobacterales; D_4__Campylobacteraceae; D_5__Arcobacter; D_6__uncultured bacterium	0.079174	0.035327	0.028426	0.00963255	0.00578851
Otu807	D_0__Bacteria; D_1__Proteobacteria; D_2__Alphaproteobacteria; D_3__Sphingomonadales; D_4__Sphingomonadaceae	0.0791573	0.00356238	0.0620203	0.00982913	0.00374551
Otu1063	D_0__Bacteria; D_1__Bacteroidetes; D_2__Flavobacteriia; D_3__Flavobacteriales; D_4__Flavobacteriaceae; D_5__Maribacter; Ambiguous_taxa	0.0788791	0.00178119	0.0649275	0.0057009	0.00646952
Otu942	D_0__Bacteria; D_1__Proteobacteria; D_2__Gammaproteobacteria; D_3__Cellvibrionales; D_4__Porticoccaceae; D_5__C1-B045; D_6__uncultured gamma proteobacterium	0.078855	0.00415612	0.0274569	0.0057009	0.0415411
Otu1862	D_0__Bacteria; D_1__Proteobacteria; D_2__Gammaproteobacteria; D_3__Xanthomonadales; D_4__JTB255 marine benthic group; D_5__uncultured gamma proteobacterium; D_6__uncultured gamma proteobacterium	0.0787061	0.00326552	0.0626664	0.00766672	0.00510751
Otu585	D_0__Bacteria; D_1__Bacteroidetes; D_2__Flavobacteriia; D_3__Flavobacteriales; D_4__Cryomorphaceae; D_5__uncultured; D_6__uncultured Bacteroidetes bacterium	0.078517	0.00385925	0.00129209	0.0011795	0.0721862
Otu658	D_0__Bacteria; D_1__Proteobacteria; D_2__Alphaproteobacteria; D_3__Rhodospirillales; D_4__Rhodospirillaceae; D_5__uncultured	0.0782304	0.0258273	0.0348864	0.0100257	0.00749102
Otu3672	D_0__Bacteria; D_1__Actinobacteria; D_2__Acidimicrobiia; D_3__Acidimicrobiales; D_4__uncultured; Ambiguous_taxa; Ambiguous_taxa	0.077786	0.00385925	0.0584671	0.00864963	0.00681002
Otu720	D_0__Bacteria; D_1__Bacteroidetes; D_2__Cytophagia; D_3__Cytophagales; D_4__Flammeovirgaceae; D_5__Ekhidna	0.0776996	0.0433423	0.0222885	0.0100257	0.00204301
Otu446	D_0__Bacteria; D_1__Proteobacteria; D_2__Alphaproteobacteria; D_3__Rickettsiales; D_4__EF100-94H03	0.0775194	0.0106872	0.0232576	0.0418721	0.0017025
Otu373	D_0__Bacteria; D_1__Bacteroidetes; D_2__Flavobacteriia; D_3__Flavobacteriales; D_4__Cryomorphaceae	0.0773756	0.0477953	0.0255188	0.00235899	0.0017025
Otu618	D_0__Bacteria; D_1__Proteobacteria; D_2__Betaproteobacteria; D_3__Burkholderiales; D_4__Comamonadaceae; D_5__uncultured; D_6__uncultured bacterium	0.0771804	0.000593731	0.00161511	0.067821	0.00715052
Otu439	D_0__Bacteria; D_1__Proteobacteria; D_2__Alphaproteobacteria; D_3__Caulobacterales; D_4__Hyphomonadaceae; D_5__Robiginitomaculum; D_6__uncultured bacterium	0.0769734	0.00534358	0.0190583	0.0416755	0.010896
Otu704	D_0__Bacteria; D_1__Proteobacteria; D_2__Epsilonproteobacteria; D_3__Campylobacterales; D_4__Campylobacteraceae; D_5__Arcobacter; D_6__uncultured bacterium	0.076608	0.0391862	0.0222885	0.0100257	0.00510751
Otu501	D_0__Bacteria; D_1__Bacteroidetes; D_2__Flavobacteriia; D_3__Flavobacteriales; D_4__Flavobacteriaceae	0.0765274	0.0290928	0.0277799	0.0145471	0.00510751
Otu2883	D_0__Bacteria; D_1__Proteobacteria; D_2__Alphaproteobacteria; D_3__Rhizobiales; D_4__Phyllobacteriaceae; D_5__uncultured; Ambiguous_taxa	0.0763813	0.00356238	0.0132439	0.0558295	0.00374551
Otu1411	D_0__Bacteria; D_1__Proteobacteria; D_2__Betaproteobacteria; D_3__Rhodocyclales; D_4__Rhodocyclaceae; D_5__Azoarcus; D_6__uncultured bacterium	0.0763006	0.00949969	0.0594361	0.00668381	0.000681002
Otu773	D_0__Bacteria; D_1__Nitrospinae; D_2__Nitrospinia; D_3__Nitrospinales; D_4__Nitrospinaceae; D_5__Nitrospina; D_6__uncultured bacterium	0.0762126	0.000296865	0.0681577	0.00707697	0.000681002
Otu495	D_0__Bacteria; D_1__Bacteroidetes; D_2__Flavobacteriia; D_3__Flavobacteriales; D_4__Cryomorphaceae; D_5__uncultured	0.0761982	0.00148433	0.000969067	0.000196583	0.0735482
Otu3497	D_0__Bacteria; D_1__Proteobacteria; D_2__Alphaproteobacteria; D_3__Emcibacterales; D_4__Emcibacteraceae; D_5__Emcibacter	0.0758612	0.0299834	0.0213195	0.00412823	0.0204301
Otu1585	D_0__Bacteria; D_1__Proteobacteria; D_2__Gammaproteobacteria; D_3__Cellvibrionales; D_4__Halieaceae; D_5__Halioglobus; D_6__uncultured bacterium	0.0758254	0.000890596	0.0613743	0.00845305	0.00510751
Otu634	D_0__Bacteria; D_1__Proteobacteria; D_2__Alphaproteobacteria; D_3__Caulobacterales; D_4__Hyphomonadaceae; D_5__Robiginitomaculum; D_6__uncultured bacterium	0.0756433	0.00237492	0.014536	0.0495388	0.00919352
Otu404	D_0__Bacteria; D_1__Proteobacteria; D_2__Alphaproteobacteria; D_3__Rickettsiales; D_4__Rickettsiaceae; D_5__uncultured; D_6__uncultured organism	0.0753457	0.00623417	0.0125979	0.0418721	0.0146415
Otu516	D_0__Bacteria; D_1__Bacteroidetes; D_2__Flavobacteriia; D_3__Flavobacteriales; D_4__NS7 marine group	0.0751898	0.00178119	0.00355325	0.000393165	0.0694622
Otu2443	D_0__Bacteria; D_1__Planctomycetes; D_2__vadinHA49; D_3__uncultured microorganism; D_4__uncultured microorganism; D_5__uncultured microorganism; D_6__uncultured microorganism	0.0751814	0.0112809	0.0222885	0.0259489	0.015663
Otu435	D_0__Bacteria; D_1__Firmicutes; D_2__Erysipelotrichia; D_3__Erysipelotrichales; D_4__Erysipelotrichaceae; D_5__Erysipelothrix; D_6__uncultured bacterium	0.075161	0.00296865	0.00484534	0.0642825	0.00306451
Otu948	D_0__Bacteria; D_1__Acidobacteria; D_2__Holophagae; D_3__Subgroup 10; D_4__CA002; D_5__uncultured bacterium; D_6__uncultured bacterium	0.0749151	0.000296865	0.0746182	0	0
Otu538	D_0__Bacteria; D_1__Proteobacteria; D_2__Betaproteobacteria; D_3__Hydrogenophilales; D_4__Hydrogenophilaceae; D_5__uncultured; D_6__uncultured marine bacterium	0.0748725	0.0412643	0.0326253	0.000982913	0
Otu1047	D_0__Bacteria; D_1__Bacteroidetes; D_2__Flavobacteriia; D_3__Flavobacteriales; D_4__Flavobacteriaceae; D_5__Aquimarina; Ambiguous_taxa	0.074838	0.0133589	0.0251958	0.0281113	0.00817202
Otu2718	D_0__Bacteria; D_1__Proteobacteria; D_2__Gammaproteobacteria; D_3__Oceanospirillales; D_4__Oceanospirillaceae; D_5__Pseudohongiella	0.0746426	0.0406706	0.0271339	0.00275216	0.00408601
Otu1785	D_0__Bacteria; D_1__Bacteroidetes; D_2__Flavobacteriia; D_3__Flavobacteriales; D_4__Flavobacteriaceae; D_5__Maribacter; D_6__uncultured Bacteroidetes bacterium	0.0746072	0.00653104	0.0323022	0.0115984	0.0241756
Otu4125	D_0__Bacteria; D_1__Proteobacteria; D_2__Gammaproteobacteria; D_3__Alteromonadales; D_4__Colwelliaceae; D_5__Colwellia; Ambiguous_taxa	0.0739161	0.0267179	0.0235806	0.00727356	0.016344
Otu620	D_0__Bacteria; D_1__Proteobacteria; D_2__Alphaproteobacteria; D_3__Rhodospirillales; D_4__Rhodospirillaceae; D_5__Magnetospira; D_6__uncultured alpha proteobacterium	0.0737774	0.000890596	0.0549138	0.00707697	0.010896
Otu2248	D_0__Bacteria; D_1__Proteobacteria; D_2__Alphaproteobacteria; D_3__Alphaproteobacteria Incertae Sedis; D_4__uncultured; D_5__uncultured bacterium; D_6__uncultured bacterium	0.0736805	0.010984	0.00419929	0.0503251	0.00817202
Otu4074	D_0__Bacteria; D_1__Proteobacteria; D_2__Alphaproteobacteria; D_3__Parvularculales; D_4__Parvularculaceae; D_5__uncultured bacterium; D_6__uncultured bacterium	0.0732024	0.00593731	0.0119518	0.0481627	0.00715052
Otu678	D_0__Bacteria; D_1__Bacteroidetes; D_2__Flavobacteriia; D_3__Flavobacteriales; D_4__NS9 marine group; Ambiguous_taxa; Ambiguous_taxa	0.0731309	0.0175151	0.00807556	0.00157266	0.0459676
Otu1373	D_0__Bacteria; D_1__Proteobacteria; D_2__Gammaproteobacteria; D_3__Cellvibrionales; D_4__Porticoccaceae; D_5__SAR92 clade	0.0728148	0	0.000323022	0.00609406	0.0663977
Otu514	D_0__Bacteria; D_1__Actinobacteria; D_2__Acidimicrobiia; D_3__Acidimicrobiales; D_4__OM1 clade	0.0726159	0.000593731	0.0132439	0.0587782	0
Otu412	D_0__Bacteria; D_1__Bacteroidetes; D_2__Flavobacteriia; D_3__Flavobacteriales; D_4__Cryomorphaceae; D_5__Fluviicola; D_6__uncultured bacterium	0.0724818	0.0457173	0.0235806	0.00216241	0.0010215
Otu3575	D_0__Bacteria; D_1__Proteobacteria; D_2__Alphaproteobacteria; D_3__Rhodobacterales; D_4__Rhodobacteraceae	0.0722737	0.0258273	0.0203504	0.011795	0.014301
Otu597	D_0__Bacteria; D_1__Bacteroidetes; D_2__Flavobacteriia; D_3__Flavobacteriales; D_4__Flavobacteriaceae; D_5__Pseudofulvibacter; Ambiguous_taxa	0.0722332	0.00801537	0.0455462	0.0135642	0.00510751
Otu393	D_0__Bacteria; D_1__Proteobacteria; D_2__Gammaproteobacteria; D_3__E01-9C-26 marine group	0.0721821	0.000296865	0.0135669	0.0566158	0.0017025
Otu4446	D_0__Bacteria; D_1__Proteobacteria; D_2__Gammaproteobacteria; D_3__Alteromonadales; D_4__Shewanellaceae; D_5__Shewanella	0.072088	0.041858	0.0268109	0.00137608	0.00204301
Otu1125	D_0__Bacteria; D_1__Proteobacteria; D_2__Alphaproteobacteria; D_3__Rhizobiales; D_4__Hyphomicrobiaceae; D_5__Maritalea	0.0718785	0.00712477	0.00452231	0.0581885	0.00204301
Otu1035	D_0__Bacteria; D_1__Proteobacteria; D_2__Deltaproteobacteria; D_3__NB1-j; D_4__uncultured delta proteobacterium; D_5__uncultured delta proteobacterium; D_6__uncultured delta proteobacterium	0.071775	0.00148433	0.0616973	0.00314532	0.00544801
Otu472	D_0__Bacteria; D_1__Proteobacteria; D_2__Gammaproteobacteria; D_3__KI89A clade	0.0716299	0.00356238	0.0232576	0.0294874	0.0153225
Otu339	D_0__Bacteria; D_1__Proteobacteria; D_2__Alphaproteobacteria; D_3__Rhizobiales; D_4__Rhodobiaceae; D_5__Rhodobium; D_6__uncultured alpha proteobacterium	0.0715358	0.00415612	0.0058144	0.0554363	0.00612902
Otu590	D_0__Bacteria; D_1__Bacteroidetes; D_2__Flavobacteriia; D_3__Flavobacteriales; D_4__NS9 marine group; Ambiguous_taxa; Ambiguous_taxa	0.0708002	0.0166245	0.00419929	0.00196583	0.0480106
Otu641	D_0__Bacteria; D_1__Actinobacteria; D_2__Acidimicrobiia; D_3__Acidimicrobiales; D_4__Sva0996 marine group; D_5__uncultured bacterium; D_6__uncultured bacterium	0.0706834	0.00207806	0.0423159	0.0259489	0.000340501
Otu4298	D_0__Bacteria; D_1__Proteobacteria; D_2__Alphaproteobacteria; D_3__Rhodobacterales; D_4__Rhodobacteraceae	0.0703112	0.00237492	0.00387627	0.00923938	0.0548206
Otu2737	D_0__Bacteria; D_1__Proteobacteria; D_2__Deltaproteobacteria; D_3__Bdellovibrionales; D_4__Bdellovibrionaceae; D_5__OM27 clade; D_6__uncultured bacterium	0.0693491	0.0136558	0.0226116	0.0194617	0.01362
Otu437	D_0__Bacteria; D_1__Proteobacteria; D_2__Alphaproteobacteria; D_3__Caulobacterales; D_4__Hyphomonadaceae	0.0687671	0.00385925	0.00419929	0.0477696	0.012939
Otu2350	D_0__Bacteria; D_1__Proteobacteria; D_2__Gammaproteobacteria; D_3__Xanthomonadales; D_4__JTB255 marine benthic group; D_5__uncultured bacterium; D_6__uncultured bacterium	0.0686903	0.000890596	0.0516836	0.0110086	0.00510751
Otu1176	D_0__Bacteria; D_1__Proteobacteria; D_2__Gammaproteobacteria; D_3__Oceanospirillales; D_4__Oceanospirillaceae; D_5__Pseudohongiella	0.0685632	0.00742163	0.0565289	0.00393165	0.000681002
Otu1211	D_0__Bacteria; D_1__Bacteroidetes; D_2__Flavobacteriia; D_3__Flavobacteriales; D_4__Flavobacteriaceae; D_5__Maritimimonas; D_6__uncultured bacterium	0.0684555	0.00296865	0.0539448	0.00609406	0.00544801
Otu1555	D_0__Bacteria; D_1__Proteobacteria; D_2__Alphaproteobacteria; D_3__Rhodobacterales; D_4__Rhodobacteraceae; D_5__uncultured; D_6__uncultured alpha proteobacterium	0.0681408	0.0175151	0.0116288	0.0318464	0.00715052
Otu390	D_0__Bacteria; D_1__Proteobacteria; D_2__Alphaproteobacteria; D_3__Rhodobacterales; D_4__Rhodobacteraceae; D_5__uncultured	0.0678166	0.00207806	0.0135669	0.0501286	0.00204301
Otu1454	D_0__Bacteria; D_1__Bacteroidetes; D_2__Flavobacteriia; D_3__Flavobacteriales; D_4__Flavobacteriaceae	0.0677993	0.0216712	0.0248727	0.0188719	0.00238351
Otu647	D_0__Bacteria; D_1__Chloroflexi; D_2__Anaerolineae; D_3__Anaerolineales; D_4__Anaerolineaceae; D_5__uncultured; D_6__uncultured bacterium	0.0676996	0.000296865	0.0668656	0.000196583	0.000340501
Otu1957	D_0__Bacteria; D_1__Firmicutes; D_2__Clostridia; D_3__Clostridiales; D_4__Family XI	0.0676284	0.000593731	0	0.0670347	0
Otu266	D_0__Bacteria; D_1__Proteobacteria; D_2__Alphaproteobacteria; D_3__Rickettsiales; D_5__Proteobacteria bacterium JGI 0000113-D06; D_6__Proteobacteria bacterium JGI 0000113-D06	0.0673752	0	0	0.0670347	0.000340501
Otu553	D_0__Bacteria; D_1__Proteobacteria; D_2__Alphaproteobacteria; D_3__Rhodospirillales; D_4__Rhodospirillaceae; D_5__Magnetospira; D_6__uncultured alpha proteobacterium	0.0671938	0.00178119	0.0516836	0.00589748	0.00783152
Otu1252	D_0__Bacteria; D_1__Bacteroidetes; D_2__Flavobacteriia; D_3__Flavobacteriales; D_4__Flavobacteriaceae	0.0670898	0.00326552	0.043608	0.0123847	0.00783152
Otu1453	D_0__Bacteria; D_1__Proteobacteria; D_2__Deltaproteobacteria; D_3__Myxococcales; D_4__Nannocystaceae; D_5__Nannocystis; Ambiguous_taxa	0.0668906	0.00237492	0.0597592	0.00373507	0.0010215
Otu718	D_0__Bacteria; D_1__Proteobacteria; D_2__Alphaproteobacteria; D_3__Alphaproteobacteria Incertae Sedis; D_4__Unknown Family; D_5__uncultured; D_6__uncultured bacterium	0.0667812	0.00593731	0.00904463	0.0422653	0.00953402
Otu598	D_0__Bacteria; D_1__Actinobacteria; D_2__Actinobacteria; D_3__Micrococcales; D_4__Micrococcaceae; D_5__Pseudarthrobacter; D_6__uncultured bacterium	0.0667745	0.00385925	0.00936765	0.0515046	0.00204301
Otu629	D_0__Bacteria; D_1__Proteobacteria; D_2__AEGEAN-245; Ambiguous_taxa; Ambiguous_taxa; Ambiguous_taxa; Ambiguous_taxa	0.0666701	0.00178119	0.0306871	0.0290942	0.00510751
Otu1582	D_0__Bacteria; D_1__Proteobacteria; D_2__Gammaproteobacteria	0.0666134	0.00920283	0.0255188	0.0220173	0.00987453
Otu3011	D_0__Bacteria; D_1__Proteobacteria; D_2__Gammaproteobacteria; D_3__Gammaproteobacteria Incertae Sedis; D_4__Unknown Family; D_5__Marinicella	0.066576	0.000593731	0.00387627	0.060744	0.001362
Otu1121	D_0__Bacteria; D_1__Proteobacteria; D_2__Gammaproteobacteria; D_3__Cellvibrionales; D_4__Halieaceae; D_5__Halioglobus	0.0662425	0	0.0239037	0.0351883	0.00715052
Otu837	D_0__Bacteria; D_1__Proteobacteria; D_2__Gammaproteobacteria; D_3__Oceanospirillales; D_4__Oceanospirillaceae; D_5__Pseudohongiella	0.0659417	0.00237492	0.00419929	0.0402994	0.019068
Otu1765	D_0__Bacteria; D_1__Firmicutes; D_2__Clostridia; D_3__Clostridiales; D_4__Family XI; D_5__Anaerosalibacter	0.0656825	0.0127652	0.00807556	0.0373507	0.00749102
Otu863	D_0__Bacteria; D_1__Proteobacteria; D_2__Deltaproteobacteria; D_3__Myxococcales; D_4__Nannocystaceae; D_5__uncultured	0.0655649	0.000296865	0.0649275	0	0.000340501
Otu1344	D_0__Bacteria; D_1__Proteobacteria; D_2__Gammaproteobacteria	0.0654852	0.0127652	0.0226116	0.0188719	0.0112365
Otu525	Unassigned	0.0653762	0	0	0	0.0653762
Otu801	D_0__Bacteria; D_1__Proteobacteria; D_2__AEGEAN-245; D_3__uncultured bacterium; D_4__uncultured bacterium; D_5__uncultured bacterium; D_6__uncultured bacterium	0.0652631	0.00326552	0.0542678	0.00432482	0.00340501
Otu840	D_0__Bacteria; D_1__Proteobacteria; D_2__Alphaproteobacteria; D_3__Rhodobacterales; D_4__Rhodobacteraceae; D_5__uncultured; Ambiguous_taxa	0.0650182	0.0175151	0.0193813	0.0243762	0.00374551
Otu1026	D_0__Bacteria; D_1__Bacteroidetes; D_2__Bacteroidia; D_3__Bacteroidales; D_4__Porphyromonadaceae; D_5__Proteiniphilum; Ambiguous_taxa	0.0648723	0	0	0.0648723	0
Otu673	D_0__Bacteria; D_1__Acidobacteria; D_2__Holophagae; D_3__Subgroup 10; D_4__CA002; D_5__uncultured bacterium; D_6__uncultured bacterium	0.0644722	0.00356238	0.0562059	0.0033419	0.001362
Otu689	D_0__Bacteria; D_1__Proteobacteria; D_2__Gammaproteobacteria; D_3__Oceanospirillales; D_4__JL-ETNP-Y6	0.0642584	0.0157339	0.0058144	0.00491457	0.0377956
Otu861	D_0__Bacteria	0.0640024	0.000296865	0.0633124	0.000393165	0
Otu811	D_0__Bacteria; D_1__Proteobacteria; D_2__Betaproteobacteria; D_3__Methylophilales; D_4__Methylophilaceae; D_5__OM43 clade; Ambiguous_taxa	0.0623205	0.00267179	0.00226116	0.0369575	0.0204301
Otu937	D_0__Bacteria; D_1__Proteobacteria; D_2__Alphaproteobacteria; D_3__Rhizobiales; D_4__Bradyrhizobiaceae	0.0622933	0.0068279	0.00516836	0.047573	0.00272401
Otu3163	D_0__Bacteria; D_1__Proteobacteria; D_2__Alphaproteobacteria; D_3__Rhodobacterales; D_4__Rhodobacteraceae; D_5__uncultured; D_6__uncultured alpha proteobacterium	0.0621698	0.0130621	0.0216425	0.0220173	0.00544801
Otu1251	D_0__Bacteria; D_1__Proteobacteria; D_2__Gammaproteobacteria; D_3__Oceanospirillales; D_4__OM182 clade	0.0621022	0.00118746	0.000646045	0	0.0602687
Otu3010	D_0__Bacteria; D_1__Proteobacteria; D_2__Gammaproteobacteria; D_3__Alteromonadales; D_4__Psychromonadaceae; D_5__Psychromonas	0.0620967	0.0329521	0.0239037	0.00353849	0.0017025
Otu928	D_0__Bacteria; D_1__Proteobacteria; D_2__Gammaproteobacteria; D_3__BD7-8 marine group; D_4__uncultured marine bacterium; D_5__uncultured marine bacterium; D_6__uncultured marine bacterium	0.0620769	0.00178119	0.00742952	0.0324361	0.0204301
Otu1900	D_0__Bacteria; D_1__Proteobacteria; D_2__Alphaproteobacteria; D_3__Alphaproteobacteria Incertae Sedis; D_4__Unknown Family; D_5__uncultured; D_6__uncultured bacterium	0.0619696	0.00534358	0.0164741	0.0353849	0.00476701
Otu3656	D_0__Bacteria; D_1__Proteobacteria; D_2__Deltaproteobacteria; D_3__SAR324 clade(Marine group B)	0.0614792	0.0124683	0.0122749	0.0200514	0.0166845
Otu1043	D_0__Bacteria; D_1__Actinobacteria; D_2__Acidimicrobiia; D_3__Acidimicrobiales; D_4__OM1 clade; D_5__uncultured bacterium; D_6__uncultured bacterium	0.0614665	0.00178119	0.0245497	0.0347951	0.000340501
Otu925	D_0__Bacteria; D_1__Proteobacteria; D_2__Alphaproteobacteria; D_3__Rickettsiales; D_4__MD3-55	0.0612458	0.0189994	0.01389	0.0045214	0.0238351
Otu819	D_0__Bacteria; D_1__Proteobacteria; D_2__Gammaproteobacteria; D_3__Oceanospirillales; D_4__MBAE14; Ambiguous_taxa; Ambiguous_taxa	0.0612001	0.000296865	0.0584671	0.000393165	0.00204301
Otu2681	D_0__Bacteria; D_1__Bacteroidetes; D_2__Flavobacteriia; D_3__Flavobacteriales; D_4__Cryomorphaceae; D_5__uncultured; D_6__uncultured marine bacterium	0.0610676	0.024343	0.0297181	0.000196583	0.00681002
Otu3726	D_0__Bacteria; D_1__Proteobacteria; D_2__Alphaproteobacteria; D_3__Rhodobacterales; D_4__Rhodobacteraceae; D_5__Roseobacter clade NAC11-7 lineage	0.0609048	0.00385925	0.00742952	0.047573	0.00204301
Otu1101	D_0__Bacteria; D_1__Proteobacteria; D_2__Gammaproteobacteria; D_3__Alteromonadales; D_4__Alteromonadaceae; D_5__Paraglaciecola; Ambiguous_taxa	0.0604767	0.00504671	0.00452231	0.0406926	0.010215
Otu555	D_0__Bacteria; D_1__Proteobacteria; D_2__Gammaproteobacteria; D_3__Oceanospirillales; D_4__OM182 clade	0.0602741	0.0160307	0.0116288	0.00707697	0.0255376
Otu883	D_0__Bacteria; D_1__Proteobacteria; D_2__Gammaproteobacteria; D_3__Oceanospirillales; D_4__Alcanivoracaceae; D_5__Kangiella; D_6__uncultured bacterium	0.0602633	0.00207806	0.0058144	0.0172993	0.0350716
Otu1447	D_0__Bacteria; D_1__Proteobacteria; D_2__Alphaproteobacteria; D_3__Rhodobacterales; D_4__Rhodobacteraceae	0.0600918	0.00979656	0.00839858	0.0395131	0.00238351
Otu541	D_0__Bacteria; D_1__Nitrospinae; D_2__Nitrospinia; D_3__Nitrospinales; D_4__Nitrospinaceae; D_5__Nitrospina; D_6__uncultured bacterium	0.060056	0.000296865	0.0597592	0	0
Otu938	D_0__Bacteria; D_1__Proteobacteria; D_2__Gammaproteobacteria; D_3__Alteromonadales; D_4__Shewanellaceae; D_5__Shewanella; Ambiguous_taxa	0.0600224	0.00712477	0.0490994	0.000393165	0.00340501
Otu624	D_0__Bacteria; D_1__Proteobacteria; D_2__Gammaproteobacteria; D_3__Oceanospirillales; D_4__Oleiphilaceae; D_5__Oleiphilus	0.0599471	0.000296865	0.0591131	0.000196583	0.000340501
Otu875	D_0__Bacteria; D_1__Proteobacteria; D_2__Gammaproteobacteria; D_3__Gammaproteobacteria Incertae Sedis; D_4__Unknown Family; D_5__uncultured; D_6__uncultured bacterium	0.0597323	0.00148433	0.0174432	0.0326327	0.00817202
Otu386	D_0__Bacteria; D_1__Proteobacteria; D_2__Alphaproteobacteria; D_3__Rhizobiales; D_4__Rhodobiaceae; D_5__Rhodobium; D_6__uncultured alpha proteobacterium	0.059691	0	0.000323022	0.0593679	0
Otu3959	D_0__Bacteria; D_1__Proteobacteria; D_2__Gammaproteobacteria; D_3__Oceanospirillales	0.0596428	0.0302803	0.00969067	0.00196583	0.017706
Otu873	D_0__Bacteria; D_1__Firmicutes; D_2__Bacilli; D_3__Lactobacillales; D_4__Carnobacteriaceae; D_5__Carnobacterium; D_6__uncultured bacterium	0.0596265	0.00237492	0.00226116	0.05465	0.000340501
Otu906	D_0__Bacteria; D_1__Proteobacteria; D_2__Deltaproteobacteria; D_3__Bradymonadales; D_4__uncultured bacterium; D_5__uncultured bacterium; D_6__uncultured bacterium	0.0595791	0.00385925	0.0487764	0.00353849	0.00340501
Otu1055	D_0__Bacteria; D_1__Proteobacteria; D_2__Epsilonproteobacteria; D_3__Campylobacterales; D_4__Helicobacteraceae; D_5__Sulfurimonas; D_6__uncultured bacterium	0.0594586	0.0234524	0.0177662	0.0141539	0.00408601
Otu795	D_0__Bacteria; D_1__Proteobacteria; D_2__Gammaproteobacteria; D_3__KI89A clade; D_4__uncultured marine bacterium; D_5__uncultured marine bacterium; D_6__uncultured marine bacterium	0.0591281	0	0.0474843	0.00176924	0.00987453
Otu895	D_0__Bacteria; D_1__Proteobacteria; D_2__Betaproteobacteria; D_3__Nitrosomonadales; D_4__Nitrosomonadaceae; D_5__Nitrosomonas	0.059093	0.026421	0.0216425	0.00353849	0.00749102
Otu844	D_0__Bacteria; D_1__Proteobacteria; D_2__Gammaproteobacteria; D_3__HOC36; D_4__uncultured bacterium; D_5__uncultured bacterium; D_6__uncultured bacterium	0.0589678	0.00326552	0.00258418	0	0.0531181
Otu1518	D_0__Bacteria; D_1__Proteobacteria; D_2__Gammaproteobacteria; D_3__Cellvibrionales; D_4__Porticoccaceae; D_5__SAR92 clade	0.0589525	0	0.000646045	0.00314532	0.0551611
Otu792	Unassigned	0.0589294	0.00118746	0.0029072	0.00137608	0.0534586
Otu628	D_0__Bacteria; D_1__Proteobacteria; D_2__Alphaproteobacteria; D_3__Rhodospirillales; D_4__Rhodospirillaceae; D_5__uncultured	0.0587623	0.01989	0.0261648	0.00589748	0.00681002
Otu753	D_0__Bacteria; D_1__Proteobacteria; D_2__Gammaproteobacteria; D_3__Gammaproteobacteria Incertae Sedis; D_4__Unknown Family; D_5__Marinicella	0.0585187	0	0.00161511	0.0562226	0.000681002
Otu548	D_0__Bacteria; D_1__Proteobacteria; D_2__Gammaproteobacteria; D_3__Oceanospirillales; D_4__Oceanospirillaceae; D_5__Pseudohongiella; D_6__uncultured marine bacterium	0.0585019	0.00118746	0.00516836	0.0143505	0.0377956
Otu1151	D_0__Bacteria; D_1__Proteobacteria; D_2__Alphaproteobacteria; D_3__Rhodobacterales; D_4__Rhodobacteraceae; D_5__uncultured; D_6__uncultured bacterium	0.0584686	0.000296865	0.0387627	0.0190685	0.000340501
Otu559	D_0__Bacteria; D_1__Proteobacteria; D_2__Gammaproteobacteria; D_3__Oceanospirillales; D_4__Oceanospirillaceae; D_5__Pseudohongiella	0.0584538	0.0368113	0.0216425	0	0
Otu1891	D_0__Bacteria; D_1__Actinobacteria; D_2__Actinobacteria; D_3__Micrococcales; D_4__Microbacteriaceae	0.0584256	0.0347333	0.0203504	0.0033419	0
Otu2425	D_0__Bacteria; D_1__Proteobacteria; D_2__Gammaproteobacteria; D_3__Cellvibrionales; D_4__Halieaceae; D_5__OM60(NOR5) clade; D_6__uncultured bacterium	0.0583508	0.00385925	0.0329483	0.0184788	0.00306451
Otu1070	D_0__Bacteria; D_1__Firmicutes; D_2__Bacilli; D_3__Bacillales; D_4__Planococcaceae; D_5__Sporosarcina; Ambiguous_taxa	0.0583079	0.00207806	0.00129209	0.0542568	0.000681002
Otu4746	D_0__Bacteria; D_1__Proteobacteria; D_2__Alphaproteobacteria; D_3__Rhodobacterales; D_4__Rhodobacteraceae; D_5__Paracoccus	0.0581111	0.021968	0.0174432	0.0163164	0.00238351
Otu764	D_0__Bacteria; D_1__Proteobacteria; D_2__Gammaproteobacteria; D_3__KI89A clade	0.0580982	0.00118746	0.0526527	0.00255557	0.0017025
Otu817	D_0__Bacteria; D_1__Bacteroidetes; D_2__Flavobacteriia; D_3__Flavobacteriales; D_4__Flavobacteriaceae	0.0580927	0.00296865	0.0529757	0.00078633	0.001362
Otu487	D_0__Bacteria; D_1__Proteobacteria; D_2__Gammaproteobacteria; D_3__Legionellales; D_4__Coxiellaceae; D_5__Coxiella; D_6__uncultured bacterium	0.0580079	0.000296865	0.00161511	0.0438379	0.012258
Otu686	D_0__Bacteria; D_1__Proteobacteria; D_2__Gammaproteobacteria; D_3__Chromatiales; D_4__Granulosicoccaceae; D_5__Granulosicoccus	0.0577537	0.00267179	0.00355325	0.0300771	0.0214516
Otu966	D_0__Bacteria; D_1__Proteobacteria; D_2__Gammaproteobacteria; D_3__Gammaproteobacteria Incertae Sedis; D_4__Unknown Family; D_5__uncultured; D_6__uncultured bacterium	0.0576377	0.00326552	0.0155051	0.033419	0.00544801
Otu1180	D_0__Bacteria; D_1__Bacteroidetes; D_2__Flavobacteriia; D_3__Flavobacteriales; D_4__Flavobacteriaceae	0.057493	0.00653104	0.0423159	0.00353849	0.00510751
Otu838	D_0__Bacteria; D_1__Chloroflexi; D_2__JG30-KF-CM66	0.0574718	0.000296865	0.057175	0	0
Otu1388	D_0__Bacteria; D_1__Chloroflexi; D_2__Caldilineae; D_3__Caldilineales; D_4__Caldilineaceae; D_5__uncultured	0.0574381	0.00356238	0.0255188	0.0235899	0.00476701
Otu790	D_0__Bacteria; D_1__Proteobacteria; D_2__Betaproteobacteria; D_3__Methylophilales; D_4__Methylophilaceae; D_5__OM43 clade; Ambiguous_taxa	0.0571536	0.00474985	0.00419929	0.0332225	0.014982
Otu613	D_0__Bacteria; D_1__Proteobacteria; D_2__Alphaproteobacteria; D_3__Rhizobiales; D_4__OCS116 clade; D_5__uncultured bacterium; D_6__uncultured bacterium	0.0571002	0	0	0.0564192	0.000681002
Otu460	D_0__Bacteria; D_1__Proteobacteria; D_2__Gammaproteobacteria; D_3__Legionellales; D_4__Coxiellaceae; D_5__Coxiella; D_6__uncultured bacterium	0.0568665	0.00326552	0.00484534	0.0347951	0.0139605
Otu1022	D_0__Bacteria; D_1__Acidobacteria; D_2__Holophagae; D_3__Subgroup 10; D_4__CA002; D_5__uncultured bacterium; D_6__uncultured bacterium	0.056583	0.00949969	0.0119518	0.0106155	0.0245161
Otu1255	D_0__Bacteria; D_1__Proteobacteria; D_2__Alphaproteobacteria; D_3__Alphaproteobacteria Incertae Sedis; D_4__Unknown Family; D_5__uncultured; D_6__uncultured bacterium	0.0564868	0.00445298	0.01389	0.0292908	0.00885302
Otu3133	D_0__Bacteria; D_1__Proteobacteria; D_2__Alphaproteobacteria; D_3__Rhodobacterales; D_4__Rhodobacteraceae; D_5__Roseovarius; D_6__uncultured organism	0.0560692	0	0.00516836	0.0495388	0.001362
Otu987	D_0__Bacteria; D_1__Proteobacteria; D_2__Alphaproteobacteria; D_3__Rhodospirillales; D_4__AT-s3-44; D_5__uncultured alpha proteobacterium; D_6__uncultured alpha proteobacterium	0.0560537	0.000593731	0.0478073	0.00629064	0.001362
Otu872	D_0__Bacteria; D_1__Actinobacteria; D_2__Acidimicrobiia; D_3__Acidimicrobiales; D_4__uncultured; D_5__uncultured bacterium; D_6__uncultured bacterium	0.0560114	0.00712477	0.0229346	0.0119915	0.0139605
Otu589	D_0__Bacteria; D_1__Proteobacteria; D_2__Alphaproteobacteria; D_3__Rickettsiales; D_4__Rickettsiaceae; D_5__uncultured; D_6__uncultured organism	0.0556835	0.00415612	0.00904463	0.0349917	0.00749102
Otu956	D_0__Bacteria; D_1__Actinobacteria; D_2__Actinobacteria; D_3__Micrococcales; D_4__Microbacteriaceae	0.0552898	0.000593731	0.00226116	0.0520944	0.000340501
Otu935	D_0__Bacteria; D_1__Bacteroidetes; D_2__Cytophagia; D_3__Cytophagales; D_4__Flammeovirgaceae; D_5__Ekhidna	0.0548429	0.0314677	0.014859	0.00511115	0.00340501
Otu1824	D_0__Bacteria; D_1__Proteobacteria; D_2__Gammaproteobacteria; D_3__Alteromonadales; D_4__Shewanellaceae; D_5__Shewanella; D_6__uncultured bacterium	0.0540899	0.00979656	0.0310102	0.00511115	0.00817202
Otu626	D_0__Bacteria; D_1__Proteobacteria; D_2__Gammaproteobacteria; D_3__Oceanospirillales; D_4__Alcanivoracaceae; D_5__Kangiella; D_6__uncultured bacterium	0.0537399	0	0.000323022	0.0149403	0.0384766
Otu1160	D_0__Bacteria; D_1__Firmicutes; D_2__Clostridia; D_3__Clostridiales; D_4__Family XI; D_5__Tissierella; D_6__uncultured bacterium	0.0535708	0.000296865	0	0.0532739	0
Otu3966	D_0__Bacteria; D_1__Proteobacteria; D_2__Gammaproteobacteria; D_3__Alteromonadales; D_4__Shewanellaceae; D_5__Shewanella; D_6__uncultured gamma proteobacterium	0.053553	0.0332489	0.0171202	0.00216241	0.0010215
Otu1038	D_0__Bacteria; D_1__Bacteroidetes; D_2__Cytophagia; D_3__Cytophagales; D_4__Flammeovirgaceae; D_5__Reichenbachiella; Ambiguous_taxa	0.0533835	0.000296865	0.0300411	0.013171	0.00987453
Otu729	D_0__Bacteria; D_1__Saccharibacteria; D_2__uncultured bacterium; D_3__uncultured bacterium; D_4__uncultured bacterium; D_5__uncultured bacterium; D_6__uncultured bacterium	0.0533443	0.0142495	0.0319792	0.00609406	0.0010215
Otu1134	D_0__Bacteria; D_1__Proteobacteria; D_2__Alphaproteobacteria	0.0529843	0.0192963	0.0119518	0.0135642	0.00817202
Otu1607	D_0__Bacteria; D_1__Proteobacteria; D_2__Gammaproteobacteria; D_3__Cellvibrionales; D_4__Halieaceae; D_5__Haliea	0.0529814	0.00237492	0.0377936	0.00668381	0.00612902
Otu766	D_0__Bacteria; D_1__Bacteroidetes; D_2__Flavobacteriia; D_3__Flavobacteriales; D_4__Flavobacteriaceae; D_5__Maribacter; Ambiguous_taxa	0.0529334	0.000593731	0.0497455	0.00157266	0.0010215
Otu1796	D_0__Bacteria; D_1__Proteobacteria; D_2__Alphaproteobacteria; D_3__Sphingomonadales; D_4__Sphingomonadaceae	0.0528764	0.00178119	0.0413469	0.00668381	0.00306451
Otu1258	D_0__Bacteria; D_1__Proteobacteria; D_2__Alphaproteobacteria; D_3__Rhizobiales; D_4__OCS116 clade	0.0528336	0	0.0445771	0.00825647	0
Otu2204	D_0__Bacteria; D_1__Proteobacteria; D_2__Alphaproteobacteria	0.0526052	0.00356238	0.000323022	0.00275216	0.0459676
Otu1163	D_0__Bacteria; D_1__Proteobacteria; D_2__Gammaproteobacteria; D_3__Vibrionales; D_4__Vibrionaceae; D_5__Vibrio	0.0525591	0.00949969	0.0387627	0.00157266	0.00272401
Otu1002	D_0__Bacteria; D_1__Proteobacteria; D_2__Gammaproteobacteria; D_3__Alteromonadales; D_4__Psychromonadaceae; D_5__Psychromonas	0.0523811	0.0287959	0.0113058	0.0115984	0.000681002
Otu3851	D_0__Bacteria; D_1__Proteobacteria; D_2__Alphaproteobacteria; D_3__Rhodobacterales; D_4__Rhodobacteraceae; D_5__uncultured; D_6__uncultured alpha proteobacterium	0.0523282	0.0103903	0.014213	0.0188719	0.00885302
Otu1606	D_0__Bacteria; D_1__Proteobacteria; D_2__Gammaproteobacteria; D_3__Alteromonadales	0.0522186	0.0338427	0.0125979	0.00373507	0.00204301
Otu775	D_0__Bacteria; D_1__Proteobacteria; D_2__Deltaproteobacteria; D_3__Myxococcales; D_4__Nannocystaceae; D_5__uncultured	0.0520388	0.00356238	0.00904463	0.0172993	0.0221326
Otu606	D_0__Bacteria; D_1__Bacteroidetes; D_2__Flavobacteriia; D_3__Flavobacteriales; D_4__Flavobacteriaceae; D_5__Winogradskyella; Ambiguous_taxa	0.0519869	0.0163276	0.0209965	0.0115984	0.00306451
Otu539	D_0__Bacteria; D_1__Proteobacteria; D_2__Alphaproteobacteria; D_3__Rhizobiales; D_4__uncultured	0.0519327	0.00296865	0.00516836	0.0397097	0.00408601
Otu813	D_0__Bacteria; D_1__Proteobacteria	0.0518696	0.0237492	0.0116288	0.00491457	0.011577
Otu681	D_0__Bacteria; D_1__Actinobacteria; D_2__Acidimicrobiia; D_3__Acidimicrobiales; D_4__OM1 clade; D_5__uncultured bacterium; D_6__uncultured bacterium	0.0517224	0.00237492	0.043608	0.00471798	0.0010215
Otu4568	D_0__Bacteria; D_1__Proteobacteria; D_2__Gammaproteobacteria; D_3__BD7-8 marine group; Ambiguous_taxa; Ambiguous_taxa; Ambiguous_taxa	0.0516448	0	0.0507145	0.000589748	0.000340501
Otu1378	D_0__Bacteria; D_1__Firmicutes; D_2__Bacilli; D_3__Lactobacillales; D_4__Enterococcaceae; D_5__Enterococcus; Ambiguous_taxa	0.0516341	0.0222649	0.0229346	0.00609406	0.000340501
Otu1205	D_0__Bacteria; D_1__Proteobacteria; D_2__Betaproteobacteria; D_3__Hydrogenophilales; D_4__Hydrogenophilaceae; D_5__uncultured	0.0516269	0.000890596	0.0371476	0.0112052	0.00238351
Otu1754	D_0__Bacteria; D_1__Firmicutes; D_2__Clostridia; D_3__Clostridiales; D_4__Lachnospiraceae; D_5__uncultured	0.0513993	0	0	0.0507183	0.000681002
Otu1194	D_0__Bacteria; D_1__Proteobacteria; D_2__Gammaproteobacteria; D_3__Oceanospirillales; D_4__OM182 clade; D_5__uncultured bacterium; D_6__uncultured bacterium	0.051146	0.026421	0.0232576	0.00078633	0.000681002
Otu731	D_0__Bacteria; D_1__Bacteroidetes; D_2__Cytophagia; D_3__Cytophagales; D_4__Flammeovirgaceae; D_5__Reichenbachiella; Ambiguous_taxa	0.0511233	0.000296865	0.0316562	0.0147437	0.00442651
Otu911	D_0__Bacteria; D_1__Proteobacteria; D_2__Alphaproteobacteria; D_3__Rhodospirillales; D_4__Rhodospirillaceae; D_5__uncultured; D_6__uncultured bacterium	0.0511005	0.000593731	0.0478073	0.00235899	0.000340501
Otu2596	D_0__Bacteria; D_1__Bacteroidetes; D_2__Flavobacteriia; D_3__Flavobacteriales; D_4__Flavobacteriaceae; D_5__Polaribacter 1	0.0510999	0	0.000323022	0.00412823	0.0466486
Otu486	Unassigned	0.0510262	0.000890596	0.000323022	0.0477696	0.00204301
Otu929	D_0__Bacteria; D_1__Spirochaetae; D_2__Spirochaetes; D_3__Spirochaetales; D_4__Spirochaetaceae; D_5__Spirochaeta 2; D_6__uncultured marine bacterium	0.050992	0.0267179	0.000646045	0.00353849	0.0200896
Otu1358	D_0__Bacteria; D_1__Proteobacteria; D_2__Gammaproteobacteria; D_3__Oceanospirillales; D_4__Oceanospirillaceae; D_5__Pseudohongiella	0.0508356	0.00326552	0.00419929	0.0314532	0.0119175
Otu1066	D_0__Bacteria; D_1__Spirochaetae; D_2__Spirochaetes; D_3__Spirochaetales; D_4__Spirochaetaceae; D_5__Spirochaeta 2; D_6__uncultured marine bacterium	0.0501381	0	0	0.00825647	0.0418816
Otu1446	D_0__Bacteria; D_1__Proteobacteria; D_2__Alphaproteobacteria; D_3__Rhodobacterales; D_4__Rhodobacteraceae; D_5__Halocynthiibacter	0.0500723	0.00267179	0.0155051	0.0271284	0.00476701
Otu833	D_0__Bacteria; D_1__Actinobacteria; D_2__Actinobacteria; D_3__Micrococcales; D_4__Micrococcaceae; D_5__Arthrobacter	0.0500187	0.00237492	0.00323022	0.0430516	0.001362
Otu781	D_0__Bacteria; D_1__Bacteroidetes; D_2__Flavobacteriia; D_3__Flavobacteriales; D_4__Cryomorphaceae; D_5__Crocinitomix	0.0498314	0.00118746	0.00193813	0.0436413	0.00306451
Otu3528	D_0__Bacteria; D_1__Bacteroidetes; D_2__Flavobacteriia; D_3__Flavobacteriales; D_4__Flavobacteriaceae; Ambiguous_taxa; Ambiguous_taxa	0.0496884	0.0237492	0.0216425	0.00157266	0.00272401
Otu2540	D_0__Bacteria; D_1__Proteobacteria; D_2__Deltaproteobacteria; D_3__Bdellovibrionales; D_4__Bacteriovoracaceae; D_5__Peredibacter	0.0495686	0.0483891	0	0.0011795	0
Otu3610	D_0__Bacteria; D_1__Proteobacteria; D_2__Alphaproteobacteria; D_3__Rhodobacterales; D_4__Rhodobacteraceae	0.0494348	0.0136558	0.0226116	0.00805989	0.00510751
Otu890	D_0__Bacteria; D_1__Lentisphaerae; D_2__Lentisphaeria; D_3__Lentisphaerales; D_4__Lentisphaeraceae; D_5__Lentisphaera	0.0493768	0.00118746	0.0449001	0.00294874	0.000340501
Otu915	D_0__Bacteria; D_1__Proteobacteria; D_2__Alphaproteobacteria; D_3__Rickettsiales; D_4__Anaplasmataceae; D_5__Neorickettsia; Ambiguous_taxa	0.048999	0.00415612	0.00549138	0.0332225	0.00612902
Otu3201	D_0__Bacteria; D_1__Bacteroidetes; D_2__Flavobacteriia; D_3__Flavobacteriales; D_4__Flavobacteriaceae	0.0487865	0	0	0.0045214	0.0442651
Otu4867	D_0__Bacteria; D_1__Bacteroidetes; D_2__Flavobacteriia; D_3__Flavobacteriales; D_4__Flavobacteriaceae	0.0487453	0.030874	0.0167972	0.000393165	0.000681002
Otu3081	D_0__Bacteria; D_1__Bacteroidetes; D_2__Flavobacteriia; D_3__Flavobacteriales; D_4__Flavobacteriaceae; D_5__Polaribacter 1	0.048714	0.0255304	0.0219655	0.000196583	0.0010215
Otu793	D_0__Bacteria; D_1__Proteobacteria; D_2__Gammaproteobacteria; D_3__Cellvibrionales; D_4__Halieaceae; D_5__Haliea; D_6__uncultured bacterium	0.0486468	0.00207806	0.0342404	0.00688039	0.00544801
Otu1001	D_0__Bacteria; D_1__Proteobacteria; D_2__Gammaproteobacteria; D_3__HOC36; D_4__uncultured bacterium; D_5__uncultured bacterium; D_6__uncultured bacterium	0.0485259	0.00296865	0.00129209	0	0.0442651
Otu3671	D_0__Bacteria; D_1__Proteobacteria; D_2__Gammaproteobacteria; D_3__Cellvibrionales; D_4__Halieaceae; D_5__OM60(NOR5) clade	0.0484287	0.00474985	0.029395	0.0125813	0.0017025
Otu533	D_0__Bacteria; D_1__Proteobacteria; D_2__Alphaproteobacteria; D_3__Rickettsiales; D_4__T9d; D_5__uncultured bacterium; D_6__uncultured bacterium	0.0483788	0.0189994	0.0213195	0.00805989	0
Otu661	D_0__Bacteria; D_1__Actinobacteria; D_2__Acidimicrobiia; D_3__Acidimicrobiales; D_4__Iamiaceae; D_5__Iamia; Ambiguous_taxa	0.0483607	0.000296865	0.014213	0.0328293	0.0010215
Otu1399	D_0__Bacteria; D_1__Bacteroidetes; D_2__Bacteroidia; D_3__Bacteroidales; D_4__Porphyromonadaceae; D_5__Proteiniphilum; D_6__uncultured bacterium	0.0483408	0.000890596	0.000323022	0.0467867	0.000340501
Otu1060	D_0__Bacteria; D_1__Bacteroidetes; D_2__Flavobacteriia; D_3__Flavobacteriales; D_4__Cryomorphaceae; D_5__uncultured	0.0482536	0.000593731	0.000969067	0.00412823	0.0425626
Otu1062	D_0__Bacteria; D_1__Bacteroidetes; D_2__Flavobacteriia; D_3__Flavobacteriales; D_4__Flavobacteriaceae; D_5__Lutibacter; Ambiguous_taxa	0.0482428	0.00564044	0.00484534	0.000982913	0.0367741
Otu1671	D_0__Bacteria; D_1__Bacteroidetes; D_2__Flavobacteriia; D_3__Flavobacteriales; D_4__Flavobacteriaceae	0.0482158	0.00326552	0.0161511	0.0192651	0.00953402
Otu1044	D_0__Bacteria; D_1__Proteobacteria; D_2__Alphaproteobacteria; D_3__Rhodobacterales; D_4__Rhodobacteraceae; D_5__uncultured	0.0482132	0.000890596	0.029395	0.0169061	0.0010215
Otu1093	D_0__Bacteria; D_1__Bacteroidetes; D_2__Flavobacteriia; D_3__Flavobacteriales; D_4__NS9 marine group	0.0479645	0.0228586	0.0155051	0.00176924	0.00783152
Otu633	D_0__Bacteria; D_1__Proteobacteria; D_2__Gammaproteobacteria; D_3__Gammaproteobacteria Incertae Sedis; D_4__Unknown Family; D_5__Marinicella	0.0479523	0	0.000969067	0.0469832	0
Otu762	D_0__Bacteria; D_1__Proteobacteria; D_2__AEGEAN-245	0.0478532	0.000890596	0.0203504	0.0194617	0.00715052
Otu1000	D_0__Bacteria; D_1__Proteobacteria; D_2__Gammaproteobacteria; D_3__Cellvibrionales; D_4__Halieaceae; D_5__Halioglobus; D_6__uncultured bacterium	0.047655	0.00356238	0.0277799	0.0112052	0.00510751
Otu1059	D_0__Bacteria; D_1__Proteobacteria; D_2__Deltaproteobacteria; D_3__NB1-j; D_4__uncultured bacterium; D_5__uncultured bacterium; D_6__uncultured bacterium	0.0475351	0.00267179	0.0371476	0.00294874	0.00476701
Otu765	D_0__Bacteria; D_1__Planctomycetes; D_2__OM190; D_3__uncultured bacterium; D_4__uncultured bacterium; D_5__uncultured bacterium; D_6__uncultured bacterium	0.0475283	0.000296865	0.0468383	0.000393165	0
Otu1463	D_0__Bacteria; D_1__Actinobacteria; D_2__Acidimicrobiia; D_3__Acidimicrobiales; D_4__OM1 clade; D_5__uncultured bacterium; D_6__uncultured bacterium	0.0473164	0.00326552	0.029072	0.0139574	0.0010215
Otu706	D_0__Bacteria; D_1__Proteobacteria; D_2__Proteobacteria Incertae Sedis; D_3__Unknown Order; D_4__Unknown Family	0.0470449	0.000296865	0.00323022	0.0172993	0.0262186
Otu776	D_0__Bacteria; D_1__Proteobacteria; D_2__Alphaproteobacteria; D_3__Rhodospirillales; D_4__Rhodospirillaceae; D_5__uncultured	0.0469891	0.00296865	0.0348864	0.00845305	0.000681002
Otu1197	D_0__Bacteria; D_1__Bacteroidetes; D_2__Flavobacteriia; D_3__Flavobacteriales; D_4__Flavobacteriaceae	0.0468559	0.00415612	0.0316562	0.00491457	0.00612902
Otu1331	D_0__Bacteria; D_1__Bacteroidetes; D_2__Flavobacteriia; D_3__Flavobacteriales; D_4__Flavobacteriaceae; D_5__Tenacibaculum; Ambiguous_taxa	0.0468348	0.00178119	0.0403778	0.000589748	0.00408601
Otu2032	D_0__Bacteria; D_1__Proteobacteria; D_2__Alphaproteobacteria; D_3__Rhodospirillales; D_4__Rhodospirillaceae; D_5__uncultured	0.0466672	0.00474985	0.0332713	0.00353849	0.00510751
Otu1308	D_0__Bacteria; D_1__Proteobacteria; D_2__Gammaproteobacteria; D_3__Gammaproteobacteria Incertae Sedis; D_4__Unknown Family; D_5__uncultured; D_6__uncultured gamma proteobacterium	0.046641	0.00237492	0.0342404	0.0100257	0
Otu805	D_0__Bacteria; D_1__Bacteroidetes; D_2__Flavobacteriia; D_3__Flavobacteriales; D_4__Cryomorphaceae; D_5__uncultured	0.0464509	0.000296865	0.000969067	0.00432482	0.0408601
Otu1536	D_0__Bacteria; D_1__Proteobacteria; D_2__Gammaproteobacteria; D_3__Alteromonadales; D_4__Shewanellaceae; D_5__Psychrobium	0.0463582	0.0320615	0.0119518	0.000982913	0.001362
Otu1234	D_0__Bacteria; D_1__Bacteroidetes; D_2__Flavobacteriia; D_3__Flavobacteriales; D_4__Flavobacteriaceae	0.046218	0.00148433	0.00646045	0.00864963	0.0296236
Otu1525	D_0__Bacteria; D_1__Proteobacteria; D_2__Gammaproteobacteria; D_3__Cellvibrionales; D_4__Halieaceae; D_5__Halioglobus	0.0461735	0.000296865	0.0151821	0.0143505	0.016344
Otu1058	D_0__Bacteria; D_1__Nitrospinae; D_2__Nitrospinia; D_3__Nitrospinales; D_4__Nitrospinaceae; D_5__Nitrospina; D_6__uncultured bacterium	0.0459785	0.000296865	0.0387627	0.00589748	0.0010215
Otu705	D_0__Bacteria; D_1__Proteobacteria; D_2__Alphaproteobacteria; D_3__Rhodobacterales; D_4__Rhodobacteraceae; D_5__uncultured	0.0458938	0.000296865	0.00226116	0.0375473	0.00578851
Otu4191	D_0__Bacteria; D_1__Actinobacteria; D_2__Acidimicrobiia; D_3__Acidimicrobiales; D_4__Acidimicrobiaceae; D_5__Ilumatobacter; Ambiguous_taxa	0.0458435	0.00296865	0.028749	0.0114018	0.00272401
Otu1072	D_0__Bacteria; D_1__Proteobacteria; D_2__Gammaproteobacteria; D_3__Alteromonadales; D_4__Pseudoalteromonadaceae; D_5__Pseudoalteromonas	0.0451797	0.00118746	0.00258418	0.01553	0.0258781
Otu784	D_0__Bacteria; D_1__Nitrospinae; D_2__Nitrospinia; D_3__Nitrospinales; D_4__Nitrospinaceae; D_5__Nitrospina	0.0451585	0.000890596	0.043285	0.000982913	0
Otu1090	D_0__Bacteria; D_1__Bacteroidetes; D_2__Flavobacteriia; D_3__Flavobacteriales; D_4__NS9 marine group	0.0451576	0.0216712	0.0103367	0.00157266	0.011577
Otu1735	D_0__Bacteria; D_1__Bacteroidetes; D_2__Flavobacteriia; D_3__Flavobacteriales; D_4__Flavobacteriaceae; D_5__Pibocella	0.0450527	0.00207806	0.0365015	0.00511115	0.001362
Otu865	D_0__Bacteria; D_1__Bacteroidetes; D_2__Flavobacteriia; D_3__Flavobacteriales; D_4__Flavobacteriaceae; D_5__NS3a marine group	0.0450517	0.0249367	0.0193813	0.000393165	0.000340501
Otu1491	D_0__Bacteria	0.045021	0	0.000646045	0.0440345	0.000340501
Otu867	D_0__Bacteria; D_1__Proteobacteria; D_2__Gammaproteobacteria; D_3__KI89A clade	0.044931	0.00118746	0.0200274	0.0169061	0.00681002
Otu1836	D_0__Bacteria; D_1__Bacteroidetes; D_2__Flavobacteriia; D_3__Flavobacteriales; D_4__Flavobacteriaceae	0.0448107	0.00356238	0.0239037	0.00747014	0.00987453
Otu3809	D_0__Bacteria; D_1__Proteobacteria; D_2__Gammaproteobacteria; D_3__Oceanospirillales; D_4__Oceanospirillaceae; D_5__Pseudohongiella	0.0448071	0.0267179	0.0180893	0	0
Otu1436	D_0__Bacteria; D_1__Proteobacteria; D_2__Gammaproteobacteria; D_3__Oceanospirillales; D_4__Alcanivoracaceae; D_5__Kangiella	0.0447711	0.00118746	0.0129209	0.00648723	0.0241756
Otu4394	D_0__Bacteria; D_1__Proteobacteria; D_2__Alphaproteobacteria; D_3__Caulobacterales; D_4__Hyphomonadaceae; D_5__Robiginitomaculum	0.0446175	0.00207806	0.00323022	0.0290942	0.010215
Otu988	D_0__Bacteria; D_1__Proteobacteria; D_2__Alphaproteobacteria; D_3__Rhodospirillales; D_4__Rhodospirillaceae	0.0445386	0.000593731	0.042962	0.000982913	0
Otu999	D_0__Bacteria; D_1__Proteobacteria; D_2__Alphaproteobacteria; D_3__Rhodospirillales; D_4__Rhodospirillaceae; D_5__uncultured	0.0444657	0.010984	0.0155051	0.0121881	0.00578851
Otu617	D_0__Bacteria; D_1__Saccharibacteria; D_2__uncultured bacterium; D_3__uncultured bacterium; D_4__uncultured bacterium; D_5__uncultured bacterium; D_6__uncultured bacterium	0.0443592	0.0103903	0.028426	0.0045214	0.0010215
Otu1924	D_0__Bacteria; D_1__Proteobacteria; D_2__Alphaproteobacteria; D_3__Rhodobacterales; D_4__Rhodobacteraceae	0.0443068	0.00207806	0.0106597	0.0285045	0.00306451
Otu535	D_0__Bacteria; D_1__Bacteroidetes; D_2__Flavobacteriia; D_3__Flavobacteriales; D_4__Flavobacteriaceae	0.0442769	0.00148433	0.00419929	0.0351883	0.00340501
Otu3233	Unassigned	0.0442679	0.00385925	0.00549138	0.00393165	0.0309856
Otu609	D_0__Bacteria; D_1__Proteobacteria; D_2__Deltaproteobacteria; D_3__Myxococcales; D_4__Haliangiaceae; D_5__Haliangium; D_6__uncultured bacterium	0.0442441	0.0142495	0.0258418	0.00176924	0.00238351
Otu754	D_0__Bacteria; D_1__Actinobacteria; D_2__Acidimicrobiia; D_3__Acidimicrobiales; D_4__uncultured; D_5__uncultured bacterium; D_6__uncultured bacterium	0.0439844	0.00356238	0.0161511	0.0235899	0.000681002
Otu4819	D_0__Bacteria; D_1__Proteobacteria; D_2__Gammaproteobacteria; D_3__Oceanospirillales; D_4__Oceanospirillaceae; D_5__Pseudohongiella	0.0438883	0.00534358	0.0374706	0.000393165	0.000681002
Otu1397	D_0__Bacteria; D_1__Proteobacteria; D_2__Gammaproteobacteria; D_3__Cellvibrionales; D_4__Halieaceae; D_5__Halioglobus	0.0438701	0.00178119	0.0313332	0.00530773	0.00544801
Otu1028	D_0__Bacteria; D_1__Bacteroidetes; D_2__Flavobacteriia; D_3__Flavobacteriales; D_4__Flavobacteriaceae; D_5__Pseudofulvibacter; Ambiguous_taxa	0.0437749	0.00653104	0.0274569	0.0057009	0.00408601
Otu1643	D_0__Bacteria; D_1__Proteobacteria; D_2__Gammaproteobacteria; D_3__Vibrionales; D_4__Vibrionaceae; D_5__Photobacterium; Ambiguous_taxa	0.0436885	0.00445298	0.0339174	0.00157266	0.00374551
Otu1450	D_0__Bacteria; D_1__Bacteroidetes; D_2__Flavobacteriia; D_3__Flavobacteriales; D_4__Flavobacteriaceae; D_5__Winogradskyella	0.0436789	0.00207806	0.01389	0.0174959	0.010215
Otu899	D_0__Bacteria; D_1__Proteobacteria; D_2__Gammaproteobacteria; D_3__Arenicellales; D_4__Arenicellaceae; D_5__Arenicella	0.0433676	0.00385925	0.029395	0.00432482	0.00578851
Otu953	D_0__Bacteria; D_1__Bacteroidetes; D_2__Flavobacteriia; D_3__Flavobacteriales; D_4__Flavobacteriaceae; D_5__Lutibacter; Ambiguous_taxa	0.0433487	0.00148433	0.00129209	0.000393165	0.0401791
Otu702	D_0__Bacteria; D_1__Chloroflexi; D_2__Caldilineae; D_3__Caldilineales; D_4__Caldilineaceae; D_5__uncultured	0.0432496	0	0.0245497	0.0163164	0.00238351
Otu1809	D_0__Bacteria; D_1__Proteobacteria; D_2__Gammaproteobacteria; D_3__Cellvibrionales; D_4__Halieaceae; D_5__Halioglobus; D_6__uncultured bacterium	0.0432422	0.000296865	0.014859	0.0114018	0.0166845
Otu964	D_0__Bacteria; D_1__Proteobacteria; D_2__Gammaproteobacteria; D_3__Thiotrichales; D_4__Francisellaceae; D_5__Francisella; Ambiguous_taxa	0.0432097	0.00831223	0.00613743	0.0011795	0.0275806
Otu1124	D_0__Bacteria; D_1__Bacteroidetes; D_2__Flavobacteriia; D_3__Flavobacteriales; D_4__Cryomorphaceae; D_5__uncultured	0.0431848	0.00148433	0.00516836	0.00963255	0.0268996
Otu782	D_0__Bacteria; D_1__Proteobacteria; D_2__Alphaproteobacteria; D_3__Rhodobacterales; D_4__Rhodobacteraceae; D_5__uncultured	0.0431705	0.00148433	0.0184123	0.0212309	0.00204301
Otu1009	D_0__Bacteria; D_1__Proteobacteria; D_2__Epsilonproteobacteria; D_3__Campylobacterales; D_4__Helicobacteraceae; D_5__Sulfurimonas; D_6__uncultured bacterium	0.0426154	0.0151401	0.014213	0.0125813	0.000681002
Otu3213	D_0__Bacteria; D_1__Spirochaetae; D_2__Spirochaetes; D_3__Spirochaetales; D_4__Spirochaetaceae; D_5__Spirochaeta 2; D_6__uncultured marine bacterium	0.042601	0.0145464	0	0.00353849	0.0245161
Otu721	D_0__Bacteria; D_1__Actinobacteria; D_2__Acidimicrobiia; D_3__Acidimicrobiales; D_4__Iamiaceae; D_5__Iamia; Ambiguous_taxa	0.042294	0.00296865	0.00936765	0.0279147	0.00204301
Otu515	D_0__Bacteria; D_1__Firmicutes; D_2__Erysipelotrichia; D_3__Erysipelotrichales; D_4__Erysipelotrichaceae; D_5__Erysipelothrix; D_6__uncultured bacterium	0.0422653	0	0	0.0422653	0
Otu1005	D_0__Bacteria; D_1__Bacteroidetes; D_2__Flavobacteriia; D_3__Flavobacteriales; D_4__Flavobacteriaceae	0.0422513	0.000890596	0.0403778	0.000982913	0
Otu1430	D_0__Bacteria; D_1__Proteobacteria; D_2__Alphaproteobacteria; D_3__Rickettsiales; D_4__SHWN-night2	0.0422228	0.0068279	0.0323022	0.00275216	0.000340501
Otu1256	D_0__Bacteria; D_1__Bacteroidetes; D_2__Flavobacteriia; D_3__Flavobacteriales; D_4__Flavobacteriaceae; D_5__Tenacibaculum; Ambiguous_taxa	0.0421598	0.00207806	0.0352094	0.00078633	0.00408601
Otu4632	D_0__Bacteria; D_1__Bacteroidetes; D_2__Flavobacteriia; D_3__Flavobacteriales; D_4__Flavobacteriaceae	0.0421028	0.00237492	0.0381166	0.000589748	0.0010215
Otu636	D_0__Bacteria; D_1__Proteobacteria; D_2__Deltaproteobacteria; D_3__Myxococcales; D_4__Nannocystaceae; D_5__Nannocystis; D_6__uncultured delta proteobacterium	0.0419105	0.000296865	0.0410239	0.000589748	0
Otu666	D_0__Bacteria; D_1__Saccharibacteria; D_2__uncultured bacterium; D_3__uncultured bacterium; D_4__uncultured bacterium; D_5__uncultured bacterium; D_6__uncultured bacterium	0.041861	0.0077185	0.0190583	0.0147437	0.000340501
Otu787	D_0__Bacteria; D_1__Proteobacteria; D_2__Alphaproteobacteria; D_3__Rhodospirillales; D_4__Rhodospirillaceae; D_5__uncultured	0.0418168	0.00385925	0.0326253	0.00294874	0.00238351
Otu1100	D_0__Bacteria; D_1__Proteobacteria; D_2__Gammaproteobacteria; D_3__Xanthomonadales; D_4__JTB255 marine benthic group	0.0417294	0.00207806	0.0242267	0.0147437	0.000681002
Otu1545	D_0__Bacteria; D_1__Proteobacteria; D_2__Gammaproteobacteria; D_3__Alteromonadales	0.041602	0.0077185	0.00710649	0.011795	0.014982
Otu860	D_0__Bacteria; D_1__Proteobacteria; D_2__Alphaproteobacteria; D_3__Alphaproteobacteria Incertae Sedis; D_4__Unknown Family; D_5__uncultured; D_6__uncultured bacterium	0.04159	0.00118746	0.00710649	0.0261455	0.00715052
Otu1495	D_0__Bacteria; D_1__Proteobacteria; D_2__Gammaproteobacteria; D_3__Cellvibrionales; D_4__Porticoccaceae; D_5__Porticoccus; D_6__uncultured bacterium	0.0415792	0.0252336	0.00613743	0.00884622	0.001362
Otu2202	D_0__Bacteria; D_1__Proteobacteria; D_2__Gammaproteobacteria; D_3__Chromatiales; D_4__Granulosicoccaceae; D_5__Granulosicoccus	0.0415734	0	0.0161511	0.0220173	0.00340501
Otu1380	D_0__Bacteria; D_1__Proteobacteria; D_2__AEGEAN-245; Ambiguous_taxa; Ambiguous_taxa; Ambiguous_taxa; Ambiguous_taxa	0.0414386	0.000890596	0.014536	0.022607	0.00340501
Otu1216	D_0__Bacteria; D_1__Proteobacteria; D_2__Gammaproteobacteria; D_3__Cellvibrionales; D_4__Spongiibacteraceae; D_5__BD1-7 clade; D_6__uncultured marine bacterium	0.0412227	0.00267179	0.0332713	0.00255557	0.00272401
Otu3684	D_0__Bacteria; D_1__Proteobacteria; D_2__Gammaproteobacteria; D_3__Vibrionales; D_4__Vibrionaceae	0.0409553	0.0100934	0.0106597	0.0110086	0.00919352
Otu871	D_0__Bacteria; D_1__Bacteroidetes; D_2__Flavobacteriia; D_3__Flavobacteriales; D_4__Cryomorphaceae; D_5__NS10 marine group	0.040953	0.00385925	0.000646045	0.00137608	0.0350716
Otu1226	D_0__Bacteria; D_1__Proteobacteria; D_2__Alphaproteobacteria	0.0409121	0.00445298	0.0348864	0.00157266	0
Otu1171	D_0__Bacteria; D_1__Proteobacteria; D_2__Deltaproteobacteria; D_3__Myxococcales; D_4__Nannocystaceae; D_5__Nannocystis; Ambiguous_taxa	0.0407896	0.00237492	0.0365015	0.00157266	0.000340501
Otu3715	D_0__Bacteria; D_1__Bacteroidetes; D_2__Flavobacteriia; D_3__Flavobacteriales; D_4__Cryomorphaceae; D_5__Fluviicola; D_6__uncultured bacterium	0.0407605	0.0237492	0.0164741	0.000196583	0.000340501
Otu975	D_0__Bacteria; D_1__Firmicutes; D_2__Bacilli; D_3__Bacillales; D_4__Planococcaceae; D_5__Sporosarcina; D_6__uncultured bacterium	0.0407529	0.000593731	0.000646045	0.0395131	0
Otu855	D_0__Bacteria; D_1__Lentisphaerae; D_2__Lentisphaeria; D_3__Lentisphaerales; D_4__Lentisphaeraceae; D_5__Lentisphaera	0.0406902	0.00118746	0.0355325	0.00294874	0.0010215
Otu1744	D_0__Bacteria; D_1__Spirochaetae; D_2__Spirochaetes; D_3__Spirochaetales; D_4__Spirochaetaceae; D_5__Spirochaeta 2; D_6__uncultured marine bacterium	0.0405655	0	0	0.00923938	0.0313261
Otu2235	D_0__Bacteria; D_1__Proteobacteria; D_2__Gammaproteobacteria; D_3__Oceanospirillales; D_4__Oceanospirillaceae; D_5__Oleispira	0.0404578	0.00593731	0.0310102	0.00078633	0.00272401
Otu986	D_0__Bacteria; D_1__Proteobacteria; D_2__Gammaproteobacteria; D_3__Oceanospirillales; D_4__OM182 clade	0.0403721	0.0234524	0.0155051	0.000393165	0.0010215
Otu806	D_0__Bacteria; D_1__Bacteroidetes; D_2__Flavobacteriia; D_3__Flavobacteriales; D_4__Cryomorphaceae; D_5__uncultured	0.0402065	0.00178119	0.00516836	0.00805989	0.0251971
Otu994	D_0__Bacteria; D_1__Proteobacteria; D_2__Gammaproteobacteria; D_3__Oceanospirillales; D_4__OM182 clade	0.0401761	0.00712477	0.00710649	0.00176924	0.0241756
Otu1382	D_0__Bacteria; D_1__Proteobacteria; D_2__Alphaproteobacteria; D_3__Alphaproteobacteria Incertae Sedis; D_4__uncultured	0.0401481	0.00504671	0.00484534	0.0237865	0.00646952
Otu1893	D_0__Bacteria; D_1__Bacteroidetes; D_2__Flavobacteriia; D_3__Flavobacteriales; D_4__Flavobacteriaceae; D_5__NS5 marine group	0.0401449	0.0246398	0.0155051	0	0
Otu1775	D_0__Bacteria; D_1__Acidobacteria; D_2__Subgroup 26; D_3__uncultured bacterium; D_4__uncultured bacterium; D_5__uncultured bacterium; D_6__uncultured bacterium	0.0400761	0.00504671	0.0303641	0.00432482	0.000340501
Otu2330	D_0__Bacteria; D_1__Bacteroidetes; D_2__Flavobacteriia; D_3__Flavobacteriales; D_4__Flavobacteriaceae; D_5__Maribacter	0.0400425	0.00118746	0.0274569	0.00629064	0.00510751
Otu2107	D_0__Bacteria; D_1__Proteobacteria; D_2__Alphaproteobacteria; D_3__Rhizobiales; D_4__Phyllobacteriaceae	0.0400012	0	0.000646045	0.0383336	0.0010215
Otu1012	D_0__Bacteria; D_1__Firmicutes; D_2__Bacilli; D_3__Bacillales; D_4__Staphylococcaceae; D_5__Jeotgalicoccus	0.0398298	0.0172182	0.0226116	0	0
Otu1418	D_0__Bacteria; D_1__Actinobacteria; D_2__Acidimicrobiia; D_3__Acidimicrobiales; D_4__Sva0996 marine group	0.0397561	0.0228586	0.00969067	0.00550431	0.0017025
Otu1706	D_0__Bacteria; D_1__Actinobacteria; D_2__Acidimicrobiia; D_3__Acidimicrobiales; D_4__OM1 clade; D_5__uncultured bacterium; D_6__uncultured bacterium	0.0396083	0.00504671	0.0255188	0.0090428	0
Otu2734	D_0__Bacteria; D_1__Actinobacteria; D_2__Acidimicrobiia; D_3__Acidimicrobiales; D_4__uncultured; Ambiguous_taxa; Ambiguous_taxa	0.0395027	0.0139527	0.00742952	0.0119915	0.00612902
Otu1150	D_0__Bacteria; D_1__Proteobacteria; D_2__Gammaproteobacteria; D_3__Cellvibrionales; D_4__Halieaceae; D_5__Haliea; D_6__uncultured bacterium	0.0393978	0.00296865	0.0258418	0.0078633	0.00272401
Otu2908	D_0__Bacteria; D_1__Bacteroidetes; D_2__Flavobacteriia; D_3__Flavobacteriales; D_4__Flavobacteriaceae; D_5__Dokdonia; Ambiguous_taxa	0.0393947	0.00178119	0.00129209	0.00805989	0.0282616
Otu3193	D_0__Bacteria; D_1__Proteobacteria; D_2__Alphaproteobacteria	0.0392319	0.00474985	0.000323022	0.00589748	0.0282616
Otu1041	D_0__Bacteria; D_1__Proteobacteria; D_2__Gammaproteobacteria; D_3__Gammaproteobacteria Incertae Sedis; D_4__Unknown Family; D_5__Marinicella; Ambiguous_taxa	0.0391438	0	0.0313332	0.00747014	0.000340501
Otu1008	D_0__Bacteria; D_1__Proteobacteria; D_2__Alphaproteobacteria; D_3__Rhizobiales; D_4__uncultured	0.039077	0.000296865	0.00355325	0.0342054	0.0010215
Otu1509	D_0__Bacteria; D_1__Bacteroidetes; D_2__Flavobacteriia; D_3__Flavobacteriales; D_4__Flavobacteriaceae; D_5__Algitalea; D_6__uncultured bacterium	0.0390669	0.0189994	0.0106597	0.00668381	0.00272401
Otu836	D_0__Bacteria; D_1__Bacteroidetes; D_2__Flavobacteriia; D_3__Flavobacteriales; D_4__Flavobacteriaceae; D_5__Dokdonia; Ambiguous_taxa	0.0390638	0.000593731	0.000969067	0.00923938	0.0282616
Otu814	D_0__Bacteria; D_1__Proteobacteria; D_2__Deltaproteobacteria; D_3__NB1-j; D_4__uncultured bacterium; D_5__uncultured bacterium; D_6__uncultured bacterium	0.0390592	0.00207806	0.0303641	0.00491457	0.0017025
Otu1173	D_0__Bacteria; D_1__Bacteroidetes; D_2__Cytophagia; D_3__Cytophagales; D_4__Flammeovirgaceae; D_5__uncultured; D_6__uncultured bacterium	0.0390259	0.0068279	0.00549138	0.00491457	0.0217921
Otu866	D_0__Bacteria; D_1__Saccharibacteria; D_2__uncultured bacterium; D_3__uncultured bacterium; D_4__uncultured bacterium; D_5__uncultured bacterium; D_6__uncultured bacterium	0.0388015	0.0142495	0.0187353	0.00275216	0.00306451
Otu1415	D_0__Bacteria; D_1__Proteobacteria; D_2__Gammaproteobacteria; D_3__Gammaproteobacteria Incertae Sedis; D_4__Unknown Family; D_5__uncultured; D_6__uncultured bacterium	0.0387752	0.00118746	0.0264878	0.0104189	0.000681002
Otu1674	D_0__Bacteria; D_1__Proteobacteria; D_2__Gammaproteobacteria; D_3__Alteromonadales; D_4__Pseudoalteromonadaceae; D_5__Pseudoalteromonas	0.0387594	0.00178119	0.000969067	0.010812	0.0251971
Otu1145	D_0__Bacteria; D_1__Proteobacteria; D_2__Alphaproteobacteria; D_3__Rhodobacterales; D_4__Rhodobacteraceae; D_5__uncultured; D_6__uncultured marine bacterium	0.0387275	0.0181088	0.0106597	0.00825647	0.0017025
Otu982	D_0__Bacteria; D_1__Firmicutes; D_2__Clostridia; D_3__Clostridiales; D_4__Lachnospiraceae; D_5__uncultured	0.0387268	0	0	0.0387268	0
Otu508	D_0__Bacteria; D_1__Proteobacteria; D_2__Deltaproteobacteria; D_3__Bradymonadales; D_4__uncultured bacterium; D_5__uncultured bacterium; D_6__uncultured bacterium	0.038639	0.000890596	0.0226116	0.0151369	0
Otu4624	D_0__Bacteria; D_1__Proteobacteria; D_2__Gammaproteobacteria; D_3__Alteromonadales; D_4__Alteromonadaceae	0.0385906	0.0192963	0.00613743	0.011795	0.001362
Otu904	D_0__Bacteria; D_1__Proteobacteria; D_2__Deltaproteobacteria; D_3__Myxococcales; D_4__Nannocystaceae	0.0385598	0.00237492	0.0329483	0.00255557	0.000681002
Otu3734	D_0__Bacteria; D_1__Proteobacteria; D_2__Gammaproteobacteria; D_3__Chromatiales; D_4__Granulosicoccaceae; D_5__Granulosicoccus; Ambiguous_taxa	0.0385254	0.00296865	0.000969067	0.0192651	0.0153225
Otu1498	D_0__Bacteria; D_1__Proteobacteria; D_2__Alphaproteobacteria; D_3__Rhodobacterales; D_4__Rhodobacteraceae; D_5__uncultured; D_6__uncultured bacterium	0.0384765	0.000593731	0.0103367	0.0251626	0.00238351
Otu1750	D_0__Bacteria; D_1__Proteobacteria; D_2__Betaproteobacteria; D_3__Neisseriales; D_4__Neisseriaceae; D_5__Deefgea; Ambiguous_taxa	0.0382527	0.00593731	0.0109828	0.0169061	0.00442651
Otu978	D_0__Bacteria; D_1__Proteobacteria; D_2__Gammaproteobacteria; D_3__Oceanospirillales; D_4__Alcanivoracaceae; D_5__Kangiella	0.0381939	0.000890596	0.0113058	0.00216241	0.0238351
Otu1317	D_0__Bacteria; D_1__Proteobacteria; D_2__Gammaproteobacteria; D_3__Alteromonadales; D_4__Shewanellaceae; D_5__Shewanella; Ambiguous_taxa	0.0381872	0.00653104	0.0316562	0	0
Otu509	D_0__Bacteria; D_1__Bacteroidetes; D_2__Flavobacteriia; D_3__Flavobacteriales; D_4__Cryomorphaceae; D_5__Crocinitomix	0.0380721	0.00385925	0.0029072	0.0265387	0.00476701
Otu1429	D_0__Bacteria; D_1__Chloroflexi; D_2__Anaerolineae; D_3__Anaerolineales; D_4__Anaerolineaceae; D_5__uncultured; D_6__uncultured bacterium	0.0377936	0	0.0377936	0	0
Otu3303	D_0__Bacteria; D_1__Proteobacteria; D_2__Alphaproteobacteria; D_3__SAR11 clade; D_4__Surface 1; D_5__uncultured bacterium; D_6__uncultured bacterium	0.0376012	0.00445298	0.000323022	0.00864963	0.0241756
Otu1504	D_0__Bacteria; D_1__Proteobacteria; D_2__Deltaproteobacteria; D_3__Myxococcales; D_4__Nannocystaceae; D_5__uncultured	0.0375326	0.00504671	0.0209965	0.0057009	0.00578851
Otu898	D_0__Bacteria; D_1__Bacteroidetes; D_2__Flavobacteriia; D_3__Flavobacteriales; D_4__Cryomorphaceae; D_5__Crocinitomix; Ambiguous_taxa	0.0373024	0.00623417	0.00710649	0.0123847	0.011577
Otu1269	D_0__Bacteria; D_1__Proteobacteria; D_2__Gammaproteobacteria	0.0371896	0.000593731	0.00161511	0.0196583	0.0153225
Otu4676	D_0__Bacteria; D_1__Proteobacteria; D_2__Gammaproteobacteria; D_3__Oceanospirillales; D_4__Oceanospirillaceae	0.0371615	0.00712477	0.00904463	0.0169061	0.00408601
Otu940	D_0__Bacteria; D_1__Acidobacteria; D_2__Solibacteres; D_3__Solibacterales; D_4__Solibacteraceae (Subgroup 3); D_5__PAUC26f; Ambiguous_taxa	0.0369878	0.000890596	0.0335943	0.00216241	0.000340501
Otu411	D_0__Bacteria; D_1__Actinobacteria; D_2__Acidimicrobiia; D_3__Acidimicrobiales; D_4__Acidimicrobiales Incertae Sedis; D_5__Candidatus Microthrix; D_6__uncultured bacterium	0.0369612	0	0.000646045	0.0359746	0.000340501
Otu1979	D_0__Bacteria; D_1__Proteobacteria; D_2__Betaproteobacteria; D_3__Methylophilales; D_4__Methylophilaceae	0.0369056	0.00474985	0.00549138	0.00078633	0.0258781
Otu2282	D_0__Bacteria; D_1__Proteobacteria; D_2__Gammaproteobacteria	0.0368485	0.000593731	0	0.00629064	0.0299641
Otu2735	D_0__Bacteria; D_1__Saccharibacteria; D_2__uncultured bacterium; D_3__uncultured bacterium; D_4__uncultured bacterium; D_5__uncultured bacterium; D_6__uncultured bacterium	0.0367904	0.0121715	0.0197044	0.00491457	0
Otu809	D_0__Bacteria; D_1__Proteobacteria; D_2__Alphaproteobacteria; D_3__Rhodobacterales; D_4__Rhodobacteraceae; D_5__Labrenzia	0.0367683	0	0.0361785	0.000589748	0
Otu427	Unassigned	0.0366908	0	0.000323022	0.0363678	0
Otu1962	D_0__Bacteria; D_1__Proteobacteria; D_2__Gammaproteobacteria; D_3__Oceanospirillales; D_4__Oceanospirillaceae; D_5__Balneatrix; D_6__uncultured marine bacterium	0.0366186	0.00801537	0.00419929	0.00805989	0.016344
Otu1440	D_0__Bacteria; D_1__Bacteroidetes; D_2__Flavobacteriia; D_3__Flavobacteriales; D_4__Flavobacteriaceae; D_5__uncultured; D_6__uncultured Lutibacter sp.	0.0365367	0.00148433	0.0229346	0.00530773	0.00681002
Otu727	D_0__Bacteria; D_1__Proteobacteria; D_2__Alphaproteobacteria; D_3__Caulobacterales; D_4__Hyphomonadaceae; D_5__uncultured; D_6__uncultured bacterium	0.0363762	0.00890596	0.00710649	0.0172993	0.00306451
Otu1229	D_0__Bacteria; D_1__Proteobacteria; D_2__Alphaproteobacteria; D_3__Parvularculales; D_4__Parvularculaceae	0.0362914	0.000593731	0.0193813	0.0163164	0
Otu3055	D_0__Bacteria; D_1__Bacteroidetes; D_2__Flavobacteriia; D_3__Flavobacteriales; D_4__Flavobacteriaceae	0.0361684	0.0216712	0.0135669	0.000589748	0.000340501
Otu2257	D_0__Bacteria; D_1__Proteobacteria; D_2__Alphaproteobacteria; D_3__Caulobacterales; D_4__Hyphomonadaceae; D_5__Maricaulis; Ambiguous_taxa	0.0361647	0.0136558	0.00193813	0.0137608	0.00681002
Otu2950	D_0__Bacteria; D_1__Proteobacteria; D_2__Gammaproteobacteria; D_3__Alteromonadales; D_4__Colwelliaceae; D_5__Colwellia	0.0361053	0.0148433	0.0151821	0.00471798	0.001362
Otu1129	D_0__Bacteria; D_1__Acidobacteria; D_2__Holophagae; D_3__Subgroup 10; D_4__TK85; D_5__uncultured bacterium; D_6__uncultured bacterium	0.0360797	0.00178119	0.0264878	0.00747014	0.000340501
Otu1684	D_0__Bacteria; D_1__Firmicutes; D_2__Bacilli; D_3__Bacillales; D_4__Staphylococcaceae; D_5__Jeotgalicoccus	0.036032	0.0163276	0.0197044	0	0
Otu530	D_0__Bacteria; D_1__Firmicutes; D_2__Bacilli; D_3__Lactobacillales; D_4__Carnobacteriaceae; D_5__Carnobacterium; Ambiguous_taxa	0.0359938	0.00178119	0.00129209	0.0322395	0.000681002
Otu749	D_0__Bacteria; D_1__Saccharibacteria; D_2__uncultured bacterium; D_3__uncultured bacterium; D_4__uncultured bacterium; D_5__uncultured bacterium; D_6__uncultured bacterium	0.0358952	0.00118746	0.00226116	0.0287011	0.00374551
Otu786	D_0__Bacteria; D_1__Actinobacteria; D_2__Acidimicrobiia; D_3__Acidimicrobiales; D_4__OM1 clade; D_5__uncultured bacterium; D_6__uncultured bacterium	0.0358665	0.00178119	0.0313332	0.00275216	0
Otu1167	D_0__Bacteria; D_1__Acidobacteria; D_2__Subgroup 22; D_3__uncultured bacterium; D_4__uncultured bacterium; D_5__uncultured bacterium; D_6__uncultured bacterium	0.0358081	0.000890596	0.0326253	0.000589748	0.0017025
Otu1161	D_0__Bacteria; D_1__Proteobacteria; D_2__Alphaproteobacteria; D_3__Rickettsiales; D_4__T9d; D_5__uncultured bacterium; D_6__uncultured bacterium	0.0357666	0.0124683	0.0158281	0.00747014	0
Otu1325	D_0__Bacteria; D_1__Proteobacteria; D_2__Gammaproteobacteria; D_3__Alteromonadales; D_4__Alteromonadaceae; D_5__Alteromonas	0.035736	0.0210774	0.0132439	0.000393165	0.0010215
Otu3238	D_0__Bacteria; D_1__Proteobacteria; D_2__Gammaproteobacteria; D_3__Alteromonadales; D_4__Shewanellaceae	0.0356969	0.0178119	0.014859	0.000982913	0.00204301
Otu630	D_0__Bacteria; D_1__Bacteroidetes; D_2__Cytophagia; D_3__Cytophagales; D_4__Flammeovirgaceae; D_5__uncultured; D_6__uncultured sediment bacterium	0.0356924	0.00415612	0.0122749	0.0141539	0.00510751
Otu714	D_0__Bacteria; D_1__Bacteroidetes; D_2__Flavobacteriia; D_3__Flavobacteriales; D_4__Flavobacteriaceae; D_5__Euzebyella	0.0356543	0.000593731	0.028103	0.00491457	0.00204301
Otu4464	D_0__Bacteria; D_1__Bacteroidetes; D_2__Flavobacteriia; D_3__Flavobacteriales; D_4__Flavobacteriaceae	0.0355602	0.0077185	0.0213195	0.000393165	0.00612902
Otu1190	D_0__Bacteria; D_1__Proteobacteria; D_2__Gammaproteobacteria; D_3__Oceanospirillales; D_4__OM182 clade	0.0354823	0.0192963	0.0155051	0	0.000681002
Otu918	D_0__Bacteria; D_1__Firmicutes; D_2__Clostridia; D_3__Clostridiales; D_4__Lachnospiraceae	0.035462	0.0106872	0.00969067	0.0147437	0.000340501
Otu1086	D_0__Bacteria; D_1__Actinobacteria; D_2__Acidimicrobiia; D_3__Acidimicrobiales; D_4__uncultured; D_5__uncultured bacterium; D_6__uncultured bacterium	0.0354429	0.00445298	0.0184123	0.00747014	0.00510751
Otu1191	D_0__Bacteria; D_1__Proteobacteria; D_2__Alphaproteobacteria; D_3__Rhodospirillales; D_4__Rhodospirillaceae; D_5__uncultured	0.0353245	0.0077185	0.0187353	0.00648723	0.00238351
Otu3127	D_0__Bacteria; D_1__Proteobacteria	0.0352934	0.000296865	0.0242267	0.00668381	0.00408601
Otu2161	D_0__Bacteria; D_1__Proteobacteria; D_2__Gammaproteobacteria	0.0352879	0.00178119	0.00129209	0.01553	0.0166845
Otu438	D_0__Bacteria; D_1__Actinobacteria; D_2__Actinobacteria; D_3__Micrococcales; D_4__Dermatophilaceae; D_5__uncultured; D_6__uncultured bacterium	0.0351959	0.000593731	0.000646045	0.0336156	0.000340501
Otu1396	D_0__Bacteria; D_1__Proteobacteria; D_2__Gammaproteobacteria; D_3__Cellvibrionales; D_4__Cellvibrionaceae; D_5__uncultured	0.0351209	0.0231555	0.0100137	0.000589748	0.001362
Otu1885	D_0__Bacteria; D_1__Proteobacteria; D_2__Gammaproteobacteria; D_3__Alteromonadales; D_4__Psychromonadaceae; D_5__Psychromonas; D_6__uncultured bacterium	0.035022	0.0136558	0.0103367	0.00353849	0.00749102
Otu1007	D_0__Bacteria; D_1__Proteobacteria; D_2__Gammaproteobacteria; D_3__BD7-8 marine group; D_4__uncultured marine bacterium; D_5__uncultured marine bacterium; D_6__uncultured marine bacterium	0.0350055	0	0.000969067	0.0176924	0.016344
Otu907	D_0__Bacteria; D_1__Gracilibacteria; D_2__uncultured bacterium; D_3__uncultured bacterium; D_4__uncultured bacterium; D_5__uncultured bacterium; D_6__uncultured bacterium	0.0349329	0.0145464	0.00904463	0.00078633	0.0105555
Otu655	D_0__Bacteria; D_1__Proteobacteria; D_2__Gammaproteobacteria; D_3__Gammaproteobacteria Incertae Sedis; D_4__Unknown Family; D_5__Marinicella; Ambiguous_taxa	0.0348886	0.000296865	0.00129209	0.0312566	0.00204301
Otu2800	D_0__Bacteria; D_1__Proteobacteria; D_2__Gammaproteobacteria; D_3__Alteromonadales; D_4__Alteromonadaceae	0.034827	0.00385925	0.029395	0.00157266	0
Otu1016	D_0__Bacteria; D_1__Proteobacteria; D_2__Gammaproteobacteria; D_3__Cellvibrionales; D_4__Halieaceae; D_5__Halioglobus; D_6__uncultured bacterium	0.0346518	0.000296865	0.0119518	0.0121881	0.010215
Otu2607	D_0__Bacteria; D_1__Proteobacteria; D_2__Gammaproteobacteria; D_3__Chromatiales; D_4__Granulosicoccaceae; D_5__Granulosicoccus	0.0346285	0.00653104	0.00226116	0.0149403	0.010896
Otu1559	D_0__Bacteria; D_1__Proteobacteria; D_2__Gammaproteobacteria; D_3__Cellvibrionales; D_4__Halieaceae; D_5__Halioglobus	0.0344168	0.00474985	0.0203504	0.00727356	0.00204301
Otu2562	D_0__Bacteria; D_1__Bacteroidetes; D_2__Flavobacteriia; D_3__Flavobacteriales; D_4__Flavobacteriaceae; D_5__NS4 marine group	0.0344042	0.00148433	0.000323022	0.000589748	0.0320071
Otu1075	D_0__Bacteria; D_1__Bacteroidetes; D_2__Cytophagia; D_3__Cytophagales; D_4__Flammeovirgaceae	0.0343476	0.00178119	0.0206734	0.00235899	0.00953402
Otu748	Unassigned	0.034235	0.0293897	0.00484534	0	0
Otu920	D_0__Bacteria; D_1__Bacteroidetes; D_2__Flavobacteriia; D_3__Flavobacteriales; D_4__Cryomorphaceae; D_5__NS10 marine group	0.0341867	0.00148433	0.000969067	0.00176924	0.0299641
Otu820	D_0__Bacteria; D_1__Bacteroidetes; D_2__Flavobacteriia; D_3__Flavobacteriales; D_4__Cryomorphaceae; D_5__Fluviicola; Ambiguous_taxa	0.0340202	0.0195931	0.01389	0.000196583	0.000340501
Otu1286	D_0__Bacteria; D_1__Proteobacteria; D_2__Gammaproteobacteria	0.0339663	0.000593731	0.0306871	0.000982913	0.0017025
Otu3574	D_0__Bacteria; D_1__Proteobacteria; D_2__Deltaproteobacteria; D_3__Bradymonadales	0.0339174	0	0.0339174	0	0
Otu4356	D_0__Bacteria; D_1__Proteobacteria; D_2__Alphaproteobacteria	0.0338203	0.000890596	0.0277799	0.00412823	0.0010215
Otu1195	D_0__Bacteria; D_1__Firmicutes; D_2__Bacilli; D_3__Lactobacillales; D_4__Carnobacteriaceae; D_5__uncultured; D_6__uncultured bacterium	0.0337799	0.01989	0.01389	0	0
Otu1865	D_0__Bacteria; D_1__Proteobacteria; D_2__Gammaproteobacteria; D_3__Oceanospirillales; D_4__Oceanospirillaceae; D_5__Oleispira; Ambiguous_taxa	0.0335252	0.00564044	0.0258418	0	0.00204301
Otu1466	D_0__Bacteria; D_1__Proteobacteria; D_2__Gammaproteobacteria; D_3__Alteromonadales; D_4__Alteromonadaceae; D_5__Paraglaciecola; Ambiguous_taxa	0.0334847	0.000890596	0.000646045	0.0275216	0.00442651
Otu922	D_0__Bacteria; D_1__Proteobacteria; D_2__Alphaproteobacteria; D_3__Rhizobiales; D_4__Methylobacteriaceae; D_5__Methylobacterium	0.0334392	0.00296865	0.00161511	0.0247694	0.00408601
Otu3121	D_0__Bacteria; D_1__Actinobacteria; D_2__Acidimicrobiia; D_3__Acidimicrobiales; D_4__Sva0996 marine group	0.0334204	0.00564044	0.0277799	0	0
Otu1980	D_0__Bacteria; D_1__Bacteroidetes; D_2__Flavobacteriia; D_3__Flavobacteriales; D_4__Flavobacteriaceae; D_5__Tenacibaculum; Ambiguous_taxa	0.0333742	0.00474985	0.00452231	0.00707697	0.017025
Otu2154	D_0__Bacteria; D_1__Proteobacteria; D_2__Alphaproteobacteria; D_3__Rhodobacterales; D_4__Rhodobacteraceae	0.0333222	0.0151401	0.00872161	0.00707697	0.00238351
Otu4246	D_0__Bacteria; D_1__Proteobacteria; D_2__Alphaproteobacteria; D_3__Sneathiellales; D_4__Sneathiellaceae; D_5__Sneathiella; D_6__uncultured bacterium	0.0333112	0.00118746	0.00323022	0.00471798	0.0241756
Otu1280	D_0__Bacteria; D_1__Proteobacteria; D_2__Gammaproteobacteria; D_3__E01-9C-26 marine group; D_4__uncultured gamma proteobacterium; D_5__uncultured gamma proteobacterium; D_6__uncultured gamma proteobacterium	0.0332876	0	0.0274569	0.00412823	0.0017025
Otu1355	D_0__Bacteria; D_1__Actinobacteria; D_2__Acidimicrobiia; D_3__Acidimicrobiales; D_4__uncultured	0.0332184	0.00504671	0.00387627	0.0212309	0.00306451
Otu1414	Unassigned	0.0328549	0.00801537	0.00226116	0.00078633	0.0217921
Otu1975	D_0__Bacteria; D_1__Bacteroidetes; D_2__Flavobacteriia; D_3__Flavobacteriales; D_4__Cryomorphaceae; D_5__Crocinitomix; Ambiguous_taxa	0.0328439	0.00504671	0.00969067	0.0106155	0.00749102
Otu2461	D_0__Bacteria; D_1__Proteobacteria; D_2__Alphaproteobacteria; D_3__Rhizobiales; D_4__PS1 clade; Ambiguous_taxa; Ambiguous_taxa	0.0327255	0.000296865	0.000323022	0.00963255	0.0224731
Otu703	D_0__Bacteria; D_1__Proteobacteria; D_2__Alphaproteobacteria; D_3__Rhodospirillales; D_4__Rhodospirillaceae; D_5__AEGEAN-169 marine group; D_6__uncultured bacterium	0.0326739	0.0189994	0.00775254	0.00353849	0.00238351
Otu4453	D_0__Bacteria; D_1__Bacteroidetes; D_2__Bacteroidetes Incertae Sedis; D_3__Order II; D_4__Rhodothermaceae; D_5__uncultured; D_6__uncultured bacterium	0.0326183	0.0124683	0.0187353	0.000393165	0.0010215
Otu2491	D_0__Bacteria; D_1__Bacteroidetes; D_2__Sphingobacteriia; D_3__Sphingobacteriales; D_4__NS11-12 marine group; Ambiguous_taxa; Ambiguous_taxa	0.032605	0.0118746	0.00807556	0.00550431	0.00715052
Otu1282	D_0__Bacteria; D_1__Proteobacteria; D_2__Gammaproteobacteria	0.0325779	0.00356238	0.0274569	0.000196583	0.001362
Otu1897	D_0__Bacteria; D_1__Proteobacteria; D_2__Gammaproteobacteria; D_3__Chromatiales; D_4__Granulosicoccaceae; D_5__Granulosicoccus	0.0324531	0.000593731	0.0125979	0.0141539	0.00510751
Otu933	D_0__Bacteria; D_1__Proteobacteria; D_2__Gammaproteobacteria; D_3__KI89A clade; D_4__uncultured bacterium; D_5__uncultured bacterium; D_6__uncultured bacterium	0.0323993	0.00178119	0.0197044	0.00648723	0.00442651
Otu944	D_0__Bacteria; D_1__Proteobacteria; D_2__Alphaproteobacteria	0.0323522	0.00504671	0.0251958	0.00176924	0.000340501
Otu1156	D_0__Bacteria; D_1__Nitrospinae; D_2__Nitrospinia; D_3__Nitrospinales; D_4__Nitrospinaceae; D_5__Nitrospina	0.0323315	0.000296865	0.028103	0.00393165	0
Otu2168	D_0__Bacteria; D_1__Proteobacteria; D_2__Gammaproteobacteria	0.0323275	0.000593731	0.0167972	0.00982913	0.00510751
Otu2083	D_0__Bacteria; D_1__Proteobacteria; D_2__Alphaproteobacteria; D_3__Rhodobacterales; D_4__Rhodobacteraceae; D_5__uncultured; D_6__uncultured bacterium	0.0321895	0.000890596	0.000646045	0.0292908	0.001362
Otu856	D_0__Bacteria; D_1__Bacteroidetes; D_2__Flavobacteriia; D_3__Flavobacteriales; D_4__Flavobacteriaceae; D_5__Aquimarina; Ambiguous_taxa	0.0321791	0.0151401	0.014536	0.00216241	0.000340501
Otu1587	D_0__Bacteria; D_1__Proteobacteria; D_2__Deltaproteobacteria; D_3__NB1-j; D_4__uncultured bacterium; D_5__uncultured bacterium; D_6__uncultured bacterium	0.0319449	0.000296865	0.0264878	0.000393165	0.00476701
Otu1117	D_0__Bacteria; D_1__Proteobacteria; D_2__Alphaproteobacteria; D_3__Rhizobiales	0.031886	0.000890596	0.0274569	0.00353849	0
Otu1445	D_0__Bacteria; D_1__Proteobacteria; D_2__Gammaproteobacteria; D_3__Arenicellales; D_4__Arenicellaceae; D_5__Arenicella	0.0318079	0.00356238	0.0216425	0.00353849	0.00306451
Otu2801	D_0__Bacteria; D_1__Proteobacteria; D_2__Gammaproteobacteria; D_3__Cellvibrionales; D_4__Porticoccaceae; D_5__SAR92 clade	0.0316678	0.00326552	0.00129209	0.00157266	0.0255376
Otu1864	D_0__Bacteria; D_1__Proteobacteria; D_2__Betaproteobacteria; D_3__Nitrosomonadales; D_4__Nitrosomonadaceae; D_5__Candidatus Branchiomonas; D_6__uncultured marine bacterium	0.0313965	0	0.000646045	0.00078633	0.0299641
Otu1227	D_0__Bacteria; D_1__Proteobacteria; D_2__Gammaproteobacteria; D_3__Alteromonadales; D_4__Pseudoalteromonadaceae; D_5__Pseudoalteromonas	0.0313785	0.00653104	0.0058144	0.00609406	0.012939
Otu3890	D_0__Bacteria; D_1__Proteobacteria; D_2__Gammaproteobacteria; D_3__Alteromonadales; D_4__Psychromonadaceae; D_5__Psychromonas	0.0312844	0.00593731	0.0106597	0.00923938	0.00544801
Otu699	D_0__Bacteria; D_1__Proteobacteria; D_2__Alphaproteobacteria; D_3__Rhodobacterales; D_4__Rhodobacteraceae; D_5__Roseovarius	0.0312163	0.00118746	0.00419929	0.0237865	0.00204301
Otu1618	D_0__Bacteria; D_1__Proteobacteria; D_2__Gammaproteobacteria; D_3__Alteromonadales; D_4__Colwelliaceae; D_5__Colwellia; D_6__uncultured bacterium	0.0311929	0.0192963	0.000646045	0.00137608	0.00987453
Otu1166	D_0__Bacteria; D_1__Proteobacteria; D_2__Gammaproteobacteria; D_3__Gammaproteobacteria Incertae Sedis; D_4__Unknown Family; D_5__Marinicella; Ambiguous_taxa	0.0310994	0.000593731	0.00193813	0.0251626	0.00340501
Otu1096	D_0__Bacteria; D_1__Proteobacteria; D_2__Alphaproteobacteria; D_3__Rhodospirillales; D_4__Rhodospirillaceae; D_5__AEGEAN-169 marine group; D_6__uncultured bacterium	0.0310541	0.0172182	0.00742952	0.0033419	0.00306451
Otu4270	D_0__Bacteria; D_1__Proteobacteria; D_2__Gammaproteobacteria; D_3__Alteromonadales; D_4__Ferrimonadaceae; D_5__Ferrimonas	0.0310432	0.0201868	0.0106597	0.000196583	0
Otu746	D_0__Bacteria; D_1__Proteobacteria; D_2__Deltaproteobacteria; D_3__Bradymonadales; D_4__uncultured bacterium; D_5__uncultured bacterium; D_6__uncultured bacterium	0.0310163	0.00118746	0.0219655	0.0078633	0
Otu950	D_0__Bacteria; D_1__Bacteroidetes; D_2__Cytophagia; D_3__Cytophagales; D_4__Flammeovirgaceae; D_5__uncultured; D_6__uncultured sediment bacterium	0.030966	0.00445298	0.0125979	0.00982913	0.00408601
Otu1693	D_0__Bacteria; D_1__Proteobacteria; D_2__Gammaproteobacteria; D_3__Cellvibrionales; D_4__Porticoccaceae; D_5__SAR92 clade	0.0308865	0.000890596	0.000646045	0.00176924	0.0275806
Otu1670	D_0__Bacteria; D_1__Planctomycetes; D_2__OM190; D_3__uncultured bacterium; D_4__uncultured bacterium; D_5__uncultured bacterium; D_6__uncultured bacterium	0.030849	0.00118746	0.028103	0.000196583	0.001362
Otu1095	D_0__Bacteria; D_1__Proteobacteria; D_2__Deltaproteobacteria; D_3__Myxococcales; D_4__Nannocystaceae; D_5__uncultured	0.0308131	0.00118746	0.00807556	0.00963255	0.0119175
Otu1102	D_0__Bacteria; D_1__Proteobacteria; D_2__Gammaproteobacteria; D_3__uncultured	0.0305352	0.000593731	0.0232576	0.00668381	0
Otu1855	D_0__Bacteria; D_1__Bacteroidetes; D_2__Flavobacteriia; D_3__Flavobacteriales; D_4__Cryomorphaceae	0.0304165	0	0.029395	0	0.0010215
Otu1779	D_0__Bacteria; D_1__Proteobacteria; D_2__Gammaproteobacteria; D_3__Methylococcales; D_4__pLW-20	0.0303931	0.00267179	0.00129209	0.00157266	0.0248566
Otu1298	D_0__Bacteria; D_1__Proteobacteria; D_2__Deltaproteobacteria; D_3__NB1-j; D_4__uncultured delta proteobacterium; D_5__uncultured delta proteobacterium; D_6__uncultured delta proteobacterium	0.0303481	0.000890596	0.0258418	0.00157266	0.00204301
Otu2356	D_0__Bacteria; D_1__Proteobacteria; D_2__Alphaproteobacteria; D_3__Parvularculales; D_4__Parvularculaceae	0.0303118	0.000593731	0.0297181	0	0
Otu1736	D_0__Bacteria; D_1__Proteobacteria; D_2__Gammaproteobacteria; D_3__Cellvibrionales; D_4__Halieaceae; D_5__OM60(NOR5) clade; D_6__uncultured marine bacterium	0.0302817	0.000296865	0.029395	0.000589748	0
Otu1235	D_0__Bacteria; D_1__Proteobacteria; D_2__Gammaproteobacteria; D_3__Oceanospirillales; D_4__Oceanospirillaceae; D_5__Marinomonas; Ambiguous_taxa	0.0302707	0.0201868	0.00969067	0.000393165	0
Otu926	D_0__Bacteria; D_1__Proteobacteria; D_2__Gammaproteobacteria; D_3__Cellvibrionales; D_4__Cellvibrionaceae	0.030262	0.0231555	0.00710649	0	0
Otu1199	D_0__Bacteria; D_1__Firmicutes; D_2__Erysipelotrichia; D_3__Erysipelotrichales; D_4__Erysipelotrichaceae; D_5__Erysipelothrix; D_6__uncultured bacterium	0.0302211	0	0	0.0298806	0.000340501
Otu2533	D_0__Bacteria; D_1__Bacteroidetes; D_2__Flavobacteriia; D_3__Flavobacteriales; D_4__Flavobacteriaceae; D_5__NS3a marine group	0.0301787	0.0189994	0.0109828	0.000196583	0
Otu723	Unassigned	0.0301185	0.000890596	0.00161511	0.0269318	0.000681002
Otu2048	Unassigned	0.030046	0.00267179	0.00226116	0.010812	0.014301
Otu1931	D_0__Bacteria; D_1__Proteobacteria; D_2__Alphaproteobacteria; D_3__Rhodobacterales; D_4__Rhodobacteraceae; D_5__uncultured	0.0299955	0.0124683	0.0161511	0.00137608	0
Otu1880	D_0__Bacteria; D_1__Proteobacteria; D_2__Gammaproteobacteria; D_3__Cellvibrionales; D_4__Spongiibacteraceae; D_5__uncultured; Ambiguous_taxa	0.0299565	0.000593731	0.00936765	0.0145471	0.00544801
Otu1592	D_0__Bacteria; D_1__Proteobacteria; D_2__Gammaproteobacteria; D_3__E01-9C-26 marine group	0.0298913	0.000890596	0.0239037	0.00373507	0.001362
Otu1363	D_0__Bacteria; D_1__Bacteroidetes; D_2__Flavobacteriia; D_3__Flavobacteriales; D_4__Flavobacteriaceae; D_5__Pseudofulvibacter	0.0298038	0.0187025	0.00710649	0.000589748	0.00340501
Otu2175	D_0__Bacteria; D_1__Proteobacteria; D_2__Gammaproteobacteria	0.0297689	0.00267179	0.00258418	0.0139574	0.0105555
Otu1048	D_0__Bacteria; D_1__Proteobacteria; D_2__Gammaproteobacteria; D_3__uncultured	0.0295136	0.00474985	0.0242267	0.000196583	0.000340501
Otu4021	D_0__Bacteria; D_1__Proteobacteria; D_2__Gammaproteobacteria; D_3__Salinisphaerales; D_4__Salinisphaeraceae; D_5__ZD0417 marine group	0.0293786	0.00979656	0.00516836	0.0110086	0.00340501
Otu4001	Unassigned	0.029367	0.00178119	0.00613743	0.0139574	0.00749102
Otu1952	D_0__Bacteria; D_1__Proteobacteria; D_2__Alphaproteobacteria; D_3__Alphaproteobacteria Incertae Sedis; D_4__Unknown Family; D_5__uncultured; D_6__uncultured organism	0.0292805	0.00564044	0.00549138	0.0147437	0.00340501
Otu2859	D_0__Bacteria; D_1__Bacteroidetes; D_2__Flavobacteriia; D_3__Flavobacteriales; D_4__Flavobacteriaceae; D_5__Polaribacter 1	0.0292597	0.00415612	0.00452231	0.0100257	0.0105555
Otu2276	D_0__Bacteria; D_1__Proteobacteria; D_2__Gammaproteobacteria; D_3__Thiotrichales; D_4__Piscirickettsiaceae	0.0291398	0	0.00161511	0.0135642	0.0139605
Otu3591	D_0__Bacteria; D_1__Proteobacteria; D_2__Gammaproteobacteria; D_3__Vibrionales; D_4__Vibrionaceae; D_5__Aliivibrio	0.0291332	0.00712477	0.00936765	0.00412823	0.00851252
Otu981	D_0__Bacteria; D_1__Proteobacteria; D_2__Alphaproteobacteria; D_3__Rhodospirillales; D_4__Rhodospirillaceae; D_5__uncultured; D_6__uncultured bacterium	0.0290895	0	0.028749	0	0.000340501
Otu1248	D_0__Bacteria; D_1__Bacteroidetes; D_2__Flavobacteriia; D_3__Flavobacteriales; D_4__Flavobacteriaceae; D_5__Polaribacter 1	0.0289916	0.00653104	0.00613743	0.00747014	0.00885302
Otu642	D_0__Bacteria; D_1__Proteobacteria; D_2__Gammaproteobacteria; D_3__Gammaproteobacteria Incertae Sedis; D_4__Unknown Family; D_5__Marinicella	0.0289049	0	0.00129209	0.0269318	0.000681002
Otu788	Unassigned	0.0288511	0.00178119	0.0232576	0.00176924	0.00204301
Otu879	D_0__Bacteria; D_1__Proteobacteria; D_2__Gammaproteobacteria; D_3__KI89A clade; D_4__uncultured marine bacterium; D_5__uncultured marine bacterium; D_6__uncultured marine bacterium	0.0287859	0.0145464	0.00742952	0	0.00681002
Otu2524	D_0__Bacteria; D_1__Proteobacteria; D_2__Gammaproteobacteria; D_3__Vibrionales; D_4__Vibrionaceae; D_5__Photobacterium	0.0287625	0.00207806	0.0264878	0.000196583	0
Otu2113	D_0__Bacteria; D_1__Proteobacteria; D_2__Gammaproteobacteria; D_3__Oceanospirillales	0.0287129	0.0100934	0.00323022	0.00176924	0.01362
Otu3811	D_0__Bacteria; D_1__Bacteroidetes; D_2__Flavobacteriia; D_3__Flavobacteriales; D_4__Flavobacteriaceae; D_5__NS5 marine group	0.0286941	0.0100934	0.0132439	0.000589748	0.00476701
Otu649	D_0__Bacteria; D_1__Proteobacteria; D_2__Alphaproteobacteria; D_3__Rhodobacterales; D_4__Rhodobacteraceae; D_5__uncultured	0.0286042	0.00890596	0.00710649	0.00884622	0.00374551
Otu1438	D_0__Bacteria; D_1__Actinobacteria; D_2__Acidimicrobiia; D_3__Acidimicrobiales	0.0285619	0	0.00678347	0.0176924	0.00408601
Otu1322	D_0__Bacteria; D_1__Firmicutes; D_2__Bacilli; D_3__Lactobacillales; D_4__Enterococcaceae; D_5__Enterococcus; Ambiguous_taxa	0.0284604	0.0118746	0.0132439	0.0033419	0
Otu903	D_0__Bacteria; D_1__Proteobacteria; D_2__Gammaproteobacteria; D_3__Cellvibrionales; D_4__Halieaceae; D_5__Haliea	0.0284577	0.000593731	0.0264878	0.00137608	0
Otu977	D_0__Bacteria; D_1__Bacteroidetes; D_2__Flavobacteriia; D_3__Flavobacteriales; D_4__Flavobacteriaceae; D_5__Polaribacter 1	0.028444	0.00712477	0.00419929	0.0045214	0.0125985
Otu1869	D_0__Bacteria; D_1__Proteobacteria; D_2__Gammaproteobacteria; D_3__Oceanospirillales; D_4__Oceanospirillaceae; D_5__Balneatrix; D_6__uncultured marine bacterium	0.0284427	0.000296865	0	0.00294874	0.0251971
Otu1209	D_0__Bacteria; D_1__Proteobacteria; D_2__Deltaproteobacteria; D_3__Bdellovibrionales; D_4__Bdellovibrionaceae; D_5__Bdellovibrio; D_6__uncultured bacterium	0.0283087	0.00564044	0.00839858	0.0112052	0.00306451
Otu1748	D_0__Bacteria; D_1__Bacteroidetes; D_2__Flavobacteriia; D_3__Flavobacteriales; D_4__Flavobacteriaceae; D_5__Gelidibacter	0.028305	0.00237492	0.0113058	0.0125813	0.00204301
Otu1218	D_0__Bacteria; D_1__Acidobacteria; D_2__Solibacteres; D_3__Solibacterales; D_4__Solibacteraceae (Subgroup 3); D_5__PAUC26f; Ambiguous_taxa	0.0283047	0.000296865	0.0264878	0.0011795	0.000340501
Otu1524	D_0__Bacteria; D_1__Bacteroidetes; D_2__Flavobacteriia; D_3__Flavobacteriales; D_4__Cryomorphaceae; D_5__Crocinitomix	0.0282832	0.000890596	0.0058144	0.0123847	0.00919352
Otu2468	D_0__Bacteria; D_1__Proteobacteria; D_2__Alphaproteobacteria; D_3__Rhodospirillales; D_4__Rhodospirillaceae; D_5__uncultured; D_6__uncultured bacterium	0.02825	0.00118746	0.00646045	0.00255557	0.0180465
Otu1114	D_0__Bacteria; D_1__Proteobacteria; D_2__Deltaproteobacteria; D_3__Myxococcales; D_4__Nannocystaceae	0.0282222	0.00326552	0.0235806	0.00137608	0
Otu2164	D_0__Bacteria; D_1__Bacteroidetes; D_2__Flavobacteriia; D_3__Flavobacteriales; D_4__Flavobacteriaceae; D_5__Winogradskyella	0.0281984	0.000296865	0.00516836	0.0159232	0.00681002
Otu912	D_0__Bacteria; D_1__Proteobacteria; D_2__Deltaproteobacteria; D_3__Myxococcales; D_4__Nannocystaceae; D_5__uncultured	0.028103	0	0.028103	0	0
Otu2349	D_0__Bacteria; D_1__Proteobacteria; D_2__Alphaproteobacteria; D_3__Rickettsiales; D_4__MD3-55	0.0280942	0.0068279	0.00323022	0.00373507	0.014301
Otu1484	D_0__Bacteria; D_1__Proteobacteria; D_2__Gammaproteobacteria; D_3__Alteromonadales; D_4__Shewanellaceae; D_5__Shewanella; D_6__uncultured bacterium	0.0279655	0.00445298	0.0171202	0.00196583	0.00442651
Otu1040	D_0__Bacteria; D_1__Proteobacteria; D_2__Gammaproteobacteria; D_3__Cellvibrionales; D_4__Halieaceae; D_5__Halioglobus; D_6__uncultured bacterium	0.027956	0.000296865	0.00387627	0.0186753	0.00510751
Otu2150	D_0__Bacteria; D_1__Proteobacteria; D_2__Alphaproteobacteria; D_3__Rhizobiales; D_4__Hyphomicrobiaceae; D_5__uncultured; D_6__uncultured bacterium	0.0278891	0.00385925	0.0058144	0.0165129	0.0017025
Otu1329	D_0__Bacteria; D_1__Proteobacteria; D_2__Deltaproteobacteria; D_3__Bdellovibrionales; D_4__Bdellovibrionaceae; D_5__OM27 clade; D_6__uncultured bacterium	0.027819	0.00207806	0.0135669	0.010812	0.001362
Otu1328	D_0__Bacteria; D_1__Proteobacteria; D_2__Gammaproteobacteria	0.0277561	0.00207806	0.000323022	0.0011795	0.0241756
Otu971	D_0__Bacteria; D_1__Proteobacteria; D_2__Gammaproteobacteria	0.0277378	0.00178119	0.00387627	0.0186753	0.00340501
Otu955	D_0__Bacteria; D_1__Proteobacteria; D_2__Gammaproteobacteria; D_3__Cellvibrionales; D_4__Porticoccaceae; D_5__Porticoccus; D_6__uncultured bacterium	0.0276996	0.015437	0.00387627	0.00668381	0.0017025
Otu789	D_0__Bacteria; D_1__Proteobacteria; D_2__Alphaproteobacteria; D_3__Caulobacterales; D_4__Hyphomonadaceae; D_5__uncultured; D_6__uncultured bacterium	0.0276192	0.00653104	0.00613743	0.0112052	0.00374551
Otu2673	D_0__Bacteria; D_1__Firmicutes; D_2__Bacilli; D_3__Lactobacillales; D_4__Streptococcaceae; D_5__Streptococcus	0.027559	0.00949969	0.00904463	0.00629064	0.00272401
Otu4737	D_0__Bacteria; D_1__Proteobacteria; D_2__Gammaproteobacteria; D_3__Oceanospirillales; D_4__SAR86 clade; D_5__uncultured bacterium; D_6__uncultured bacterium	0.0275462	0.0175151	0.00969067	0	0.000340501
Otu2796	Unassigned	0.0275118	0.00385925	0	0.0011795	0.0224731
Otu1556	D_0__Bacteria; D_1__Firmicutes; D_2__Clostridia; D_3__Clostridiales; D_4__Lachnospiraceae	0.027504	0.0086091	0.00936765	0.00884622	0.000681002
Otu700	D_0__Bacteria; D_1__Bacteroidetes; D_2__Flavobacteriia; D_3__Flavobacteriales; D_4__Flavobacteriaceae; D_5__Flavobacterium	0.0274929	0.00148433	0.000323022	0.0239831	0.0017025
Otu683	D_0__Bacteria; D_1__Chloroflexi; D_2__Caldilineae; D_3__Caldilineales; D_4__Caldilineaceae; D_5__uncultured; D_6__uncultured bacterium	0.027456	0	0.0229346	0.0045214	0
Otu3862	D_0__Bacteria; D_1__Proteobacteria; D_2__Gammaproteobacteria; D_3__Xanthomonadales; D_4__JTB255 marine benthic group; D_5__uncultured bacterium; D_6__uncultured bacterium	0.0274289	0.000296865	0.0187353	0.00294874	0.00544801
Otu1281	D_0__Bacteria; D_1__Proteobacteria; D_2__Deltaproteobacteria; D_3__Myxococcales; D_4__Nannocystaceae; D_5__Nannocystis; D_6__uncultured delta proteobacterium	0.0274046	0.000593731	0.0268109	0	0
Otu1543	D_0__Bacteria; D_1__Proteobacteria; D_2__Betaproteobacteria; D_3__Nitrosomonadales; D_4__Nitrosomonadaceae; D_5__Candidatus Branchiomonas	0.0273762	0.000296865	0.000646045	0.0257523	0.000681002
Otu4866	D_0__Bacteria; D_1__Proteobacteria; D_2__Deltaproteobacteria; D_3__Bdellovibrionales; D_4__Bdellovibrionaceae; D_5__OM27 clade; D_6__uncultured delta proteobacterium	0.0273654	0	0.0264878	0.000196583	0.000681002
Otu1574	D_0__Bacteria; D_1__Proteobacteria; D_2__Deltaproteobacteria; D_3__Myxococcales; D_4__BIrii41	0.027321	0.00326552	0.0119518	0.00393165	0.00817202
Otu1790	D_0__Bacteria; D_1__Bacteroidetes; D_2__Flavobacteriia; D_3__Flavobacteriales; D_4__Flavobacteriaceae	0.0272701	0.00118746	0.00161511	0.0237865	0.000681002
Otu1076	D_0__Bacteria; D_1__Proteobacteria; D_2__Alphaproteobacteria; D_3__Rhodospirillales; D_4__Rhodospirillaceae	0.0272693	0.00296865	0.00872161	0.010812	0.00476701
Otu4553	D_0__Bacteria; D_1__Proteobacteria; D_2__Alphaproteobacteria; D_3__Alphaproteobacteria Incertae Sedis; D_4__Unknown Family; D_5__uncultured; D_6__uncultured bacterium	0.0272304	0.00237492	0.00936765	0.0114018	0.00408601
Otu1483	D_0__Bacteria; D_1__Proteobacteria; D_2__Gammaproteobacteria; D_3__Alteromonadales; D_4__Colwelliaceae; D_5__Colwellia	0.027179	0.000296865	0.000323022	0	0.0265591
Otu1833	D_0__Bacteria; D_1__Bacteroidetes; D_2__Flavobacteriia; D_3__Flavobacteriales; D_4__Cryomorphaceae; D_5__Fluviicola	0.0271099	0.0189994	0.00742952	0	0.000681002
Otu4265	D_0__Bacteria; D_1__Proteobacteria; D_2__Gammaproteobacteria; D_3__Pseudomonadales; D_4__Moraxellaceae	0.0270812	0.00267179	0.00839858	0.0102223	0.00578851
Otu1423	D_0__Bacteria; D_1__Bacteroidetes; D_2__Flavobacteriia; D_3__Flavobacteriales; D_4__Flavobacteriaceae; D_5__Croceitalea	0.0270385	0.00267179	0.0226116	0.000393165	0.001362
Otu1245	D_0__Bacteria; D_1__Proteobacteria; D_2__Gammaproteobacteria; D_3__Oceanospirillales; D_4__Oceanospirillaceae; D_5__Pseudohongiella; D_6__uncultured gamma proteobacterium	0.0269965	0.0172182	0.00904463	0.000393165	0.000340501
Otu1349	D_0__Bacteria; D_1__Proteobacteria; D_2__Gammaproteobacteria; D_3__Thiotrichales; D_4__Piscirickettsiaceae; D_5__uncultured	0.0269511	0.000296865	0.000323022	0.0110086	0.0153225
Otu1715	D_0__Bacteria; D_1__Proteobacteria; D_2__Betaproteobacteria; D_3__Nitrosomonadales; D_4__Nitrosomonadaceae; D_5__Candidatus Branchiomonas; D_6__uncultured marine bacterium	0.0268646	0	0.000646045	0	0.0262186
Otu1752	D_0__Bacteria; D_1__Bacteroidetes; D_2__Flavobacteriia; D_3__Flavobacteriales; D_4__Cryomorphaceae; D_5__Crocinitomix; Ambiguous_taxa	0.0268562	0.000593731	0.0229346	0.00196583	0.001362
Otu1815	D_0__Bacteria; D_1__Proteobacteria; D_2__Gammaproteobacteria; D_3__Thiotrichales; D_4__Francisellaceae; D_5__Francisella; Ambiguous_taxa	0.0268444	0.00267179	0.00226116	0.00216241	0.0197491
Otu1219	D_0__Bacteria; D_1__Bacteroidetes; D_2__Flavobacteriia; D_3__Flavobacteriales; D_4__Cryomorphaceae; D_5__Fluviicola; Ambiguous_taxa	0.0268304	0.0181088	0.00872161	0	0
Otu2456	D_0__Bacteria; D_1__Proteobacteria; D_2__Deltaproteobacteria; D_3__NB1-j; Ambiguous_taxa; Ambiguous_taxa; Ambiguous_taxa	0.0267127	0.00178119	0.0206734	0.00255557	0.0017025
Otu2942	D_0__Bacteria; D_1__Acidobacteria; D_2__Subgroup 6; D_3__uncultured bacterium; D_4__uncultured bacterium; D_5__uncultured bacterium; D_6__uncultured bacterium	0.0267018	0.00178119	0.0187353	0.00550431	0.000681002
Otu1034	D_0__Bacteria; D_1__Proteobacteria; D_2__Alphaproteobacteria; D_3__Rhodospirillales; D_4__Rhodospirillaceae; D_5__uncultured; D_6__uncultured bacterium	0.0266671	0.000593731	0.0251958	0.000196583	0.000681002
Otu1094	D_0__Bacteria; D_1__Proteobacteria; D_2__Alphaproteobacteria; D_3__Rhodobacterales; D_4__Rhodobacteraceae	0.0265053	0	0.0261648	0	0.000340501
Otu4389	D_0__Bacteria; D_1__Proteobacteria; D_2__Gammaproteobacteria; D_3__Alteromonadales; D_4__Colwelliaceae; D_5__Colwellia; Ambiguous_taxa	0.0264773	0.00178119	0.00355325	0.0078633	0.0132795
Otu1460	D_0__Bacteria; D_1__Proteobacteria; D_2__Gammaproteobacteria; D_3__Vibrionales; D_4__Vibrionaceae; D_5__Catenococcus; D_6__Pseudoalteromonadaceae bacterium PaD1.20b	0.0263964	0	0.0255188	0.000196583	0.000681002
Otu1835	D_0__Bacteria; D_1__Proteobacteria; D_2__Gammaproteobacteria; D_3__Gammaproteobacteria Incertae Sedis; D_4__Unknown Family; D_5__Marinicella; Ambiguous_taxa	0.0263752	0	0.0251958	0.0011795	0
Otu960	Unassigned	0.0263554	0.00445298	0.00516836	0.0143505	0.00238351
Otu1949	D_0__Bacteria; D_1__Proteobacteria; D_2__Betaproteobacteria; D_3__Methylophilales; D_4__Methylophilaceae	0.0262894	0	0	0.0259489	0.000340501
Otu1030	D_0__Bacteria; D_1__Chloroflexi; D_2__Anaerolineae; D_3__Anaerolineales; D_4__Anaerolineaceae; D_5__uncultured; D_6__uncultured bacterium	0.0261387	0.000296865	0.0258418	0	0
Otu887	D_0__Bacteria; D_1__Proteobacteria; D_2__Gammaproteobacteria; D_3__KI89A clade; D_4__uncultured bacterium; D_5__uncultured bacterium; D_6__uncultured bacterium	0.0260591	0.00237492	0.0151821	0.00373507	0.00476701
Otu1196	D_0__Bacteria; D_1__Planctomycetes; D_2__vadinHA49; D_3__uncultured bacterium; D_4__uncultured bacterium; D_5__uncultured bacterium; D_6__uncultured bacterium	0.0259999	0.00712477	0.0161511	0	0.00272401
Otu1538	D_0__Bacteria; D_1__Proteobacteria; D_2__Deltaproteobacteria; D_3__NB1-j; Ambiguous_taxa; Ambiguous_taxa; Ambiguous_taxa	0.0259694	0.000890596	0.0203504	0.000982913	0.00374551
Otu910	D_0__Bacteria; D_1__Proteobacteria; D_2__Alphaproteobacteria; D_3__Rhizobiales	0.0259664	0	0.0171202	0.00884622	0
Otu2095	D_0__Bacteria; D_1__Proteobacteria; D_2__Gammaproteobacteria; D_3__Oceanospirillales; D_4__Oceanospirillaceae; D_5__Marinomonas; Ambiguous_taxa	0.0259533	0.0192963	0.00646045	0.000196583	0
Otu2061	D_0__Bacteria; D_1__Proteobacteria; D_2__Deltaproteobacteria; D_3__Bdellovibrionales; D_4__Bdellovibrionaceae; D_5__Bdellovibrio; D_6__uncultured bacterium	0.0257899	0.00296865	0.00129209	0.0171027	0.00442651
Otu1452	D_0__Bacteria; D_1__Proteobacteria; D_2__Gammaproteobacteria; D_3__Alteromonadales; D_4__Alteromonadaceae; D_5__Alteromonas	0.0257781	0.0139527	0.0116288	0.000196583	0
Otu1551	Unassigned	0.0257658	0.0228586	0.0029072	0	0
Otu1277	D_0__Bacteria; D_1__Proteobacteria; D_2__Deltaproteobacteria; D_3__Myxococcales; D_4__Haliangiaceae; D_5__Haliangium; D_6__uncultured bacterium	0.0257554	0.00831223	0.0174432	0	0
Otu3217	D_0__Bacteria; D_1__Proteobacteria; D_2__Gammaproteobacteria; D_3__Alteromonadales; D_4__Colwelliaceae; D_5__Colwellia; Ambiguous_taxa	0.0256877	0.00474985	0.0100137	0.00275216	0.00817202
Otu1539	D_0__Bacteria; D_1__Firmicutes; D_2__Bacilli; D_3__Lactobacillales; D_4__Carnobacteriaceae; D_5__uncultured; D_6__uncultured bacterium	0.0256386	0.0157339	0.00936765	0.000196583	0.000340501
Otu1115	D_0__Bacteria; D_1__Proteobacteria; D_2__Alphaproteobacteria; D_3__Rhodobacterales; D_4__Rhodobacteraceae; D_5__uncultured; D_6__uncultured bacterium	0.0255456	0.00207806	0.0029072	0.0174959	0.00306451
Otu1073	D_0__Bacteria; D_1__Proteobacteria; D_2__Deltaproteobacteria; D_3__Myxococcales; D_4__Nannocystaceae	0.0255363	0	0.0251958	0	0.000340501
Otu1217	D_0__Bacteria; D_1__Proteobacteria; D_2__Alphaproteobacteria; D_3__Rhodobacterales; D_4__Rhodobacteraceae	0.0253769	0.000890596	0.00678347	0.0139574	0.00374551
Otu1412	D_0__Bacteria; D_1__Bacteroidetes; D_2__Flavobacteriia; D_3__Flavobacteriales; D_4__Flavobacteriaceae; D_5__Tenacibaculum; Ambiguous_taxa	0.0253616	0.00445298	0.00452231	0.00412823	0.012258
Otu2211	D_0__Bacteria; D_1__Proteobacteria; D_2__Gammaproteobacteria; D_3__Alteromonadales; D_4__Pseudoalteromonadaceae; D_5__Pseudoalteromonas	0.0253441	0.00178119	0.00678347	0.0045214	0.012258
Otu1479	D_0__Bacteria; D_1__Proteobacteria; D_2__Gammaproteobacteria; D_3__KI89A clade	0.02534	0.000593731	0.0245497	0.000196583	0
Otu2098	D_0__Bacteria; D_1__Proteobacteria; D_2__Gammaproteobacteria; D_3__Alteromonadales; D_4__Psychromonadaceae; D_5__Psychromonas	0.0253291	0.0151401	0.00872161	0.00078633	0.000681002
Otu3655	D_0__Bacteria; D_1__Proteobacteria; D_2__Alphaproteobacteria; D_3__Sphingomonadales; D_4__Sphingomonadaceae; D_5__Sphingorhabdus	0.0252915	0.00148433	0.0158281	0.00491457	0.00306451
Otu627	D_0__Bacteria; D_1__Firmicutes; D_2__Clostridia; D_3__Clostridiales; D_4__Family XI; D_5__Gottschalkia	0.0251626	0	0	0.0251626	0
Otu1537	D_0__Bacteria; D_1__Proteobacteria; D_2__Deltaproteobacteria; D_3__NB1-j	0.0251145	0.00653104	0.014536	0.000982913	0.00306451
Otu1303	D_0__Bacteria; D_1__Bacteroidetes; D_2__Flavobacteriia; D_3__Flavobacteriales; D_4__Flavobacteriaceae; D_5__uncultured; D_6__uncultured Lutibacter sp.	0.0250717	0.000593731	0.0174432	0.00294874	0.00408601
Otu1046	D_0__Bacteria; D_1__Proteobacteria; D_2__Deltaproteobacteria; D_3__Bdellovibrionales; D_4__Bdellovibrionaceae; D_5__OM27 clade; D_6__uncultured bacterium	0.0250693	0	0.0248727	0.000196583	0
Otu3292	D_0__Bacteria; D_1__Proteobacteria; D_2__Gammaproteobacteria; D_3__Aeromonadales; D_4__Aeromonadaceae; D_5__Aeromonas	0.0250622	0.000296865	0	0.000589748	0.0241756
Otu1353	D_0__Bacteria; D_1__Actinobacteria; D_2__Actinobacteria; D_3__Propionibacteriales; D_4__Nocardioidaceae; D_5__Aeromicrobium	0.0250084	0	0.00161511	0.0233933	0
Otu1168	D_0__Bacteria; D_1__Proteobacteria; D_2__Gammaproteobacteria; D_3__KI89A clade	0.0249984	0.000593731	0.0190583	0.00432482	0.0010215
Otu1645	D_0__Bacteria; D_1__Saccharibacteria; D_2__uncultured bacterium; D_3__uncultured bacterium; D_4__uncultured bacterium; D_5__uncultured bacterium; D_6__uncultured bacterium	0.0249668	0.000593731	0.00193813	0.0200514	0.00238351
Otu744	D_0__Bacteria; D_1__Actinobacteria; D_2__Acidimicrobiia; D_3__Acidimicrobiales; D_4__Acidimicrobiales Incertae Sedis; D_5__Candidatus Microthrix; D_6__uncultured bacterium	0.0249521	0	0.000969067	0.0239831	0
Otu1162	D_0__Bacteria; D_1__Proteobacteria; D_2__Gammaproteobacteria; D_3__Arenicellales; D_4__Arenicellaceae	0.024839	0.00178119	0.00775254	0.0125813	0.00272401
Otu2648	D_0__Bacteria; D_1__Proteobacteria; D_2__Deltaproteobacteria; D_3__NB1-j; D_4__uncultured bacterium; D_5__uncultured bacterium; D_6__uncultured bacterium	0.0247987	0	0.0235806	0.000196583	0.0010215
Otu3572	D_0__Bacteria; D_1__Firmicutes; D_2__Bacilli; D_3__Bacillales; D_4__Bacillaceae	0.0247694	0	0	0.0247694	0
Otu2612	D_0__Bacteria; D_1__Bacteroidetes; D_2__Flavobacteriia; D_3__Flavobacteriales; D_4__Flavobacteriaceae	0.0246879	0.00504671	0.00419929	0.00216241	0.0132795
Otu3049	D_0__Bacteria; D_1__Proteobacteria; D_2__Gammaproteobacteria; D_3__Xanthomonadales; D_4__JTB255 marine benthic group	0.0245658	0	0.0177662	0.00373507	0.00306451
Otu1271	D_0__Bacteria; D_1__Proteobacteria; D_2__Gammaproteobacteria; D_3__Alteromonadales; D_4__Colwelliaceae; D_5__Colwellia; D_6__uncultured bacterium	0.0245626	0.0118746	0.00710649	0.00353849	0.00204301
Otu1605	D_0__Bacteria; D_1__Firmicutes; D_2__Bacilli; D_3__Lactobacillales; D_4__Carnobacteriaceae	0.0245256	0.00534358	0.0058144	0.0133676	0
Otu2101	D_0__Bacteria; D_1__Proteobacteria; D_2__Alphaproteobacteria; D_3__Alphaproteobacteria Incertae Sedis; D_4__Unknown Family; D_5__uncultured; D_6__uncultured bacterium	0.0245212	0.000593731	0.0029072	0.0196583	0.001362
Otu4607	D_0__Bacteria; D_1__Proteobacteria; D_2__Gammaproteobacteria; D_3__Vibrionales; D_4__Vibrionaceae; D_5__Aliivibrio	0.024518	0.00474985	0.00646045	0.00275216	0.0105555
Otu2100	D_0__Bacteria; D_1__Proteobacteria; D_2__Deltaproteobacteria	0.0242687	0.0103903	0.00904463	0.00176924	0.00306451
Otu591	D_0__Bacteria; D_1__Proteobacteria; D_2__Gammaproteobacteria; D_3__Gammaproteobacteria Incertae Sedis; D_4__Unknown Family; D_5__Marinicella	0.024236	0	0.000646045	0.0235899	0
Otu4818	D_0__Bacteria; D_1__Bacteroidetes; D_2__Flavobacteriia; D_3__Flavobacteriales; D_4__Flavobacteriaceae	0.0242258	0.00207806	0.00484534	0.0033419	0.0139605
Otu1139	D_0__Bacteria; D_1__Bacteroidetes; D_2__Cytophagia; D_3__Cytophagales; D_4__Flammeovirgaceae; D_5__uncultured; D_6__uncultured bacterium	0.0241915	0.00385925	0.00161511	0.00373507	0.014982
Otu1136	D_0__Bacteria; D_1__Bacteroidetes; D_2__Bacteroidetes Incertae Sedis; D_3__Order III; D_4__B2706-C7	0.0241836	0.00474985	0.0184123	0	0.0010215
Otu1375	D_0__Bacteria; D_1__Proteobacteria; D_2__Gammaproteobacteria; D_3__Alteromonadales; D_4__Shewanellaceae; D_5__Psychrobium	0.0240806	0.0201868	0.00355325	0	0.000340501
Otu2305	D_0__Bacteria; D_1__Proteobacteria; D_2__Gammaproteobacteria	0.024053	0.00415612	0.000323022	0.0114018	0.00817202
Otu1350	D_0__Bacteria; D_1__Bacteroidetes; D_2__Flavobacteriia; D_3__Flavobacteriales; D_4__Cryomorphaceae; D_5__Fluviicola	0.0240449	0.000890596	0.000969067	0.000393165	0.0217921
Otu2180	D_0__Bacteria; D_1__Proteobacteria; D_2__Alphaproteobacteria; D_3__Alphaproteobacteria Incertae Sedis; D_4__Unknown Family; D_5__uncultured; D_6__uncultured bacterium	0.0239734	0.000890596	0.00969067	0.0110086	0.00238351
Otu1907	D_0__Bacteria; D_1__Proteobacteria; D_2__Deltaproteobacteria; D_3__NB1-j; D_4__uncultured bacterium; D_5__uncultured bacterium; D_6__uncultured bacterium	0.0239224	0.000296865	0.0203504	0.00157266	0.0017025
Otu1088	D_0__Bacteria; D_1__Saccharibacteria; D_2__uncultured bacterium; D_3__uncultured bacterium; D_4__uncultured bacterium; D_5__uncultured bacterium; D_6__uncultured bacterium	0.023911	0.00356238	0.0113058	0.0090428	0
Otu2783	D_0__Bacteria; D_1__Acidobacteria; D_2__Holophagae; D_3__Subgroup 10; D_4__TK85; D_5__uncultured bacterium; D_6__uncultured bacterium	0.023764	0.000296865	0.0177662	0.0057009	0
Otu1327	D_0__Bacteria; D_1__Firmicutes; D_2__Bacilli; D_3__Bacillales; D_4__Staphylococcaceae; D_5__Staphylococcus	0.023764	0.000296865	0.000323022	0.0228036	0.000340501
Otu603	D_0__Bacteria; D_1__Actinobacteria; D_2__Actinobacteria; D_3__Micrococcales; D_4__Dermatophilaceae; D_5__uncultured; D_6__uncultured bacterium	0.0237338	0	0	0.0233933	0.000340501
Otu1183	D_0__Bacteria; D_1__Proteobacteria; D_2__Deltaproteobacteria; D_3__SAR324 clade(Marine group B)	0.0237103	0.0151401	0.00646045	0.00176924	0.000340501
Otu780	D_0__Bacteria; D_1__Bacteroidetes; D_2__Flavobacteriia; D_3__Flavobacteriales; D_4__Cryomorphaceae; D_5__Cryomorpha	0.0236758	0.000593731	0.00678347	0.00982913	0.00646952
Otu1554	D_0__Bacteria; D_1__Bacteroidetes; D_2__Flavobacteriia; D_3__Flavobacteriales; D_4__Flavobacteriaceae; D_5__Eudoraea; Ambiguous_taxa	0.0236492	0.00148433	0.0180893	0.00373507	0.000340501
Otu1050	D_0__Bacteria; D_1__Proteobacteria; D_2__Gammaproteobacteria; D_3__Alteromonadales; D_4__Moritellaceae; D_5__Moritella	0.0236367	0.00267179	0.00387627	0.0157266	0.001362
Otu1206	D_0__Bacteria; D_1__Bacteroidetes; D_2__Flavobacteriia; D_3__Flavobacteriales; D_4__Flavobacteriaceae	0.0235834	0.00207806	0.00419929	0.00845305	0.00885302
Otu1407	D_0__Bacteria; D_1__Proteobacteria; D_2__Gammaproteobacteria; D_3__KI89A clade; D_4__uncultured marine bacterium; D_5__uncultured marine bacterium; D_6__uncultured marine bacterium	0.023582	0.0100934	0.00872161	0	0.00476701
Otu1546	D_0__Bacteria; D_1__Proteobacteria; D_2__Gammaproteobacteria; D_3__Cellvibrionales; D_4__Spongiibacteraceae; D_5__BD1-7 clade	0.0235179	0.0136558	0.00678347	0.00137608	0.0017025
Otu1039	D_0__Bacteria; D_1__Proteobacteria; D_2__Gammaproteobacteria; D_3__Oceanospirillales	0.0233977	0	0.0216425	0.000393165	0.001362
Otu2954	D_0__Bacteria; D_1__Proteobacteria; D_2__Gammaproteobacteria; D_3__Oceanospirillales; D_4__Hahellaceae; D_5__Endozoicomonas; D_6__uncultured Spongiobacter sp.	0.0233249	0.010984	0.00936765	0.000589748	0.00238351
Otu1611	D_0__Bacteria; D_1__Firmicutes; D_2__Negativicutes; D_3__Selenomonadales; D_4__Veillonellaceae	0.0233124	0.0100934	0.0113058	0.00157266	0.000340501
Otu2139	D_0__Bacteria; D_1__Proteobacteria; D_2__Gammaproteobacteria; D_3__Alteromonadales; D_4__Pseudoalteromonadaceae	0.0232406	0.00118746	0.0213195	0.000393165	0.000340501
Otu2495	D_0__Bacteria; D_1__Proteobacteria; D_2__Alphaproteobacteria; D_3__Rhodospirillales; D_4__Rhodospirillaceae; D_5__uncultured	0.02318	0	0.0213195	0.0011795	0.000681002
Otu2214	D_0__Bacteria; D_1__Planctomycetes; D_2__OM190	0.0231443	0.00148433	0.0213195	0	0.000340501
Otu767	D_0__Bacteria; D_1__Firmicutes; D_2__Erysipelotrichia; D_3__Erysipelotrichales; D_4__Erysipelotrichaceae; D_5__Erysipelothrix	0.0231266	0	0.000323022	0.0228036	0
Otu1419	D_0__Bacteria; D_1__Proteobacteria; D_2__Deltaproteobacteria; D_3__NB1-j; D_4__uncultured bacterium; D_5__uncultured bacterium; D_6__uncultured bacterium	0.0231158	0.00207806	0.0171202	0.00255557	0.001362
Otu4871	D_0__Bacteria; D_1__Proteobacteria; D_2__Gammaproteobacteria; D_3__Cellvibrionales; D_4__Cellvibrionaceae; D_5__uncultured	0.023025	0.0139527	0.00710649	0.00196583	0
Otu2216	D_0__Bacteria; D_1__Proteobacteria; D_2__Gammaproteobacteria; D_3__Oceanospirillales; D_4__SUP05 cluster; D_5__uncultured gamma proteobacterium; D_6__uncultured gamma proteobacterium	0.0230028	0.0148433	0.00678347	0.00137608	0
Otu1517	D_0__Bacteria; D_1__Acidobacteria; D_2__Holophagae; D_3__Subgroup 10; D_4__CA002; D_5__uncultured bacterium; D_6__uncultured bacterium	0.0229716	0	0	0.0011795	0.0217921
Otu1514	D_0__Bacteria; D_1__Bacteroidetes; D_2__Sphingobacteriia; D_3__Sphingobacteriales; D_4__NS11-12 marine group	0.0228954	0.00712477	0.00969067	0.00471798	0.001362
Otu2005	D_0__Bacteria; D_1__Proteobacteria; D_2__Gammaproteobacteria; D_3__Oceanospirillales; D_4__Oceanospirillaceae; D_5__Amphritea; Ambiguous_taxa	0.0228361	0.0151401	0.00613743	0.000196583	0.001362
Otu1120	D_0__Bacteria; D_1__Proteobacteria; D_2__Gammaproteobacteria; D_3__Alteromonadales; D_4__Shewanellaceae; D_5__Psychrobium	0.0228012	0.0124683	0.00872161	0.000589748	0.0010215
Otu1505	D_0__Bacteria; D_1__Bacteroidetes; D_2__Flavobacteriia; D_3__Flavobacteriales; D_4__Flavobacteriaceae; D_5__Tenacibaculum; D_6__uncultured bacterium	0.0226988	0.000593731	0.00161511	0.0106155	0.00987453
Otu1698	D_0__Bacteria; D_1__Planctomycetes; D_2__OM190; D_3__uncultured bacterium; D_4__uncultured bacterium; D_5__uncultured bacterium; D_6__uncultured bacterium	0.0226909	0.000890596	0.0206734	0.00078633	0.000340501
Otu1636	D_0__Bacteria; D_1__Acidobacteria; D_2__Holophagae; D_3__Subgroup 10; D_4__TK85; D_5__uncultured bacterium; D_6__uncultured bacterium	0.0226196	0.00356238	0.0135669	0.00412823	0.001362
Otu896	D_0__Bacteria; D_1__Bacteroidetes; D_2__Flavobacteriia; D_3__Flavobacteriales; D_4__Flavobacteriaceae; D_5__uncultured	0.0226146	0.000593731	0.00129209	0.0149403	0.00578851
Otu1172	D_0__Bacteria; D_1__Bacteroidetes; D_2__Flavobacteriia; D_3__Flavobacteriales; D_4__Cryomorphaceae; D_5__Crocinitomix; D_6__uncultured bacterium	0.0225561	0.000296865	0.0167972	0.00137608	0.00408601
Otu3466	D_0__Bacteria; D_1__Proteobacteria; D_2__Gammaproteobacteria; D_3__Chromatiales; D_4__Granulosicoccaceae; D_5__Granulosicoccus; D_6__uncultured gamma proteobacterium	0.0224339	0.00593731	0.00646045	0.00629064	0.00374551
Otu2327	D_0__Bacteria; D_1__Proteobacteria; D_2__Gammaproteobacteria; D_3__Cellvibrionales; D_4__Halieaceae; D_5__OM60(NOR5) clade	0.0222864	0.0068279	0.0113058	0.00176924	0.00238351
Otu1689	D_0__Bacteria; D_1__Proteobacteria; D_2__SPOTSOCT00m83; Ambiguous_taxa; Ambiguous_taxa; Ambiguous_taxa; Ambiguous_taxa	0.0221776	0.00623417	0.0132439	0.00235899	0.000340501
Otu4802	D_0__Bacteria; D_1__Proteobacteria; D_2__Deltaproteobacteria; D_3__NB1-j; D_4__uncultured bacterium; D_5__uncultured bacterium; D_6__uncultured bacterium	0.0221672	0.000890596	0.0177662	0.00078633	0.00272401
Otu4385	D_0__Bacteria; D_1__Bacteroidetes; D_2__Flavobacteriia; D_3__Flavobacteriales; D_4__Flavobacteriaceae; D_5__NS5 marine group	0.022159	0.0124683	0.00969067	0	0
Otu4193	D_0__Bacteria; D_1__Proteobacteria; D_2__Alphaproteobacteria; D_3__SAR11 clade; D_4__Surface 1; D_5__uncultured bacterium; D_6__uncultured bacterium	0.0221325	0.00148433	0.00161511	0.00609406	0.012939
Otu3095	D_0__Bacteria; D_1__Proteobacteria; D_2__Gammaproteobacteria; D_3__Cellvibrionales; D_4__Cellvibrionaceae	0.0221169	0.00385925	0.00193813	0.00235899	0.0139605
Otu972	D_0__Bacteria; D_1__Proteobacteria; D_2__Gammaproteobacteria; D_3__Chromatiales; D_4__Granulosicoccaceae; D_5__Granulosicoccus	0.022092	0.00118746	0.000646045	0.0165129	0.00374551
Otu1278	D_0__Bacteria; D_1__Proteobacteria; D_2__Alphaproteobacteria; D_3__Rhodobacterales; D_4__Rhodobacteraceae; D_5__Paracoccus	0.0220529	0.000296865	0.0100137	0.0114018	0.000340501
Otu2103	D_0__Bacteria; D_1__Proteobacteria; D_2__Gammaproteobacteria; D_3__Cellvibrionales; D_4__Halieaceae; D_5__Halioglobus	0.022049	0	0.00258418	0.00550431	0.0139605
Otu1122	D_0__Bacteria; D_1__Proteobacteria; D_2__Deltaproteobacteria; D_3__Bdellovibrionales; D_4__Bdellovibrionaceae; D_5__OM27 clade; D_6__uncultured bacterium	0.0219707	0.000296865	0.0203504	0.000982913	0.000340501
Otu1244	D_0__Bacteria; D_1__Proteobacteria; D_2__Gammaproteobacteria; D_3__Arenicellales; D_4__Arenicellaceae	0.0219701	0.00385925	0.00355325	0.010812	0.00374551
Otu946	D_0__Bacteria; D_1__Bacteroidetes; D_2__Cytophagia; D_3__Cytophagales; D_4__Flammeovirgaceae; D_5__uncultured; D_6__uncultured bacterium	0.0219655	0	0.0219655	0	0
Otu1926	D_0__Bacteria; D_1__Proteobacteria; D_2__Betaproteobacteria; D_3__Burkholderiales; D_4__Comamonadaceae; D_5__Delftia	0.0218394	0.00474985	0.00452231	0.0112052	0.001362
Otu1686	D_0__Bacteria; D_1__Proteobacteria; D_2__Gammaproteobacteria; D_3__uncultured; Ambiguous_taxa; Ambiguous_taxa; Ambiguous_taxa	0.0218308	0.000890596	0.0203504	0.000589748	0
Otu1260	D_0__Bacteria; D_1__Proteobacteria; D_2__Deltaproteobacteria; D_3__NB1-j; D_4__uncultured bacterium; D_5__uncultured bacterium; D_6__uncultured bacterium	0.02183	0.00118746	0.00775254	0.00471798	0.00817202
Otu1212	D_0__Bacteria; D_1__Proteobacteria; D_2__Gammaproteobacteria; D_3__Oceanospirillales; D_4__Oceanospirillaceae; D_5__Pseudohongiella	0.0217633	0.00356238	0.014859	0.0033419	0
Otu2502	D_0__Bacteria; D_1__Proteobacteria; D_2__Gammaproteobacteria; D_3__Oceanospirillales; D_4__SS1-B-06-26	0.0216821	0.00178119	0.0197044	0.000196583	0
Otu2352	D_0__Bacteria; D_1__Bacteroidetes; D_2__Sphingobacteriia; D_3__Sphingobacteriales; D_4__NS11-12 marine group; Ambiguous_taxa; Ambiguous_taxa	0.0215916	0.00148433	0.0161511	0.00157266	0.00238351
Otu2106	D_0__Bacteria; D_1__Proteobacteria; D_2__Alphaproteobacteria; D_3__Rhodobacterales; D_4__Rhodobacteraceae; D_5__uncultured; D_6__uncultured bacterium	0.0215379	0.00118746	0.0203504	0	0
Otu3073	D_0__Bacteria; D_1__Proteobacteria; D_2__Gammaproteobacteria; D_3__Gammaproteobacteria Incertae Sedis; D_4__Unknown Family; D_5__uncultured; D_6__uncultured bacterium	0.0215299	0.00148433	0.00710649	0	0.012939
Otu2026	D_0__Bacteria; D_1__Acidobacteria; D_2__Subgroup 26; D_3__uncultured bacterium; D_4__uncultured bacterium; D_5__uncultured bacterium; D_6__uncultured bacterium	0.0214736	0	0.0197044	0.00176924	0
Otu1357	D_0__Bacteria; D_1__Firmicutes; D_2__Clostridia; D_3__Halanaerobiales; D_4__ODP1230B8.23	0.0214559	0	0.00161511	0.0184788	0.001362
Otu1842	D_0__Bacteria; D_1__Proteobacteria; D_2__Gammaproteobacteria; D_3__Oceanospirillales; D_4__Alcanivoracaceae; D_5__Kangiella; D_6__uncultured bacterium	0.0214427	0.00178119	0.0161511	0.00078633	0.00272401
Otu1135	D_0__Bacteria; D_1__Chloroflexi; D_2__Caldilineae; D_3__Caldilineales; D_4__Caldilineaceae; D_5__uncultured; D_6__uncultured bacterium	0.0214312	0	0.0180893	0.0033419	0
Otu835	D_0__Bacteria; D_1__Proteobacteria; D_2__Betaproteobacteria; D_3__Nitrosomonadales; D_4__Nitrosomonadaceae; D_5__Candidatus Branchiomonas; D_6__uncultured marine bacterium	0.0214275	0	0	0.0214275	0
Otu1311	D_0__Bacteria; D_1__Proteobacteria; D_2__Gammaproteobacteria	0.0212606	0.010984	0.00807556	0.0011795	0.0010215
Otu1019	D_0__Bacteria; D_1__Bacteroidetes; D_2__Flavobacteriia; D_3__Flavobacteriales; D_4__Cryomorphaceae; D_5__uncultured	0.0212509	0.000296865	0.0193813	0.00157266	0
Otu1144	D_0__Bacteria; D_1__Proteobacteria; D_2__Gammaproteobacteria; D_3__Alteromonadales; D_4__Colwelliaceae; D_5__Colwellia; D_6__uncultured bacterium	0.0212465	0.000296865	0.000323022	0.000196583	0.0204301
Otu4262	D_0__Bacteria; D_1__Proteobacteria; D_2__Alphaproteobacteria; D_3__Rhizobiales; D_4__OCS116 clade; D_5__uncultured bacterium; D_6__uncultured bacterium	0.0212305	0.00356238	0.0029072	0.00216241	0.0125985
Otu2686	D_0__Bacteria; D_1__Bacteroidetes; D_2__Flavobacteriia; D_3__Flavobacteriales; D_4__Flavobacteriaceae; D_5__NS4 marine group	0.0211769	0.00504671	0.00129209	0.000196583	0.0146415
Otu1400	D_0__Bacteria; D_1__Proteobacteria; D_2__Gammaproteobacteria; D_3__Cellvibrionales; D_4__Spongiibacteraceae; D_5__BD1-7 clade	0.0211387	0.0133589	0.00387627	0.0011795	0.00272401
Otu3547	D_0__Bacteria; D_1__Bacteroidetes; D_2__Flavobacteriia; D_3__Flavobacteriales; D_4__Cryomorphaceae; D_5__Crocinitomix; D_6__uncultured bacterium	0.0211384	0.000593731	0.0100137	0.00235899	0.00817202
Otu1310	D_0__Bacteria; D_1__Bacteroidetes; D_2__Bacteroidia; D_3__Bacteroidales; D_4__Marinilabiaceae; D_5__uncultured	0.021077	0.0118746	0.00807556	0.00078633	0.000340501
Otu1917	D_0__Bacteria; D_1__Gracilibacteria; D_2__uncultured bacterium; D_3__uncultured bacterium; D_4__uncultured bacterium; D_5__uncultured bacterium; D_6__uncultured bacterium	0.0210688	0.0118746	0.0029072	0.0011795	0.00510751
Otu2915	D_0__Bacteria; D_1__Proteobacteria; D_2__Betaproteobacteria	0.0210515	0.0086091	0.00775254	0.00196583	0.00272401
Otu1332	D_0__Bacteria; D_1__Proteobacteria; D_2__Alphaproteobacteria; D_3__Rhodospirillales; D_4__Rhodospirillaceae; D_5__uncultured; D_6__uncultured bacterium	0.0210411	0.000296865	0.00646045	0.0125813	0.0017025
Otu1468	D_0__Bacteria; D_1__Proteobacteria; D_2__Gammaproteobacteria; D_3__Cellvibrionales; D_4__Halieaceae	0.020968	0.000296865	0.00969067	0.00825647	0.00272401
Otu877	D_0__Bacteria; D_1__Bacteroidetes; D_2__Flavobacteriia; D_3__Flavobacteriales; D_4__Flavobacteriaceae; D_5__Flavobacterium; Ambiguous_taxa	0.0209195	0.00118746	0.000323022	0.0190685	0.000340501
Otu2275	D_0__Bacteria; D_1__Actinobacteria; D_2__Acidimicrobiia; D_3__Acidimicrobiales; D_4__OM1 clade; D_5__uncultured bacterium; D_6__uncultured bacterium	0.0208974	0.000296865	0.00742952	0.013171	0
Otu3234	D_0__Bacteria; D_1__Proteobacteria; D_2__Alphaproteobacteria; D_3__Rhodobacterales; D_4__Rhodobacteraceae; D_5__uncultured	0.0208454	0.000593731	0.000646045	0.0192651	0.000340501
Otu3604	D_0__Bacteria; D_1__Bacteroidetes; D_2__Flavobacteriia; D_3__Flavobacteriales; D_4__Flavobacteriaceae; D_5__Winogradskyella	0.0208406	0.00178119	0.00775254	0.00688039	0.00442651
Otu645	D_0__Bacteria; D_1__Proteobacteria; D_2__Gammaproteobacteria; D_3__Legionellales; D_4__Legionellaceae; D_5__Legionella	0.0208378	0	0	0.0208378	0
Otu712	D_0__Bacteria; D_1__Firmicutes; D_2__Clostridia; D_3__Clostridiales; D_4__Peptostreptococcaceae; D_5__Peptoclostridium; D_6__uncultured bacterium	0.0208264	0.000296865	0.00323022	0.0172993	0
Otu2002	D_0__Bacteria; D_1__Proteobacteria; D_2__Deltaproteobacteria; D_3__Myxococcales; D_4__Nannocystaceae; D_5__uncultured	0.0207319	0.00207806	0.0151821	0.00176924	0.0017025
Otu1769	D_0__Bacteria; D_1__Proteobacteria; D_2__Gammaproteobacteria; D_3__uncultured	0.0206564	0.00385925	0.0167972	0	0
Otu2171	D_0__Bacteria; D_1__Proteobacteria; D_2__Alphaproteobacteria; D_3__Rhodobacterales; D_4__Rhodobacteraceae; D_5__Albidovulum; D_6__uncultured bacterium	0.0206524	0.000593731	0.0187353	0.000982913	0.000340501
Otu1147	D_0__Bacteria; D_1__Proteobacteria; D_2__Gammaproteobacteria; D_3__KI89A clade	0.0206473	0.000296865	0.0203504	0	0
Otu1881	D_0__Bacteria; D_1__Proteobacteria; D_2__Gammaproteobacteria; D_3__Oceanospirillales; D_4__Hahellaceae; D_5__Endozoicomonas	0.020632	0.0189994	0.00129209	0	0.000340501
Otu1334	D_0__Bacteria; D_1__Proteobacteria; D_2__Gammaproteobacteria; D_3__Alteromonadales; D_4__Pseudoalteromonadaceae; D_5__Pseudoalteromonas; D_6__uncultured bacterium	0.0205677	0.000593731	0.000323022	0.00943597	0.010215
Otu3056	D_0__Bacteria; D_1__Bacteroidetes; D_2__Flavobacteriia; D_3__Flavobacteriales; D_4__Flavobacteriaceae; D_5__Winogradskyella; Ambiguous_taxa	0.020558	0.000593731	0.00323022	0.0143505	0.00238351
Otu2212	D_0__Bacteria; D_1__Proteobacteria; D_2__Gammaproteobacteria; D_3__Arenicellales; D_4__Arenicellaceae; D_5__Arenicella; D_6__uncultured bacterium	0.020509	0.00148433	0.00936765	0.00727356	0.00238351
Otu1717	D_0__Bacteria; D_1__Bacteroidetes; D_2__Flavobacteriia; D_3__Flavobacteriales; D_4__Flavobacteriaceae; D_5__NS5 marine group; Ambiguous_taxa	0.0204571	0.0115778	0.00775254	0.00078633	0.000340501
Otu1027	D_0__Bacteria; D_1__Firmicutes; D_2__Clostridia; D_3__Clostridiales; D_4__Defluviitaleaceae; D_5__Defluviitaleaceae UCG-011; D_6__uncultured bacterium	0.0204387	0.00890596	0.00549138	0.0057009	0.000340501
Otu4796	D_0__Bacteria; D_1__Planctomycetes; D_2__OM190; D_3__uncultured bacterium; D_4__uncultured bacterium; D_5__uncultured bacterium; D_6__uncultured bacterium	0.0204265	0.00237492	0.0058144	0.00747014	0.00476701
Otu1230	D_0__Bacteria; D_1__Bacteroidetes; D_2__Flavobacteriia; D_3__Flavobacteriales; D_4__Flavobacteriaceae; D_5__Flavobacterium; Ambiguous_taxa	0.0203463	0	0.000323022	0.0172993	0.00272401
Otu1565	D_0__Bacteria; D_1__Proteobacteria; D_2__Deltaproteobacteria; D_3__NB1-j; D_4__uncultured bacterium; D_5__uncultured bacterium; D_6__uncultured bacterium	0.0203156	0.000593731	0.0193813	0	0.000340501
Otu1024	D_0__Bacteria; D_1__Proteobacteria; D_2__Deltaproteobacteria; D_3__Bdellovibrionales; D_4__Bdellovibrionaceae; D_5__Bdellovibrio; D_6__uncultured bacterium	0.0202569	0.00237492	0.000323022	0.0141539	0.00340501
Otu1015	D_0__Bacteria	0.0202344	0.0118746	0.00742952	0.000589748	0.000340501
Otu2174	D_0__Bacteria; D_1__Proteobacteria; D_2__Gammaproteobacteria; D_3__Oceanospirillales; D_4__Oceanospirillaceae; D_5__Pseudohongiella; D_6__uncultured gamma proteobacterium	0.0201603	0.0112809	0.00775254	0.00078633	0.000340501
Otu2455	D_0__Bacteria; D_1__Proteobacteria; D_2__Alphaproteobacteria; D_3__Rhizobiales	0.0201556	0	0.0119518	0.0078633	0.000340501
Otu1238	D_0__Bacteria; D_1__Proteobacteria; D_2__Gammaproteobacteria; D_3__Thiotrichales; D_4__Francisellaceae; D_5__Francisella; Ambiguous_taxa	0.0201112	0.000593731	0	0.00589748	0.01362
Otu1963	D_0__Bacteria; D_1__Bacteroidetes; D_2__Flavobacteriia; D_3__Flavobacteriales; D_4__Cryomorphaceae; D_5__uncultured	0.0200675	0.000296865	0.0177662	0.000982913	0.0010215
Otu1623	D_0__Bacteria; D_1__Firmicutes; D_2__Bacilli; D_3__Lactobacillales; D_4__Carnobacteriaceae; D_5__Lacticigenium; D_6__uncultured bacterium	0.0200376	0	0.000969067	0.0190685	0
Otu794	D_0__Bacteria; D_1__Bacteroidetes; D_2__Flavobacteriia; D_3__Flavobacteriales; D_4__Flavobacteriaceae; D_5__uncultured	0.0199951	0	0	0.0145471	0.00544801
Otu1992	D_0__Bacteria; D_1__Proteobacteria; D_2__Alphaproteobacteria; D_3__Rhodospirillales; D_4__Rhodospirillaceae	0.0199858	0.0103903	0.00807556	0.0011795	0.000340501
Otu3628	D_0__Bacteria; D_1__Bacteroidetes; D_2__Flavobacteriia; D_3__Flavobacteriales; D_4__NS9 marine group	0.0199677	0.0103903	0.00549138	0	0.00408601
Otu4214	D_0__Bacteria; D_1__Bacteroidetes; D_2__Flavobacteriia; D_3__Flavobacteriales; D_4__Flavobacteriaceae; D_5__Wenyingzhuangia	0.0198589	0.0130621	0.00387627	0.000196583	0.00272401
Otu1291	D_0__Bacteria; D_1__Proteobacteria; D_2__Gammaproteobacteria; D_3__Pseudomonadales; D_4__Pseudomonadaceae; D_5__Pseudomonas; D_6__uncultured bacterium	0.0198556	0.000593731	0.00193813	0.0149403	0.00238351
Otu1029	D_0__Bacteria; D_1__Firmicutes; D_2__Bacilli; D_3__Bacillales; D_4__Bacillaceae; D_5__Pseudogracilibacillus	0.0198548	0	0	0.0198548	0
Otu1511	D_0__Bacteria; D_1__Proteobacteria; D_2__JTB23	0.0198412	0.000296865	0.00969067	0.00747014	0.00238351
Otu968	D_0__Bacteria; D_1__Bacteroidetes; D_2__Bacteroidetes Incertae Sedis; D_3__Order III; D_4__B2706-C7	0.0197005	0.00267179	0.0161511	0.000196583	0.000681002
Otu1177	D_0__Bacteria; D_1__Firmicutes; D_2__Clostridia; D_3__Clostridiales; D_4__Family XI; D_5__uncultured; D_6__uncultured bacterium	0.0196583	0	0	0.0196583	0
Otu4852	D_0__Bacteria; D_1__Proteobacteria; D_2__Alphaproteobacteria; D_3__Rhodobacterales; D_4__Rhodobacteraceae	0.019612	0.00653104	0.00613743	0.00353849	0.00340501
Otu1598	D_0__Bacteria; D_1__Bacteroidetes; D_2__Flavobacteriia; D_3__Flavobacteriales; D_4__Cryomorphaceae; D_5__Crocinitomix; D_6__uncultured bacterium	0.019535	0	0.0158281	0.000982913	0.00272401
Otu2148	D_0__Bacteria; D_1__Proteobacteria; D_2__Alphaproteobacteria; D_3__Rhodospirillales; D_4__Rhodospirillaceae	0.0194881	0.00890596	0.00872161	0.0011795	0.000681002
Otu2184	D_0__Bacteria; D_1__Actinobacteria; D_2__Acidimicrobiia; D_3__Acidimicrobiales; D_4__uncultured; D_5__uncultured bacterium; D_6__uncultured bacterium	0.0194612	0.0077185	0.00323022	0	0.00851252
Otu2638	D_0__Bacteria; D_1__Proteobacteria; D_2__Gammaproteobacteria; D_3__Thiotrichales; D_4__Francisellaceae; D_5__Francisella; Ambiguous_taxa	0.0194437	0.00564044	0.0029072	0	0.010896
Otu2128	D_0__Bacteria; D_1__Planctomycetes; D_2__Pla3 lineage; Ambiguous_taxa; Ambiguous_taxa; Ambiguous_taxa; Ambiguous_taxa	0.0194266	0.0112809	0.00775254	0.000393165	0
Otu1118	D_0__Bacteria; D_1__Proteobacteria; D_2__Epsilonproteobacteria; D_3__Campylobacterales; D_4__Helicobacteraceae; D_5__Sulfurovum; D_6__uncultured bacterium	0.0194226	0	0	0.00137608	0.0180465
Otu1292	D_0__Bacteria; D_1__Actinobacteria; D_2__Actinobacteria; D_3__Propionibacteriales; D_4__Nocardioidaceae; D_5__Aeromicrobium	0.0193915	0	0.000323022	0.0190685	0
Otu2690	D_0__Bacteria; D_1__Planctomycetes; D_2__Pla3 lineage; Ambiguous_taxa; Ambiguous_taxa; Ambiguous_taxa; Ambiguous_taxa	0.0193826	0.010984	0.00839858	0	0
Otu1552	D_0__Bacteria; D_1__Chloroflexi; D_2__Anaerolineae; D_3__Anaerolineales; D_4__Anaerolineaceae; D_5__uncultured	0.0193813	0	0.0193813	0	0
Otu2411	D_0__Bacteria; D_1__Proteobacteria; D_2__Gammaproteobacteria; D_3__Oceanospirillales; D_4__Oceanospirillaceae; D_5__Balneatrix; D_6__uncultured marine bacterium	0.019363	0.00207806	0.000323022	0.0033419	0.01362
Otu1707	D_0__Bacteria; D_1__Proteobacteria; D_2__Gammaproteobacteria; D_3__Cellvibrionales; D_4__Porticoccaceae	0.019293	0	0.000323022	0.00943597	0.00953402
Otu2771	D_0__Bacteria; D_1__Actinobacteria; D_2__Actinobacteria; D_3__Corynebacteriales; D_4__Nocardiaceae; D_5__Rhodococcus	0.0192687	0	0.000646045	0.0182822	0.000340501
Otu2072	D_0__Bacteria; D_1__Proteobacteria; D_2__Betaproteobacteria; D_3__TRA3-20	0.019208	0.000593731	0.0106597	0.00727356	0.000681002
Otu1474	D_0__Bacteria; D_1__Proteobacteria; D_2__Epsilonproteobacteria; D_3__Campylobacterales; D_4__Helicobacteraceae; D_5__Sulfurovum; D_6__uncultured bacterium	0.0191745	0.00118746	0.000646045	0.00235899	0.014982
Otu2259	D_0__Bacteria; D_1__Proteobacteria; D_2__Alphaproteobacteria; D_3__Rhodobacterales; D_4__Rhodobacteraceae; D_5__uncultured; D_6__uncultured organism	0.0191309	0.00445298	0.00452231	0.00845305	0.0017025
Otu1273	D_0__Bacteria; D_1__Firmicutes; D_2__Clostridia; D_3__Halanaerobiales; D_4__ODP1230B8.23	0.0191256	0.000593731	0.00258418	0.0135642	0.00238351
Otu881	D_0__Bacteria; D_1__Proteobacteria; D_2__Gammaproteobacteria; D_3__Oceanospirillales; D_4__Oceanospirillaceae; D_5__Pseudohongiella	0.0191248	0	0.000646045	0.0184788	0
Otu3732	D_0__Bacteria; D_1__Bacteroidetes; D_2__Bacteroidia; D_3__Bacteroidales; D_4__Marinilabiaceae; D_5__uncultured; D_6__uncultured Bacteroidetes bacterium	0.0190731	0.0103903	0.00775254	0.000589748	0.000340501
Otu1570	D_0__Bacteria; D_1__Proteobacteria; D_2__Deltaproteobacteria; D_3__Bdellovibrionales; D_4__Bdellovibrionaceae; D_5__OM27 clade; D_6__uncultured bacterium	0.0190644	0	0.014859	0.00216241	0.00204301
Otu2722	D_0__Bacteria; D_1__Proteobacteria; D_2__Deltaproteobacteria; D_3__Bdellovibrionales; D_4__Bdellovibrionaceae; D_5__OM27 clade; D_6__uncultured delta proteobacterium	0.0190616	0.00712477	0.00742952	0.00314532	0.001362
Otu2252	D_0__Bacteria; D_1__Proteobacteria; D_2__Gammaproteobacteria; D_3__BD7-8 marine group; D_4__uncultured bacterium; D_5__uncultured bacterium; D_6__uncultured bacterium	0.0190496	0.000296865	0.0184123	0	0.000340501
Otu1600	D_0__Bacteria; D_1__Proteobacteria; D_2__Gammaproteobacteria; D_3__Chromatiales; D_4__Granulosicoccaceae; D_5__Granulosicoccus	0.0190451	0.00148433	0.00904463	0.00511115	0.00340501
Otu3516	D_0__Bacteria; D_1__Bacteroidetes; D_2__Flavobacteriia; D_3__Flavobacteriales; D_4__Cryomorphaceae; D_5__Crocinitomix	0.0190448	0.000890596	0.00969067	0.00471798	0.00374551
Otu1541	D_0__Bacteria; D_1__Proteobacteria; D_2__Gammaproteobacteria; D_3__EC3; D_4__uncultured bacterium; D_5__uncultured bacterium; D_6__uncultured bacterium	0.0189624	0.000890596	0.000969067	0.0171027	0
Otu2552	D_0__Bacteria; D_1__Proteobacteria; D_2__Gammaproteobacteria; D_3__BD7-8 marine group; D_4__uncultured bacterium; D_5__uncultured bacterium; D_6__uncultured bacterium	0.0189494	0	0.0184123	0.000196583	0.000340501
Otu1716	D_0__Bacteria; D_1__Bacteroidetes; D_2__Flavobacteriia; D_3__Flavobacteriales; D_4__Flavobacteriaceae; D_5__NS5 marine group; Ambiguous_taxa	0.0189458	0.0086091	0.0103367	0	0
Otu1179	D_0__Bacteria; D_1__Proteobacteria; D_2__Gammaproteobacteria; D_3__Xanthomonadales	0.0189195	0.000296865	0	0.0182822	0.000340501
Otu967	D_0__Bacteria; D_1__Firmicutes; D_2__Bacilli; D_3__Lactobacillales; D_4__Carnobacteriaceae	0.0188888	0.00237492	0.00452231	0.0119915	0
Otu1544	D_0__Bacteria; D_1__Proteobacteria; D_2__Gammaproteobacteria; D_3__uncultured	0.0188708	0	0.0119518	0.00589748	0.0010215
Otu2111	D_0__Bacteria; D_1__Bacteroidetes; D_2__Flavobacteriia; D_3__Flavobacteriales; D_4__Cryomorphaceae; D_5__Fluviicola	0.0188064	0.0103903	0.00807556	0	0.000340501
Otu892	D_0__Bacteria; D_1__Bacteroidetes; D_2__Flavobacteriia; D_3__Flavobacteriales; D_4__Flavobacteriaceae	0.0188012	0.000890596	0.0029072	0.0115984	0.00340501
Otu2378	D_0__Bacteria; D_1__Proteobacteria; D_2__Alphaproteobacteria; D_3__Rhodospirillales; D_4__Rhodospirillaceae; D_5__Magnetospira; D_6__uncultured alpha proteobacterium	0.0187663	0.00207806	0.0161511	0.000196583	0.000340501
Otu1488	D_0__Bacteria; D_1__Proteobacteria; D_2__Gammaproteobacteria; D_3__Gammaproteobacteria Incertae Sedis; D_4__Unknown Family; D_5__uncultured	0.0187561	0.000296865	0.00775254	0.0100257	0.000681002
Otu1119	D_0__Bacteria; D_1__Bacteroidetes; D_2__Flavobacteriia; D_3__Flavobacteriales; D_4__Cryomorphaceae	0.0187353	0	0.0187353	0	0
Otu4017	D_0__Bacteria; D_1__Acidobacteria; D_2__Holophagae; D_3__Subgroup 10; D_4__Sva0725	0.0187221	0.000296865	0.0129209	0.00550431	0
Otu1829	D_0__Bacteria; D_1__Proteobacteria; D_2__Gammaproteobacteria; D_3__Arenicellales; D_4__Arenicellaceae; D_5__Arenicella; D_6__uncultured bacterium	0.0187129	0.000593731	0.0103367	0.00471798	0.00306451
Otu1475	D_0__Bacteria; D_1__Proteobacteria; D_2__Gammaproteobacteria; D_3__Alteromonadales; D_4__Shewanellaceae; D_5__Shewanella; Ambiguous_taxa	0.018683	0.000593731	0.0180893	0	0
Otu1801	D_0__Bacteria; D_1__Proteobacteria; D_2__Deltaproteobacteria; D_3__Myxococcales; D_4__BIrii41	0.018646	0.00326552	0.00742952	0.00216241	0.00578851
Otu1188	D_0__Bacteria; D_1__Proteobacteria; D_2__Alphaproteobacteria; D_3__Rhizobiales; D_4__Hyphomicrobiaceae; D_5__uncultured; D_6__uncultured bacterium	0.0186112	0.00712477	0.00226116	0.0078633	0.001362
Otu1622	D_0__Bacteria; D_1__Firmicutes; D_2__Bacilli; D_3__Bacillales; D_4__Planococcaceae; D_5__Planomicrobium	0.0185899	0.000296865	0.00193813	0.0153334	0.0010215
Otu1107	D_0__Bacteria; D_1__Proteobacteria; D_2__Alphaproteobacteria; D_3__Rhizobiales; D_4__Phyllobacteriaceae	0.0185405	0	0.0103367	0.0078633	0.000340501
Otu1749	D_0__Bacteria; D_1__Actinobacteria; D_2__Acidimicrobiia; D_3__Acidimicrobiales; D_4__Acidimicrobiaceae; D_5__uncultured; D_6__uncultured bacterium	0.0185182	0.00178119	0.014536	0.0011795	0.0010215
Otu1603	D_0__Bacteria; D_1__Lentisphaerae; D_2__Oligosphaeria; D_3__P.palmC41; D_4__uncultured bacterium; D_5__uncultured bacterium; D_6__uncultured bacterium	0.0185087	0.00801537	0.00387627	0.00491457	0.0017025
Otu2519	D_0__Bacteria; D_1__Proteobacteria; D_2__Alphaproteobacteria; D_3__Rhodospirillales; D_4__Rhodospirillaceae; D_5__uncultured; D_6__uncultured bacterium	0.0185064	0.00445298	0.00678347	0.00216241	0.00510751
Otu3025	D_0__Bacteria; D_1__Proteobacteria; D_2__Deltaproteobacteria; D_3__NB1-j	0.0184963	0	0.0171202	0.00137608	0
Otu1751	D_0__Bacteria; D_1__Firmicutes; D_2__Bacilli; D_3__Bacillales; D_4__Staphylococcaceae; D_5__Staphylococcus	0.0184562	0.000296865	0.000323022	0.0174959	0.000340501
Otu2841	D_0__Bacteria; D_1__Proteobacteria; D_2__Alphaproteobacteria; D_3__Rhodobacterales; D_4__Rhodobacteraceae; D_5__Sulfitobacter; D_6__uncultured marine bacterium	0.0184496	0.0100934	0.00678347	0.00157266	0
Otu2254	D_0__Bacteria; D_1__Proteobacteria; D_2__Gammaproteobacteria; D_3__Oceanospirillales; D_4__Oceanospirillaceae; D_5__Marinomonas	0.0184488	0.0142495	0.00419929	0	0
Otu949	D_0__Bacteria; D_1__Proteobacteria; D_2__Alphaproteobacteria; D_3__Kordiimonadales; D_4__Kordiimonadaceae; D_5__Kordiimonas; D_6__uncultured bacterium	0.0184401	0.000593731	0.014859	0.00196583	0.0010215
Otu1597	D_0__Bacteria; D_1__Proteobacteria; D_2__Gammaproteobacteria; D_3__Thiotrichales; D_4__Thiotrichales Incertae Sedis; D_5__Caedibacter	0.0184349	0.000296865	0.000323022	0.00589748	0.0119175
Otu1730	D_0__Bacteria; D_1__Proteobacteria; D_2__Gammaproteobacteria; D_3__Oceanospirillales; D_4__Oceanospirillaceae; D_5__Pseudohongiella	0.0184037	0.000890596	0.0161511	0	0.001362
Otu2196	D_0__Bacteria; D_1__Proteobacteria; D_2__Gammaproteobacteria; D_3__Arenicellales; D_4__Arenicellaceae; D_5__Arenicella	0.018365	0.00178119	0.00387627	0.00589748	0.00681002
Otu2110	D_0__Bacteria; D_1__Proteobacteria; D_2__Gammaproteobacteria	0.0182914	0.00326552	0.00678347	0.00688039	0.001362
Otu1284	D_0__Bacteria; D_1__Proteobacteria; D_2__Alphaproteobacteria; D_3__Rhodobacterales; D_4__Rhodobacteraceae; D_5__Pseudovibrio; Ambiguous_taxa	0.0182822	0	0	0.0182822	0
Otu1202	D_0__Bacteria; D_1__Proteobacteria; D_2__Deltaproteobacteria; D_3__Myxococcales; D_4__Nannocystaceae; D_5__uncultured	0.0180893	0	0.0180893	0	0
Otu1854	D_0__Bacteria; D_1__Bacteroidetes; D_2__Flavobacteriia; D_3__Flavobacteriales; D_4__Flavobacteriaceae; D_5__Flavobacterium; Ambiguous_taxa	0.0180759	0.00118746	0.000646045	0.00432482	0.0119175
Otu2177	D_0__Bacteria; D_1__Actinobacteria; D_2__Actinobacteria; D_3__Corynebacteriales; D_4__Corynebacteriaceae; D_5__Corynebacterium 1	0.0180617	0.00148433	0.00710649	0.0033419	0.00612902
Otu1377	D_0__Bacteria; D_1__Bacteroidetes; D_2__Flavobacteriia; D_3__Flavobacteriales; D_4__Flavobacteriaceae; D_5__Algitalea; D_6__uncultured bacterium	0.018043	0.00356238	0.00226116	0.000982913	0.0112365
Otu1655	D_0__Bacteria; D_1__Bacteroidetes; D_2__Flavobacteriia; D_3__Flavobacteriales; D_4__Cryomorphaceae; D_5__Cryomorpha; D_6__uncultured bacterium	0.0178901	0.000593731	0.00355325	0.00727356	0.00646952
Otu3143	D_0__Bacteria; D_1__Firmicutes; D_2__Clostridia; D_3__Halanaerobiales; D_4__ODP1230B8.23; D_5__uncultured bacterium; D_6__uncultured bacterium	0.0178814	0.000890596	0.00226116	0.0133676	0.001362
Otu1694	D_0__Bacteria; D_1__Proteobacteria; D_2__Gammaproteobacteria; D_3__Cellvibrionales; D_4__Porticoccaceae; D_5__SAR92 clade	0.0178728	0.00178119	0.00129209	0.0011795	0.01362
Otu943	D_0__Bacteria; D_1__Proteobacteria; D_2__Alphaproteobacteria; D_3__Rhodobacterales; D_4__Rhodobacteraceae; D_5__Roseobacter clade CHAB-I-5 lineage	0.017848	0.00118746	0.000646045	0.0153334	0.000681002
Otu1746	Unassigned	0.017822	0	0.000323022	0.00353849	0.0139605
Otu2099	D_0__Bacteria; D_1__Proteobacteria; D_2__Gammaproteobacteria; D_3__Alteromonadales	0.0178198	0.0103903	0.00742952	0	0
Otu1612	D_0__Bacteria; D_1__Proteobacteria; D_2__Deltaproteobacteria; D_3__NB1-j; D_4__uncultured bacterium; D_5__uncultured bacterium; D_6__uncultured bacterium	0.017775	0.000296865	0.0167972	0	0.000681002
Otu3520	D_0__Bacteria; D_1__Bacteroidetes; D_2__Sphingobacteriia; D_3__Sphingobacteriales; D_4__NS11-12 marine group; Ambiguous_taxa; Ambiguous_taxa	0.0177395	0.00593731	0.00193813	0.00373507	0.00612902
Otu1321	D_0__Bacteria; D_1__Bacteroidetes; D_2__Flavobacteriia; D_3__Flavobacteriales; D_4__Flavobacteriaceae; D_5__Flavobacterium; Ambiguous_taxa	0.017726	0.000296865	0	0.0157266	0.0017025
Otu1807	D_0__Bacteria; D_1__Bacteroidetes; D_2__Bacteroidia; D_3__Bacteroidales; D_4__Prolixibacteraceae; D_5__Prolixibacter; D_6__uncultured bacterium	0.0177243	0.0151401	0.00258418	0	0
Otu1675	D_0__Bacteria; D_1__Firmicutes; D_2__Clostridia; D_3__Clostridiales; D_4__Lachnospiraceae; D_5__Blautia; D_6__uncultured bacterium	0.0176983	0.00653104	0.00355325	0.00727356	0.000340501
Otu4627	D_0__Bacteria; D_1__Actinobacteria; D_2__Acidimicrobiia; D_3__Acidimicrobiales; D_4__uncultured	0.0176622	0.00148433	0.00969067	0.00648723	0
Otu4283	D_0__Bacteria; D_1__Proteobacteria; D_2__Alphaproteobacteria; D_3__Rhizobiales; D_4__Phyllobacteriaceae; D_5__uncultured; Ambiguous_taxa	0.017635	0.00237492	0.00226116	0.0106155	0.00238351
Otu932	Unassigned	0.0176136	0.000296865	0.0171202	0.000196583	0
Otu2761	D_0__Bacteria; D_1__Bacteroidetes; D_2__Flavobacteriia; D_3__Flavobacteriales; D_4__Flavobacteriaceae; D_5__Flavicella	0.0174755	0.00623417	0.00549138	0.000982913	0.00476701
Otu1231	D_0__Bacteria; D_1__Firmicutes; D_2__Bacilli; D_3__Lactobacillales; D_4__Carnobacteriaceae; D_5__Trichococcus; D_6__uncultured bacterium	0.0174662	0.00356238	0.0129209	0.000982913	0
Otu1681	D_0__Bacteria; D_1__Bacteroidetes; D_2__Flavobacteriia; D_3__Flavobacteriales; D_4__Flavobacteriaceae; D_5__Polaribacter 1	0.0174656	0.00178119	0.000646045	0.00550431	0.00953402
Otu2428	D_0__Bacteria; D_1__Planctomycetes; D_2__OM190; D_3__uncultured bacterium; D_4__uncultured bacterium; D_5__uncultured bacterium; D_6__uncultured bacterium	0.0174432	0	0.0174432	0	0
Otu2267	D_0__Bacteria; D_1__Bacteroidetes; D_2__Flavobacteriia; D_3__Flavobacteriales; D_4__Flavobacteriaceae; D_5__Polaribacter 1	0.0173602	0.00178119	0.000646045	0.00471798	0.010215
Otu1948	D_0__Bacteria; D_1__Proteobacteria; D_2__Gammaproteobacteria; D_3__Chromatiales; D_4__Granulosicoccaceae; D_5__Granulosicoccus	0.0173524	0	0.00323022	0.00629064	0.00783152
Otu1178	Unassigned	0.0173204	0	0.000323022	0.0163164	0.000681002
Otu4122	D_0__Bacteria; D_1__Planctomycetes; D_2__Pla4 lineage	0.0173168	0	0.0171202	0.000196583	0
Otu1650	D_0__Bacteria; D_1__Proteobacteria; D_2__Alphaproteobacteria; D_3__Rhodospirillales; D_4__Rhodospirillaceae; D_5__Magnetospira; D_6__uncultured alpha proteobacterium	0.0172601	0.00207806	0.0151821	0	0
Otu2383	D_0__Bacteria; D_1__Proteobacteria; D_2__Alphaproteobacteria	0.0172436	0.00979656	0.00710649	0	0.000340501
Otu2740	D_0__Bacteria; D_1__Bacteroidetes; D_2__Flavobacteriia; D_3__Flavobacteriales; D_4__Flavobacteriaceae; D_5__NS5 marine group	0.017235	0.00920283	0.00258418	0	0.00544801
Otu4002	D_0__Bacteria; D_1__Proteobacteria; D_2__Alphaproteobacteria; D_3__Sphingomonadales; D_4__Sphingomonadaceae; D_5__Sphingomonas; D_6__uncultured bacterium	0.0172229	0.000890596	0.00969067	0.00255557	0.00408601
Otu1233	D_0__Bacteria; D_1__Actinobacteria; D_2__Actinobacteria; D_3__Micrococcales; D_4__Micrococcaceae; D_5__Arthrobacter	0.0171939	0	0	0.0165129	0.000681002
Otu2230	D_0__Bacteria; D_1__Bacteroidetes; D_2__Flavobacteriia; D_3__Flavobacteriales; D_4__Flavobacteriaceae	0.0171888	0.00326552	0.0058144	0.0033419	0.00476701
Otu1922	D_0__Bacteria; D_1__Bacteroidetes; D_2__Flavobacteriia; D_3__Flavobacteriales; D_4__Flavobacteriaceae	0.0171442	0.00920283	0.00452231	0.00137608	0.00204301
Otu4493	D_0__Bacteria; D_1__Bacteroidetes; D_2__Flavobacteriia; D_3__Flavobacteriales; D_4__Flavobacteriaceae	0.0171123	0.00742163	0.00969067	0	0
Otu3194	D_0__Bacteria; D_1__Bacteroidetes; D_2__Sphingobacteriia; D_3__Sphingobacteriales; D_4__uncultured; D_5__uncultured Bacteroidetes bacterium; D_6__uncultured Bacteroidetes bacterium	0.0171051	0.00445298	0.00387627	0.00196583	0.00681002
Otu1348	D_0__Bacteria; D_1__Nitrospinae; D_2__Nitrospinia; D_3__Nitrospinales; D_4__Nitrospinaceae; D_5__Nitrospina	0.0170245	0.00296865	0.00129209	0.0114018	0.001362
Otu4769	D_0__Bacteria; D_1__Planctomycetes; D_2__OM190	0.0170069	0.00148433	0.0151821	0	0.000340501
Otu1365	D_0__Bacteria; D_1__Bacteroidetes; D_2__Sphingobacteriia; D_3__Sphingobacteriales; D_4__NS11-12 marine group; Ambiguous_taxa; Ambiguous_taxa	0.0169646	0.00801537	0.00646045	0.00078633	0.0017025
Otu2477	D_0__Bacteria; D_1__Proteobacteria; D_2__Alphaproteobacteria; D_3__Rhizobiales; D_4__PS1 clade	0.0169479	0	0	0.00196583	0.014982
Otu984	D_0__Bacteria; D_1__Proteobacteria; D_2__Alphaproteobacteria	0.0167972	0	0.0167972	0	0
Otu1602	D_0__Bacteria; D_1__Proteobacteria; D_2__Alphaproteobacteria; D_3__Rhodospirillales; D_4__Rhodospirillaceae; D_5__uncultured	0.0167111	0.00415612	0.00904463	0.00078633	0.00272401
Otu2823	D_0__Bacteria; D_1__Bacteroidetes; D_2__Flavobacteriia; D_3__Flavobacteriales; D_4__Cryomorphaceae; D_5__uncultured; D_6__uncultured bacterium	0.0166728	0.00118746	0.00484534	0.00825647	0.00238351
Otu1401	D_0__Bacteria; D_1__Proteobacteria; D_2__Alphaproteobacteria; D_3__Rickettsiales; D_4__LWSR-14; Ambiguous_taxa; Ambiguous_taxa	0.0166726	0.00593731	0.00258418	0.00747014	0.000681002
Otu1427	D_0__Bacteria; D_1__Proteobacteria; D_2__Alphaproteobacteria; D_3__Kordiimonadales; D_4__Kordiimonadaceae; D_5__Kordiimonas; D_6__uncultured bacterium	0.0166636	0.000593731	0.0135669	0.00216241	0.000340501
Otu1969	D_0__Bacteria; D_1__Proteobacteria; D_2__Gammaproteobacteria; D_3__Alteromonadales; D_4__Psychromonadaceae; D_5__Psychromonas; D_6__uncultured bacterium	0.0166551	0.00237492	0.000646045	0.00137608	0.012258
Otu969	D_0__Bacteria; D_1__Saccharibacteria; D_2__uncultured bacterium; D_3__uncultured bacterium; D_4__uncultured bacterium; D_5__uncultured bacterium; D_6__uncultured bacterium	0.0166394	0	0.000323022	0.0163164	0
Otu2975	D_0__Bacteria; D_1__Bacteroidetes; D_2__Flavobacteriia; D_3__Flavobacteriales; D_4__Flavobacteriaceae; D_5__Algitalea	0.0165943	0.00890596	0.0029072	0.00137608	0.00340501
Otu1722	D_0__Bacteria; D_1__Proteobacteria; D_2__Gammaproteobacteria; D_3__Thiotrichales; D_4__Thiotrichaceae; D_5__uncultured	0.0165815	0.00148433	0.0119518	0.00314532	0
Otu1335	D_0__Bacteria; D_1__Bacteroidetes; D_2__Flavobacteriia; D_3__Flavobacteriales; D_4__Flavobacteriaceae; D_5__uncultured	0.0165515	0.000296865	0.00775254	0.00373507	0.00476701
Otu2025	D_0__Bacteria; D_1__Proteobacteria; D_2__Deltaproteobacteria; D_3__Myxococcales	0.0165078	0.00326552	0.0058144	0.0033419	0.00408601
Otu4111	D_0__Bacteria; D_1__Proteobacteria; D_2__Gammaproteobacteria; D_3__E01-9C-26 marine group	0.0164972	0.00949969	0.00646045	0.000196583	0.000340501
Otu2058	D_0__Bacteria; D_1__Acidobacteria; D_2__AT-s3-28	0.0164812	0.00356238	0.0029072	0.00864963	0.001362
Otu2633	D_0__Bacteria; D_1__Proteobacteria; D_2__Deltaproteobacteria; D_3__NB1-j; D_4__uncultured bacterium; D_5__uncultured bacterium; D_6__uncultured bacterium	0.0164741	0	0.0164741	0	0
Otu4181	D_0__Bacteria; D_1__Proteobacteria; D_2__Gammaproteobacteria; D_3__Alteromonadales; D_4__Psychromonadaceae; D_5__Psychromonas; D_6__uncultured bacterium	0.0164712	0.0103903	0.00452231	0.000196583	0.001362
Otu4109	D_0__Bacteria; D_1__Proteobacteria; D_2__Gammaproteobacteria; D_3__Oceanospirillales; D_4__Oceanospirillaceae; D_5__Marinomonas; Ambiguous_taxa	0.0164667	0.0112809	0.00484534	0	0.000340501
Otu832	D_0__Bacteria; D_1__Proteobacteria; D_2__Deltaproteobacteria; D_3__SAR324 clade(Marine group B); D_4__uncultured bacterium; D_5__uncultured bacterium; D_6__uncultured bacterium	0.016429	0	0.00129209	0.0151369	0
Otu2146	D_0__Bacteria; D_1__Firmicutes; D_2__Bacilli; D_3__Lactobacillales; D_4__Carnobacteriaceae; D_5__Atopostipes; D_6__uncultured bacterium	0.0164274	0.0100934	0.00613743	0.000196583	0
Otu1859	D_0__Bacteria; D_1__Bacteroidetes; D_2__Bacteroidia; D_3__Bacteroidales; D_4__uncultured; D_5__uncultured bacterium; D_6__uncultured bacterium	0.0164184	0.00712477	0.00807556	0.000196583	0.0010215
Otu4404	D_0__Bacteria; D_1__Proteobacteria; D_2__Gammaproteobacteria; D_3__Cellvibrionales; D_4__Spongiibacteraceae; D_5__BD1-7 clade; D_6__uncultured bacterium	0.0164122	0.000890596	0.0106597	0.0045214	0.000340501
Otu970	D_0__Bacteria; D_1__Firmicutes; D_2__Clostridia; D_3__Clostridiales; D_4__Lachnospiraceae	0.0164091	0.00742163	0.00387627	0.00511115	0
Otu1662	D_0__Bacteria; D_1__Proteobacteria; D_2__Deltaproteobacteria; D_3__Bdellovibrionales; D_4__Bdellovibrionaceae; D_5__Bdellovibrio; D_6__uncultured bacterium	0.0163212	0.00207806	0.00742952	0.00511115	0.0017025
Otu870	D_0__Bacteria; D_1__Proteobacteria; D_2__Alphaproteobacteria; D_3__Rhizobiales; D_4__Phyllobacteriaceae	0.0162462	0	0.000323022	0.0159232	0
Otu1316	D_0__Bacteria; D_1__Bacteroidetes; D_2__Flavobacteriia; D_3__Flavobacteriales; D_4__Flavobacteriaceae; D_5__Flavobacterium; Ambiguous_taxa	0.0162452	0.000890596	0.000323022	0.0143505	0.000681002
Otu1988	D_0__Bacteria; D_1__Proteobacteria; D_2__Gammaproteobacteria; D_3__Cellvibrionales; D_4__Cellvibrionaceae	0.016244	0.00890596	0.00646045	0.000196583	0.000681002
Otu1886	D_0__Bacteria; D_1__Bacteroidetes; D_2__Flavobacteriia; D_3__Flavobacteriales; D_4__Flavobacteriaceae; D_5__Euzebyella	0.01624	0.000296865	0.0122749	0.00196583	0.0017025
Otu3195	D_0__Bacteria; D_1__Proteobacteria; D_2__Gammaproteobacteria; D_3__Oceanospirillales; D_4__SAR86 clade	0.0162199	0.00385925	0.00323022	0.0033419	0.00578851
Otu2358	D_0__Bacteria; D_1__Planctomycetes; D_2__OM190; D_3__uncultured bacterium; D_4__uncultured bacterium; D_5__uncultured bacterium; D_6__uncultured bacterium	0.0161956	0.0068279	0.00936765	0	0
Otu1508	D_0__Bacteria; D_1__Proteobacteria; D_2__Gammaproteobacteria	0.0161782	0.00742163	0.00807556	0	0.000681002
Otu1620	D_0__Bacteria; D_1__Actinobacteria; D_2__Coriobacteriia; D_3__Coriobacteriales; D_4__Coriobacteriaceae; D_5__Collinsella; D_6__uncultured bacterium	0.0161591	0.00890596	0.00323022	0.0033419	0.000681002
Otu1214	D_0__Bacteria; D_1__Bacteroidetes; D_2__Flavobacteriia; D_3__Flavobacteriales; D_4__Cryomorphaceae; D_5__Crocinitomix; D_6__uncultured bacterium	0.0161511	0	0.0161511	0	0
Otu1011	D_0__Bacteria; D_1__Proteobacteria; D_2__Alphaproteobacteria; D_3__Rhodospirillales; D_4__Rhodospirillaceae; D_5__uncultured; D_6__uncultured bacterium	0.0161493	0	0.00710649	0.0090428	0
Otu3029	D_0__Bacteria; D_1__Proteobacteria; D_2__Gammaproteobacteria; D_3__Alteromonadales	0.0161437	0.0112809	0.00452231	0	0.000340501
Otu2194	D_0__Bacteria; D_1__Planctomycetes; D_2__BD7-11	0.0161298	0	0.014859	0.000589748	0.000681002
Otu3680	D_0__Bacteria; D_1__Proteobacteria; D_2__Alphaproteobacteria; D_3__Parvularculales; D_4__Parvularculaceae	0.0160988	0.000593731	0.0155051	0	0
Otu1071	D_0__Bacteria; D_1__Firmicutes; D_2__Bacilli; D_3__Lactobacillales; D_4__Leuconostocaceae; D_5__Leuconostoc; D_6__Leuconostoc citreum	0.0160576	0.00118746	0.000323022	0.0145471	0
Otu4700	D_0__Bacteria; D_1__Proteobacteria; D_2__Alphaproteobacteria; D_3__SAR11 clade; D_4__Surface 1	0.0160142	0.00148433	0.00258418	0.00275216	0.00919352
Otu2689	D_0__Bacteria; D_1__Cyanobacteria; D_2__Cyanobacteria; D_3__SubsectionIII; D_4__FamilyI; D_5__Phormidium; Ambiguous_taxa	0.0159665	0.00148433	0.00904463	0.00373507	0.0017025
Otu2178	D_0__Bacteria; D_1__Proteobacteria; D_2__Alphaproteobacteria; D_3__Alphaproteobacteria Incertae Sedis; D_4__Unknown Family; D_5__uncultured; D_6__uncultured bacterium	0.015962	0.00148433	0.00387627	0.00923938	0.001362
Otu1843	D_0__Bacteria; D_1__Proteobacteria; D_2__Gammaproteobacteria; D_3__uncultured; Ambiguous_taxa; Ambiguous_taxa; Ambiguous_taxa	0.0159157	0	0.0151821	0.000393165	0.000340501
Otu1741	D_0__Bacteria; D_1__Planctomycetes; D_2__vadinHA49; D_3__uncultured bacterium; D_4__uncultured bacterium; D_5__uncultured bacterium; D_6__uncultured bacterium	0.0159157	0.00267179	0.0132439	0	0
Otu3451	D_0__Bacteria; D_1__Proteobacteria; D_2__Deltaproteobacteria; D_3__Bdellovibrionales; D_4__Bdellovibrionaceae; D_5__OM27 clade; Ambiguous_taxa	0.015914	0.00474985	0.00549138	0.00294874	0.00272401
Otu2870	D_0__Bacteria; D_1__Proteobacteria; D_2__Gammaproteobacteria; D_3__Cellvibrionales; D_4__Porticoccaceae; D_5__SAR92 clade	0.0159075	0.000296865	0.000323022	0.00609406	0.00919352
Otu3069	D_0__Bacteria; D_1__Bacteroidetes; D_2__Flavobacteriia; D_3__Flavobacteriales; D_4__Flavobacteriaceae; D_5__Flavobacterium; Ambiguous_taxa	0.015853	0	0.000323022	0.01553	0
Otu1867	D_0__Bacteria; D_1__Proteobacteria; D_2__Deltaproteobacteria; D_3__SAR324 clade(Marine group B)	0.0157989	0.0100934	0.00516836	0.000196583	0.000340501
Otu4071	D_0__Bacteria; D_1__Bacteroidetes; D_2__Flavobacteriia; D_3__Flavobacteriales; D_4__Flavobacteriaceae; D_5__Flavicella	0.0157916	0.00593731	0.00355325	0.00255557	0.00374551
Otu962	D_0__Bacteria; D_1__Actinobacteria; D_2__Actinobacteria	0.0157776	0.000593731	0.00678347	0.00805989	0.000340501
Otu2105	D_0__Bacteria; D_1__Bacteroidetes; D_2__Bacteroidia; D_3__Bacteroidales; D_4__Bacteroidaceae; D_5__Bacteroides; D_6__uncultured bacterium	0.0157723	0.00653104	0.00904463	0.000196583	0
Otu2863	D_0__Bacteria; D_1__Proteobacteria; D_2__Gammaproteobacteria; D_3__Oceanospirillales; D_4__Oceanospirillaceae; D_5__Pseudohongiella; Ambiguous_taxa	0.0157567	0.000296865	0.000323022	0.0151369	0
Otu1312	D_0__Bacteria; D_1__Bacteroidetes; D_2__Flavobacteriia; D_3__Flavobacteriales; D_4__Flavobacteriaceae; D_5__Chryseobacterium; Ambiguous_taxa	0.0157266	0	0	0.0157266	0
Otu1973	D_0__Bacteria; D_1__Proteobacteria; D_2__Betaproteobacteria; D_3__Methylophilales; D_4__Methylophilaceae; D_5__OM43 clade	0.0157157	0.00148433	0.00226116	0.000393165	0.011577
Otu4406	D_0__Bacteria; D_1__Proteobacteria; D_2__Alphaproteobacteria; D_3__Rhodospirillales; D_4__Rhodospirillaceae; D_5__uncultured; D_6__uncultured alpha proteobacterium	0.0156978	0	0.01389	0.00078633	0.0010215
Otu3866	D_0__Bacteria; D_1__Proteobacteria; D_2__Alphaproteobacteria; D_3__S26-47	0.0156945	0.000593731	0.0125979	0.00216241	0.000340501
Otu3638	D_0__Bacteria; D_1__Proteobacteria; D_2__Betaproteobacteria; D_3__Methylophilales; D_4__Methylophilaceae; D_5__Methylotenera	0.0155863	0	0.000646045	0.0149403	0
Otu1745	D_0__Bacteria; D_1__Proteobacteria; D_2__Gammaproteobacteria; D_3__Cellvibrionales; D_4__Cellvibrionaceae; D_5__uncultured; D_6__uncultured bacterium	0.0155818	0.00237492	0.00387627	0.00864963	0.000681002
Otu1958	D_0__Bacteria; D_1__Proteobacteria; D_2__Gammaproteobacteria; D_3__Sva0071; D_4__uncultured bacterium; D_5__uncultured bacterium; D_6__uncultured bacterium	0.0155419	0.00356238	0.0100137	0.00196583	0
Otu1394	D_0__Bacteria; D_1__Proteobacteria; D_2__Gammaproteobacteria; D_3__Gammaproteobacteria Incertae Sedis; D_4__Unknown Family; D_5__uncultured	0.0155309	0	0.00452231	0.0110086	0
Otu2539	D_0__Bacteria; D_1__Proteobacteria; D_2__Alphaproteobacteria; D_3__SAR11 clade; D_4__Surface 1	0.0154683	0.00534358	0.00387627	0.00216241	0.00408601
Otu4138	D_0__Bacteria; D_1__Proteobacteria; D_2__Gammaproteobacteria; D_3__Arenicellales; D_4__Arenicellaceae; D_5__Arenicella	0.0154387	0.00148433	0.00355325	0.00393165	0.00646952
Otu2400	D_0__Bacteria; D_1__Tectomicrobia; D_2__Tectomicrobia Incertae Sedis; D_3__Unknown Order; D_4__Unknown Family; D_5__Candidatus Entotheonella; D_6__uncultured bacterium	0.0153756	0.00445298	0.00872161	0.0011795	0.0010215
Otu2359	D_0__Bacteria; D_1__Proteobacteria; D_2__Alphaproteobacteria; D_3__Rhodobacterales; D_4__Rhodobacteraceae; D_5__Sulfitobacter; D_6__uncultured marine bacterium	0.015358	0.00356238	0.00355325	0.00688039	0.001362
Otu3144	D_0__Bacteria; D_1__Actinobacteria; D_2__Actinobacteria; D_3__Micrococcales; D_4__Micrococcaceae; D_5__Arthrobacter; Ambiguous_taxa	0.0153129	0.000593731	0.00129209	0.00491457	0.00851252
Otu2140	D_0__Bacteria; D_1__Bacteroidetes; D_2__Flavobacteriia; D_3__Flavobacteriales; D_4__NS7 marine group; D_5__uncultured bacterium; D_6__uncultured bacterium	0.0152892	0.00118746	0.00258418	0.00845305	0.00306451
Otu934	D_0__Bacteria; D_1__Nitrospinae; D_2__Nitrospinia; D_3__Nitrospinales; D_4__Nitrospinaceae; D_5__Nitrospina; D_6__uncultured bacterium	0.0152174	0.000593731	0.01389	0.000393165	0.000340501
Otu2996	D_0__Bacteria; D_1__Proteobacteria; D_2__Gammaproteobacteria; D_3__Gammaproteobacteria Incertae Sedis; D_4__Unknown Family; D_5__uncultured; Ambiguous_taxa	0.0151982	0.00118746	0.00355325	0.00943597	0.0010215
Otu1261	D_0__Bacteria; D_1__Bacteroidetes; D_2__Flavobacteriia; D_3__Flavobacteriales; D_4__Flavobacteriaceae	0.0151821	0	0.0151821	0	0
Otu2200	Unassigned	0.0151804	0.00534358	0.00387627	0.00255557	0.00340501
Otu3241	D_0__Bacteria; D_1__Bacteroidetes; D_2__Flavobacteriia; D_3__Flavobacteriales; D_4__Flavobacteriaceae; D_5__Wenyingzhuangia	0.0150726	0.00296865	0.000969067	0.00432482	0.00681002
Otu2652	D_0__Bacteria; D_1__Planctomycetes; D_2__Pla4 lineage; D_3__uncultured bacterium; D_4__uncultured bacterium; D_5__uncultured bacterium; D_6__uncultured bacterium	0.0150695	0	0.01389	0.0011795	0
Otu1868	D_0__Bacteria; D_1__Proteobacteria; D_2__Deltaproteobacteria; D_3__Myxococcales; D_4__Nannocystaceae; D_5__Nannocystis	0.0150295	0.000296865	0.014536	0.000196583	0
Otu3943	D_0__Bacteria; D_1__Bacteroidetes; D_2__Flavobacteriia; D_3__Flavobacteriales; D_4__Flavobacteriaceae; D_5__Pibocella	0.0150253	0.000593731	0.00226116	0.0057009	0.00646952
Otu1476	D_0__Bacteria; D_1__Acidobacteria; D_2__Subgroup 21; D_3__uncultured bacterium; D_4__uncultured bacterium; D_5__uncultured bacterium; D_6__uncultured bacterium	0.0150007	0.00474985	0.00258418	0.00766672	0
Otu2621	D_0__Bacteria; D_1__Proteobacteria; D_2__Gammaproteobacteria; D_3__Oceanospirillales; D_4__OM182 clade	0.0149701	0.00207806	0.00936765	0.00216241	0.001362
Otu2526	D_0__Bacteria; D_1__Proteobacteria; D_2__Betaproteobacteria; D_3__Nitrosomonadales; D_4__Nitrosomonadaceae; D_5__Nitrosomonas	0.0149632	0.00118746	0.00516836	0.0045214	0.00408601
Otu2469	D_0__Bacteria; D_1__Proteobacteria; D_2__Deltaproteobacteria; D_3__Bdellovibrionales; D_4__Bdellovibrionaceae; D_5__OM27 clade	0.0149388	0.0100934	0.00484534	0	0
Otu3017	D_0__Bacteria; D_1__Proteobacteria; D_2__Alphaproteobacteria; D_3__Rhizobiales; D_4__Phyllobacteriaceae	0.0149337	0	0.00226116	0.0119915	0.000681002
Otu2141	D_0__Bacteria; D_1__Firmicutes; D_2__Bacilli; D_3__Lactobacillales; D_4__Carnobacteriaceae; D_5__Atopostipes; D_6__uncultured bacterium	0.0148773	0.00712477	0.00775254	0	0
Otu2363	D_0__Bacteria; D_1__Proteobacteria; D_2__Gammaproteobacteria; D_3__Alteromonadales	0.0148603	0.010984	0.00387627	0	0
Otu1718	D_0__Bacteria; D_1__Actinobacteria; D_2__Acidimicrobiia; D_3__Acidimicrobiales; D_4__uncultured; Ambiguous_taxa; Ambiguous_taxa	0.0148421	0.000890596	0.0058144	0.00609406	0.00204301
Otu1955	D_0__Bacteria; D_1__Bacteroidetes; D_2__Flavobacteriia; D_3__Flavobacteriales; D_4__Flavobacteriaceae	0.0147548	0.00267179	0.00161511	0.0057009	0.00476701
Otu1083	D_0__Bacteria; D_1__Proteobacteria; D_2__Gammaproteobacteria; D_3__Pseudomonadales; D_4__Pseudomonadaceae; D_5__Pseudomonas; D_6__uncultured bacterium	0.0147386	0.000296865	0	0.0137608	0.000681002
Otu3744	D_0__Bacteria; D_1__Proteobacteria; D_2__Alphaproteobacteria; D_3__Emcibacterales; D_4__Emcibacteraceae; D_5__Emcibacter; D_6__uncultured alpha proteobacterium	0.0147164	0.000593731	0.00258418	0.000982913	0.0105555
Otu2778	D_0__Bacteria; D_1__Proteobacteria; D_2__Alphaproteobacteria; D_3__Rhizobiales; D_4__Rhodobiaceae; D_5__Rhodobium	0.0146981	0.00356238	0.00387627	0.00589748	0.001362
Otu1512	D_0__Bacteria; D_1__Proteobacteria; D_2__Alphaproteobacteria; D_3__Rhodospirillales; D_4__Rhodospirillaceae; D_5__uncultured	0.0146942	0.00653104	0.00742952	0.000393165	0.000340501
Otu1408	D_0__Bacteria; D_1__Proteobacteria; D_2__Deltaproteobacteria; D_3__NB1-j; D_4__uncultured bacterium; D_5__uncultured bacterium; D_6__uncultured bacterium	0.0146763	0	0.01389	0.00078633	0
Otu2028	D_0__Bacteria; D_1__Proteobacteria; D_2__Betaproteobacteria; D_3__Burkholderiales; D_4__Comamonadaceae	0.014647	0.00118746	0.00355325	0.0078633	0.00204301
Otu3722	D_0__Bacteria; D_1__Chlorobi; D_2__Chlorobia; D_3__Chlorobiales; D_4__OPB56; D_5__uncultured bacterium; D_6__uncultured bacterium	0.01464	0.00118746	0.00387627	0.00412823	0.00544801
Otu1356	D_0__Bacteria; D_1__Proteobacteria; D_2__Alphaproteobacteria; D_3__Rhodobacterales; D_4__Rhodobacteraceae	0.0146321	0.000593731	0.00161511	0.0114018	0.0010215
Otu2515	D_0__Bacteria; D_1__Proteobacteria; D_2__Deltaproteobacteria; D_3__NB1-j	0.0145414	0.00415612	0.00775254	0.000589748	0.00204301
Otu1764	D_0__Bacteria; D_1__Chloroflexi; D_2__Anaerolineae; D_3__Anaerolineales; D_4__Anaerolineaceae; D_5__uncultured; D_6__uncultured bacterium	0.014536	0	0.014536	0	0
Otu2493	D_0__Bacteria; D_1__Proteobacteria; D_2__Deltaproteobacteria; D_3__NB1-j; D_4__uncultured delta proteobacterium; D_5__uncultured delta proteobacterium; D_6__uncultured delta proteobacterium	0.0145099	0.000296865	0.014213	0	0
Otu4419	D_0__Bacteria; D_1__Proteobacteria; D_2__Gammaproteobacteria; D_3__Alteromonadales; D_4__Colwelliaceae; D_5__Colwellia	0.0145038	0.00653104	0.00323022	0.00235899	0.00238351
Otu3986	D_0__Bacteria; D_1__Proteobacteria; D_2__Alphaproteobacteria; D_3__Alphaproteobacteria Incertae Sedis; D_4__uncultured	0.0145025	0.00326552	0.00129209	0.00688039	0.00306451
Otu2929	D_0__Bacteria; D_1__Proteobacteria; D_2__Alphaproteobacteria; D_3__Rhodobacterales; D_4__Rhodobacteraceae; D_5__Albimonas	0.0144868	0.00118746	0.00936765	0.00393165	0
Otu1522	D_0__Bacteria; D_1__Proteobacteria; D_2__Gammaproteobacteria; D_3__Legionellales; D_4__Legionellaceae; D_5__uncultured; D_6__uncultured bacterium	0.0144854	0.00534358	0.00387627	0.0011795	0.00408601
Otu1725	D_0__Bacteria; D_1__Proteobacteria; D_2__Epsilonproteobacteria; D_3__Campylobacterales; D_4__Campylobacteraceae; D_5__Sulfurospirillum; Ambiguous_taxa	0.0144429	0.0068279	0.00452231	0.00275216	0.000340501
Otu2173	D_0__Bacteria; D_1__Proteobacteria; D_2__Deltaproteobacteria; D_3__NB1-j; D_4__uncultured delta proteobacterium; D_5__uncultured delta proteobacterium; D_6__uncultured delta proteobacterium	0.0144362	0.000890596	0.0122749	0.000589748	0.000681002
Otu1995	D_0__Bacteria; D_1__Bacteroidetes; D_2__Flavobacteriia; D_3__Flavobacteriales; D_4__Flavobacteriaceae; D_5__Flavobacterium; D_6__uncultured bacterium	0.01441	0	0	0.00589748	0.00851252
Otu1169	D_0__Bacteria; D_1__Proteobacteria; D_2__Alphaproteobacteria; D_3__Rhizobiales	0.0144087	0	0.00969067	0.00471798	0
Otu1369	D_0__Bacteria; D_1__Bacteroidetes; D_2__Flavobacteriia; D_3__Flavobacteriales; D_4__Cryomorphaceae; D_5__Fluviicola; Ambiguous_taxa	0.014389	0.00979656	0.00419929	0.000393165	0
Otu3679	D_0__Bacteria; D_1__Bacteroidetes; D_2__Flavobacteriia; D_3__Flavobacteriales; D_4__Flavobacteriaceae; D_5__uncultured	0.0143592	0.00267179	0.00646045	0.00216241	0.00306451
Otu1705	D_0__Bacteria; D_1__Proteobacteria; D_2__Gammaproteobacteria; D_3__Thiotrichales; D_4__Thiotrichaceae; D_5__Cocleimonas	0.0143573	0	0	0.00550431	0.00885302
Otu3481	D_0__Bacteria; D_1__Firmicutes; D_2__Negativicutes; D_3__Selenomonadales; D_4__Acidaminococcaceae; D_5__uncultured	0.014345	0.00949969	0.00484534	0	0
Otu2802	D_0__Bacteria; D_1__Proteobacteria; D_2__Alphaproteobacteria; D_3__Alphaproteobacteria Incertae Sedis; D_4__Unknown Family; D_5__uncultured; D_6__uncultured bacterium	0.0143291	0.00712477	0.00484534	0.00235899	0
Otu2092	D_0__Bacteria; D_1__Proteobacteria; D_2__Alphaproteobacteria; D_3__Rhodospirillales; D_4__Rhodospirillaceae; D_5__uncultured; D_6__uncultured alpha proteobacterium	0.0143272	0.00623417	0.00775254	0	0.000340501
Otu1064	D_0__Bacteria; D_1__Proteobacteria; D_2__Alphaproteobacteria; D_3__Rickettsiales; D_5__marine metagenome; D_6__marine metagenome	0.0142963	0.00385925	0.00323022	0.00550431	0.0017025
Otu1778	D_0__Bacteria; D_1__Proteobacteria; D_2__JTB23; D_3__uncultured bacterium; D_4__uncultured bacterium; D_5__uncultured bacterium; D_6__uncultured bacterium	0.0142942	0.000296865	0.00710649	0.00314532	0.00374551
Otu1595	D_0__Bacteria; D_1__Proteobacteria; D_2__Deltaproteobacteria; D_3__NB1-j; D_4__uncultured bacterium; D_5__uncultured bacterium; D_6__uncultured bacterium	0.0142806	0.000296865	0.00904463	0.00255557	0.00238351
Otu974	D_0__Bacteria; D_1__Bacteroidetes; D_2__Flavobacteriia; D_3__Flavobacteriales; D_4__Flavobacteriaceae	0.0142542	0.000296865	0	0.0139574	0
Otu2977	D_0__Bacteria; D_1__Bacteroidetes; D_2__Flavobacteriia; D_3__Flavobacteriales; D_4__Flavobacteriaceae; D_5__Tenacibaculum; Ambiguous_taxa	0.0142444	0.00326552	0.00936765	0.000589748	0.0010215
Otu2739	D_0__Bacteria; D_1__Proteobacteria; D_2__Gammaproteobacteria; D_3__Cellvibrionales; D_4__Halieaceae; D_5__OM60(NOR5) clade	0.0141793	0.00296865	0.00969067	0.0011795	0.000340501
Otu1501	D_0__Bacteria; D_1__Proteobacteria; D_2__Deltaproteobacteria; D_3__Bradymonadales; D_4__uncultured bacterium; D_5__uncultured bacterium; D_6__uncultured bacterium	0.0141362	0	0	0.00766672	0.00646952
Otu1174	D_0__Bacteria; D_1__Bacteroidetes; D_2__Flavobacteriia; D_3__Flavobacteriales; D_4__Flavobacteriaceae; D_5__Flavobacterium; Ambiguous_taxa	0.0141013	0	0	0.0137608	0.000340501
Otu2331	D_0__Bacteria; D_1__Bacteroidetes; D_2__Flavobacteriia; D_3__Flavobacteriales; D_4__Flavobacteriaceae; D_5__Eudoraea; Ambiguous_taxa	0.0140358	0.000890596	0.0109828	0.00216241	0
Otu2342	D_0__Bacteria; D_1__Proteobacteria; D_2__Epsilonproteobacteria; D_3__Campylobacterales; D_4__Helicobacteraceae; D_5__Sulfurimonas	0.0140192	0.00593731	0.00484534	0.00255557	0.000681002
Otu1293	D_0__Bacteria; D_1__Bacteroidetes; D_2__Flavobacteriia; D_3__Flavobacteriales; D_4__Schleiferiaceae; D_5__Schleiferia; Ambiguous_taxa	0.0139938	0.000593731	0.00484534	0.00412823	0.00442651
Otu1288	D_0__Bacteria; D_1__Proteobacteria; D_2__Alphaproteobacteria; D_3__Rhodobacterales; D_4__Rhodobacteraceae; D_5__Pseudovibrio; Ambiguous_taxa	0.0139574	0	0	0.0139574	0
Otu1490	D_0__Bacteria; D_1__Bacteroidetes; D_2__Sphingobacteriia; D_3__Sphingobacteriales; D_4__NS11-12 marine group; Ambiguous_taxa; Ambiguous_taxa	0.0139523	0.00801537	0.00452231	0.000393165	0.0010215
Otu2479	D_0__Bacteria; D_1__Lentisphaerae; D_2__Lentisphaeria; D_3__Victivallales; D_4__Arctic95B-14; D_5__uncultured bacterium; D_6__uncultured bacterium	0.0139074	0	0.0135669	0	0.000340501
Otu2317	D_0__Bacteria; D_1__Firmicutes; D_2__Negativicutes; D_3__Selenomonadales; D_4__Veillonellaceae; D_5__uncultured	0.0138559	0.0077185	0.00613743	0	0
Otu1264	D_0__Bacteria; D_1__Bacteroidetes; D_2__Flavobacteriia; D_3__Flavobacteriales; D_4__Flavobacteriaceae	0.0138451	0.000890596	0.0058144	0.00373507	0.00340501
Otu2125	D_0__Bacteria; D_1__Proteobacteria; D_2__Gammaproteobacteria; D_3__HOC36; D_4__uncultured gamma proteobacterium; D_5__uncultured gamma proteobacterium; D_6__uncultured gamma proteobacterium	0.0138182	0.00534358	0.0029072	0.00216241	0.00340501
Otu1203	D_0__Bacteria; D_1__Proteobacteria; D_2__Deltaproteobacteria	0.0137994	0	0	0.0127779	0.0010215
Otu3576	D_0__Bacteria; D_1__Proteobacteria; D_2__Gammaproteobacteria; D_3__Alteromonadales; D_4__Colwelliaceae; D_5__Colwellia; D_6__uncultured bacterium	0.0137949	0.0086091	0.00484534	0	0.000340501
Otu3264	D_0__Bacteria; D_1__Proteobacteria; D_2__Gammaproteobacteria	0.0137828	0.00118746	0.00129209	0.00176924	0.00953402
Otu3066	D_0__Bacteria; D_1__Proteobacteria; D_2__Gammaproteobacteria; D_3__Thiotrichales; D_4__Thiotrichaceae; D_5__Cocleimonas; D_6__uncultured bacterium	0.0137575	0.000593731	0	0.00294874	0.010215
Otu3340	D_0__Bacteria; D_1__Bacteroidetes; D_2__Flavobacteriia; D_3__Flavobacteriales; D_4__Flavobacteriaceae	0.0137532	0.000296865	0.00549138	0.00353849	0.00442651
Otu4245	D_0__Bacteria; D_1__Proteobacteria; D_2__SPOTSOCT00m83; Ambiguous_taxa; Ambiguous_taxa; Ambiguous_taxa; Ambiguous_taxa	0.0137521	0.00534358	0.0058144	0.00157266	0.0010215
Otu1660	D_0__Bacteria; D_1__Firmicutes; D_2__Bacilli; D_3__Lactobacillales; D_4__Streptococcaceae; D_5__Streptococcus; D_6__uncultured bacterium	0.0137215	0.00653104	0.0058144	0.00137608	0
Otu2012	D_0__Bacteria; D_1__Chloroflexi	0.0137088	0.000296865	0.0106597	0.00275216	0
Otu2720	Unassigned	0.0136725	0.00653104	0.00646045	0	0.000681002
Otu2888	D_0__Bacteria; D_1__Proteobacteria; D_2__Alphaproteobacteria; D_3__Rhizobiales; D_4__OCS116 clade; D_5__uncultured bacterium; D_6__uncultured bacterium	0.0136648	0	0.0113058	0.00235899	0
Otu1731	D_0__Bacteria; D_1__Proteobacteria; D_2__Betaproteobacteria; D_3__Burkholderiales; D_4__Comamonadaceae; D_5__uncultured	0.0136645	0.000296865	0	0.0133676	0
Otu1822	D_0__Bacteria; D_1__Chloroflexi; D_2__Ardenticatenia; D_3__uncultured	0.0136561	0.000296865	0.0106597	0.00235899	0.000340501
Otu1793	D_0__Bacteria; D_1__Proteobacteria; D_2__Alphaproteobacteria; D_3__Rhodospirillales; D_4__Rhodospirillaceae; D_5__uncultured; D_6__uncultured bacterium	0.0136161	0.00326552	0.00936765	0.000982913	0
Otu1294	D_0__Bacteria; D_1__Actinobacteria; D_2__Acidimicrobiia; D_3__Acidimicrobiales; D_4__uncultured; D_5__uncultured bacterium; D_6__uncultured bacterium	0.0135942	0.00653104	0.00161511	0	0.00544801
Otu2900	D_0__Bacteria; D_1__Chloroflexi; D_2__Anaerolineae; D_3__Anaerolineales; D_4__Anaerolineaceae; D_5__uncultured	0.0135669	0	0.0135669	0	0
Otu2867	D_0__Bacteria; D_1__Proteobacteria; D_2__Gammaproteobacteria; D_3__Thiotrichales; D_4__Thiotrichales Incertae Sedis; D_5__Candidatus Endoecteinascidia; D_6__uncultured bacterium	0.0135287	0.00712477	0.00484534	0.000196583	0.001362
Otu3247	D_0__Bacteria; D_1__Proteobacteria; D_2__Deltaproteobacteria; D_3__Myxococcales; D_4__bacteriap25; D_5__uncultured bacterium; D_6__uncultured bacterium	0.0134885	0.00326552	0.00355325	0.00530773	0.001362
Otu770	D_0__Bacteria; D_1__Proteobacteria; D_2__Deltaproteobacteria; D_3__Bradymonadales; D_4__uncultured bacterium; D_5__uncultured bacterium; D_6__uncultured bacterium	0.0134842	0.000593731	0.00129209	0.0115984	0
Otu1318	D_0__Bacteria; D_1__Lentisphaerae; D_2__Oligosphaeria; D_3__P.palmC41; D_4__uncultured bacterium; D_5__uncultured bacterium; D_6__uncultured bacterium	0.0134731	0.00564044	0.00484534	0.00196583	0.0010215
Otu3731	D_0__Bacteria; D_1__Bacteroidetes; D_2__Flavobacteriia; D_3__Flavobacteriales; D_4__Flavobacteriaceae	0.0134586	0	0.000323022	0.000196583	0.012939
Otu1762	D_0__Bacteria; D_1__Proteobacteria; D_2__Gammaproteobacteria; D_3__Cellvibrionales	0.0134405	0	0.0132439	0.000196583	0
Otu1424	D_0__Bacteria; D_1__Bacteroidetes; D_2__Flavobacteriia; D_3__Flavobacteriales; D_4__Cryomorphaceae; D_5__uncultured	0.0134282	0.000296865	0.0119518	0.0011795	0
Otu1031	D_0__Bacteria; D_1__Saccharibacteria; D_2__uncultured bacterium; D_3__uncultured bacterium; D_4__uncultured bacterium; D_5__uncultured bacterium; D_6__uncultured bacterium	0.0134247	0.00326552	0.000646045	0.00747014	0.00204301
Otu1393	D_0__Bacteria; D_1__Proteobacteria; D_2__Gammaproteobacteria; D_3__Chromatiales; D_4__Granulosicoccaceae; D_5__Granulosicoccus	0.0134118	0.000296865	0.000969067	0.00805989	0.00408601
Otu2669	D_0__Bacteria; D_1__Proteobacteria; D_2__Gammaproteobacteria; D_3__Oceanospirillales; D_4__Alcanivoracaceae; D_5__Kangiella; D_6__uncultured bacterium	0.0133928	0.000296865	0.0106597	0.000393165	0.00204301
Otu2368	D_0__Bacteria; D_1__Firmicutes; D_2__Bacilli; D_3__Lactobacillales; D_4__Carnobacteriaceae; D_5__Lacticigenium; D_6__uncultured bacterium	0.0133676	0	0	0.0133676	0
Otu3457	D_0__Bacteria; D_1__Firmicutes; D_2__Clostridia; D_3__Clostridiales; D_4__Family XI; D_5__Tissierella	0.0133676	0	0	0.0133676	0
Otu1918	D_0__Bacteria; D_1__Gracilibacteria; D_2__uncultured bacterium; D_3__uncultured bacterium; D_4__uncultured bacterium; D_5__uncultured bacterium; D_6__uncultured bacterium	0.01335	0.00504671	0.0058144	0.00078633	0.0017025
Otu1433	D_0__Bacteria; D_1__Proteobacteria; D_2__Epsilonproteobacteria; D_3__Campylobacterales; D_4__Helicobacteraceae; D_5__Sulfurovum	0.0133371	0.00326552	0.00193813	0.000982913	0.00715052
Otu4238	D_0__Bacteria; D_1__Actinobacteria; D_2__Acidimicrobiia; D_3__Acidimicrobiales; D_4__Acidimicrobiales Incertae Sedis; D_5__Candidatus Microthrix; Ambiguous_taxa	0.0132491	0.000296865	0.0116288	0.000982913	0.000340501
Otu2127	D_0__Bacteria; D_1__Chloroflexi; D_2__Caldilineae; D_3__Caldilineales; D_4__Caldilineaceae; D_5__uncultured; D_6__uncultured bacterium	0.0132439	0	0.0132439	0	0
Otu2473	D_0__Bacteria; D_1__Acidobacteria; D_2__Holophagae; D_3__Subgroup 10; D_4__CA002	0.0132439	0	0.0132439	0	0
Otu2657	D_0__Bacteria; D_1__Proteobacteria; D_2__Gammaproteobacteria; D_3__Alteromonadales; D_4__Moritellaceae; D_5__Moritella	0.013241	0.00237492	0.00710649	0.00137608	0.00238351
Otu2366	D_0__Bacteria; D_1__Proteobacteria; D_2__Gammaproteobacteria; D_3__Arenicellales; D_4__Arenicellaceae; D_5__uncultured; Ambiguous_taxa	0.0132226	0	0.0119518	0.000589748	0.000681002
Otu3486	D_0__Bacteria; D_1__Chloroflexi; D_2__Anaerolineae; D_3__Anaerolineales; D_4__Anaerolineaceae; D_5__uncultured; D_6__uncultured bacterium	0.0131351	0.000593731	0.0109828	0.000196583	0.001362
Otu1817	D_0__Bacteria; D_1__Proteobacteria; D_2__Deltaproteobacteria; D_3__NB1-j; D_4__uncultured bacterium; D_5__uncultured bacterium; D_6__uncultured bacterium	0.01313	0.00207806	0.00613743	0.00491457	0
Otu1465	D_0__Bacteria; D_1__Proteobacteria; D_2__Gammaproteobacteria; D_3__Oceanospirillales; D_4__Oceanospirillaceae; D_5__Pseudohongiella; D_6__uncultured gamma proteobacterium	0.0131175	0	0.0129209	0.000196583	0
Otu2029	D_0__Bacteria; D_1__Bacteroidetes; D_2__Bacteroidia; D_3__Bacteroidales; D_4__Prevotellaceae; D_5__Prevotella 9; D_6__uncultured bacterium	0.0131056	0.00415612	0.00742952	0.0011795	0.000340501
Otu3050	D_0__Bacteria; D_1__Proteobacteria; D_2__Gammaproteobacteria; D_3__Cellvibrionales; D_4__Spongiibacteraceae; D_5__BD1-7 clade	0.0130273	0.00296865	0.00678347	0.00157266	0.0017025
Otu2885	D_0__Bacteria; D_1__Proteobacteria; D_2__Betaproteobacteria; D_3__Burkholderiales; D_4__Comamonadaceae	0.0130086	0.000890596	0.000323022	0.011795	0
Otu2474	D_0__Bacteria; D_1__Peregrinibacteria; D_2__uncultured bacterium; D_3__uncultured bacterium; D_4__uncultured bacterium; D_5__uncultured bacterium; D_6__uncultured bacterium	0.012952	0.00267179	0.00872161	0.000196583	0.001362
Otu2337	D_0__Bacteria; D_1__Planctomycetes; D_2__OM190; Ambiguous_taxa; Ambiguous_taxa; Ambiguous_taxa; Ambiguous_taxa	0.0129441	0.00474985	0.00516836	0.000982913	0.00204301
Otu3522	D_0__Bacteria; D_1__Proteobacteria; D_2__Gammaproteobacteria; D_3__E01-9C-26 marine group; D_4__uncultured proteobacterium; D_5__uncultured proteobacterium; D_6__uncultured proteobacterium	0.012939	0	0	0	0.012939
Otu1416	D_0__Bacteria; D_1__Proteobacteria; D_2__Deltaproteobacteria; D_3__NB1-j	0.0128424	0.000890596	0.0119518	0	0
Otu4476	D_0__Bacteria; D_1__Proteobacteria; D_2__SPOTSOCT00m83; D_3__uncultured bacterium; D_4__uncultured bacterium; D_5__uncultured bacterium; D_6__uncultured bacterium	0.0128298	0.000593731	0.0113058	0.000589748	0.000340501
Otu2930	D_0__Bacteria; D_1__Bacteroidetes; D_2__Flavobacteriia; D_3__Flavobacteriales; D_4__Flavobacteriaceae; D_5__Pibocella	0.0128191	0.00296865	0.00193813	0.00314532	0.00476701
Otu1856	D_0__Bacteria; D_1__Proteobacteria; D_2__Deltaproteobacteria; D_3__Bdellovibrionales; D_4__Bdellovibrionaceae; D_5__OM27 clade	0.0127997	0.00890596	0.00355325	0	0.000340501
Otu1646	D_0__Bacteria; D_1__Proteobacteria; D_2__Alphaproteobacteria; D_3__Rhodobacterales; D_4__Rhodobacteraceae; D_5__Oceaniovalibus	0.0127931	0.00118746	0.00129209	0.00963255	0.000681002
Otu3969	D_0__Bacteria; D_1__Proteobacteria; D_2__Deltaproteobacteria; D_3__Desulfurellales; D_4__Desulfurellaceae; D_5__H16; D_6__uncultured delta proteobacterium	0.0127799	0.00385925	0.00387627	0.0033419	0.0017025
Otu3673	D_0__Bacteria; D_1__Proteobacteria; D_2__SPOTSOCT00m83	0.0127783	0.000296865	0.00969067	0.00176924	0.0010215
Otu4390	D_0__Bacteria; D_1__Proteobacteria; D_2__Alphaproteobacteria; D_3__Sphingomonadales; D_4__Sphingomonadaceae; D_5__Sphingorhabdus	0.0127696	0.00178119	0.00484534	0.00137608	0.00476701
Otu1634	D_0__Bacteria; D_1__Proteobacteria; D_2__Gammaproteobacteria; D_3__HTA4	0.012768	0.000593731	0.000969067	0.0112052	0
Otu1890	D_0__Bacteria; D_1__Chlorobi; D_2__Chlorobia; D_3__Chlorobiales; D_4__OPB56; D_5__uncultured bacterium; D_6__uncultured bacterium	0.0127129	0.000593731	0.00646045	0.00157266	0.00408601
Otu4304	D_0__Bacteria; D_1__Bacteroidetes; D_2__Bacteroidetes Incertae Sedis; D_3__Order II; D_4__Rhodothermaceae; D_5__uncultured; D_6__uncultured bacterium	0.0126746	0.00385925	0.00387627	0.00255557	0.00238351
Otu2065	D_0__Bacteria; D_1__Proteobacteria; D_2__Gammaproteobacteria; D_3__BD7-8 marine group; D_4__uncultured bacterium; D_5__uncultured bacterium; D_6__uncultured bacterium	0.0126596	0	0.00549138	0.00648723	0.000681002
Otu4166	D_0__Bacteria; D_1__Proteobacteria; D_2__Gammaproteobacteria; D_3__Cellvibrionales; D_4__Halieaceae; Ambiguous_taxa	0.0126428	0	0.00936765	0.00157266	0.0017025
Otu1246	D_0__Bacteria; D_1__Actinobacteria; D_2__Actinobacteria; D_3__Micrococcales; D_4__Microbacteriaceae	0.0126416	0.000593731	0.000646045	0.0114018	0
Otu2591	D_0__Bacteria; D_1__Proteobacteria; D_2__Deltaproteobacteria; D_3__NB1-j; D_4__uncultured bacterium; D_5__uncultured bacterium; D_6__uncultured bacterium	0.0125979	0	0.0125979	0	0
Otu3589	D_0__Bacteria; D_1__Proteobacteria; D_2__Deltaproteobacteria; D_3__NB1-j; Ambiguous_taxa; Ambiguous_taxa; Ambiguous_taxa	0.0125979	0	0.0125979	0	0
Otu3363	D_0__Bacteria; D_1__Proteobacteria; D_2__Deltaproteobacteria; D_3__Bdellovibrionales; D_4__Bacteriovoracaceae; D_5__Peredibacter	0.0125875	0.000890596	0.00193813	0.00294874	0.00681002
Otu1540	D_0__Bacteria; D_1__Proteobacteria; D_2__Gammaproteobacteria; D_3__Pseudomonadales; D_4__Moraxellaceae; D_5__Psychrobacter	0.0125622	0.000296865	0	0.0102223	0.00204301
Otu1506	D_0__Bacteria; D_1__Proteobacteria; D_2__Gammaproteobacteria; D_3__Alteromonadales; D_4__Colwelliaceae; D_5__Colwellia	0.0125115	0.00831223	0.00419929	0	0
Otu1702	D_0__Bacteria; D_1__Bacteroidetes; D_2__Sphingobacteriia; D_3__Sphingobacteriales; D_4__uncultured	0.0124906	0.000593731	0.000969067	0.0078633	0.00306451
Otu3489	D_0__Bacteria; D_1__Bacteroidetes; D_2__Flavobacteriia; D_3__Flavobacteriales; D_4__NS9 marine group; Ambiguous_taxa; Ambiguous_taxa	0.0124327	0.000890596	0.000646045	0	0.010896
Otu1456	D_0__Bacteria; D_1__Proteobacteria; D_2__Alphaproteobacteria; D_3__Alphaproteobacteria Incertae Sedis; D_4__Unknown Family; D_5__uncultured; D_6__uncultured bacterium	0.0123561	0.00148433	0.000323022	0.00884622	0.0017025
Otu2346	D_0__Bacteria; D_1__Proteobacteria; D_2__Gammaproteobacteria; D_3__Oceanospirillales; D_4__Oceanospirillaceae; D_5__Oleispira	0.0123549	0.00178119	0.00258418	0.0011795	0.00681002
Otu1773	D_0__Bacteria; D_1__Planctomycetes; D_2__OM190; D_3__uncultured bacterium; D_4__uncultured bacterium; D_5__uncultured bacterium; D_6__uncultured bacterium	0.0123321	0.00237492	0.00839858	0.000196583	0.001362
Otu3321	D_0__Bacteria; D_1__Proteobacteria; D_2__Gammaproteobacteria	0.0123298	0.00118746	0.00226116	0.00275216	0.00612902
Otu2288	D_0__Bacteria; D_1__Saccharibacteria; D_2__uncultured bacterium; D_3__uncultured bacterium; D_4__uncultured bacterium; D_5__uncultured bacterium; D_6__uncultured bacterium	0.0123255	0.00356238	0.0058144	0.00294874	0
Otu1324	D_0__Bacteria; D_1__Proteobacteria; D_2__Gammaproteobacteria; D_3__Oceanospirillales; D_4__Oceanospirillaceae; D_5__Pseudohongiella	0.0123146	0	0.000323022	0.0119915	0
Otu2227	D_0__Bacteria; D_1__Proteobacteria; D_2__Alphaproteobacteria; D_3__Rhodobacterales; D_4__Rhodobacteraceae	0.0122864	0	0.000323022	0.00923938	0.00272401
Otu2550	D_0__Bacteria; D_1__Proteobacteria; D_2__Deltaproteobacteria; D_3__Bdellovibrionales; D_4__Bdellovibrionaceae; D_5__Bdellovibrio; Ambiguous_taxa	0.0122751	0.00118746	0.00904463	0	0.00204301
Otu1568	D_0__Bacteria; D_1__Proteobacteria; D_2__Gammaproteobacteria; D_3__KI89A clade	0.0122749	0	0.0122749	0	0
Otu2085	D_0__Bacteria; D_1__Proteobacteria; D_2__Gammaproteobacteria; D_3__Chromatiales; D_4__Granulosicoccaceae; D_5__Granulosicoccus	0.0122749	0	0.0122749	0	0
Otu4726	D_0__Bacteria; D_1__Actinobacteria; D_2__Acidimicrobiia; D_3__Acidimicrobiales; D_4__Acidimicrobiales Incertae Sedis; D_5__Candidatus Microthrix	0.0122662	0.000296865	0.0116288	0	0.000340501
Otu1683	Unassigned	0.012258	0	0	0	0.012258
Otu2136	D_0__Bacteria; D_1__Proteobacteria; D_2__Epsilonproteobacteria; D_3__Campylobacterales; D_4__Campylobacteraceae; D_5__Sulfurospirillum; Ambiguous_taxa	0.0122513	0.00356238	0.00355325	0.00275216	0.00238351
Otu1831	D_0__Bacteria; D_1__Acidobacteria; D_2__Subgroup 9	0.0122487	0.000296865	0.0119518	0	0
Otu3788	D_0__Bacteria; D_1__Proteobacteria; D_2__Gammaproteobacteria; D_3__Cellvibrionales; D_4__Cellvibrionaceae; D_5__uncultured	0.0122359	0.00445298	0.00193813	0.00550431	0.000340501
Otu1534	D_0__Bacteria; D_1__Proteobacteria; D_2__Deltaproteobacteria; D_3__NB1-j; D_4__uncultured bacterium; D_5__uncultured bacterium; D_6__uncultured bacterium	0.0122225	0.000593731	0.0116288	0	0
Otu3669	Unassigned	0.0122144	0.000296865	0	0	0.0119175
Otu2071	D_0__Bacteria; D_1__Nitrospinae; D_2__Nitrospinia; D_3__Nitrospinales; D_4__Nitrospinaceae	0.0122062	0.000296865	0.0103367	0.00157266	0
Otu1632	D_0__Bacteria; D_1__Bacteroidetes; D_2__Flavobacteriia; D_3__Flavobacteriales; D_4__Flavobacteriaceae	0.0121935	0.000296865	0	0.00747014	0.00442651
Otu3683	D_0__Bacteria; D_1__Proteobacteria; D_2__Deltaproteobacteria; D_3__NB1-j; D_4__uncultured bacterium; D_5__uncultured bacterium; D_6__uncultured bacterium	0.0121895	0.00118746	0.0029072	0.00196583	0.00612902
Otu1940	D_0__Bacteria; D_1__Proteobacteria; D_2__Deltaproteobacteria; D_3__Bdellovibrionales; D_4__Bdellovibrionaceae; D_5__OM27 clade; D_6__uncultured bacterium	0.0121642	0.000593731	0.000969067	0.00923938	0.001362
Otu3188	D_0__Bacteria; D_1__Proteobacteria; D_2__Gammaproteobacteria; D_3__Alteromonadales; D_4__Pseudoalteromonadaceae; D_5__Pseudoalteromonas	0.012164	0.000593731	0.000646045	0.00275216	0.00817202
Otu2514	D_0__Bacteria; D_1__Bacteroidetes; D_2__Flavobacteriia; D_3__Flavobacteriales; D_4__Schleiferiaceae; D_5__Schleiferia; Ambiguous_taxa	0.012073	0	0.00419929	0.00412823	0.00374551
Otu1221	D_0__Bacteria; D_1__Saccharibacteria; D_2__uncultured bacterium; D_3__uncultured bacterium; D_4__uncultured bacterium; D_5__uncultured bacterium; D_6__uncultured bacterium	0.0120598	0.00178119	0.000646045	0.00963255	0
Otu1947	D_0__Bacteria; D_1__Proteobacteria; D_2__Deltaproteobacteria; D_3__Myxococcales; D_4__BIrii41	0.0120395	0	0.0113058	0.000393165	0.000340501
Otu2664	D_0__Bacteria; D_1__Proteobacteria; D_2__Gammaproteobacteria; D_3__Alteromonadales; D_4__Psychromonadaceae; D_5__Psychromonas; Ambiguous_taxa	0.0120324	0.00118746	0.00678347	0.00235899	0.0017025
Otu2306	D_0__Bacteria; D_1__Proteobacteria; D_2__Alphaproteobacteria; D_3__Rhodobacterales; D_4__Rhodobacteraceae; D_5__Falsirhodobacter; Ambiguous_taxa	0.0120308	0.000296865	0.0106597	0.000393165	0.000681002
Otu4019	D_0__Bacteria; D_1__Proteobacteria; D_2__Deltaproteobacteria; D_3__Bdellovibrionales; D_4__Bacteriovoracaceae; D_5__uncultured	0.0120279	0.00118746	0.00161511	0.0078633	0.001362
Otu1037	D_0__Bacteria; D_1__Actinobacteria; D_2__Actinobacteria; D_3__Micrococcales; D_4__Intrasporangiaceae; D_5__Ornithinimicrobium; Ambiguous_taxa	0.0120217	0.000296865	0.000323022	0.0114018	0
Otu2172	D_0__Bacteria; D_1__Proteobacteria; D_2__Gammaproteobacteria; D_3__E01-9C-26 marine group; Ambiguous_taxa; Ambiguous_taxa; Ambiguous_taxa	0.01196	0	0.000323022	0.0106155	0.0010215
Otu2264	D_0__Bacteria; D_1__Proteobacteria; D_2__Gammaproteobacteria; D_3__Oceanospirillales; D_4__Oceanospirillaceae; D_5__Pseudohongiella	0.0119518	0	0.0119518	0	0
Otu2348	D_0__Bacteria; D_1__Chloroflexi; D_2__Anaerolineae; D_3__Anaerolineales; D_4__Anaerolineaceae; D_5__uncultured; D_6__uncultured organism	0.0119518	0	0.0119518	0	0
Otu4839	D_0__Bacteria; D_1__Proteobacteria; D_2__Deltaproteobacteria; D_3__Bdellovibrionales; D_4__Bdellovibrionaceae; D_5__OM27 clade	0.0119439	0.00742163	0.00452231	0	0
Otu4840	D_0__Bacteria; D_1__Proteobacteria; D_2__Gammaproteobacteria; D_3__Gammaproteobacteria Incertae Sedis; D_4__Unknown Family; D_5__uncultured; Ambiguous_taxa	0.0119296	0	0.00613743	0.00511115	0.000681002
Otu1946	D_0__Bacteria; D_1__Proteobacteria; D_2__Gammaproteobacteria; D_3__Oceanospirillales; D_4__Oceanospirillaceae; D_5__Pseudohongiella	0.0118825	0.00445298	0.00742952	0	0
Otu1884	D_0__Bacteria; D_1__Proteobacteria; D_2__Deltaproteobacteria; D_3__NB1-j; D_4__uncultured bacterium; D_5__uncultured bacterium; D_6__uncultured bacterium	0.0118669	0	0.00872161	0.00314532	0
Otu3557	D_0__Bacteria; D_1__Proteobacteria; D_2__Epsilonproteobacteria; D_3__Campylobacterales; D_4__Helicobacteraceae; D_5__Sulfurovum	0.0118353	0.00178119	0.00226116	0.000982913	0.00681002
Otu3923	D_0__Bacteria; D_1__Actinobacteria; D_2__Acidimicrobiia; D_3__Acidimicrobiales; D_4__uncultured; Ambiguous_taxa; Ambiguous_taxa	0.0117437	0	0.00710649	0.00157266	0.00306451
Otu3523	D_0__Bacteria; D_1__Proteobacteria; D_2__Gammaproteobacteria; D_3__Alteromonadales	0.0116523	0.00474985	0.00484534	0.00137608	0.000681002
Otu2498	D_0__Bacteria; D_1__Proteobacteria; D_2__Deltaproteobacteria; D_3__NB1-j; Ambiguous_taxa; Ambiguous_taxa; Ambiguous_taxa	0.0116463	0	0.0113058	0	0.000340501
Otu2086	D_0__Bacteria; D_1__Bacteroidetes; D_2__Sphingobacteriia; D_3__Sphingobacteriales; D_4__uncultured	0.0116212	0.00178119	0.00193813	0.00688039	0.0010215
Otu1739	D_0__Bacteria; D_1__Bacteroidetes; D_2__Sphingobacteriia; D_3__Sphingobacteriales; D_4__Sphingobacteriaceae; D_5__Pedobacter; Ambiguous_taxa	0.0116024	0.000593731	0	0.0110086	0
Otu1700	D_0__Bacteria; D_1__Firmicutes; D_2__Negativicutes; D_3__Selenomonadales; D_4__Acidaminococcaceae; D_5__uncultured	0.0115948	0.0077185	0.00387627	0	0
Otu2122	D_0__Bacteria; D_1__Proteobacteria; D_2__Gammaproteobacteria; D_3__Cellvibrionales; D_4__Spongiibacteraceae; D_5__BD1-7 clade	0.011577	0	0	0	0.011577
Otu4057	D_0__Bacteria; D_1__Proteobacteria; D_2__Gammaproteobacteria; D_3__Xanthomonadales; D_4__JTB255 marine benthic group	0.0115527	0.000296865	0.00742952	0.00314532	0.000681002
Otu2228	D_0__Bacteria; D_1__Proteobacteria; D_2__Alphaproteobacteria; D_3__Rhizobiales	0.0115452	0.000296865	0.00516836	0.00471798	0.001362
Otu2602	D_0__Bacteria; D_1__Actinobacteria; D_2__Acidimicrobiia; D_3__Acidimicrobiales; D_4__Sva0996 marine group; D_5__uncultured bacterium; D_6__uncultured bacterium	0.0115198	0	0.0109828	0.000196583	0.000340501
Otu1563	D_0__Bacteria; D_1__Proteobacteria; D_2__Deltaproteobacteria; D_3__NB1-j; D_4__uncultured bacterium; D_5__uncultured bacterium; D_6__uncultured bacterium	0.0115024	0	0.0113058	0.000196583	0
Otu1383	D_0__Bacteria; D_1__Firmicutes; D_2__Bacilli; D_3__Lactobacillales; D_4__Carnobacteriaceae; D_5__Trichococcus; D_6__uncultured bacterium	0.0114196	0.00237492	0.00904463	0	0
Otu1535	D_0__Bacteria; D_1__Bacteroidetes; D_2__Sphingobacteriia; D_3__Sphingobacteriales; D_4__Sphingobacteriaceae; D_5__Pedobacter; Ambiguous_taxa	0.0114054	0	0.000646045	0.0104189	0.000340501
Otu1339	D_0__Bacteria; D_1__Proteobacteria; D_2__Deltaproteobacteria; D_3__Bdellovibrionales; D_4__Bdellovibrionaceae; D_5__OM27 clade	0.0114025	0.00623417	0.00516836	0	0
Otu1170	D_0__Bacteria; D_1__Saccharibacteria; D_2__uncultured bacterium; D_3__uncultured bacterium; D_4__uncultured bacterium; D_5__uncultured bacterium; D_6__uncultured bacterium	0.0113959	0.00118746	0.000969067	0.00923938	0
Otu4494	D_0__Bacteria; D_1__Proteobacteria; D_2__Gammaproteobacteria; D_3__Oceanospirillales; D_4__Oceanospirillaceae; D_5__Balneatrix; D_6__uncultured marine bacterium	0.0113933	0.000296865	0.000969067	0.0057009	0.00442651
Otu1069	D_0__Bacteria; D_1__Proteobacteria; D_2__Deltaproteobacteria; D_3__Myxococcales; D_4__Nannocystaceae; D_5__Nannocystis	0.0113639	0.00267179	0.00161511	0.00707697	0
Otu4572	D_0__Bacteria; D_1__Bacteroidetes; D_2__Flavobacteriia; D_3__Flavobacteriales; D_4__Flavobacteriaceae	0.0113498	0.00148433	0.00646045	0	0.00340501
Otu2090	D_0__Bacteria; D_1__Proteobacteria; D_2__Gammaproteobacteria	0.0113415	0.00712477	0.00387627	0	0.000340501
Otu1857	D_0__Bacteria; D_1__Actinobacteria; D_2__Acidimicrobiia; D_3__Acidimicrobiales; D_4__Acidimicrobiaceae; D_5__uncultured; D_6__uncultured bacterium	0.0113407	0	0.0106597	0	0.000681002
Otu1906	D_0__Bacteria; D_1__Firmicutes; D_2__Bacilli; D_3__Bacillales; D_4__Planococcaceae	0.0113381	0.000890596	0.00258418	0.0078633	0
Otu2663	D_0__Bacteria; D_1__Proteobacteria; D_2__Alphaproteobacteria; D_3__Rhizobiales; D_4__Phyllobacteriaceae; D_5__Pseudahrensia	0.0113178	0	0.00129209	0.0100257	0
Otu2770	D_0__Bacteria; D_1__Gracilibacteria; D_2__uncultured bacterium; D_3__uncultured bacterium; D_4__uncultured bacterium; D_5__uncultured bacterium; D_6__uncultured bacterium	0.0113154	0.00593731	0.00129209	0	0.00408601
Otu1729	D_0__Bacteria; D_1__Bacteroidetes; D_2__Flavobacteriia; D_3__Flavobacteriales; D_4__Cryomorphaceae; D_5__Fluviicola; Ambiguous_taxa	0.0113067	0.00504671	0.00484534	0.000393165	0.0010215
Otu1937	D_0__Bacteria; D_1__Acidobacteria; D_2__Solibacteres; D_3__Solibacterales; D_4__Solibacteraceae (Subgroup 3); D_5__PAUC26f; Ambiguous_taxa	0.0113058	0	0.0113058	0	0
Otu2052	D_0__Bacteria; D_1__Proteobacteria; D_2__Gammaproteobacteria; D_3__Oceanospirillales; D_4__Oceanospirillaceae; D_5__Pseudohongiella; D_6__uncultured gamma proteobacterium	0.0113058	0	0.0113058	0	0
Otu2897	D_0__Bacteria; D_1__Proteobacteria; D_2__Gammaproteobacteria; D_3__Oceanospirillales; D_4__Alcanivoracaceae; D_5__Kangiella; D_6__uncultured bacterium	0.0113058	0	0.0113058	0	0
Otu3209	D_0__Bacteria; D_1__Proteobacteria; D_2__Epsilonproteobacteria; D_3__Campylobacterales; D_4__Helicobacteraceae	0.0113033	0.00356238	0.0029072	0.00176924	0.00306451
Otu1346	D_0__Bacteria; D_1__Firmicutes; D_2__Clostridia; D_3__Clostridiales; D_4__Peptostreptococcaceae	0.0112818	0.000890596	0.00193813	0.00845305	0
Otu2520	D_0__Bacteria; D_1__Proteobacteria; D_2__Deltaproteobacteria; D_3__NB1-j; D_4__uncultured bacterium; D_5__uncultured bacterium; D_6__uncultured bacterium	0.0112798	0.000890596	0.00936765	0	0.0010215
Otu3464	D_0__Bacteria; D_1__Firmicutes; D_2__Clostridia; D_3__Clostridiales; D_4__Lachnospiraceae	0.011242	0.00534358	0.00452231	0.00137608	0
Otu2283	D_0__Bacteria; D_1__Bacteroidetes; D_2__Flavobacteriia; D_3__Flavobacteriales; D_4__Flavobacteriaceae; D_5__Maribacter; Ambiguous_taxa	0.0111968	0	0.0106597	0.000196583	0.000340501
Otu4921	D_0__Bacteria; D_1__Actinobacteria; D_2__Acidimicrobiia; D_3__Acidimicrobiales; D_4__uncultured; Ambiguous_taxa; Ambiguous_taxa	0.011193	0	0.00904463	0.00078633	0.001362
Otu2694	D_0__Bacteria; D_1__Proteobacteria; D_2__Gammaproteobacteria; D_3__Oceanospirillales; D_4__OM182 clade; D_5__uncultured gamma proteobacterium; D_6__uncultured gamma proteobacterium	0.0110922	0.000890596	0.00226116	0.00589748	0.00204301
Otu2036	D_0__Bacteria; D_1__Saccharibacteria; D_2__uncultured bacterium; D_3__uncultured bacterium; D_4__uncultured bacterium; D_5__uncultured bacterium; D_6__uncultured bacterium	0.0110814	0.00178119	0.0058144	0.00314532	0.000340501
Otu2233	D_0__Bacteria; D_1__Proteobacteria; D_2__Gammaproteobacteria; D_3__Gammaproteobacteria Incertae Sedis; D_4__Unknown Family; D_5__uncultured; D_6__uncultured bacterium	0.0110686	0	0.00129209	0.00943597	0.000340501
Otu1984	D_0__Bacteria; D_1__Proteobacteria; D_2__Alphaproteobacteria; D_3__Rhizobiales; D_4__Rhodobiaceae; D_5__Rhodobium	0.0110208	0.00326552	0.00387627	0.00353849	0.000340501
Otu4875	D_0__Bacteria; D_1__Proteobacteria; D_2__Gammaproteobacteria; D_3__EC3; D_4__uncultured bacterium; D_5__uncultured bacterium; D_6__uncultured bacterium	0.0109982	0.00148433	0.00355325	0.00255557	0.00340501
Otu1703	D_0__Bacteria; D_1__Proteobacteria; D_2__Gammaproteobacteria; D_3__Oceanospirillales; D_4__Oceanospirillaceae	0.0109876	0.00237492	0.00807556	0.000196583	0.000340501
Otu1432	D_0__Bacteria; D_1__Bacteroidetes; D_2__Flavobacteriia; D_3__Flavobacteriales; D_4__Cryomorphaceae; D_5__uncultured; D_6__uncultured bacterium	0.0109828	0	0.0109828	0	0
Otu4774	D_0__Bacteria; D_1__Proteobacteria; D_2__Alphaproteobacteria; D_3__Rhodospirillales; D_4__Rhodospirillaceae; D_5__uncultured; D_6__uncultured bacterium	0.0109597	0.00207806	0.00193813	0.00353849	0.00340501
Otu2985	D_0__Bacteria; D_1__Nitrospinae; D_2__Nitrospinia; D_3__Nitrospinales; D_4__Nitrospinaceae; D_5__Nitrospina; D_6__uncultured bacterium	0.0109566	0.000296865	0.0106597	0	0
Otu4566	D_0__Bacteria; D_1__Proteobacteria; D_2__Gammaproteobacteria; D_3__Cellvibrionales; D_4__Spongiibacteraceae; D_5__BD1-7 clade; D_6__uncultured bacterium	0.010935	0.000296865	0.00839858	0.000196583	0.00204301
Otu1149	D_0__Bacteria; D_1__Actinobacteria; D_2__Acidimicrobiia; D_3__Acidimicrobiales; D_4__uncultured	0.0109313	0.00207806	0.000323022	0.00648723	0.00204301
Otu2826	D_0__Bacteria; D_1__Lentisphaerae; D_2__Lentisphaeria; D_3__Lentisphaerales; D_4__Lentisphaeraceae; D_5__Lentisphaera; Ambiguous_taxa	0.010931	0.00237492	0.00646045	0.000393165	0.0017025
Otu2905	D_0__Bacteria; D_1__Proteobacteria; D_2__Gammaproteobacteria; D_3__Oceanospirillales; D_4__OM182 clade	0.0109178	0.00296865	0.00775254	0.000196583	0
Otu1299	Unassigned	0.0109008	0.0068279	0.00387627	0.000196583	0
Otu2019	D_0__Bacteria; D_1__Firmicutes; D_2__Bacilli; D_3__Lactobacillales; D_4__Carnobacteriaceae; D_5__Atopostipes; D_6__uncultured bacterium	0.0108666	0.00593731	0.00355325	0.00137608	0
Otu2691	D_0__Bacteria; D_1__Bacteroidetes; D_2__Bacteroidia; D_3__Bacteroidales; D_4__Bacteroidaceae; D_5__Bacteroides; D_6__uncultured bacterium	0.0108528	0.00593731	0.00452231	0.000393165	0
Otu3587	D_0__Bacteria; D_1__Bacteroidetes; D_2__Flavobacteriia; D_3__Flavobacteriales; D_4__Flavobacteriaceae	0.0108524	0.00534358	0.00516836	0	0.000340501
Otu2186	D_0__Bacteria; D_1__Proteobacteria; D_2__Gammaproteobacteria; D_3__Alteromonadales; D_4__Psychromonadaceae; D_5__Psychromonas	0.0108493	0.00653104	0.00226116	0.00137608	0.000681002
Otu3369	D_0__Bacteria; D_1__Firmicutes; D_2__Clostridia; D_3__Clostridiales; D_4__Lachnospiraceae; D_5__uncultured; D_6__uncultured bacterium	0.0108311	0.00534358	0.00387627	0.000589748	0.0010215
Otu2881	D_0__Bacteria; D_1__Proteobacteria	0.0108152	0.000296865	0.0058144	0.0033419	0.001362
Otu2313	D_0__Bacteria; D_1__Firmicutes; D_2__Bacilli; D_3__Lactobacillales; D_4__Aerococcaceae	0.0107478	0.00653104	0.00387627	0	0.000340501
Otu4702	D_0__Bacteria; D_1__Proteobacteria; D_2__Alphaproteobacteria; D_3__Rhodospirillales; D_4__Rhodospirillaceae; D_5__uncultured	0.0107407	0.00445298	0.0029072	0.00235899	0.0010215
Otu2007	D_0__Bacteria; D_1__Actinobacteria; D_2__Acidimicrobiia; D_3__Acidimicrobiales	0.0107341	0.000296865	0.00419929	0.00589748	0.000340501
Otu3002	D_0__Bacteria; D_1__Proteobacteria; D_2__Gammaproteobacteria	0.010709	0.00385925	0.00484534	0.000982913	0.0010215
Otu2402	D_0__Bacteria; D_1__Proteobacteria; D_2__Alphaproteobacteria; D_3__Rhodobacterales; D_4__Rhodobacteraceae; D_5__uncultured	0.0106952	0.00118746	0.00775254	0.000393165	0.001362
Otu3296	D_0__Bacteria; D_1__Bacteroidetes; D_2__Flavobacteriia; D_3__Flavobacteriales; D_4__Flavobacteriaceae	0.0106908	0.00267179	0.00646045	0.000196583	0.001362
Otu3933	D_0__Bacteria; D_1__Proteobacteria; D_2__Deltaproteobacteria; D_3__Bdellovibrionales; D_4__Bdellovibrionaceae; D_5__OM27 clade; Ambiguous_taxa	0.0106835	0.00534358	0.00323022	0.00176924	0.000340501
Otu4634	D_0__Bacteria; D_1__Proteobacteria; D_2__Alphaproteobacteria; D_3__Rhodospirillales; D_4__Rhodospirillaceae; D_5__uncultured	0.0106749	0.00564044	0.00258418	0.00176924	0.000681002
Otu3710	D_0__Bacteria; D_1__Proteobacteria; D_2__Alphaproteobacteria; D_3__Alphaproteobacteria Incertae Sedis; D_4__Unknown Family; D_5__uncultured; D_6__uncultured bacterium	0.0106614	0.00356238	0.00484534	0.00157266	0.000681002
Otu4803	D_0__Bacteria; D_1__Proteobacteria; D_2__Gammaproteobacteria; D_3__Gammaproteobacteria Incertae Sedis; D_4__Unknown Family; D_5__Thiohalophilus	0.0106609	0	0	0.00078633	0.00987453
Otu1668	D_0__Bacteria; D_1__Cyanobacteria; D_2__Melainabacteria; D_3__Obscuribacterales; D_4__uncultured bacterium; D_5__uncultured bacterium; D_6__uncultured bacterium	0.0106597	0	0.0106597	0	0
Otu2537	D_0__Bacteria; D_1__Planctomycetes; D_2__OM190; D_3__uncultured bacterium; D_4__uncultured bacterium; D_5__uncultured bacterium; D_6__uncultured bacterium	0.0106597	0	0.0106597	0	0
Otu1878	D_0__Bacteria; D_1__Proteobacteria; D_2__Deltaproteobacteria; D_3__Bdellovibrionales; D_4__Bdellovibrionaceae; D_5__OM27 clade; D_6__uncultured delta proteobacterium	0.0106466	0.000890596	0.00323022	0.00550431	0.0010215
Otu2301	D_0__Bacteria; D_1__Proteobacteria; D_2__Gammaproteobacteria; D_3__Vibrionales; D_4__Vibrionaceae; D_5__Vibrio	0.0106456	0.000296865	0.000323022	0.0100257	0
Otu2371	D_0__Bacteria; D_1__Actinobacteria; D_2__Acidimicrobiia; D_3__Acidimicrobiales	0.0106316	0.00385925	0.00387627	0.00255557	0.000340501
Otu2979	D_0__Bacteria; D_1__Proteobacteria; D_2__Betaproteobacteria; D_3__Burkholderiales; D_4__Comamonadaceae; D_5__uncultured	0.0106155	0	0	0.0106155	0
Otu1439	D_0__Bacteria; D_1__Proteobacteria; D_2__Gammaproteobacteria	0.0106074	0.000593731	0.0100137	0	0
Otu2390	D_0__Bacteria; D_1__Proteobacteria; D_2__Deltaproteobacteria; D_3__Bdellovibrionales; D_4__Bdellovibrionaceae; D_5__OM27 clade; D_6__uncultured bacterium	0.010575	0.000593731	0.0058144	0.00314532	0.0010215
Otu4161	D_0__Bacteria; D_1__Proteobacteria; D_2__Gammaproteobacteria; D_3__Xanthomonadales; D_4__JTB255 marine benthic group; D_5__uncultured bacterium; D_6__uncultured bacterium	0.0105701	0.000890596	0.00678347	0.00255557	0.000340501
Otu4577	D_0__Bacteria; D_1__Bacteroidetes; D_2__Flavobacteriia; D_3__Flavobacteriales	0.0105641	0.000593731	0.00452231	0	0.00544801
Otu3016	D_0__Bacteria; D_1__Proteobacteria; D_2__Deltaproteobacteria; D_3__Myxococcales; D_4__P3OB-42; D_5__uncultured bacterium; D_6__uncultured bacterium	0.0105431	0.00118746	0.00193813	0.00707697	0.000340501
Otu3439	D_0__Bacteria; D_1__Bacteroidetes; D_2__Sphingobacteriia; D_3__Sphingobacteriales; D_4__Lentimicrobiaceae	0.0105429	0.00474985	0.00452231	0.000589748	0.000681002
Otu4159	Unassigned	0.0105348	0.000296865	0.00807556	0.00216241	0
Otu4165	D_0__Bacteria; D_1__Proteobacteria; D_2__Deltaproteobacteria; D_3__Bdellovibrionales; D_4__Bacteriovoracaceae; D_5__Peredibacter; D_6__uncultured bacterium	0.0105339	0.00445298	0.00452231	0.000196583	0.001362
Otu1853	D_0__Bacteria; D_1__Proteobacteria; D_2__Betaproteobacteria; D_3__Burkholderiales	0.0105192	0.000296865	0	0.0102223	0
Otu2309	D_0__Bacteria; D_1__Bacteroidetes; D_2__Flavobacteriia; D_3__Flavobacteriales; D_4__Flavobacteriaceae; D_5__Chryseobacterium; Ambiguous_taxa	0.0105192	0.000296865	0	0.0102223	0
Otu3072	D_0__Bacteria; D_1__Proteobacteria; D_2__Alphaproteobacteria; D_3__Rickettsiales; D_5__marine metagenome; D_6__marine metagenome	0.0105155	0.00178119	0.00226116	0.00511115	0.001362
Otu1767	D_0__Bacteria; D_1__Actinobacteria; D_2__Acidimicrobiia; D_3__Acidimicrobiales	0.0104972	0	0.00549138	0.00432482	0.000681002
Otu2741	D_0__Bacteria; D_1__Proteobacteria; D_2__Deltaproteobacteria; D_3__NB1-j; D_4__uncultured bacterium; D_5__uncultured bacterium; D_6__uncultured bacterium	0.0104941	0.00207806	0.00807556	0	0.000340501
Otu3878	D_0__Bacteria; D_1__Planctomycetes; D_2__Pla4 lineage; D_3__uncultured bacterium; D_4__uncultured bacterium; D_5__uncultured bacterium; D_6__uncultured bacterium	0.0104841	0.00118746	0.00516836	0.00412823	0
Otu2852	D_0__Bacteria; D_1__Proteobacteria; D_2__Gammaproteobacteria; D_3__Thiotrichales; D_4__Thiotrichales Incertae Sedis; D_5__Caedibacter	0.0104776	0.00979656	0	0	0.000681002
Otu4072	D_0__Bacteria; D_1__Bacteroidetes; D_2__Flavobacteriia; D_3__Flavobacteriales; D_4__Flavobacteriaceae	0.0104739	0.000890596	0.000323022	0.00176924	0.00749102
Otu2545	D_0__Bacteria; D_1__Bacteroidetes; D_2__Flavobacteriia; D_3__Flavobacteriales; D_4__Cryomorphaceae; D_5__uncultured; D_6__uncultured marine bacterium	0.0104645	0.00415612	0.00129209	0.000589748	0.00442651
Otu4853	D_0__Bacteria; D_1__Bacteroidetes; D_2__Flavobacteriia; D_3__Flavobacteriales; D_4__Flavobacteriaceae; D_5__Pseudofulvibacter	0.0104597	0.00653104	0.0029072	0	0.0010215
Otu1757	D_0__Bacteria; D_1__Proteobacteria; D_2__Betaproteobacteria; D_3__Burkholderiales; D_4__Oxalobacteraceae; D_5__Undibacterium	0.0104504	0	0.000323022	0.0057009	0.00442651
Otu1996	D_0__Bacteria; D_1__Proteobacteria; D_2__Deltaproteobacteria; D_3__Myxococcales; D_4__Nannocystaceae; D_5__Nannocystis	0.0104423	0.00118746	0.00710649	0.00078633	0.001362
Otu2804	D_0__Bacteria; D_1__Actinobacteria; D_2__Acidimicrobiia; D_3__Acidimicrobiales; D_4__Sva0996 marine group; D_5__uncultured bacterium; D_6__uncultured bacterium	0.0104244	0.00326552	0.00613743	0	0.0010215
Otu3662	D_0__Bacteria; D_1__Proteobacteria; D_2__Gammaproteobacteria; D_3__Oceanospirillales; D_4__Oceanospirillaceae	0.0104116	0	0	0.000196583	0.010215
Otu1422	D_0__Bacteria; D_1__Bacteroidetes; D_2__Flavobacteriia; D_3__Flavobacteriales; D_4__Flavobacteriaceae	0.0104092	0.000593731	0.00258418	0.00314532	0.00408601
Otu1628	D_0__Bacteria; D_1__Actinobacteria; D_2__Actinobacteria; D_3__Propionibacteriales; D_4__Nocardioidaceae; D_5__Nocardioides	0.010385	0.000593731	0.00355325	0.00589748	0.000340501
Otu2068	D_0__Bacteria; D_1__Planctomycetes; D_2__OM190; D_3__uncultured bacterium; D_4__uncultured bacterium; D_5__uncultured bacterium; D_6__uncultured bacterium	0.0103106	0.000296865	0.0100137	0	0
Otu3128	D_0__Bacteria; D_1__Acidobacteria; D_2__Holophagae; D_3__Subgroup 10; D_4__Sva0725	0.0102518	0	0.00710649	0.00314532	0
Otu2376	D_0__Bacteria; D_1__Proteobacteria; D_2__Gammaproteobacteria; D_3__E01-9C-26 marine group	0.0102407	0	0.00419929	0.0057009	0.000340501
Otu1688	D_0__Bacteria; D_1__Proteobacteria; D_2__Alphaproteobacteria; D_3__Rhizobiales; D_4__Phyllobacteriaceae	0.0102272	0.000593731	0.00452231	0.00511115	0
Otu2632	D_0__Bacteria; D_1__Saccharibacteria; D_2__uncultured bacterium; D_3__uncultured bacterium; D_4__uncultured bacterium; D_5__uncultured bacterium; D_6__uncultured bacterium	0.0102223	0	0	0.0102223	0
Otu4143	D_0__Bacteria; D_1__Proteobacteria; D_2__Gammaproteobacteria; D_3__Alteromonadales; D_4__Alteromonadaceae; D_5__Glaciecola	0.0102151	0.00504671	0.00516836	0	0
Otu4386	D_0__Bacteria; D_1__Actinobacteria; D_2__Acidimicrobiia; D_3__Acidimicrobiales; D_4__uncultured; D_5__uncultured bacterium; D_6__uncultured bacterium	0.0102132	0.00385925	0.000969067	0.0033419	0.00204301
Otu2353	D_0__Bacteria; D_1__Proteobacteria; D_2__Alphaproteobacteria; D_3__Rhodobacterales; D_4__Rhodobacteraceae; D_5__uncultured; D_6__uncultured bacterium	0.0102049	0.00207806	0.00161511	0.00412823	0.00238351
Otu1640	D_0__Bacteria; D_1__Actinobacteria; D_2__Acidimicrobiia; D_3__Acidimicrobiales	0.0101841	0.000296865	0.00969067	0.000196583	0
Otu3665	D_0__Bacteria; D_1__Proteobacteria; D_2__Gammaproteobacteria; D_3__E01-9C-26 marine group	0.0101771	0.00267179	0.000969067	0.00176924	0.00476701
Otu4539	D_0__Bacteria; D_1__Proteobacteria; D_2__Gammaproteobacteria; D_3__Oceanospirillales; D_4__OM182 clade; D_5__uncultured gamma proteobacterium; D_6__uncultured gamma proteobacterium	0.0101536	0.00207806	0.00807556	0	0
Otu1262	D_0__Bacteria; D_1__Bacteroidetes; D_2__Flavobacteriia; D_3__Flavobacteriales; D_4__Flavobacteriaceae	0.0101505	0.000296865	0	0.00747014	0.00238351
Otu3979	D_0__Bacteria; D_1__Proteobacteria; D_2__Alphaproteobacteria; D_3__Rhodobacterales; D_4__Rhodobacteraceae	0.010144	0.00237492	0.0029072	0.0045214	0.000340501
Otu1942	D_0__Bacteria; D_1__Proteobacteria; D_2__Gammaproteobacteria; D_3__Oceanospirillales; D_4__OM182 clade; D_5__uncultured bacterium; D_6__uncultured bacterium	0.0101318	0.000593731	0.00193813	0.00589748	0.0017025
Otu4719	D_0__Bacteria; D_1__Actinobacteria; D_2__Acidimicrobiia; D_3__Acidimicrobiales; D_4__Iamiaceae; D_5__Iamia; Ambiguous_taxa	0.0100851	0.000296865	0.00646045	0.00196583	0.001362
Otu3045	D_0__Bacteria; D_1__Bacteroidetes; D_2__Flavobacteriia; D_3__Flavobacteriales; D_4__Cryomorphaceae; D_5__uncultured	0.0100713	0.000296865	0.00742952	0.000982913	0.001362
Otu2926	D_0__Bacteria; D_1__Bacteroidetes; D_2__Flavobacteriia; D_3__Flavobacteriales; D_4__Flavobacteriaceae; D_5__Polaribacter 4; Ambiguous_taxa	0.0100607	0	0	0.00393165	0.00612902
Otu2049	D_0__Bacteria; D_1__Proteobacteria; D_2__Gammaproteobacteria; D_3__Gammaproteobacteria Incertae Sedis; D_4__Unknown Family; D_5__uncultured; D_6__uncultured gamma proteobacterium	0.0100327	0.000296865	0.00742952	0.00196583	0.000340501
Otu1387	D_0__Bacteria; D_1__Actinobacteria; D_2__Actinobacteria; D_3__Corynebacteriales; D_4__Nocardiaceae; D_5__Rhodococcus	0.0100257	0	0	0.0100257	0
Otu2021	D_0__Bacteria; D_1__Acidobacteria; D_2__Subgroup 26; D_3__uncultured bacterium; D_4__uncultured bacterium; D_5__uncultured bacterium; D_6__uncultured bacterium	0.0100137	0	0.0100137	0	0
Otu1916	D_0__Bacteria; D_1__Acidobacteria; D_2__Holophagae; D_3__Subgroup 10; D_4__CA002; D_5__uncultured bacterium; D_6__uncultured bacterium	0.0100077	0.000296865	0.00549138	0.00353849	0.000681002
Otu2126	D_0__Bacteria; D_1__Proteobacteria; D_2__Gammaproteobacteria; D_3__E01-9C-26 marine group; D_4__uncultured bacterium; D_5__uncultured bacterium; D_6__uncultured bacterium	0.00998395	0	0.00193813	0.00668381	0.001362
Otu2294	D_0__Bacteria; D_1__Bacteroidetes; D_2__Flavobacteriia; D_3__Flavobacteriales; D_4__Flavobacteriaceae; D_5__Confluentibacter	0.00996284	0	0.00161511	0.00766672	0.000681002
Otu1159	D_0__Bacteria; D_1__Actinobacteria; D_2__Actinobacteria; D_3__Frankiales; D_4__Sporichthyaceae	0.00993431	0.000890596	0.00452231	0.0045214	0
Otu1078	D_0__Bacteria; D_1__Chloroflexi; D_2__Caldilineae; D_3__Caldilineales; D_4__Caldilineaceae; D_5__uncultured; D_6__uncultured bacterium	0.00993186	0.000593731	0.00226116	0.00707697	0
Otu2470	D_0__Bacteria; D_1__Bacteroidetes; D_2__Flavobacteriia; D_3__Flavobacteriales; D_4__NS9 marine group; D_5__uncultured bacterium; D_6__uncultured bacterium	0.00992807	0.00415612	0.00419929	0.00157266	0
Otu2523	D_0__Bacteria; D_1__Proteobacteria; D_2__Alphaproteobacteria; D_3__Rhodobacterales; D_4__Rhodobacteraceae; D_5__uncultured	0.00991821	0.00474985	0.00516836	0	0
Otu1939	D_0__Bacteria; D_1__Proteobacteria; D_2__Gammaproteobacteria; D_3__Alteromonadales; D_4__Alteromonadaceae; D_5__Alteromonas	0.00991052	0.000593731	0.000969067	0.00766672	0.000681002
Otu1879	D_0__Bacteria; D_1__Acidobacteria; D_2__Holophagae; D_3__Subgroup 10; D_4__TK85; D_5__uncultured bacterium; D_6__uncultured bacterium	0.0098448	0	0.00807556	0.00176924	0
Otu1289	D_0__Bacteria; D_1__Bacteroidetes; D_2__Flavobacteriia; D_3__Flavobacteriales; D_4__Flavobacteriaceae; D_5__Polaribacter 2	0.00976239	0	0	0.00805989	0.0017025
Otu1425	D_0__Bacteria; D_1__Proteobacteria; D_2__Deltaproteobacteria; D_3__Bdellovibrionales; D_4__Bdellovibrionaceae; D_5__Bdellovibrio; Ambiguous_taxa	0.00975226	0.000890596	0.00710649	0.000393165	0.001362
Otu2130	D_0__Bacteria; D_1__Peregrinibacteria	0.00974452	0.00356238	0.00193813	0.0011795	0.00306451
Otu1928	D_0__Bacteria; D_1__Proteobacteria; D_2__Gammaproteobacteria; D_3__HTA4; D_4__uncultured bacterium; D_5__uncultured bacterium; D_6__uncultured bacterium	0.00973283	0.000296865	0	0.00943597	0
Otu1532	D_0__Bacteria; D_1__Proteobacteria; D_2__Deltaproteobacteria; D_3__SAR324 clade(Marine group B); D_4__uncultured bacterium; D_5__uncultured bacterium; D_6__uncultured bacterium	0.00971378	0.00415612	0.00355325	0.000982913	0.0010215
Otu2709	D_0__Bacteria; D_1__Proteobacteria; D_2__Deltaproteobacteria; D_3__NB1-j; D_4__uncultured bacterium; D_5__uncultured bacterium; D_6__uncultured bacterium	0.00969947	0.000296865	0.00872161	0	0.000681002
Otu2813	D_0__Bacteria; D_1__Proteobacteria; D_2__Gammaproteobacteria; D_3__Gammaproteobacteria Incertae Sedis; D_4__Unknown Family; D_5__uncultured	0.00969947	0.000296865	0.00872161	0	0.000681002
Otu1687	D_0__Bacteria; D_1__Chloroflexi; D_2__Anaerolineae; D_3__Anaerolineales; D_4__Anaerolineaceae; D_5__uncultured	0.00969067	0	0.00969067	0	0
Otu2873	Unassigned	0.00969067	0	0.00969067	0	0
Otu2941	D_0__Bacteria; D_1__Chloroflexi; D_2__Anaerolineae; D_3__Anaerolineales; D_4__Anaerolineaceae; D_5__uncultured; D_6__uncultured organism	0.00969067	0	0.00969067	0	0
Otu2676	D_0__Bacteria; D_1__Bacteroidetes; D_2__Flavobacteriia; D_3__Flavobacteriales; D_4__Cryomorphaceae; D_5__NS10 marine group	0.009682	0.000296865	0.00904463	0	0.000340501
Otu1819	Unassigned	0.00965664	0.0077185	0.00193813	0	0
Otu2339	D_0__Bacteria; D_1__Acidobacteria; D_2__Holophagae; D_3__Subgroup 10; D_4__TK85; D_5__uncultured bacterium; D_6__uncultured bacterium	0.00965366	0	0.000323022	0.00864963	0.000681002
Otu3630	D_0__Bacteria; D_1__Proteobacteria; D_2__Deltaproteobacteria; D_3__SAR324 clade(Marine group B); D_4__uncultured bacterium; D_5__uncultured bacterium; D_6__uncultured bacterium	0.00964917	0.00237492	0.00355325	0.00235899	0.001362
Otu2020	D_0__Bacteria; D_1__Planctomycetes; D_2__OM190; D_3__uncultured bacterium; D_4__uncultured bacterium; D_5__uncultured bacterium; D_6__uncultured bacterium	0.00963836	0.000593731	0.00904463	0	0
Otu1116	D_0__Bacteria; D_1__Proteobacteria; D_2__Gammaproteobacteria	0.00963255	0	0	0.00963255	0
Otu1768	Unassigned	0.00960867	0.0068279	0.00258418	0.000196583	0
Otu2559	D_0__Bacteria; D_1__Proteobacteria; D_2__Gammaproteobacteria; D_3__Cellvibrionales; D_4__Cellvibrionaceae; D_5__Simiduia; Ambiguous_taxa	0.00960398	0.00504671	0.00387627	0	0.000681002
Otu4906	D_0__Bacteria; D_1__Proteobacteria; D_2__Deltaproteobacteria; D_3__NB1-j; D_4__uncultured bacterium; D_5__uncultured bacterium; D_6__uncultured bacterium	0.00958605	0.00118746	0.00839858	0	0
Otu2701	D_0__Bacteria; D_1__Bacteroidetes; D_2__Bacteroidia; D_3__Bacteroidales; D_4__Rikenellaceae; D_5__Alistipes; D_6__uncultured bacterium	0.00958287	0.00504671	0.00355325	0.000982913	0
Otu2190	D_0__Bacteria; D_1__Proteobacteria; D_2__Gammaproteobacteria; D_3__Xanthomonadales; D_4__uncultured; D_5__uncultured bacterium; D_6__uncultured bacterium	0.00957338	0.000890596	0.00775254	0.000589748	0.000340501
Otu3605	D_0__Bacteria; D_1__Acidobacteria; D_2__Subgroup 22	0.00957303	0.000296865	0.00839858	0.000196583	0.000681002
Otu3442	D_0__Bacteria; D_1__Proteobacteria; D_2__Alphaproteobacteria; D_3__Rhodobacterales; D_4__Rhodobacteraceae; D_5__Pannonibacter; Ambiguous_taxa	0.00955101	0.000296865	0.00355325	0.0057009	0
Otu3596	D_0__Bacteria; D_1__Proteobacteria; D_2__Alphaproteobacteria; D_3__Rhodobacterales; D_4__Rhodobacteraceae	0.00954961	0.00178119	0	0.0033419	0.00442651
Otu1487	D_0__Bacteria; D_1__Proteobacteria; D_2__Alphaproteobacteria; D_3__Rickettsiales; D_4__Anaplasmataceae; D_5__Neorickettsia	0.00952722	0	0	0.00884622	0.000681002
Otu2528	D_0__Bacteria; D_1__Proteobacteria; D_2__Alphaproteobacteria; D_3__Rhodospirillales; D_4__Rhodospirillaceae; D_5__uncultured; D_6__uncultured bacterium	0.00951897	0.00178119	0.00419929	0.00353849	0
Otu3888	D_0__Bacteria; D_1__Proteobacteria; D_2__Gammaproteobacteria; D_3__E01-9C-26 marine group	0.00950803	0.00593731	0.00323022	0	0.000340501
Otu3043	D_0__Bacteria; D_1__Proteobacteria; D_2__Deltaproteobacteria; D_3__Bdellovibrionales; D_4__Bacteriovoracaceae; D_5__uncultured	0.0094949	0.00445298	0.00484534	0.000196583	0
Otu1103	D_0__Bacteria; D_1__Proteobacteria; D_2__Gammaproteobacteria; D_3__Vibrionales; D_4__Vibrionaceae	0.00948358	0.000296865	0	0.00884622	0.000340501
Otu4845	D_0__Bacteria; D_1__Bacteroidetes; D_2__Flavobacteriia; D_3__Flavobacteriales; D_4__Flavobacteriaceae; D_5__NS4 marine group	0.00947291	0.000296865	0.000323022	0	0.00885302
Otu4731	Unassigned	0.00946034	0.00207806	0.000323022	0.000589748	0.00646952
Otu4117	D_0__Bacteria; D_1__Proteobacteria; D_2__Deltaproteobacteria; D_3__NB1-j	0.00942548	0.000296865	0.00775254	0.00137608	0
Otu3812	D_0__Bacteria; D_1__Bacteroidetes; D_2__Flavobacteriia; D_3__Flavobacteriales; D_4__Flavobacteriaceae	0.00941245	0.00474985	0.00387627	0.00078633	0
Otu4343	D_0__Bacteria; D_1__Firmicutes; D_2__Clostridia; D_3__Clostridiales; D_4__Defluviitaleaceae; D_5__Defluviitaleaceae UCG-011; D_6__uncultured bacterium	0.00938819	0.00326552	0.00258418	0.00353849	0
Otu2892	D_0__Bacteria; D_1__Proteobacteria; D_2__Gammaproteobacteria; D_3__Chromatiales; D_4__Granulosicoccaceae; D_5__Granulosicoccus; D_6__uncultured gamma proteobacterium	0.0093833	0	0	0.0090428	0.000340501
Otu3633	D_0__Bacteria; D_1__Bacteroidetes; D_2__Flavobacteriia; D_3__Flavobacteriales; D_4__NS9 marine group; D_5__uncultured bacterium; D_6__uncultured bacterium	0.00938231	0.00445298	0.00355325	0.00137608	0
Otu2517	D_0__Bacteria; D_1__Proteobacteria; D_2__Gammaproteobacteria; D_3__Oceanospirillales; D_4__Oceanospirillaceae; D_5__Profundimonas; Ambiguous_taxa	0.00937893	0.00296865	0.00161511	0.00275216	0.00204301
Otu2794	D_0__Bacteria; D_1__Bacteroidetes; D_2__Bacteroidia; D_3__Bacteroidales; D_4__Porphyromonadaceae; D_5__uncultured; D_6__uncultured bacterium	0.00937601	0.00148433	0.00161511	0.00491457	0.001362
Otu4086	D_0__Bacteria; D_1__Saccharibacteria; D_2__uncultured bacterium; D_3__uncultured bacterium; D_4__uncultured bacterium; D_5__uncultured bacterium; D_6__uncultured bacterium	0.00936981	0.000593731	0.000323022	0.00845305	0
Otu4175	D_0__Bacteria; D_1__Bacteroidetes; D_2__Cytophagia; D_3__Cytophagales; D_4__Flammeovirgaceae; D_5__uncultured; D_6__uncultured bacterium	0.00936765	0	0.00936765	0	0
Otu1921	D_0__Bacteria; D_1__Saccharibacteria; D_2__uncultured bacterium; D_3__uncultured bacterium; D_4__uncultured bacterium; D_5__uncultured bacterium; D_6__uncultured bacterium	0.0093516	0.000890596	0.00484534	0.00157266	0.00204301
Otu3542	D_0__Bacteria; D_1__Bacteroidetes; D_2__Bacteroidia; D_3__Bacteroidales; D_4__Rikenellaceae; D_5__Anaerocella; D_6__uncultured bacterium	0.00933494	0.00267179	0.00226116	0.00235899	0.00204301
Otu1189	D_0__Bacteria; D_1__Proteobacteria; D_2__Alphaproteobacteria; D_3__Rhodobacterales; D_4__Rhodobacteraceae	0.00933309	0.000296865	0.00226116	0.00609406	0.000681002
Otu2440	D_0__Bacteria; D_1__Proteobacteria; D_2__AEGEAN-245; Ambiguous_taxa; Ambiguous_taxa; Ambiguous_taxa; Ambiguous_taxa	0.00931316	0	0.000323022	0.00864963	0.000340501
Otu3364	D_0__Bacteria; D_1__Bacteroidetes; D_2__Flavobacteriia; D_3__Flavobacteriales; D_4__Flavobacteriaceae; D_5__Algitalea; D_6__uncultured bacterium	0.00929985	0.00474985	0.00258418	0.00196583	0
Otu4519	D_0__Bacteria; D_1__Bacteroidetes; D_2__Flavobacteriia; D_3__Flavobacteriales; D_4__Flavobacteriaceae; D_5__Maribacter; Ambiguous_taxa	0.009294	0.000593731	0.00742952	0.000589748	0.000681002
Otu1710	D_0__Bacteria; D_1__Nitrospinae; D_2__Nitrospinia; D_3__Nitrospinales; D_4__Nitrospinaceae; D_5__Nitrospina	0.00927749	0.00148433	0.000323022	0.00747014	0
Otu3531	D_0__Bacteria; D_1__Proteobacteria; D_2__Gammaproteobacteria; D_3__Xanthomonadales; D_4__Xanthomonadaceae; D_5__Thermomonas	0.00925908	0.000296865	0.000969067	0.00629064	0.0017025
Otu2742	D_0__Bacteria; D_1__Proteobacteria; D_2__Gammaproteobacteria; D_3__Cellvibrionales; D_4__Spongiibacteraceae	0.0092559	0.000296865	0.0029072	0.00196583	0.00408601
Otu1732	D_0__Bacteria; D_1__Saccharibacteria	0.00924195	0.000890596	0.000646045	0.00668381	0.0010215
Otu2081	D_0__Bacteria; D_1__Bacteroidetes; D_2__Flavobacteriia; D_3__Flavobacteriales; D_4__Flavobacteriaceae; D_5__Flavobacterium; D_6__uncultured bacterium	0.00922248	0.000593731	0.00129209	0.00393165	0.00340501
Otu1814	D_0__Bacteria; D_1__Proteobacteria; D_2__Gammaproteobacteria; D_3__Pseudomonadales; D_4__Pseudomonadaceae; D_5__Pseudomonas	0.00921686	0.000296865	0.000323022	0.00825647	0.000340501
Otu3154	D_0__Bacteria; D_1__Proteobacteria; D_2__Gammaproteobacteria; D_3__Thiotrichales; D_4__H2-104-2; D_5__uncultured bacterium; D_6__uncultured bacterium	0.00921117	0.00564044	0.00323022	0	0.000340501
Otu2943	D_0__Bacteria; D_1__Proteobacteria; D_2__Gammaproteobacteria; D_3__Thiotrichales; D_4__Thiotrichales Incertae Sedis; D_5__Caedibacter	0.00920283	0.00920283	0	0	0
Otu3009	D_0__Bacteria; D_1__Bacteroidetes; D_2__Flavobacteriia; D_3__Flavobacteriales; D_4__Cryomorphaceae; D_5__uncultured	0.00920148	0	0.00355325	0.00530773	0.000340501
Otu1577	Unassigned	0.00920029	0.000296865	0.00516836	0.00373507	0
Otu1753	D_0__Bacteria; D_1__Bacteroidetes; D_2__Flavobacteriia; D_3__Flavobacteriales; D_4__Cryomorphaceae; D_5__uncultured	0.00918014	0	0.00226116	0.00589748	0.0010215
Otu2459	D_0__Bacteria; D_1__Firmicutes; D_2__Bacilli; D_3__Lactobacillales; D_4__Streptococcaceae; D_5__Streptococcus; D_6__uncultured bacterium	0.00917188	0.00445298	0.00452231	0.000196583	0
Otu2594	D_0__Bacteria; D_1__Planctomycetes; D_2__OM190; Ambiguous_taxa; Ambiguous_taxa; Ambiguous_taxa; Ambiguous_taxa	0.009155	0.00356238	0.0029072	0.000982913	0.0017025
Otu1953	D_0__Bacteria; D_1__Proteobacteria; D_2__Deltaproteobacteria; D_3__NB1-j	0.00915406	0.00118746	0.00742952	0.000196583	0.000340501
Otu1908	D_0__Bacteria; D_1__Bacteroidetes; D_2__Flavobacteriia; D_3__Flavobacteriales; D_4__Flavobacteriaceae; D_5__Dokdonia	0.00915292	0.00118746	0.00193813	0.00432482	0.0017025
Otu2129	D_0__Bacteria; D_1__Proteobacteria; D_2__Deltaproteobacteria; D_3__Bdellovibrionales; D_4__Bacteriovoracaceae; D_5__Peredibacter	0.00915208	0.00207806	0.0029072	0.00314532	0.0010215
Otu3361	D_0__Bacteria; D_1__Actinobacteria; D_2__Acidimicrobiia; D_3__Acidimicrobiales; D_4__OM1 clade; Ambiguous_taxa; Ambiguous_taxa	0.00911043	0.00148433	0.00742952	0.000196583	0
Otu3181	D_0__Bacteria; D_1__Bacteroidetes; D_2__Flavobacteriia; D_3__Flavobacteriales; D_4__Cryomorphaceae; D_5__Fluviicola; D_6__uncultured bacterium	0.00909859	0.00296865	0.00387627	0.00157266	0.000681002
Otu1502	D_0__Bacteria; D_1__Proteobacteria; D_2__Alphaproteobacteria; D_3__Rickettsiales; D_4__SM2D12	0.00909685	0.00118746	0.00226116	0.00530773	0.000340501
Otu1985	D_0__Bacteria; D_1__Proteobacteria; D_2__Gammaproteobacteria; D_3__Cellvibrionales; D_4__Cellvibrionaceae; D_5__uncultured	0.00909015	0.000593731	0.00613743	0.00235899	0
Otu4244	D_0__Bacteria; D_1__Proteobacteria; D_2__Deltaproteobacteria; D_3__Myxococcales; D_4__BIrii41; D_5__uncultured bacterium; D_6__uncultured bacterium	0.00906211	0	0.00872161	0	0.000340501
Otu2293	D_0__Bacteria; D_1__Proteobacteria; D_2__Deltaproteobacteria	0.00905909	0.000296865	0.00129209	0.00747014	0
Otu3125	D_0__Bacteria; D_1__Bacteroidetes; D_2__Bacteroidia; D_3__Bacteroidales; D_4__Porphyromonadaceae; D_5__Macellibacteroides; D_6__uncultured bacterium	0.00905377	0.00356238	0.00549138	0	0
Otu2641	D_0__Bacteria; D_1__Chloroflexi; D_2__Anaerolineae; D_3__Anaerolineales; D_4__Anaerolineaceae; D_5__uncultured; D_6__uncultured bacterium	0.00904463	0	0.00904463	0	0
Otu3174	D_0__Bacteria; D_1__Proteobacteria; D_2__Deltaproteobacteria; D_3__NB1-j; D_4__uncultured bacterium; D_5__uncultured bacterium; D_6__uncultured bacterium	0.00904463	0	0.00904463	0	0
Otu3071	Unassigned	0.0090428	0	0	0.0090428	0
Otu4487	D_0__Bacteria; D_1__Proteobacteria; D_2__Deltaproteobacteria; D_3__Bdellovibrionales; D_4__Bdellovibrionaceae; D_5__OM27 clade; D_6__uncultured bacterium	0.0090178	0.00148433	0.000969067	0.0045214	0.00204301
Otu3013	D_0__Bacteria; D_1__Proteobacteria; D_2__Gammaproteobacteria	0.00900979	0.000593731	0.00807556	0	0.000340501
Otu3252	D_0__Bacteria; D_1__Proteobacteria; D_2__Epsilonproteobacteria; D_3__Campylobacterales; D_4__Helicobacteraceae; D_5__Sulfurimonas; D_6__uncultured bacterium	0.00900662	0.00445298	0.00323022	0.000982913	0.000340501
Otu3372	D_0__Bacteria; D_1__Bacteroidetes; D_2__Flavobacteriia; D_3__Flavobacteriales; D_4__Flavobacteriaceae; D_5__Ulvibacter	0.00900257	0.000296865	0.000323022	0.00157266	0.00681002
Otu4756	D_0__Bacteria; D_1__Fibrobacteres; D_2__Chitinivibrionia; D_3__Chitinivibrionales; D_4__Chitinivibrionaceae; D_5__possible genus 03; D_6__uncultured bacterium	0.00899338	0.00356238	0.00226116	0.00078633	0.00238351
Otu2532	D_0__Bacteria; D_1__Proteobacteria; D_2__Deltaproteobacteria; D_3__Myxococcales; D_4__Nannocystaceae; D_5__uncultured	0.00899014	0	0	0.00864963	0.000340501
Otu2377	D_0__Bacteria; D_1__Proteobacteria; D_2__Gammaproteobacteria	0.00898719	0	0.0029072	0.00471798	0.001362
Otu4740	D_0__Bacteria; D_1__Bacteroidetes; D_2__Flavobacteriia; D_3__Flavobacteriales; D_4__Flavobacteriaceae	0.00898509	0.000296865	0	0.00766672	0.0010215
Otu1914	D_0__Bacteria; D_1__Proteobacteria; D_2__Epsilonproteobacteria; D_3__Campylobacterales; D_4__Helicobacteraceae; D_5__Sulfurimonas; D_6__uncultured bacterium	0.00893284	0.00445298	0.0029072	0.00157266	0
Otu1579	D_0__Bacteria; D_1__Actinobacteria; D_2__Actinobacteria; D_3__Pseudonocardiales; D_4__Pseudonocardiaceae; D_5__Prauserella; Ambiguous_taxa	0.00889782	0.000890596	0	0.00766672	0.000340501
Otu1782	D_0__Bacteria; D_1__Proteobacteria; D_2__Gammaproteobacteria; D_3__Aeromonadales; D_4__Aeromonadaceae; D_5__Aeromonas; D_6__uncultured bacterium	0.00888432	0.00148433	0.000969067	0.000982913	0.00544801
Otu2009	D_0__Bacteria; D_1__Proteobacteria; D_2__Gammaproteobacteria; D_3__KI89A clade	0.00887528	0	0.00516836	0.000982913	0.00272401
Otu3100	D_0__Bacteria; D_1__Proteobacteria; D_2__Gammaproteobacteria; D_3__Thiotrichales; D_4__Thiotrichales Incertae Sedis; D_5__Candidatus Endoecteinascidia; D_6__uncultured bacterium	0.00887501	0.00415612	0.00452231	0.000196583	0
Otu1492	D_0__Bacteria; D_1__Bacteroidetes; D_2__Flavobacteriia; D_3__Flavobacteriales; D_4__Cryomorphaceae; D_5__Crocinitomix	0.00884281	0	0.000969067	0.00412823	0.00374551
Otu2497	D_0__Bacteria; D_1__Actinobacteria; D_2__Acidimicrobiia; D_3__Acidimicrobiales; D_4__Sva0996 marine group; D_5__uncultured bacterium; D_6__uncultured bacterium	0.00883584	0.00356238	0.00419929	0.000393165	0.000681002
Otu2422	D_0__Bacteria; D_1__Firmicutes; D_2__Clostridia; D_3__Clostridiales; D_4__Ruminococcaceae; D_5__uncultured; D_6__uncultured bacterium	0.00877971	0	0.000969067	0.00747014	0.000340501
Otu1580	D_0__Bacteria; D_1__Proteobacteria; D_2__Alphaproteobacteria; D_3__Alphaproteobacteria Incertae Sedis; D_4__Unknown Family; D_5__uncultured	0.00877607	0	0.000323022	0.00845305	0
Otu1704	D_0__Bacteria; D_1__Chlorobi; D_2__Chlorobia; D_3__Chlorobiales; D_4__OPB56	0.00875237	0.000593731	0.00226116	0.00589748	0
Otu3885	D_0__Bacteria; D_1__Proteobacteria; D_2__Epsilonproteobacteria; D_3__Campylobacterales; D_4__Campylobacteraceae; D_5__Arcobacter	0.00872302	0.00356238	0.00193813	0.0011795	0.00204301
Otu1372	D_0__Bacteria; D_1__Proteobacteria; D_2__Alphaproteobacteria; D_3__Rickettsiales;	0.00869584	0.000593731	0.000646045	0.00609406	0.001362
Otu3409	D_0__Bacteria; D_1__Proteobacteria; D_2__SPOTSOCT00m83	0.00869545	0.000296865	0.00839858	0	0
Otu4282	D_0__Bacteria; D_1__Proteobacteria; D_2__Gammaproteobacteria; D_3__Cellvibrionales; D_4__Cellvibrionaceae; D_5__Simiduia; D_6__uncultured bacterium	0.00869545	0.000296865	0.00839858	0	0
Otu3323	D_0__Bacteria; D_1__Proteobacteria; D_2__Gammaproteobacteria; D_3__Oceanospirillales; D_4__Alcanivoracaceae; D_5__Kangiella; D_6__uncultured bacterium	0.00868459	0	0	0.00255557	0.00612902
Otu1696	D_0__Bacteria; D_1__Proteobacteria; D_2__Gammaproteobacteria; D_3__Gammaproteobacteria Incertae Sedis; D_4__Unknown Family; D_5__uncultured; D_6__uncultured gamma proteobacterium	0.00867529	0	0.00549138	0.00216241	0.0010215
Otu2812	D_0__Bacteria; D_1__Proteobacteria; D_2__Betaproteobacteria; D_3__Neisseriales; D_4__Neisseriaceae	0.0086701	0.00504671	0.00323022	0.000393165	0
Otu1165	D_0__Bacteria; D_1__Proteobacteria; D_2__Alphaproteobacteria; D_3__Rhodospirillales; D_4__Rhodospirillaceae	0.00866158	0.00178119	0	0.00688039	0
Otu4320	D_0__Bacteria; D_1__Bacteroidetes; D_2__Flavobacteriia; D_3__Flavobacteriales; D_4__Flavobacteriaceae; D_5__NS4 marine group	0.00866098	0.00267179	0.00258418	0	0.00340501
Otu1960	D_0__Bacteria; D_1__Proteobacteria; D_2__Gammaproteobacteria; D_3__Sva0071; D_4__uncultured bacterium; D_5__uncultured bacterium; D_6__uncultured bacterium	0.00865663	0.000296865	0.00742952	0.000589748	0.000340501
Otu3645	D_0__Bacteria; D_1__Proteobacteria; D_2__Gammaproteobacteria; D_3__Alteromonadales	0.00865079	0.00118746	0.00129209	0.00412823	0.00204301
Otu1530	D_0__Bacteria; D_1__Proteobacteria; D_2__Gammaproteobacteria; D_3__Pseudomonadales; D_4__Pseudomonadaceae; D_5__Pseudomonas	0.00864963	0	0	0.00864963	0
Otu1691	D_0__Bacteria; D_1__Proteobacteria; D_2__Gammaproteobacteria	0.00862968	0.00118746	0.000969067	0.00511115	0.001362
Otu3343	D_0__Bacteria; D_1__Proteobacteria; D_2__Gammaproteobacteria	0.00861477	0.00207806	0.00193813	0.00255557	0.00204301
Otu2179	D_0__Bacteria; D_1__Proteobacteria; D_2__Deltaproteobacteria; D_3__Myxococcales; D_4__Haliangiaceae; D_5__Haliangium; D_6__uncultured bacterium	0.00859517	0	0.00839858	0.000196583	0
Otu1888	D_0__Bacteria; D_1__Proteobacteria; D_2__Gammaproteobacteria; D_3__Oceanospirillales	0.00859356	0	0.000969067	0.00353849	0.00408601
Otu2619	D_0__Bacteria; D_1__Proteobacteria; D_2__Gammaproteobacteria; D_3__Alteromonadales; D_4__Moritellaceae; D_5__Moritella	0.0085743	0.00118746	0.00484534	0.0011795	0.001362
Otu3454	Unassigned	0.00853232	0.00237492	0.000969067	0.00314532	0.00204301
Otu1290	D_0__Bacteria; D_1__Firmicutes; D_2__Clostridia; D_3__Halanaerobiales; D_4__ODP1230B8.23	0.00853046	0	0.000969067	0.00688039	0.000681002
Otu3214	D_0__Bacteria; D_1__Proteobacteria; D_2__Gammaproteobacteria; D_3__Cellvibrionales; D_4__Spongiibacteraceae; D_5__BD1-7 clade; D_6__uncultured marine bacterium	0.0085266	0	0	0.00137608	0.00715052
Otu1784	D_0__Bacteria; D_1__Nitrospinae; D_2__Nitrospinia; D_3__Nitrospinales; D_4__Nitrospinaceae; D_5__Nitrospina; D_6__uncultured bacterium	0.00850919	0.00356238	0.00323022	0.00137608	0.000340501
Otu4564	D_0__Bacteria; D_1__Proteobacteria; D_2__Deltaproteobacteria; D_3__Bradymonadales; D_4__uncultured bacterium; D_5__uncultured bacterium; D_6__uncultured bacterium	0.00849868	0	0.000323022	0.00511115	0.00306451
Otu2640	D_0__Bacteria; D_1__Verrucomicrobia; D_2__R76-B128; D_3__uncultured bacterium; D_4__uncultured bacterium; D_5__uncultured bacterium; D_6__uncultured bacterium	0.00846917	0.00653104	0.00193813	0	0
Otu3157	D_0__Bacteria; D_1__Proteobacteria; D_2__Alphaproteobacteria; D_3__Rhodospirillales; D_4__Rhodospirillaceae; D_5__Pelagibius	0.00846005	0.000296865	0.00742952	0.000393165	0.000340501
Otu2925	D_0__Bacteria; D_1__Proteobacteria; D_2__Gammaproteobacteria; D_3__Cellvibrionales; D_4__Halieaceae; D_5__Luminiphilus; D_6__uncultured marine bacterium	0.00845305	0	0	0.00845305	0
Otu1792	D_0__Bacteria; D_1__Saccharibacteria; D_2__uncultured bacterium; D_3__uncultured bacterium; D_4__uncultured bacterium; D_5__uncultured bacterium; D_6__uncultured bacterium	0.00844801	0.000296865	0	0.00747014	0.000681002
Otu1827	D_0__Bacteria; D_1__Bacteroidetes; D_2__Bacteroidetes Incertae Sedis; D_3__Order II; D_4__Rhodothermaceae; D_5__uncultured; D_6__uncultured bacterium	0.00843389	0.000593731	0.00710649	0.000393165	0.000340501
Otu3614	D_0__Bacteria; D_1__Bacteroidetes; D_2__Flavobacteriia; D_3__Flavobacteriales; D_4__Flavobacteriaceae; D_5__uncultured; D_6__uncultured bacterium	0.00842675	0.00118746	0.00419929	0.00235899	0.000681002
Otu1899	D_0__Bacteria; D_1__Proteobacteria; D_2__Gammaproteobacteria; D_3__Legionellales; D_4__Legionellaceae; D_5__Legionella	0.008425	0.00207806	0.000646045	0.0057009	0
Otu4093	D_0__Bacteria; D_1__Proteobacteria; D_2__Gammaproteobacteria; D_3__Oceanospirillales; D_4__OM182 clade; D_5__uncultured bacterium; D_6__uncultured bacterium	0.00840238	0.000296865	0.000323022	0.00471798	0.00306451
Otu1912	D_0__Bacteria; D_1__Proteobacteria; D_2__Deltaproteobacteria; D_3__NB1-j	0.00839858	0	0.00839858	0	0
Otu3096	D_0__Bacteria; D_1__Proteobacteria; D_2__Gammaproteobacteria; D_3__Cellvibrionales; D_4__Halieaceae; D_5__Halioglobus	0.00839858	0	0.00839858	0	0
Otu2231	D_0__Bacteria; D_1__Proteobacteria; D_2__Gammaproteobacteria; D_3__Oceanospirillales; D_4__Oceanospirillaceae; D_5__Pseudohongiella; D_6__uncultured gamma proteobacterium	0.00839673	0.00148433	0.00226116	0.00294874	0.0017025
Otu4722	D_0__Bacteria; D_1__Proteobacteria; D_2__Alphaproteobacteria; D_3__Rhizobiales; D_4__PS1 clade; D_5__uncultured bacterium; D_6__uncultured bacterium	0.00838268	0	0	0.00157266	0.00681002
Otu2958	D_0__Bacteria; D_1__Bacteroidetes; D_2__Bacteroidia; D_3__Bacteroidales; D_4__uncultured; D_5__uncultured bacterium; D_6__uncultured bacterium	0.00838156	0.00385925	0.00452231	0	0
Otu4486	D_0__Bacteria; D_1__Proteobacteria; D_2__Alphaproteobacteria; D_3__Rhodospirillales; D_4__Rhodospirillaceae; D_5__uncultured	0.00838156	0.00385925	0.00452231	0	0
Otu2335	D_0__Bacteria; D_1__Parcubacteria; D_2__uncultured bacterium; D_3__uncultured bacterium; D_4__uncultured bacterium; D_5__uncultured bacterium; D_6__uncultured bacterium	0.00837243	0.000296865	0.00807556	0	0
Otu4448	D_0__Bacteria; D_1__TM6 (Dependentiae); D_2__uncultured bacterium; D_3__uncultured bacterium; D_4__uncultured bacterium; D_5__uncultured bacterium; D_6__uncultured bacterium	0.00837045	0.00118746	0.00355325	0.00294874	0.000681002
Otu1336	D_0__Bacteria; D_1__Proteobacteria; D_2__Alphaproteobacteria; D_3__Rhizobiales; D_4__OCS116 clade	0.00831277	0	0.000646045	0.00766672	0
Otu2706	D_0__Bacteria; D_1__Proteobacteria; D_2__Deltaproteobacteria; D_3__Myxococcales; D_4__BIrii41; D_5__uncultured bacterium; D_6__uncultured bacterium	0.00827239	0.00118746	0.00484534	0.000196583	0.00204301
Otu1370	D_0__Bacteria; D_1__Spirochaetae; D_2__Spirochaetes; D_3__Spirochaetales; D_4__Spirochaetaceae; D_5__Spirochaeta 2; Ambiguous_taxa	0.00826826	0.00534358	0.00258418	0	0.000340501
Otu1977	D_0__Bacteria; D_1__Firmicutes; D_2__Bacilli; D_3__Bacillales; D_4__Bacillaceae; D_5__Bacillus	0.00825647	0	0	0.00825647	0
Otu1742	D_0__Bacteria; D_1__Proteobacteria; D_2__Deltaproteobacteria; D_3__Myxococcales; D_4__BIrii41; D_5__uncultured bacterium; D_6__uncultured bacterium	0.00824599	0.000296865	0.00775254	0.000196583	0
Otu3027	D_0__Bacteria; D_1__Actinobacteria; D_2__Actinobacteria; D_3__Micrococcales; D_4__Micrococcaceae	0.0082066	0.000890596	0.00161511	0.0057009	0
Otu2343	D_0__Bacteria; D_1__Proteobacteria; D_2__Deltaproteobacteria; D_3__Bdellovibrionales; D_4__Bacteriovoracaceae; D_5__Peredibacter; D_6__uncultured bacterium	0.00819911	0.000890596	0	0.0011795	0.00612902
Otu1797	D_0__Bacteria; D_1__Proteobacteria; D_2__Alphaproteobacteria; D_3__Rhizobiales; D_4__Methylocystaceae	0.00818408	0.00118746	0.00193813	0.00471798	0.000340501
Otu3132	D_0__Bacteria; D_1__Proteobacteria; D_2__Alphaproteobacteria; D_3__Rhodobacterales; D_4__Rhodobacteraceae	0.00818408	0.00118746	0.00193813	0.00471798	0.000340501
Otu1108	D_0__Bacteria; D_1__Proteobacteria; D_2__Alphaproteobacteria; D_3__Rhizobiales; D_4__OCS116 clade	0.00816017	0.000296865	0	0.0078633	0
Otu1894	D_0__Bacteria; D_1__Proteobacteria; D_2__Alphaproteobacteria; D_3__Rickettsiales; D_5__Proteobacteria bacterium JGI 0000113-D06; D_6__Proteobacteria bacterium JGI 0000113-D06	0.00812322	0	0.000969067	0.00511115	0.00204301
Otu1672	D_0__Bacteria; D_1__Proteobacteria; D_2__Epsilonproteobacteria; D_3__Campylobacterales; D_4__Helicobacteraceae; D_5__Sulfurimonas; Ambiguous_taxa	0.00812072	0.00267179	0.00387627	0.00157266	0
Otu4377	D_0__Bacteria; D_1__Proteobacteria; D_2__Deltaproteobacteria; D_3__NB1-j; D_4__uncultured bacterium; D_5__uncultured bacterium; D_6__uncultured bacterium	0.00811955	0.000296865	0.00742952	0.000393165	0
Otu1799	Unassigned	0.0081171	0	0.00516836	0.00294874	0
Otu3880	D_0__Bacteria; D_1__Proteobacteria; D_2__Gammaproteobacteria	0.00809848	0	0	0.00707697	0.0010215
Otu2834	D_0__Bacteria; D_1__Proteobacteria; D_2__Gammaproteobacteria; D_3__Cellvibrionales; D_4__Spongiibacteraceae; D_5__BD1-7 clade; D_6__uncultured marine bacterium	0.00809484	0	0	0.00196583	0.00612902
Otu2567	D_0__Bacteria; D_1__Bacteroidetes; D_2__Bacteroidia; D_3__Bacteroidales; D_4__Porphyromonadaceae; D_5__Macellibacteroides; D_6__uncultured bacterium	0.00807602	0.00385925	0.00387627	0	0.000340501
Otu2713	D_0__Bacteria; D_1__Proteobacteria; D_2__Alphaproteobacteria	0.00807556	0	0.00807556	0	0
Otu2887	D_0__Bacteria; D_1__Proteobacteria; D_2__Alphaproteobacteria; D_3__Rhodobacterales; D_4__Rhodobacteraceae	0.00807556	0	0.00807556	0	0
Otu3161	D_0__Bacteria; D_1__Proteobacteria; D_2__Alphaproteobacteria; D_3__Alphaproteobacteria Incertae Sedis; D_4__Unknown Family; D_5__uncultured; D_6__uncultured bacterium	0.00807007	0.00148433	0.00129209	0.00393165	0.001362
Otu2210	D_0__Bacteria; D_1__Proteobacteria; D_2__Deltaproteobacteria; D_3__NB1-j; D_4__uncultured bacterium; D_5__uncultured bacterium; D_6__uncultured bacterium	0.00806688	0.000296865	0.00742952	0	0.000340501
Otu3032	D_0__Bacteria; D_1__Firmicutes; D_2__Clostridia; D_3__Clostridiales; D_4__Family XIII; D_5__Anaerovorax; Ambiguous_taxa	0.00805989	0	0	0.00805989	0
Otu2999	D_0__Bacteria; D_1__Proteobacteria; D_2__Deltaproteobacteria; D_3__Bdellovibrionales; D_4__Bacteriovoracaceae; D_5__Peredibacter	0.00805153	0.00237492	0.00161511	0.00235899	0.0017025
Otu1892	D_0__Bacteria; D_1__Cyanobacteria; D_2__Melainabacteria; D_3__Obscuribacterales; D_4__uncultured bacterium; D_5__uncultured bacterium; D_6__uncultured bacterium	0.00804191	0.000296865	0.00549138	0.00157266	0.000681002
Otu2375	D_0__Bacteria; D_1__Lentisphaerae; D_2__Lentisphaeria; D_3__Lentisphaerales; D_4__Lentisphaeraceae; D_5__Lentisphaera	0.00802817	0.00356238	0.0029072	0.000196583	0.001362
Otu2578	D_0__Bacteria; D_1__Proteobacteria; D_2__Gammaproteobacteria; D_3__Oceanospirillales; D_4__Alcanivoracaceae; D_5__Kangiella; D_6__uncultured bacterium	0.00802325	0.000593731	0.00742952	0	0
Otu1858	D_0__Bacteria; D_1__Proteobacteria; D_2__Gammaproteobacteria	0.00800722	0	0	0.00766672	0.000340501
Otu2547	D_0__Bacteria; D_1__Chloroflexi; D_2__JG37-AG-4; D_3__uncultured bacterium; D_4__uncultured bacterium; D_5__uncultured bacterium; D_6__uncultured bacterium	0.00799231	0.000890596	0.000969067	0.00511115	0.0010215
Otu1305	D_0__Bacteria; D_1__Proteobacteria; D_2__Deltaproteobacteria; D_3__Bdellovibrionales; D_4__Bdellovibrionaceae; D_5__Bdellovibrio; D_6__uncultured bacterium	0.00798974	0	0.000323022	0.00766672	0
Otu1709	D_0__Bacteria; D_1__Proteobacteria; D_2__Alphaproteobacteria; D_3__Rhizobiales; D_4__Rhodobiaceae; D_5__Rhodobium	0.00798974	0	0.000323022	0.00766672	0
Otu4771	D_0__Bacteria; D_1__Bacteroidetes; D_2__Flavobacteriia; D_3__Flavobacteriales; D_4__Flavobacteriaceae; D_5__Maritimimonas	0.00798525	0.00237492	0.00355325	0.00137608	0.000681002
Otu2840	D_0__Bacteria; D_1__Proteobacteria; D_2__Betaproteobacteria; D_3__Burkholderiales; D_4__Comamonadaceae	0.0079847	0.000296865	0.000323022	0.00668381	0.000681002
Otu4567	D_0__Bacteria; D_1__Proteobacteria; D_2__Alphaproteobacteria; D_3__Caulobacterales; D_4__Hyphomonadaceae; D_5__Robiginitomaculum; D_6__uncultured bacterium	0.00798164	0.000890596	0.000646045	0.00235899	0.00408601
Otu1604	D_0__Bacteria; D_1__Proteobacteria; D_2__Gammaproteobacteria; D_3__Gammaproteobacteria Incertae Sedis; D_4__Unknown Family; D_5__uncultured; D_6__uncultured bacterium	0.00794071	0	0.000969067	0.00629064	0.000681002
Otu2062	D_0__Bacteria; D_1__Proteobacteria; D_2__Deltaproteobacteria; D_3__Bradymonadales	0.00792603	0.000890596	0.0029072	0.00412823	0
Otu1743	D_0__Bacteria; D_1__Proteobacteria; D_2__SPOTSOCT00m83; D_3__uncultured bacterium; D_4__uncultured bacterium; D_5__uncultured bacterium; D_6__uncultured bacterium	0.00792296	0.000296865	0.00742952	0.000196583	0
Otu2808	D_0__Bacteria; D_1__Proteobacteria; D_2__Alphaproteobacteria; D_3__Rickettsiales; D_4__LWSR-14; Ambiguous_taxa; Ambiguous_taxa	0.00790903	0.00207806	0.000969067	0.0045214	0.000340501
Otu4044	D_0__Bacteria; D_1__Proteobacteria; D_2__Gammaproteobacteria; D_3__Alteromonadales	0.00790292	0.00326552	0.000969067	0.00196583	0.0017025
Otu4068	D_0__Bacteria; D_1__Proteobacteria; D_2__Alphaproteobacteria; D_3__Rhodospirillales; D_4__Rhodospirillaceae; D_5__Pelagibius	0.00789681	0.000593731	0.00710649	0.000196583	0
Otu3220	D_0__Bacteria; D_1__Proteobacteria; D_2__Alphaproteobacteria; D_3__SAR11 clade; D_4__Chesapeake-Delaware Bay; D_5__uncultured bacterium; D_6__uncultured bacterium	0.0078946	0.00148433	0.00161511	0.00275216	0.00204301
Otu3381	D_0__Bacteria; D_1__Proteobacteria; D_2__Gammaproteobacteria; D_3__Aeromonadales; D_4__Aeromonadaceae; D_5__Oceanisphaera; Ambiguous_taxa	0.00786694	0	0.000646045	0.00688039	0.000340501
Otu3057	D_0__Bacteria; D_1__Firmicutes; D_2__Bacilli; D_3__Bacillales; D_4__Bacillaceae; D_5__uncultured; D_6__uncultured Firmicutes bacterium	0.0078633	0	0	0.0078633	0
Otu3067	D_0__Bacteria; D_1__Actinobacteria; D_2__Acidimicrobiia; D_3__Acidimicrobiales; D_4__Acidimicrobiales Incertae Sedis; D_5__Candidatus Microthrix; D_6__uncultured bacterium	0.00785037	0	0.00549138	0.00235899	0
Otu1638	D_0__Bacteria; D_1__Proteobacteria; D_2__Gammaproteobacteria; D_3__E01-9C-26 marine group	0.00784078	0.000296865	0.000323022	0.00688039	0.000340501
Otu2557	D_0__Bacteria; D_1__Proteobacteria; D_2__Gammaproteobacteria; D_3__Oceanospirillales; D_4__OM182 clade; D_5__uncultured bacterium; D_6__uncultured bacterium	0.00783616	0.00207806	0.00516836	0.000589748	0
Otu3627	D_0__Bacteria; D_1__Verrucomicrobia; D_2__Verrucomicrobiae; D_3__Verrucomicrobiales; D_4__Verrucomicrobiaceae; D_5__Roseibacillus; Ambiguous_taxa	0.00783596	0.000593731	0.00193813	0.000196583	0.00510751
Otu4467	D_0__Bacteria; D_1__Proteobacteria; D_2__Alphaproteobacteria; D_3__Rhodobacterales; D_4__Rhodobacteraceae; D_5__Pseudorhodobacter	0.00779126	0.00178119	0.00129209	0.00471798	0
Otu2265	D_0__Bacteria; D_1__Proteobacteria; D_2__Gammaproteobacteria; D_3__Alteromonadales; D_4__Pseudoalteromonadaceae; D_5__Pseudoalteromonas	0.00776842	0	0	0.0033419	0.00442651
Otu3629	D_0__Bacteria; D_1__Proteobacteria; D_2__Gammaproteobacteria; D_3__Oceanospirillales	0.00775807	0.00207806	0.00129209	0.000982913	0.00340501
Otu4305	D_0__Bacteria; D_1__Proteobacteria; D_2__Deltaproteobacteria; D_3__Myxococcales; D_4__P3OB-42; D_5__uncultured bacterium; D_6__uncultured bacterium	0.00775419	0.000890596	0.00387627	0.00196583	0.0010215
Otu1887	D_0__Bacteria; D_1__Proteobacteria; D_2__Deltaproteobacteria; D_3__NB1-j; D_4__uncultured bacterium; D_5__uncultured bacterium; D_6__uncultured bacterium	0.00775254	0	0.00775254	0	0
Otu2997	D_0__Bacteria; D_1__Planctomycetes; D_2__Pla3 lineage; D_3__uncultured planctomycete; D_4__uncultured planctomycete; D_5__uncultured planctomycete; D_6__uncultured planctomycete	0.00772638	0.000296865	0.00742952	0	0
Otu3540	D_0__Bacteria; D_1__Proteobacteria; D_2__Gammaproteobacteria; D_3__X35	0.00772302	0	0.000646045	0.00707697	0
Otu2285	D_0__Bacteria; D_1__Bacteroidetes; D_2__Flavobacteriia; D_3__Flavobacteriales; D_4__Cryomorphaceae; D_5__Crocinitomix; Ambiguous_taxa	0.00772042	0.000593731	0.0029072	0.00353849	0.000681002
Otu2432	D_0__Bacteria; D_1__Proteobacteria; D_2__Alphaproteobacteria; D_3__Alphaproteobacteria Incertae Sedis; D_4__uncultured	0.00768629	0.00237492	0.000646045	0.00432482	0.000340501
Otu3882	D_0__Bacteria; D_1__Firmicutes; D_2__Clostridia; D_3__Clostridiales; D_4__Peptococcaceae; D_5__Desulfonispora; D_6__Desulfonispora thiosulfatigenes	0.00766672	0	0	0.00766672	0
Otu2577	D_0__Bacteria; D_1__Saccharibacteria; D_2__uncultured bacterium; D_3__uncultured bacterium; D_4__uncultured bacterium; D_5__uncultured bacterium; D_6__uncultured bacterium	0.00766026	0.000593731	0.000646045	0.00471798	0.0017025
Otu2847	D_0__Bacteria; D_1__Firmicutes; D_2__Erysipelotrichia; D_3__Erysipelotrichales; D_4__Erysipelotrichaceae; D_5__Holdemanella; D_6__uncultured bacterium	0.00761343	0.00237492	0.00484534	0.000393165	0
Otu3203	D_0__Bacteria; D_1__Bacteroidetes; D_2__Flavobacteriia; D_3__Flavobacteriales; D_4__Flavobacteriaceae; D_5__Polaribacter 4	0.0075879	0.000296865	0.000323022	0.0011795	0.00578851
Otu4367	D_0__Bacteria; D_1__Spirochaetae; D_2__Spirochaetes; D_3__Spirochaetales; D_4__Spirochaetaceae; D_5__Spirochaeta 2; D_6__uncultured bacterium	0.00757858	0.00564044	0.00193813	0	0
Otu4788	D_0__Bacteria; D_1__Bacteroidetes; D_2__Flavobacteriia; D_3__Flavobacteriales; D_4__Schleiferiaceae; D_5__Schleiferia; D_6__uncultured bacterium	0.00757582	0.000593731	0	0.00255557	0.00442651
Otu2509	D_0__Bacteria; D_1__Proteobacteria; D_2__Gammaproteobacteria; D_3__Xanthomonadales; D_4__Xanthomonadaceae; D_5__Rhodanobacter	0.00757252	0	0.0029072	0.00432482	0.000340501
Otu3120	D_0__Bacteria; D_1__Firmicutes; D_2__Bacilli; D_3__Lactobacillales; D_4__Streptococcaceae; D_5__Streptococcus; D_6__uncultured bacterium	0.00756944	0.00207806	0.00549138	0	0
Otu2312	D_0__Bacteria; D_1__Saccharibacteria; D_2__uncultured bacterium; D_3__uncultured bacterium; D_4__uncultured bacterium; D_5__uncultured bacterium; D_6__uncultured bacterium	0.00755867	0	0.00387627	0.0033419	0.000340501
Otu1763	D_0__Bacteria; D_1__Actinobacteria; D_2__Actinobacteria; D_3__Propionibacteriales; D_4__Nocardioidaceae; D_5__Nocardioides	0.0075337	0	0.00193813	0.00491457	0.000681002
Otu2088	D_0__Bacteria; D_1__SBR1093; D_2__uncultured organism; D_3__uncultured organism; D_4__uncultured organism; D_5__uncultured organism; D_6__uncultured organism	0.00753098	0	0.0058144	0.00137608	0.000340501
Otu3506	D_0__Bacteria; D_1__Bacteroidetes; D_2__Flavobacteriia; D_3__Flavobacteriales; D_4__Cryomorphaceae; D_5__Fluviicola; D_6__uncultured bacterium	0.00752663	0.00415612	0.00258418	0.00078633	0
Otu2825	D_0__Bacteria; D_1__Bacteroidetes; D_2__Sphingobacteriia; D_3__Sphingobacteriales; D_4__uncultured	0.00752479	0.000296865	0.000323022	0.0045214	0.00238351
Otu1486	D_0__Bacteria; D_1__Proteobacteria; D_2__Gammaproteobacteria; D_3__Gammaproteobacteria Incertae Sedis; D_4__Unknown Family; D_5__uncultured; D_6__uncultured bacterium	0.00751236	0	0.000646045	0.00550431	0.001362
Otu4573	Unassigned	0.00750011	0.00653104	0.000969067	0	0
Otu2970	D_0__Bacteria; D_1__Proteobacteria; D_2__Gammaproteobacteria; D_3__KI89A clade; D_4__uncultured bacterium; D_5__uncultured bacterium; D_6__uncultured bacterium	0.00742952	0	0.00742952	0	0
Otu4552	D_0__Bacteria; D_1__Proteobacteria; D_2__Gammaproteobacteria	0.00742952	0	0.00742952	0	0
Otu3821	D_0__Bacteria; D_1__Proteobacteria; D_2__Alphaproteobacteria; D_3__Rhodobacterales; D_4__Rhodobacteraceae	0.00742331	0.00296865	0	0.00275216	0.0017025
Otu3483	D_0__Bacteria; D_1__Proteobacteria; D_2__Gammaproteobacteria; D_3__Cellvibrionales; D_4__Porticoccaceae; D_5__Porticoccus; D_6__uncultured bacterium	0.00740348	0.000890596	0.00549138	0	0.0010215
Otu2992	D_0__Bacteria; D_1__Actinobacteria; D_2__Actinobacteria; D_3__Micrococcales; D_4__Demequinaceae; D_5__Demequina; Ambiguous_taxa	0.00739835	0.000296865	0	0.00471798	0.00238351
Otu2360	D_0__Bacteria; D_1__Bacteroidetes; D_2__Flavobacteriia; D_3__Flavobacteriales; D_4__Cryomorphaceae; D_5__uncultured; D_6__uncultured bacterium	0.00739177	0.000296865	0.00226116	0.00176924	0.00306451
Otu2450	D_0__Bacteria; D_1__Firmicutes; D_2__Clostridia; D_3__Clostridiales; D_4__Peptococcaceae; D_5__Desulfonispora; D_6__Desulfonispora thiosulfatigenes	0.00737384	0.000296865	0	0.00707697	0
Otu1787	D_0__Bacteria; D_1__Proteobacteria; D_2__Deltaproteobacteria; D_3__Oligoflexales; D_4__Oligoflexaceae	0.00736481	0	0	0.00668381	0.000681002
Otu3799	D_0__Bacteria; D_1__Firmicutes; D_2__Clostridia; D_3__Clostridiales; D_4__Christensenellaceae; D_5__Christensenellaceae R-7 group; D_6__uncultured bacterium	0.0073615	0.00207806	0.00161511	0.00196583	0.0017025
Otu1861	D_0__Bacteria; D_1__Proteobacteria; D_2__Alphaproteobacteria; D_3__Sphingomonadales; D_4__Sphingomonadaceae	0.00735777	0	0.000323022	0.00294874	0.00408601
Otu4773	D_0__Bacteria; D_1__Proteobacteria; D_2__Alphaproteobacteria; D_3__Rhodobacterales; D_4__Rhodobacteraceae	0.0073562	0.00385925	0.0029072	0.000589748	0
Otu2315	D_0__Bacteria; D_1__Proteobacteria; D_2__Gammaproteobacteria; D_3__Gammaproteobacteria Incertae Sedis; D_4__Unknown Family; D_5__uncultured	0.00732535	0.00504671	0.00193813	0	0.000340501
Otu4131	D_0__Bacteria; D_1__Proteobacteria; D_2__Gammaproteobacteria; D_3__Oceanospirillales; D_4__Oceanospirillaceae; D_5__Pseudohongiella; D_6__uncultured gamma proteobacterium	0.00731704	0.000593731	0.00452231	0.0011795	0.0010215
Otu1794	D_0__Bacteria; D_1__Actinobacteria; D_2__Acidimicrobiia; D_3__Acidimicrobiales; D_4__OM1 clade	0.00729873	0.00148433	0.0058144	0	0
Otu4297	D_0__Bacteria; D_1__Proteobacteria; D_2__Gammaproteobacteria; D_3__Vibrionales; D_4__Vibrionaceae	0.00729873	0.00148433	0.0058144	0	0
Otu3527	D_0__Bacteria; D_1__Proteobacteria; D_2__Alphaproteobacteria	0.00728516	0.00118746	0.000646045	0.00511115	0.000340501
Otu2369	D_0__Bacteria; D_1__Proteobacteria; D_2__Deltaproteobacteria; D_3__Bdellovibrionales; D_4__Bdellovibrionaceae; D_5__OM27 clade; D_6__uncultured delta proteobacterium	0.00728171	0.00534358	0.00193813	0	0
Otu2223	D_0__Bacteria; D_1__Bacteroidetes; D_2__Bacteroidia; D_3__Bacteroidales; D_4__Prevotellaceae; D_5__Prevotella; Ambiguous_taxa	0.0072687	0.00445298	0.00193813	0.000196583	0.000681002
Otu4462	D_0__Bacteria; D_1__Bacteroidetes; D_2__Flavobacteriia; D_3__Flavobacteriales	0.00724701	0.00385925	0.00129209	0.000393165	0.0017025
Otu1803	D_0__Bacteria; D_1__Proteobacteria; D_2__Deltaproteobacteria; D_3__Myxococcales; D_4__P3OB-42; D_5__uncultured bacterium; D_6__uncultured bacterium	0.0072294	0.00593731	0.00129209	0	0
Otu2759	D_0__Bacteria; D_1__Firmicutes; D_2__Clostridia; D_3__Clostridiales; D_4__Lachnospiraceae; D_5__uncultured; D_6__uncultured bacterium	0.00722506	0.00474985	0.00193813	0.000196583	0.000340501
Otu2961	D_0__Bacteria; D_1__Proteobacteria; D_2__Gammaproteobacteria; D_3__Enterobacteriales; D_4__Enterobacteriaceae; D_5__Plesiomonas; D_6__uncultured bacterium	0.00722086	0.00148433	0.0029072	0.00078633	0.00204301
Otu1920	D_0__Bacteria; D_1__Proteobacteria; D_2__Alphaproteobacteria; D_3__Rickettsiales; D_4__Holosporaceae; D_5__uncultured	0.00720341	0	0.000323022	0.00688039	0
Otu2853	D_0__Bacteria; D_1__Acidobacteria; D_2__Holophagae; D_3__Subgroup 10; D_4__TK85; D_5__uncultured bacterium; D_6__uncultured bacterium	0.00715075	0	0.000323022	0.00648723	0.000340501
Otu3525	D_0__Bacteria; D_1__Proteobacteria; D_2__Gammaproteobacteria; D_3__Xanthomonadales; D_4__JTB255 marine benthic group	0.0071376	0.00118746	0.000646045	0.000196583	0.00510751
Otu1986	D_0__Bacteria; D_1__Planctomycetes; D_2__OM190; D_3__uncultured bacterium; D_4__uncultured bacterium; D_5__uncultured bacterium; D_6__uncultured bacterium	0.00713277	0.000296865	0.0058144	0	0.0010215
Otu2384	D_0__Bacteria; D_1__Proteobacteria; D_2__Deltaproteobacteria; D_3__Oligoflexales; D_4__Oligoflexaceae; D_5__uncultured bacterium; D_6__uncultured bacterium	0.00711755	0.000296865	0.000323022	0.00275216	0.00374551
Otu1619	D_0__Bacteria; D_1__Proteobacteria; D_2__Deltaproteobacteria; D_3__Bdellovibrionales; D_4__Bdellovibrionaceae; D_5__Bdellovibrio	0.00710649	0	0.00710649	0	0
Otu2968	D_0__Bacteria; D_1__Planctomycetes; D_2__Pla3 lineage; D_3__uncultured planctomycete; D_4__uncultured planctomycete; D_5__uncultured planctomycete; D_6__uncultured planctomycete	0.00710649	0	0.00710649	0	0
Otu3387	D_0__Bacteria; D_1__Proteobacteria; D_2__Deltaproteobacteria; D_3__NB1-j; D_4__uncultured bacterium; D_5__uncultured bacterium; D_6__uncultured bacterium	0.00710649	0	0.00710649	0	0
Otu4611	D_0__Bacteria; D_1__Acidobacteria; D_2__Subgroup 22; D_3__uncultured bacterium; D_4__uncultured bacterium; D_5__uncultured bacterium; D_6__uncultured bacterium	0.00710649	0	0.00710649	0	0
Otu3085	D_0__Bacteria; D_1__Bacteroidetes; D_2__Flavobacteriia; D_3__Flavobacteriales; D_4__Cryomorphaceae; D_5__uncultured	0.00709395	0.000296865	0.00484534	0.000589748	0.001362
Otu3358	D_0__Bacteria; D_1__Proteobacteria; D_2__Gammaproteobacteria; D_3__Gammaproteobacteria Incertae Sedis; D_4__Unknown Family; D_5__uncultured; D_6__uncultured bacterium	0.00709102	0.00148433	0.0029072	0.00235899	0.000340501
Otu3309	D_0__Bacteria; D_1__Proteobacteria; D_2__Gammaproteobacteria; D_3__Cellvibrionales; D_4__Halieaceae; D_5__OM60(NOR5) clade; D_6__uncultured gamma proteobacterium	0.00708764	0	0.000969067	0.00373507	0.00238351
Otu2894	D_0__Bacteria; D_1__Planctomycetes; D_2__OM190	0.00708034	0.000296865	0.00678347	0	0
Otu1392	D_0__Bacteria; D_1__Proteobacteria; D_2__Gammaproteobacteria; D_3__Pseudomonadales; D_4__Pseudomonadaceae; D_5__Pseudomonas; Ambiguous_taxa	0.00707697	0	0	0.00707697	0
Otu4909	D_0__Bacteria; D_1__Proteobacteria; D_2__Betaproteobacteria; D_3__Neisseriales; D_4__Neisseriaceae; D_5__Deefgea; Ambiguous_taxa	0.00707697	0	0	0.00707697	0
Otu2273	D_0__Bacteria; D_1__Bacteroidetes; D_2__Flavobacteriia; D_3__Flavobacteriales; D_4__Flavobacteriaceae; D_5__Maritimimonas	0.00705535	0.00296865	0.0029072	0.0011795	0
Otu1791	D_0__Bacteria; D_1__Cyanobacteria; D_2__ML635J-21	0.00704834	0.00148433	0.000323022	0.00353849	0.0017025
Otu3446	D_0__Bacteria; D_1__Actinobacteria; D_2__Actinobacteria; D_3__Corynebacteriales; D_4__Corynebacteriaceae; D_5__Corynebacterium 1	0.00704741	0.000296865	0.000646045	0.00235899	0.00374551
Otu2001	D_0__Bacteria; D_1__Proteobacteria; D_2__Betaproteobacteria; D_3__Burkholderiales; D_4__Burkholderiaceae; D_5__Burkholderia-Paraburkholderia	0.0070175	0	0.00129209	0.0033419	0.00238351
Otu3480	D_0__Bacteria; D_1__Proteobacteria; D_2__Gammaproteobacteria; D_3__Xanthomonadales; D_4__Xanthomonadaceae; D_5__Stenotrophomonas; Ambiguous_taxa	0.00700223	0.00296865	0.000969067	0	0.00306451
Otu2271	D_0__Bacteria; D_1__Actinobacteria; D_2__Actinobacteria; D_3__Micrococcales; D_4__Demequinaceae; D_5__Demequina; Ambiguous_taxa	0.00699989	0.00207806	0.00129209	0.00294874	0.000681002
Otu2631	D_0__Bacteria; D_1__Proteobacteria; D_2__Alphaproteobacteria; D_3__Rhodospirillales; D_4__Rhodospirillaceae	0.00699556	0.000890596	0.00193813	0.00314532	0.0010215
Otu2922	D_0__Bacteria; D_1__Planctomycetes; D_2__vadinHA49; D_3__uncultured bacterium; D_4__uncultured bacterium; D_5__uncultured bacterium; D_6__uncultured bacterium	0.00698005	0	0.00678347	0.000196583	0
Otu1998	D_0__Bacteria; D_1__Proteobacteria	0.00695757	0	0	0.00491457	0.00204301
Otu3441	D_0__Bacteria; D_1__Proteobacteria; D_2__Gammaproteobacteria	0.00695072	0.00415612	0.00161511	0.0011795	0
Otu2132	D_0__Bacteria; D_1__Lentisphaerae; D_2__Lentisphaeria; D_3__Lentisphaerales; D_4__Lentisphaeraceae; D_5__Lentisphaera; D_6__uncultured bacterium	0.00694955	0.00178119	0.00516836	0	0
Otu2521	D_0__Bacteria; D_1__Bacteroidetes; D_2__Flavobacteriia; D_3__Flavobacteriales; D_4__Flavobacteriaceae	0.00694955	0.00178119	0.00516836	0	0
Otu1874	D_0__Bacteria; D_1__Proteobacteria; D_2__Alphaproteobacteria; D_3__Rhodobacterales; D_4__Rhodobacteraceae; D_5__uncultured; D_6__uncultured bacterium	0.00694159	0.000593731	0.00516836	0.0011795	0
Otu3677	D_0__Bacteria; D_1__Acidobacteria; D_2__Holophagae; D_3__Subgroup 10; D_4__CA002; D_5__uncultured bacterium; D_6__uncultured bacterium	0.00693253	0.00564044	0.00129209	0	0
Otu4268	D_0__Bacteria; D_1__Proteobacteria; D_2__Gammaproteobacteria; D_3__Alteromonadales; D_4__Colwelliaceae; D_5__Colwellia; D_6__uncultured bacterium	0.00692801	0.000296865	0	0.00629064	0.000340501
Otu2449	D_0__Bacteria; D_1__Proteobacteria; D_2__Alphaproteobacteria; D_3__Rickettsiales; D_5__marine metagenome; D_6__marine metagenome	0.00691898	0	0	0.00589748	0.0010215
Otu2518	D_0__Bacteria; D_1__Proteobacteria; D_2__Alphaproteobacteria; D_3__Rhodobacterales; D_4__Rhodobacteraceae; D_5__uncultured	0.00691451	0.000890596	0.000323022	0.0057009	0
Otu4032	D_0__Bacteria; D_1__Cyanobacteria; D_2__Cyanobacteria; D_3__SubsectionI; D_4__FamilyI; D_5__Prochlorococcus; D_6__uncultured bacterium	0.00690638	0.00593731	0.000969067	0	0
Otu4345	D_0__Bacteria; D_1__Proteobacteria; D_2__Gammaproteobacteria; D_3__Cellvibrionales; D_4__Cellvibrionaceae; D_5__uncultured	0.00690465	0.00148433	0.00129209	0.00412823	0
Otu2056	D_0__Bacteria; D_1__Bacteroidetes; D_2__Flavobacteriia; D_3__Flavobacteriales; D_4__Schleiferiaceae; D_5__Schleiferia	0.00690372	0.000296865	0.00161511	0.00294874	0.00204301
Otu1647	D_0__Bacteria; D_1__Firmicutes; D_2__Clostridia; D_3__Clostridiales; D_4__Family XIII; D_5__Mogibacterium; Ambiguous_taxa	0.00688039	0	0	0.00688039	0
Otu1665	D_0__Bacteria; D_1__Saccharibacteria; D_2__uncultured bacterium; D_3__uncultured bacterium; D_4__uncultured bacterium; D_5__uncultured bacterium; D_6__uncultured bacterium	0.00688039	0	0	0.00688039	0
Otu2940	D_0__Bacteria; D_1__Verrucomicrobia; D_2__R76-B128; D_3__uncultured Verrucomicrobia bacterium; D_4__uncultured Verrucomicrobia bacterium; D_5__uncultured Verrucomicrobia bacterium; D_6__uncultured Verrucomicrobia bacterium	0.00686721	0.00534358	0.000646045	0.000196583	0.000681002
Otu4516	D_0__Bacteria; D_1__Bacteroidetes; D_2__Flavobacteriia; D_3__Flavobacteriales; D_4__Flavobacteriaceae; D_5__Polaribacter 1	0.00686268	0	0	0.000393165	0.00646952
Otu1300	D_0__Bacteria; D_1__Proteobacteria; D_2__Betaproteobacteria; D_3__Burkholderiales; D_4__Oxalobacteraceae	0.00685787	0.000296865	0.000323022	0.00589748	0.000340501
Otu1558	D_0__Bacteria; D_1__Proteobacteria; D_2__Deltaproteobacteria; D_3__Bdellovibrionales; D_4__Bdellovibrionaceae; D_5__OM27 clade; Ambiguous_taxa	0.00685247	0	0.000969067	0.0045214	0.001362
Otu4182	D_0__Bacteria; D_1__Proteobacteria; D_2__Gammaproteobacteria; D_3__Oceanospirillales; D_4__Oceanospirillaceae; D_5__Reinekea	0.00684492	0.00296865	0.00387627	0	0
Otu4216	D_0__Bacteria; D_1__Proteobacteria; D_2__Gammaproteobacteria; D_3__Xanthomonadales; D_4__JTB255 marine benthic group; D_5__uncultured bacterium; D_6__uncultured bacterium	0.00683262	0.000593731	0.00452231	0.00137608	0.000340501
Otu4402	D_0__Bacteria; D_1__Bacteroidetes; D_2__Flavobacteriia; D_3__Flavobacteriales; D_4__Flavobacteriaceae; D_5__uncultured; D_6__uncultured bacterium	0.00682746	0.000296865	0.00613743	0.000393165	0
Otu4041	D_0__Bacteria; D_1__Bacteroidetes; D_2__Flavobacteriia; D_3__Flavobacteriales; D_4__Cryomorphaceae; D_5__uncultured	0.0068073	0	0.00323022	0.00255557	0.0010215
Otu2535	D_0__Bacteria; D_1__Gracilibacteria; D_2__uncultured bacterium; D_3__uncultured bacterium; D_4__uncultured bacterium; D_5__uncultured bacterium; D_6__uncultured bacterium	0.00680612	0.000296865	0.00484534	0.000982913	0.000681002
Otu3514	D_0__Bacteria; D_1__Firmicutes; D_2__Clostridia; D_3__Clostridiales; D_4__Family XII; D_5__Fusibacter; D_6__uncultured bacterium	0.00679261	0.00356238	0.00323022	0	0
Otu1903	D_0__Bacteria; D_1__Proteobacteria; D_2__Gammaproteobacteria; D_3__Cellvibrionales; D_4__Cellvibrionaceae; D_5__Candidatus Endobugula	0.00678347	0	0.00678347	0	0
Otu1994	D_0__Bacteria; D_1__Nitrospinae; D_2__Nitrospinia; D_3__Nitrospinales; D_4__Nitrospinaceae; D_5__uncultured; Ambiguous_taxa	0.00678347	0	0.00678347	0	0
Otu2165	D_0__Bacteria; D_1__Chloroflexi; D_2__Caldilineae; D_3__Caldilineales; D_4__Caldilineaceae; D_5__uncultured; D_6__uncultured bacterium	0.00678347	0	0.00678347	0	0
Otu2408	D_0__Bacteria; D_1__Planctomycetes; D_2__OM190; D_3__uncultured bacterium; D_4__uncultured bacterium; D_5__uncultured bacterium; D_6__uncultured bacterium	0.00678347	0	0.00678347	0	0
Otu4004	D_0__Bacteria; D_1__Bacteroidetes; D_2__Sphingobacteriia; D_3__Sphingobacteriales; D_4__uncultured; D_5__uncultured bacterium; D_6__uncultured bacterium	0.00677143	0	0	0.000982913	0.00578851
Otu3561	D_0__Bacteria; D_1__Proteobacteria; D_2__Gammaproteobacteria; D_3__Gammaproteobacteria Incertae Sedis; D_4__Unknown Family; D_5__uncultured; D_6__uncultured bacterium	0.00675345	0.000296865	0.00484534	0.000589748	0.0010215
Otu2721	D_0__Bacteria; D_1__Bacteroidetes; D_2__Bacteroidia; D_3__Bacteroidales; D_4__Bacteroidaceae; D_5__Bacteroides; D_6__uncultured bacterium	0.00674464	0.00267179	0.00387627	0.000196583	0
Otu4096	Unassigned	0.00673643	0.00415612	0.000969067	0.000589748	0.0010215
Otu4256	D_0__Bacteria; D_1__Proteobacteria; D_2__Alphaproteobacteria; D_3__SAR11 clade; D_4__Surface 1; D_5__uncultured bacterium; D_6__uncultured bacterium	0.0067321	0.00296865	0.00161511	0.00078633	0.001362
Otu3191	D_0__Bacteria; D_1__Firmicutes; D_2__Bacilli; D_3__Lactobacillales; D_4__Streptococcaceae; D_5__Lactococcus	0.00671758	0.000296865	0.000969067	0.00511115	0.000340501
Otu3826	D_0__Bacteria; D_1__Proteobacteria; D_2__Gammaproteobacteria; D_3__Chromatiales; D_4__Ectothiorhodospiraceae	0.00670561	0	0.00387627	0.00078633	0.00204301
Otu1569	D_0__Bacteria; D_1__Bacteroidetes; D_2__Cytophagia; D_3__Cytophagales; D_4__Flammeovirgaceae; D_5__uncultured; D_6__uncultured Bacteroidetes bacterium	0.00668554	0.00178119	0.00161511	0.00294874	0.000340501
Otu3135	Unassigned	0.00668381	0	0	0.00668381	0
Otu2037	D_0__Bacteria; D_1__Firmicutes; D_2__Clostridia; D_3__Clostridiales; D_4__Clostridiaceae 1; D_5__Proteiniclasticum; Ambiguous_taxa	0.00668191	0.00178119	0.000969067	0.00393165	0
Otu4533	D_0__Bacteria; D_1__Proteobacteria; D_2__Alphaproteobacteria; D_3__SAR11 clade; D_4__LD12 freshwater group; D_5__uncultured bacterium; D_6__uncultured bacterium	0.00668085	0.00267179	0.000969067	0.00235899	0.000681002
Otu2221	D_0__Bacteria; D_1__Proteobacteria; D_2__Gammaproteobacteria; D_3__Alteromonadales; D_4__Pseudoalteromonadaceae; D_5__Algicola	0.00664835	0.000296865	0.0058144	0.000196583	0.000340501
Otu1804	D_0__Bacteria; D_1__Firmicutes; D_2__Bacilli; D_3__Bacillales; D_4__Listeriaceae; D_5__Brochothrix; Ambiguous_taxa	0.00664779	0.000890596	0.000646045	0.00511115	0
Otu2035	D_0__Bacteria; D_1__Bacteroidetes; D_2__Flavobacteriia; D_3__Flavobacteriales; D_4__Flavobacteriaceae; D_5__Flavobacterium; Ambiguous_taxa	0.00664381	0.000296865	0.000646045	0.0057009	0
Otu1959	D_0__Bacteria; D_1__Proteobacteria; D_2__Deltaproteobacteria; D_3__Bdellovibrionales; D_4__Bdellovibrionaceae; D_5__Bdellovibrio	0.00663841	0	0.00129209	0.00432482	0.0010215
Otu3373	D_0__Bacteria; D_1__Proteobacteria; D_2__Gammaproteobacteria; D_3__Oceanospirillales; D_4__Oceanospirillaceae; D_5__Balneatrix; D_6__uncultured marine bacterium	0.00663628	0.00178119	0.00129209	0.0011795	0.00238351
Otu1648	D_0__Bacteria; D_1__Proteobacteria; D_2__Deltaproteobacteria; D_3__Bdellovibrionales; D_4__Bdellovibrionaceae; D_5__OM27 clade	0.00663478	0	0.000646045	0.00530773	0.000681002
Otu4752	D_0__Bacteria; D_1__Proteobacteria; D_2__Deltaproteobacteria; D_3__Myxococcales; D_4__P3OB-42; D_5__uncultured bacterium; D_6__uncultured bacterium	0.00661367	0	0.000323022	0.00629064	0
Otu3111	D_0__Bacteria; D_1__Proteobacteria; D_2__Alphaproteobacteria; D_3__Rhizobiales	0.00661177	0.00178119	0.00129209	0.00353849	0
Otu3420	D_0__Bacteria; D_1__Proteobacteria; D_2__Gammaproteobacteria; D_3__Oceanospirillales; D_4__Oceanospirillaceae; D_5__Marinomonas; D_6__uncultured bacterium	0.00657542	0.000593731	0.000323022	0.00157266	0.00408601
Otu2667	D_0__Bacteria; D_1__Firmicutes; D_2__Bacilli; D_3__Lactobacillales; D_4__Aerococcaceae	0.00657422	0.00237492	0.00419929	0	0
Otu2050	D_0__Bacteria; D_1__Proteobacteria; D_2__Alphaproteobacteria; D_3__Alphaproteobacteria Incertae Sedis; D_4__Unknown Family; D_5__uncultured; D_6__uncultured bacterium	0.00657189	0.00267179	0.000323022	0.00255557	0.0010215
Otu3476	D_0__Bacteria; D_1__Bacteroidetes; D_2__Flavobacteriia; D_3__Flavobacteriales; D_4__Flavobacteriaceae; D_5__uncultured; D_6__uncultured bacterium	0.00656299	0.000296865	0.000646045	0.00255557	0.00306451
Otu4451	D_0__Bacteria; D_1__Proteobacteria; D_2__AEGEAN-245; Ambiguous_taxa; Ambiguous_taxa; Ambiguous_taxa; Ambiguous_taxa	0.00651737	0.000296865	0.000323022	0.00589748	0
Otu3590	D_0__Bacteria; D_1__Proteobacteria; D_2__Deltaproteobacteria; D_3__NB1-j; D_4__uncultured bacterium; D_5__uncultured bacterium; D_6__uncultured bacterium	0.00650456	0.000890596	0.00419929	0.000393165	0.0010215
Otu2624	D_0__Bacteria; D_1__Bacteroidetes; D_2__Flavobacteriia; D_3__Flavobacteriales; D_4__Flavobacteriaceae	0.00648723	0	0	0.00648723	0
Otu3647	D_0__Bacteria; D_1__Firmicutes; D_2__Bacilli; D_3__Lactobacillales; D_4__Leuconostocaceae; D_5__Leuconostoc; D_6__Leuconostoc lactis	0.00648723	0	0	0.00648723	0
Otu2700	D_0__Bacteria; D_1__Proteobacteria; D_2__Gammaproteobacteria; D_3__Gammaproteobacteria Incertae Sedis; D_4__Unknown Family; D_5__uncultured; D_6__uncultured bacterium	0.00648065	0	0.00226116	0.00353849	0.000681002
Otu2320	D_0__Bacteria; D_1__Proteobacteria; D_2__Alphaproteobacteria; D_3__Rhodobacterales; D_4__Rhodobacteraceae; D_5__uncultured; D_6__uncultured bacterium	0.00647429	0	0.00549138	0.000982913	0
Otu2933	D_0__Bacteria; D_1__Proteobacteria; D_2__SPOTSOCT00m83; D_3__uncultured bacterium; D_4__uncultured bacterium; D_5__uncultured bacterium; D_6__uncultured bacterium	0.00646045	0	0.00646045	0	0
Otu3970	D_0__Bacteria; D_1__Proteobacteria; D_2__Deltaproteobacteria; D_3__NB1-j; D_4__uncultured bacterium; D_5__uncultured bacterium; D_6__uncultured bacterium	0.00646045	0	0.00646045	0	0
Otu2693	D_0__Bacteria; D_1__Proteobacteria; D_2__Deltaproteobacteria; D_3__NB1-j; D_4__uncultured bacterium; D_5__uncultured bacterium; D_6__uncultured bacterium	0.00645953	0	0.00193813	0.0045214	0
Otu2766	D_0__Bacteria; D_1__Proteobacteria; D_2__Alphaproteobacteria; D_3__Rhodobacterales; D_4__Rhodobacteraceae; D_5__uncultured; D_6__uncultured bacterium	0.00644426	0.00296865	0.00161511	0.0011795	0.000681002
Otu2226	D_0__Bacteria; D_1__Bacteroidetes; D_2__Flavobacteriia; D_3__Flavobacteriales; D_4__NS9 marine group; Ambiguous_taxa; Ambiguous_taxa	0.0064391	0.00267179	0.00323022	0.000196583	0.000340501
Otu2323	D_0__Bacteria; D_1__Firmicutes; D_2__Clostridia; D_3__Clostridiales; D_4__Clostridiaceae 1; D_5__Candidatus Arthromitus; D_6__uncultured bacterium	0.00643854	0.000593731	0	0.00550431	0.000340501
Otu2505	D_0__Bacteria; D_1__Firmicutes; D_2__Clostridia; D_3__Clostridiales; D_4__Clostridiaceae 1; D_5__Clostridium sensu stricto 1; D_6__uncultured bacterium	0.00643456	0	0	0.00609406	0.000340501
Otu3178	D_0__Bacteria; D_1__Actinobacteria; D_2__Actinobacteria; D_3__Corynebacteriales; D_4__Corynebacteriaceae; D_5__Corynebacterium 1; D_6__uncultured bacterium	0.00643456	0	0	0.00609406	0.000340501
Otu1494	D_0__Bacteria; D_1__Bacteroidetes; D_2__Flavobacteriia; D_3__Flavobacteriales; D_4__NS7 marine group	0.00641727	0.00415612	0.00226116	0	0
Otu1839	D_0__Bacteria; D_1__Proteobacteria; D_2__Alphaproteobacteria; D_3__Rickettsiales; D_4__SM2D12; D_5__uncultured bacterium; D_6__uncultured bacterium	0.00640252	0.00148433	0.000646045	0.00393165	0.000340501
Otu1786	D_0__Bacteria; D_1__Saccharibacteria; D_2__uncultured bacterium; D_3__uncultured bacterium; D_4__uncultured bacterium; D_5__uncultured bacterium; D_6__uncultured bacterium	0.00640217	0.000890596	0.00129209	0.00353849	0.000681002
Otu3924	D_0__Bacteria; D_1__Bacteroidetes; D_2__Flavobacteriia; D_3__Flavobacteriales; D_4__Flavobacteriaceae; D_5__Flavobacterium	0.00638244	0.00474985	0.00129209	0	0.000340501
Otu3694	D_0__Bacteria; D_1__Proteobacteria; D_2__Deltaproteobacteria; D_3__Myxococcales; D_4__BIrii41; D_5__uncultured bacterium; D_6__uncultured bacterium	0.00637448	0.000890596	0.00323022	0.00157266	0.000681002
Otu2819	D_0__Bacteria; D_1__Proteobacteria; D_2__Alphaproteobacteria; D_3__Rickettsiales; D_4__SM2D12; D_5__uncultured bacterium; D_6__uncultured bacterium	0.00636532	0.00267179	0.0029072	0.00078633	0
Otu3470	D_0__Bacteria; D_1__Proteobacteria; D_2__Deltaproteobacteria; D_3__Myxococcales; D_4__P3OB-42; D_5__uncultured bacterium; D_6__uncultured bacterium	0.00636496	0.00474985	0.00161511	0	0
Otu2807	D_0__Bacteria; D_1__Lentisphaerae; D_2__Lentisphaeria; D_3__Lentisphaerales; D_4__Lentisphaeraceae; D_5__Lentisphaera; D_6__uncultured bacterium	0.00635582	0.00118746	0.00516836	0	0
Otu2395	D_0__Bacteria; D_1__Proteobacteria; D_2__Alphaproteobacteria; D_3__Rhodobacterales; D_4__Rhodobacteraceae	0.00634986	0.00148433	0.000646045	0.00353849	0.000681002
Otu3565	D_0__Bacteria; D_1__Bacteroidetes; D_2__Cytophagia; D_3__Cytophagales; D_4__Flammeovirgaceae; D_5__uncultured; D_6__uncultured organism	0.00634785	0	0.00516836	0.0011795	0
Otu1384	D_0__Bacteria; D_1__Proteobacteria; D_2__Alphaproteobacteria; D_3__Rhodobacterales; D_4__Rhodobacteraceae; D_5__uncultured; D_6__uncultured alpha proteobacterium	0.00631937	0.000593731	0.000969067	0.00373507	0.0010215
Otu3946	D_0__Bacteria; D_1__Parcubacteria; D_2__uncultured bacterium; D_3__uncultured bacterium; D_4__uncultured bacterium; D_5__uncultured bacterium; D_6__uncultured bacterium	0.00631699	0.00385925	0.00226116	0.000196583	0
Otu2829	D_0__Bacteria; D_1__Acidobacteria; D_2__Holophagae; D_3__Subgroup 10; D_4__CA002; D_5__uncultured bacterium; D_6__uncultured bacterium	0.00631264	0.00534358	0.000969067	0	0
Otu4622	D_0__Bacteria; D_1__Actinobacteria; D_2__Acidimicrobiia; D_3__Acidimicrobiales; D_4__Acidimicrobiaceae; D_5__Ilumatobacter; Ambiguous_taxa	0.00630399	0.000296865	0.00419929	0.00078633	0.0010215
Otu1711	D_0__Bacteria; D_1__Bacteroidetes; D_2__Flavobacteriia; D_3__Flavobacteriales; D_4__Flavobacteriaceae; D_5__Gillisia	0.00629064	0	0	0.00629064	0
Otu1333	D_0__Bacteria; D_1__Actinobacteria; D_2__Actinobacteria; D_3__Micrococcales; D_4__Micrococcaceae	0.0062884	0.00118746	0.00161511	0.00314532	0.000340501
Otu2338	D_0__Bacteria; D_1__Proteobacteria; D_2__Gammaproteobacteria; D_3__E01-9C-26 marine group; Ambiguous_taxa; Ambiguous_taxa; Ambiguous_taxa	0.00628043	0	0.00161511	0.00432482	0.000340501
Otu1385	D_0__Bacteria; D_1__Actinobacteria; D_2__Actinobacteria; D_3__Micrococcales; D_4__Microbacteriaceae	0.00626812	0.000296865	0.000323022	0.00530773	0.000340501
Otu4905	D_0__Bacteria; D_1__Proteobacteria; D_2__Alphaproteobacteria; D_3__Rhodobacterales; D_4__Rhodobacteraceae; D_5__Octadecabacter	0.00626706	0.00118746	0.000323022	0.00373507	0.0010215
Otu3653	D_0__Bacteria; D_1__Proteobacteria; D_2__Gammaproteobacteria; D_3__Thiotrichales; D_4__Thiotrichales Incertae Sedis	0.006256	0.00474985	0.000969067	0.000196583	0.000340501
Otu4011	D_0__Bacteria; D_1__Firmicutes; D_2__Clostridia; D_3__Clostridiales; D_4__Family XIII; D_5__Mogibacterium	0.00625119	0.00237492	0.00387627	0	0
Otu4849	D_0__Bacteria; D_1__Firmicutes; D_2__Clostridia; D_3__Clostridiales; D_4__Lachnospiraceae; D_5__Lachnospiraceae XPB1014 group; Ambiguous_taxa	0.00624286	0.00326552	0.00258418	0.000393165	0
Otu2508	D_0__Bacteria; D_1__Bacteroidetes; D_2__Flavobacteriia; D_3__Flavobacteriales; D_4__NS9 marine group; Ambiguous_taxa; Ambiguous_taxa	0.0062302	0.00296865	0.00193813	0.000982913	0.000340501
Otu2310	D_0__Bacteria; D_1__Proteobacteria; D_2__Gammaproteobacteria; D_3__Pseudomonadales; D_4__Moraxellaceae; D_5__Acinetobacter; D_6__uncultured Acinetobacter sp.	0.00622504	0.00267179	0.00355325	0	0
Otu4499	D_0__Bacteria; D_1__Proteobacteria; D_2__Deltaproteobacteria; D_3__NB1-j; D_4__uncultured bacterium; D_5__uncultured bacterium; D_6__uncultured bacterium	0.00622142	0	0.00484534	0.00137608	0
Otu2206	D_0__Bacteria; D_1__Firmicutes; D_2__Clostridia; D_3__Clostridiales; D_4__Peptostreptococcaceae; D_5__Peptoclostridium; D_6__uncultured bacterium	0.00621671	0.00356238	0.00226116	0.000393165	0
Otu3089	D_0__Bacteria; D_1__Peregrinibacteria	0.00620418	0.00118746	0.00193813	0.00137608	0.0017025
Otu2511	D_0__Bacteria; D_1__Firmicutes; D_2__Erysipelotrichia; D_3__Erysipelotrichales; D_4__Erysipelotrichaceae; D_5__Holdemanella; D_6__uncultured bacterium	0.0061902	0.00326552	0.00258418	0	0.000340501
Otu1184	Unassigned	0.0061893	0.000593731	0	0.00491457	0.000681002
Otu4861	D_0__Bacteria; D_1__Proteobacteria; D_2__Gammaproteobacteria; D_3__E01-9C-26 marine group	0.00618531	0	0	0.00550431	0.000681002
Otu2649	D_0__Bacteria; D_1__Proteobacteria; D_2__Deltaproteobacteria; D_3__Bdellovibrionales; D_4__Bdellovibrionaceae; D_5__Bdellovibrio	0.00616875	0	0.00484534	0.000982913	0.000340501
Otu3074	D_0__Bacteria; D_1__Bacteroidetes; D_2__Bacteroidetes Incertae Sedis; D_3__Order II; D_4__Rhodothermaceae; D_5__uncultured; Ambiguous_taxa	0.00615491	0	0.0058144	0	0.000340501
Otu4340	D_0__Bacteria; D_1__Firmicutes; D_2__Clostridia; D_3__Clostridiales; D_4__Eubacteriaceae; D_5__Acetobacterium; Ambiguous_taxa	0.00615036	0	0.000646045	0.00550431	0
Otu1802	D_0__Bacteria; D_1__Proteobacteria; D_2__Gammaproteobacteria; D_3__Gammaproteobacteria Incertae Sedis; D_4__Unknown Family; D_5__Thiohalophilus	0.00614965	0.00148433	0	0.00432482	0.000340501
Otu2501	D_0__Bacteria; D_1__Proteobacteria; D_2__Gammaproteobacteria; D_3__Oceanospirillales; D_4__Oceanospirillaceae; D_5__Pseudohongiella	0.00613743	0	0.00613743	0	0
Otu3018	D_0__Bacteria; D_1__Proteobacteria; D_2__Gammaproteobacteria; D_3__Cellvibrionales	0.00613743	0	0.00613743	0	0
Otu3092	D_0__Bacteria; D_1__Proteobacteria; D_2__Gammaproteobacteria; D_3__Xanthomonadales	0.00613743	0	0.00613743	0	0
Otu3310	D_0__Bacteria; D_1__Proteobacteria; D_2__Gammaproteobacteria; D_3__Xanthomonadales; D_4__JTB255 marine benthic group	0.00613743	0	0.00613743	0	0
Otu3577	D_0__Bacteria; D_1__Proteobacteria; D_2__Gammaproteobacteria; D_3__Xanthomonadales; D_4__JTB255 marine benthic group	0.00613743	0	0.00613743	0	0
Otu2489	Unassigned	0.0061242	0.000296865	0.000323022	0.00550431	0
Otu2181	D_0__Bacteria; D_1__Planctomycetes; D_2__OM190; D_3__uncultured bacterium; D_4__uncultured bacterium; D_5__uncultured bacterium; D_6__uncultured bacterium	0.00611127	0.000296865	0.0058144	0	0
Otu2861	D_0__Bacteria; D_1__Acidobacteria; D_2__Subgroup 22	0.00611127	0.000296865	0.0058144	0	0
Otu3855	D_0__Bacteria; D_1__Proteobacteria; D_2__Deltaproteobacteria; D_3__Bdellovibrionales; D_4__Bacteriovoracaceae; D_5__Peredibacter; D_6__uncultured bacterium	0.00609978	0.00237492	0.00161511	0.00176924	0.000340501
Otu2745	D_0__Bacteria; D_1__Proteobacteria; D_2__Deltaproteobacteria; D_3__Myxococcales; D_4__Blfdi19	0.00609425	0.00415612	0.00193813	0	0
Otu2070	D_0__Bacteria; D_1__Proteobacteria; D_2__Gammaproteobacteria; D_3__Oceanospirillales; D_4__Alcanivoracaceae; D_5__Kangiella; D_6__uncultured bacterium	0.00609406	0	0	0.00609406	0
Otu3026	D_0__Bacteria; D_1__Proteobacteria; D_2__Gammaproteobacteria; D_3__Thiotrichales; D_4__Piscirickettsiaceae; D_5__Marine Methylotrophic Group 3; Ambiguous_taxa	0.00609265	0.000296865	0.000646045	0.00412823	0.0010215
Otu2280	D_0__Bacteria; D_1__Nitrospinae; D_2__Nitrospinia; D_3__Nitrospinales; D_4__Nitrospinaceae; D_5__Nitrospina; D_6__uncultured bacterium	0.00607244	0.00296865	0.0029072	0.000196583	0
Otu4644	D_0__Bacteria; D_1__Proteobacteria; D_2__Gammaproteobacteria; D_3__Oceanospirillales; D_4__Oceanospirillaceae; D_5__Profundimonas; Ambiguous_taxa	0.00606906	0.00148433	0.000969067	0.00157266	0.00204301
Otu3222	D_0__Bacteria; D_1__Bacteroidetes; D_2__Flavobacteriia; D_3__Flavobacteriales; D_4__Flavobacteriaceae; D_5__Polaribacter 1	0.00606003	0.00118746	0.000969067	0.0011795	0.00272401
Otu4151	D_0__Bacteria; D_1__Proteobacteria; D_2__Deltaproteobacteria; D_3__Desulfurellales; D_4__Desulfurellaceae; D_5__H16; D_6__uncultured delta proteobacterium	0.00605063	0.00178119	0.00387627	0.000393165	0
Otu3316	D_0__Bacteria; D_1__Proteobacteria; D_2__Gammaproteobacteria; D_3__Thiotrichales; D_4__H2-104-2; D_5__uncultured bacterium; D_6__uncultured bacterium	0.00604628	0.00326552	0.00258418	0.000196583	0
Otu2472	Unassigned	0.00604194	0.00474985	0.00129209	0	0
Otu1320	D_0__Bacteria; D_1__Nitrospinae; D_2__Nitrospinia; D_3__Nitrospinales; D_4__Nitrospinaceae; D_5__uncultured; Ambiguous_taxa	0.0060414	0	0	0.0057009	0.000340501
Otu1905	D_0__Bacteria; D_1__Chloroflexi; D_2__Caldilineae; D_3__Caldilineales; D_4__Caldilineaceae; D_5__uncultured; D_6__uncultured bacterium	0.00604021	0.000296865	0.00161511	0.00412823	0
Otu2683	D_0__Bacteria; D_1__Proteobacteria; D_2__Deltaproteobacteria; D_3__Bdellovibrionales; D_4__Bacteriovoracaceae; D_5__uncultured; D_6__uncultured bacterium	0.00601781	0.00118746	0.000323022	0.00314532	0.001362
Otu2262	D_0__Bacteria; D_1__Acidobacteria; D_2__Holophagae; D_3__Subgroup 10; D_4__Sva0725; D_5__uncultured bacterium; D_6__uncultured bacterium	0.00601371	0	0.00193813	0.00373507	0.000340501
Otu2614	Unassigned	0.00601371	0	0.00193813	0.00373507	0.000340501
Otu2548	D_0__Bacteria; D_1__Saccharibacteria; D_2__uncultured bacterium; D_3__uncultured bacterium; D_4__uncultured bacterium; D_5__uncultured bacterium; D_6__uncultured bacterium	0.00600818	0.00178119	0.00226116	0.00196583	0
Otu3108	D_0__Bacteria; D_1__Planctomycetes; D_2__BD7-11; D_3__uncultured bacterium; D_4__uncultured bacterium; D_5__uncultured bacterium; D_6__uncultured bacterium	0.00600266	0.000890596	0.00452231	0.000589748	0
Otu3351	D_0__Bacteria; D_1__Proteobacteria; D_2__Gammaproteobacteria	0.00600243	0.000890596	0.00355325	0.000196583	0.001362
Otu4642	D_0__Bacteria; D_1__Proteobacteria; D_2__Alphaproteobacteria; D_3__Rhodospirillales; D_4__MSB-1E8; D_5__uncultured bacterium; D_6__uncultured bacterium	0.00599868	0.000296865	0.00452231	0.0011795	0
Otu1788	D_0__Bacteria; D_1__Actinobacteria; D_2__Actinobacteria; D_3__Propionibacteriales; D_4__Nocardioidaceae; D_5__Aeromicrobium; Ambiguous_taxa	0.00599236	0	0.000646045	0.00432482	0.0010215
Otu4382	D_0__Bacteria; D_1__Proteobacteria; D_2__Gammaproteobacteria; D_3__Oceanospirillales	0.00598962	0.00534358	0.000646045	0	0
Otu4326	D_0__Bacteria; D_1__Proteobacteria; D_2__Gammaproteobacteria; D_3__Oceanospirillales; D_4__OM182 clade; D_5__uncultured bacterium; D_6__uncultured bacterium	0.00598873	0	0	0.00530773	0.000681002
Otu2355	D_0__Bacteria; D_1__Bacteroidetes; D_2__Flavobacteriia; D_3__Flavobacteriales; D_4__NS9 marine group	0.00597662	0.00178119	0.00258418	0.000589748	0.0010215
Otu2387	D_0__Bacteria; D_1__Bacteroidetes; D_2__Flavobacteriia; D_3__Flavobacteriales; D_4__Flavobacteriaceae; D_5__Aquimarina	0.00597615	0.000593731	0.00484534	0.000196583	0.000340501
Otu2635	D_0__Bacteria; D_1__Proteobacteria; D_2__Gammaproteobacteria; D_3__Alteromonadales; D_4__Colwelliaceae; D_5__Thalassotalea	0.00596747	0.000890596	0.00419929	0.000196583	0.000681002
Otu2486	D_0__Bacteria; D_1__Bacteroidetes; D_2__Flavobacteriia; D_3__Flavobacteriales; D_4__Flavobacteriaceae; D_5__Aquimarina; Ambiguous_taxa	0.00595867	0.000593731	0.00516836	0.000196583	0
Otu3086	D_0__Bacteria; D_1__Firmicutes; D_2__Clostridia; D_3__Clostridiales; D_4__Lachnospiraceae; D_5__Blautia; D_6__uncultured bacterium	0.00594565	0.00237492	0.00323022	0	0.000340501
Otu3569	D_0__Bacteria; D_1__Proteobacteria; D_2__Gammaproteobacteria; D_3__Cellvibrionales; D_4__Halieaceae	0.00594356	0	0.00226116	0.0033419	0.000340501
Otu2225	D_0__Bacteria; D_1__Proteobacteria; D_2__Gammaproteobacteria; D_3__Chromatiales; D_4__Ectothiorhodospiraceae	0.00592903	0	0.000323022	0.0011795	0.00442651
Otu1991	D_0__Bacteria; D_1__Acidobacteria; D_2__Holophagae; D_3__Subgroup 10; D_4__Sva0725; Ambiguous_taxa; Ambiguous_taxa	0.00592762	0.000296865	0.000323022	0.00530773	0
Otu2581	D_0__Bacteria; D_1__Proteobacteria; D_2__Gammaproteobacteria; D_3__Xanthomonadales; D_4__JTB255 marine benthic group; D_5__uncultured gamma proteobacterium; D_6__uncultured gamma proteobacterium	0.00591224	0	0.00355325	0.00235899	0
Otu2747	D_0__Bacteria; D_1__Firmicutes; D_2__Bacilli; D_3__Bacillales; D_4__Bacillaceae; D_5__uncultured	0.00589748	0	0	0.00589748	0
Otu2203	D_0__Bacteria; D_1__Proteobacteria; D_2__Deltaproteobacteria; D_3__Bdellovibrionales; D_4__Bdellovibrionaceae; D_5__OM27 clade; D_6__uncultured bacterium	0.00588455	0	0.00549138	0.000393165	0
Otu2138	D_0__Bacteria; D_1__Bacteroidetes; D_2__Cytophagia; D_3__Cytophagales; D_4__Flammeovirgaceae; D_5__Marinoscillum; Ambiguous_taxa	0.00584102	0.00356238	0.00193813	0	0.000340501
Otu1933	D_0__Bacteria; D_1__Proteobacteria; D_2__Gammaproteobacteria; D_3__Legionellales; D_4__Coxiellaceae; D_5__Aquicella; D_6__uncultured gamma proteobacterium	0.00583437	0	0.000646045	0.00314532	0.00204301
Otu2751	D_0__Bacteria; D_1__Proteobacteria; D_2__Gammaproteobacteria; D_3__KI89A clade; D_4__uncultured bacterium; D_5__uncultured bacterium; D_6__uncultured bacterium	0.00583188	0	0.00549138	0	0.000340501
Otu3541	D_0__Bacteria; D_1__Planctomycetes; D_2__Pla3 lineage; D_3__uncultured planctomycete; D_4__uncultured planctomycete; D_5__uncultured planctomycete; D_6__uncultured planctomycete	0.00583188	0	0.00549138	0	0.000340501
Otu1473	D_0__Bacteria; D_1__Firmicutes; D_2__Clostridia; D_3__Clostridiales; D_4__Clostridiaceae 1; D_5__Clostridium sensu stricto 7	0.00582734	0	0.000323022	0.00550431	0
Otu2258	D_0__Bacteria; D_1__Proteobacteria; D_2__Gammaproteobacteria; D_3__KI89A clade; D_4__uncultured bacterium; D_5__uncultured bacterium; D_6__uncultured bacterium	0.0058144	0	0.0058144	0	0
Otu3568	D_0__Bacteria; D_1__Bacteroidetes; D_2__Sphingobacteriia; D_3__Sphingobacteriales; D_4__uncultured	0.00581326	0	0.000323022	0.00412823	0.001362
Otu4911	D_0__Bacteria; D_1__Proteobacteria; D_2__Alphaproteobacteria; D_3__Rhodobacterales; D_4__Rhodobacteraceae; D_5__Planktotalea	0.00581065	0.00326552	0.000646045	0.000196583	0.0017025
Otu2278	D_0__Bacteria; D_1__Lentisphaerae; D_2__Lentisphaeria; D_3__Victivallales; D_4__BD2-3	0.0058069	0.00267179	0.00161511	0.0011795	0.000340501
Otu1837	D_0__Bacteria; D_1__Proteobacteria; D_2__Gammaproteobacteria; D_3__Legionellales; D_4__Legionellaceae; D_5__Legionella; D_6__uncultured bacterium	0.00580118	0.000296865	0	0.00550431	0
Otu2623	D_0__Bacteria; D_1__Actinobacteria; D_2__Actinobacteria; D_3__Frankiales; D_4__Geodermatophilaceae; D_5__Blastococcus; D_6__uncultured bacterium	0.00580118	0.000296865	0	0.00550431	0
Otu4368	D_0__Bacteria; D_1__Proteobacteria; D_2__Gammaproteobacteria; D_3__Pseudomonadales; D_4__Pseudomonadaceae; D_5__Pseudomonas	0.00576963	0.000296865	0.000323022	0.00412823	0.0010215
Otu1805	D_0__Bacteria; D_1__Firmicutes; D_2__Clostridia; D_3__Clostridiales; D_4__Family XIII; D_5__Family XIII AD3011 group; D_6__uncultured bacterium	0.00576516	0.00118746	0.000646045	0.00393165	0
Otu1966	D_0__Bacteria; D_1__Proteobacteria; D_2__Gammaproteobacteria; D_3__Gammaproteobacteria Incertae Sedis; D_4__Unknown Family; D_5__uncultured	0.00575811	0	0.00516836	0.000589748	0
Otu3048	D_0__Bacteria; D_1__Proteobacteria; D_2__Deltaproteobacteria; D_3__Bdellovibrionales; D_4__Bdellovibrionaceae; D_5__OM27 clade; D_6__uncultured delta proteobacterium	0.00574942	0.00296865	0.00258418	0.000196583	0
Otu2503	D_0__Bacteria; D_1__Lentisphaerae; D_2__Oligosphaeria; D_3__P.palmC41; D_4__uncultured bacterium; D_5__uncultured bacterium; D_6__uncultured bacterium	0.00574507	0.00445298	0.00129209	0	0
Otu4056	D_0__Bacteria; D_1__Firmicutes; D_2__Clostridia; D_3__Clostridiales; D_4__Clostridiaceae 4; D_5__Caminicella; D_6__uncultured bacterium	0.00574507	0.00445298	0.00129209	0	0
Otu1141	D_0__Bacteria; D_1__Bacteroidetes; D_2__Flavobacteriia; D_3__Flavobacteriales; D_4__Flavobacteriaceae	0.00573949	0	0	0.00471798	0.0010215
Otu2630	D_0__Bacteria; D_1__Proteobacteria; D_2__Gammaproteobacteria; D_3__X35; D_4__uncultured bacterium; D_5__uncultured bacterium; D_6__uncultured bacterium	0.00572939	0.000593731	0	0.00275216	0.00238351
Otu4591	D_0__Bacteria; D_1__Proteobacteria; D_2__Deltaproteobacteria; D_3__Bdellovibrionales; D_4__Bacteriovoracaceae; D_5__Peredibacter; D_6__uncultured bacterium	0.0057276	0.00178119	0.00355325	0.000393165	0
Otu4683	D_0__Bacteria; D_1__Proteobacteria; D_2__Gammaproteobacteria; D_3__Alteromonadales; D_4__Alteromonadaceae; D_5__Aestuariibacter	0.00571976	0.00118746	0.00193813	0.00157266	0.0010215
Otu3277	D_0__Bacteria; D_1__Proteobacteria; D_2__Epsilonproteobacteria; D_3__Campylobacterales; D_4__Campylobacteraceae; D_5__Arcobacter; D_6__uncultured bacterium	0.00571458	0.00356238	0.00161511	0.000196583	0.000340501
Otu2880	D_0__Bacteria; D_1__Proteobacteria; D_2__Gammaproteobacteria; D_3__Oceanospirillales	0.00570978	0.00118746	0.00452231	0	0
Otu4616	D_0__Bacteria; D_1__Proteobacteria; D_2__Gammaproteobacteria; D_3__Gammaproteobacteria Incertae Sedis; D_4__Unknown Family; D_5__uncultured; D_6__uncultured bacterium	0.00570181	0	0.00452231	0.0011795	0
Otu2618	D_0__Bacteria; D_1__Saccharibacteria; D_2__uncultured bacterium; D_3__uncultured bacterium; D_4__uncultured bacterium; D_5__uncultured bacterium; D_6__uncultured bacterium	0.0057009	0	0	0.0057009	0
Otu4920	D_0__Bacteria; D_1__Proteobacteria; D_2__Betaproteobacteria; D_3__Nitrosomonadales; D_4__Nitrosomonadaceae; D_5__Nitrosospira	0.00569711	0.000890596	0.00387627	0.000589748	0.000340501
Otu4250	D_0__Bacteria; D_1__Firmicutes; D_2__Bacilli; D_3__Bacillales; D_4__Bacillaceae; D_5__Anoxybacillus	0.00569276	0.00504671	0.000646045	0	0
Otu4914	D_0__Bacteria; D_1__Verrucomicrobia; D_2__R76-B128; D_3__uncultured bacterium; D_4__uncultured bacterium; D_5__uncultured bacterium; D_6__uncultured bacterium	0.00569276	0.00504671	0.000646045	0	0
Otu2199	D_0__Bacteria; D_1__Proteobacteria; D_2__Gammaproteobacteria; D_3__Gammaproteobacteria Incertae Sedis; D_4__Unknown Family; D_5__uncultured	0.00564823	0	0	0.00530773	0.000340501
Otu3003	D_0__Bacteria; D_1__Bacteroidetes; D_2__Bacteroidia; D_3__Bacteroidales; D_4__Porphyromonadaceae; D_5__Petrimonas; D_6__uncultured bacterium	0.00564823	0	0	0.00530773	0.000340501
Otu3240	D_0__Bacteria; D_1__Actinobacteria; D_2__Actinobacteria; D_3__Micrococcales; D_4__Intrasporangiaceae	0.00564823	0	0	0.00530773	0.000340501
Otu4338	D_0__Bacteria; D_1__Proteobacteria; D_2__Deltaproteobacteria; D_3__Bdellovibrionales; D_4__Bacteriovoracaceae; D_5__Peredibacter; D_6__uncultured bacterium	0.00563872	0.00118746	0.000323022	0.00412823	0
Otu2856	D_0__Bacteria; D_1__Firmicutes; D_2__Clostridia; D_3__Clostridiales; D_4__Clostridiales vadinBB60 group; D_5__uncultured bacterium; D_6__uncultured bacterium	0.00563837	0.000593731	0.000969067	0.00373507	0.000340501
Otu3905	D_0__Bacteria; D_1__Bacteroidetes; D_2__Sphingobacteriia; D_3__Sphingobacteriales; D_4__Lentimicrobiaceae	0.00562934	0.000296865	0.000969067	0.0033419	0.0010215
Otu3868	D_0__Bacteria; D_1__Proteobacteria; D_2__Alphaproteobacteria; D_3__Alphaproteobacteria Incertae Sedis; D_4__uncultured; D_5__uncultured bacterium; D_6__uncultured bacterium	0.00562571	0.000296865	0.000323022	0.00432482	0.000681002
Otu2054	D_0__Bacteria; D_1__Proteobacteria; D_2__Gammaproteobacteria; D_3__Oceanospirillales	0.00562371	0	0.000646045	0.00157266	0.00340501
Otu3315	D_0__Bacteria; D_1__Bacteroidetes; D_2__Cytophagia; D_3__Cytophagales; D_4__Flammeovirgaceae; D_5__Marinoscillum; Ambiguous_taxa	0.0056143	0.00326552	0.00161511	0.000393165	0.000340501
Otu4266	D_0__Bacteria; D_1__Proteobacteria; D_2__Deltaproteobacteria; D_3__Bdellovibrionales; D_4__Bdellovibrionaceae; D_5__OM27 clade; D_6__uncultured bacterium	0.00561186	0.000296865	0.00129209	0.0033419	0.000681002
Otu3156	D_0__Bacteria; D_1__Planctomycetes; D_2__Pla4 lineage; D_3__uncultured bacterium; D_4__uncultured bacterium; D_5__uncultured bacterium; D_6__uncultured bacterium	0.00559718	0.00118746	0.00323022	0.0011795	0
Otu4812	D_0__Bacteria; D_1__Proteobacteria; D_2__Deltaproteobacteria; D_3__Desulfuromonadales; D_4__Desulfuromonadaceae; D_5__Desulfuromusa; D_6__uncultured bacterium	0.00557899	0.00267179	0.0029072	0	0
Otu4292	D_0__Bacteria; D_1__Proteobacteria; D_2__Gammaproteobacteria	0.00556635	0.000890596	0	0.000589748	0.00408601
Otu4025	D_0__Bacteria; D_1__Proteobacteria; D_2__Gammaproteobacteria; D_3__Enterobacteriales; D_4__Enterobacteriaceae; D_5__Buchnera	0.00555334	0	0	0.00078633	0.00476701
Otu2457	D_0__Bacteria; D_1__Proteobacteria; D_2__Gammaproteobacteria; D_3__Thiotrichales; D_4__Thiotrichales Incertae Sedis; D_5__Caedibacter	0.00555283	0.00296865	0.00258418	0	0
Otu3699	D_0__Bacteria; D_1__Planctomycetes; D_2__OM190; Ambiguous_taxa; Ambiguous_taxa; Ambiguous_taxa; Ambiguous_taxa	0.00555283	0.00296865	0.00258418	0	0
Otu4497	D_0__Bacteria; D_1__Bacteroidetes; D_2__Bacteroidia; D_3__Bacteroidales; D_4__Prevotellaceae; D_5__Prevotella 1; D_6__uncultured rumen bacterium	0.00552668	0.00326552	0.00226116	0	0
Otu4609	D_0__Bacteria; D_1__Proteobacteria; D_2__Alphaproteobacteria; D_3__Rhizobiales	0.00552271	0	0.00419929	0.000982913	0.000340501
Otu3657	D_0__Bacteria; D_1__Bacteroidetes; D_2__Flavobacteriia; D_3__Flavobacteriales; D_4__Flavobacteriaceae	0.00551839	0	0.000646045	0.00078633	0.00408601
Otu3676	D_0__Bacteria; D_1__Proteobacteria; D_2__Deltaproteobacteria; D_3__Bdellovibrionales; D_4__Bacteriovoracaceae; D_5__Peredibacter; D_6__uncultured bacterium	0.00551392	0.000890596	0.000969067	0.000589748	0.00306451
Otu2988	D_0__Bacteria; D_1__Proteobacteria; D_2__Deltaproteobacteria; D_3__Myxococcales; D_4__Nannocystaceae; D_5__Nannocystis	0.00551228	0.00118746	0	0.00432482	0
Otu4218	D_0__Bacteria; D_1__Proteobacteria; D_2__Deltaproteobacteria; D_3__NB1-j; D_4__uncultured bacterium; D_5__uncultured bacterium; D_6__uncultured bacterium	0.00550886	0	0.00516836	0	0.000340501
Otu1898	D_0__Bacteria; D_1__Bacteroidetes; D_2__Cytophagia; D_3__Cytophagales; D_4__Flammeovirgaceae; D_5__uncultured; D_6__uncultured Bacteroidetes bacterium	0.00550605	0.00178119	0.00161511	0.00176924	0.000340501
Otu2017	D_0__Bacteria; D_1__Firmicutes; D_2__Clostridia; D_3__Clostridiales; D_4__Clostridiaceae 1; D_5__Candidatus Arthromitus; D_6__uncultured bacterium	0.00550431	0	0	0.00550431	0
Otu2453	D_0__Bacteria; D_1__Bacteroidetes; D_2__Sphingobacteriia; D_3__Sphingobacteriales; D_4__uncultured; D_5__uncultured bacterium; D_6__uncultured bacterium	0.00550431	0	0	0.00550431	0
Otu3863	D_0__Bacteria; D_1__Proteobacteria; D_2__Alphaproteobacteria; D_3__Alphaproteobacteria Incertae Sedis; D_4__uncultured; D_5__uncultured bacterium; D_6__uncultured bacterium	0.00550064	0.00415612	0.000323022	0	0.0010215
Otu2779	D_0__Bacteria; D_1__Bacteroidetes; D_2__Flavobacteriia; D_3__Flavobacteriales; D_4__Flavobacteriaceae; D_5__Pseudofulvibacter	0.00549184	0.00385925	0.00129209	0	0.000340501
Otu4579	D_0__Bacteria; D_1__Proteobacteria; D_2__Gammaproteobacteria; D_3__Gammaproteobacteria Incertae Sedis; D_4__Unknown Family; D_5__Thiohalophilus	0.00549175	0.00178119	0.000646045	0	0.00306451
Otu4636	D_0__Bacteria; D_1__Proteobacteria; D_2__Alphaproteobacteria; D_3__Rhodospirillales; D_4__Rhodospirillaceae; D_5__Magnetovibrio; D_6__uncultured bacterium	0.00549138	0	0.00549138	0	0
Otu2247	D_0__Bacteria; D_1__Bacteroidetes; D_2__Cytophagia; D_3__Cytophagales; D_4__MWH-CFBk5; D_5__uncultured bacterium; D_6__uncultured bacterium	0.00546641	0	0.00355325	0.00157266	0.000340501
Otu4653	D_0__Bacteria; D_1__Lentisphaerae; D_2__Lentisphaeria; D_3__Victivallales; D_4__Arctic95B-14; D_5__uncultured bacterium; D_6__uncultured bacterium	0.00546535	0.000890596	0.00355325	0	0.0010215
Otu1983	D_0__Bacteria; D_1__Parcubacteria	0.00546522	0.000296865	0.00516836	0	0
Otu2993	D_0__Bacteria; D_1__Planctomycetes; D_2__BD7-11; D_3__uncultured bacterium; D_4__uncultured bacterium; D_5__uncultured bacterium; D_6__uncultured bacterium	0.00546522	0.000296865	0.00516836	0	0
Otu4097	D_0__Bacteria; D_1__Proteobacteria; D_2__Deltaproteobacteria; D_3__Desulfobacterales; D_4__Desulfobacteraceae; D_5__Sva0081 sediment group	0.00546522	0.000296865	0.00516836	0	0
Otu2500	D_0__Bacteria; D_1__Proteobacteria; D_2__Alphaproteobacteria; D_3__Rhodospirillales; D_4__Rhodospirillaceae; D_5__uncultured	0.00544857	0.00207806	0.00258418	0.00078633	0
Otu2815	Unassigned	0.00544821	0.00415612	0.00129209	0	0
Otu4261	D_0__Bacteria; D_1__Proteobacteria; D_2__Alphaproteobacteria; D_3__Rhodobacterales; D_4__Rhodobacteraceae; D_5__Breoghania	0.00544801	0	0	0	0.00544801
Otu2510	D_0__Bacteria; D_1__Proteobacteria; D_2__Gammaproteobacteria; D_3__Xanthomonadales; D_4__JTB255 marine benthic group; D_5__uncultured gamma proteobacterium; D_6__uncultured gamma proteobacterium	0.00543508	0	0.00484534	0.000589748	0
Otu1783	D_0__Bacteria; D_1__Actinobacteria; D_2__Actinobacteria; D_3__Micrococcales; D_4__Intrasporangiaceae; D_5__Ornithinimicrobium; Ambiguous_taxa	0.00543417	0	0.000323022	0.00511115	0
Otu2027	D_0__Bacteria; D_1__Bacteroidetes; D_2__Cytophagia; D_3__Cytophagales; D_4__Flammeovirgaceae; D_5__uncultured; D_6__uncultured bacterium	0.00543227	0.00178119	0.00129209	0.00235899	0
Otu2934	D_0__Bacteria; D_1__Proteobacteria; D_2__Deltaproteobacteria; D_3__Myxococcales; D_4__Blfdi19	0.00542205	0.00445298	0.000969067	0	0
Otu2145	D_0__Bacteria; D_1__Cyanobacteria; D_2__ML635J-21; D_3__uncultured bacterium; D_4__uncultured bacterium; D_5__uncultured bacterium; D_6__uncultured bacterium	0.00541926	0.000890596	0.00129209	0.00255557	0.000681002
Otu2957	D_0__Bacteria; D_1__Lentisphaerae; D_2__Lentisphaeria; D_3__Victivallales	0.00541738	0	0.00419929	0.000196583	0.0010215
Otu3842	D_0__Bacteria; D_1__Bacteroidetes; D_2__Flavobacteriia; D_3__Flavobacteriales; D_4__Flavobacteriaceae; D_5__uncultured; Ambiguous_taxa	0.00540458	0.00178119	0.00323022	0.000393165	0
Otu3356	D_0__Bacteria; D_1__Proteobacteria; D_2__Alphaproteobacteria; D_3__Rhizobiales; D_4__Phyllobacteriaceae	0.00539898	0	0	0.00471798	0.000681002
Otu3553	D_0__Bacteria; D_1__Lentisphaerae; D_2__Oligosphaeria; D_3__P.palmC41	0.00539589	0.00474985	0.000646045	0	0
Otu2084	D_0__Bacteria; D_1__Proteobacteria; D_2__Alphaproteobacteria; D_3__Rhizobiales; D_4__Rhodobiaceae; D_5__Rhodobium	0.00536403	0	0.000646045	0.00471798	0
Otu2919	D_0__Bacteria; D_1__Firmicutes; D_2__Clostridia; D_3__Halanaerobiales; D_4__ODP1230B8.23	0.00536403	0	0.000646045	0.00471798	0
Otu3775	D_0__Bacteria; D_1__Proteobacteria; D_2__Gammaproteobacteria; D_3__Vibrionales; D_4__Vibrionaceae; D_5__Vibrio	0.0053606	0.00148433	0.00387627	0	0
Otu3719	D_0__Bacteria; D_1__Proteobacteria; D_2__Deltaproteobacteria; D_3__Desulfuromonadales; D_4__Sva1033; Ambiguous_taxa; Ambiguous_taxa	0.00533492	0.000296865	0.00323022	0.00078633	0.0010215
Otu4440	D_0__Bacteria; D_1__Proteobacteria; D_2__Gammaproteobacteria; D_3__Thiotrichales; D_4__Piscirickettsiaceae; D_5__uncultured	0.00533046	0.00118746	0.00355325	0.000589748	0
Otu2553	D_0__Bacteria; D_1__Lentisphaerae; D_2__Lentisphaeria; D_3__Victivallales; D_4__Arctic95B-14; D_5__uncultured Lentisphaerae bacterium; D_6__uncultured Lentisphaerae bacterium	0.00532588	0.00267179	0.00129209	0	0.001362
Otu2182	D_0__Bacteria; D_1__Bacteroidetes; D_2__Flavobacteriia; D_3__Flavobacteriales; D_4__Flavobacteriaceae; D_5__Aquimarina; Ambiguous_taxa	0.00532402	0.000296865	0.00129209	0.00373507	0
Otu3578	D_0__Bacteria; D_1__Bacteroidetes; D_2__Bacteroidia; D_3__Bacteroidales; D_4__Rikenellaceae; D_5__Alistipes; D_6__uncultured bacterium	0.00531743	0.00296865	0.00161511	0.000393165	0.000340501
Otu4430	D_0__Bacteria; D_1__Bacteroidetes; D_2__Bacteroidia; D_3__Bacteroidales; D_4__Bacteroidaceae; D_5__Bacteroides; D_6__uncultured bacterium	0.00530828	0.00207806	0.00323022	0	0
Otu2379	D_0__Bacteria; D_1__Firmicutes; D_2__Bacilli; D_3__Bacillales; D_4__Bacillaceae; D_5__uncultured; D_6__uncultured bacterium	0.00530773	0	0	0.00530773	0
Otu2595	D_0__Bacteria; D_1__Firmicutes; D_2__Clostridia; D_3__Clostridiales; D_4__Family XII; D_5__Fusibacter; Ambiguous_taxa	0.00530583	0.00178119	0.000969067	0.00255557	0
Otu3632	D_0__Bacteria; D_1__Proteobacteria; D_2__Gammaproteobacteria; D_3__Vibrionales; D_4__Vibrionaceae; D_5__Photobacterium; Ambiguous_taxa	0.00530079	0.00207806	0.000969067	0.00157266	0.000681002
Otu2441	D_0__Bacteria; D_1__Firmicutes; D_2__Clostridia; D_3__Clostridiales; D_4__Ruminococcaceae	0.0052996	0.00237492	0.00258418	0	0.000340501
Otu3131	D_0__Bacteria; D_1__Proteobacteria; D_2__Gammaproteobacteria; D_3__Oceanospirillales; D_4__Oceanospirillaceae; D_5__Amphritea	0.00529128	0.00326552	0.00129209	0.000393165	0.000340501
Otu4036	D_0__Bacteria; D_1__Proteobacteria; D_2__Gammaproteobacteria; D_3__X35	0.00526773	0.000296865	0.000646045	0.00432482	0
Otu3165	D_0__Bacteria; D_1__Proteobacteria; D_2__Alphaproteobacteria; D_3__Rhodobacterales; D_4__Rhodobacteraceae; D_5__uncultured bacterium; D_6__uncultured bacterium	0.0052621	0	0.000323022	0.00255557	0.00238351
Otu1482	D_0__Bacteria; D_1__Spirochaetae; D_2__Spirochaetes; D_3__Spirochaetales; D_4__Spirochaetaceae; D_5__Spirochaeta 2	0.0052587	0	0.000646045	0.00393165	0.000681002
Otu2490	D_0__Bacteria; D_1__Proteobacteria; D_2__Deltaproteobacteria; D_3__Bradymonadales	0.0052385	0	0.00484534	0.000393165	0
Otu3562	D_0__Bacteria; D_1__Proteobacteria; D_2__Alphaproteobacteria; D_3__Alphaproteobacteria Incertae Sedis; D_4__Unknown Family; D_5__uncultured; D_6__uncultured bacterium	0.00523065	0.00207806	0.00129209	0.0011795	0.000681002
Otu2984	D_0__Bacteria; D_1__Actinobacteria; D_2__Actinobacteria; D_3__Propionibacteriales; D_4__Nocardioidaceae; D_5__Nocardioides; D_6__uncultured actinobacterium	0.00522374	0	0.00129209	0.00393165	0
Otu1713	D_0__Bacteria; D_1__Cyanobacteria; D_2__Cyanobacteria; D_3__SubsectionIII; D_4__FamilyI; D_5__uncultured	0.00521143	0.000296865	0	0.00491457	0
Otu2865	D_0__Bacteria; D_1__Proteobacteria; D_2__Gammaproteobacteria; D_3__Cellvibrionales; D_4__Cellvibrionaceae; D_5__uncultured	0.0052024	0	0	0.0045214	0.000681002
Otu3023	D_0__Bacteria; D_1__Proteobacteria; D_2__Deltaproteobacteria; D_3__Bdellovibrionales; D_4__Bacteriovoracaceae; D_5__uncultured; D_6__uncultured bacterium	0.00519605	0	0.00323022	0.00196583	0
Otu2232	D_0__Bacteria; D_1__Proteobacteria; D_2__Alphaproteobacteria; D_3__Rhodobacterales; D_4__Rhodobacteraceae	0.0051863	0.00385925	0.000646045	0	0.000681002
Otu3796	Unassigned	0.0051775	0.00356238	0.00161511	0	0
Otu4285	D_0__Bacteria; D_1__Lentisphaerae; D_2__Oligosphaeria; D_3__P.palmC41	0.0051775	0.00356238	0.00161511	0	0
Otu4661	D_0__Bacteria; D_1__Bacteroidetes; D_2__Flavobacteriia; D_3__Flavobacteriales; D_4__Flavobacteriaceae; D_5__Pseudofulvibacter	0.00516848	0.000593731	0.00355325	0	0.0010215
Otu2000	D_0__Bacteria; D_1__Proteobacteria; D_2__Deltaproteobacteria; D_3__NB1-j; D_4__uncultured bacterium; D_5__uncultured bacterium; D_6__uncultured bacterium	0.00516836	0	0.00516836	0	0
Otu2842	D_0__Bacteria; D_1__Proteobacteria; D_2__Deltaproteobacteria; D_3__Myxococcales; D_4__BIrii41; D_5__uncultured bacterium; D_6__uncultured bacterium	0.00516836	0	0.00516836	0	0
Otu2987	D_0__Bacteria; D_1__Planctomycetes; D_2__OM190	0.00516836	0	0.00516836	0	0
Otu3932	D_0__Bacteria; D_1__Proteobacteria; D_2__Deltaproteobacteria; D_3__NB1-j; Ambiguous_taxa; Ambiguous_taxa; Ambiguous_taxa	0.00516836	0	0.00516836	0	0
Otu4031	D_0__Bacteria; D_1__Proteobacteria; D_2__Deltaproteobacteria; D_3__NB1-j; D_4__uncultured bacterium; D_5__uncultured bacterium; D_6__uncultured bacterium	0.00516836	0	0.00516836	0	0
Otu4294	D_0__Bacteria; D_1__Parcubacteria	0.00516836	0	0.00516836	0	0
Otu2916	D_0__Bacteria; D_1__Spirochaetae; D_2__Spirochaetes; D_3__Spirochaetales; D_4__Spirochaetaceae; D_5__Spirochaeta 2; D_6__uncultured Spirochaetes bacterium	0.00516449	0.00267179	0.00161511	0.000196583	0.000681002
Otu2774	D_0__Bacteria; D_1__Bacteroidetes; D_2__Flavobacteriia; D_3__Flavobacteriales; D_4__NS7 marine group; D_5__uncultured bacterium; D_6__uncultured bacterium	0.00515134	0.00385925	0.00129209	0	0
Otu2797	Unassigned	0.00515134	0.00385925	0.00129209	0	0
Otu2685	D_0__Bacteria; D_1__Bacteroidetes; D_2__Flavobacteriia; D_3__Flavobacteriales; D_4__Cryomorphaceae; D_5__Owenweeksia	0.00514784	0.00178119	0.000969067	0.00137608	0.0010215
Otu3471	D_0__Bacteria; D_1__Firmicutes; D_2__Erysipelotrichia; D_3__Erysipelotrichales; D_4__Erysipelotrichaceae; D_5__[Anaerorhabdus] furcosa group	0.00514302	0.00207806	0.00193813	0.00078633	0.000340501
Otu3376	D_0__Bacteria; D_1__Spirochaetae; D_2__Spirochaetes; D_3__Spirochaetales; D_4__Spirochaetaceae; D_5__Spirochaeta 2; D_6__uncultured bacterium	0.00512518	0.00415612	0.000969067	0	0
Otu4715	D_0__Bacteria; D_1__Proteobacteria; D_2__Gammaproteobacteria; D_3__Oceanospirillales; D_4__Hahellaceae; D_5__Endozoicomonas	0.00511654	0.000296865	0	0.000393165	0.00442651
Otu3015	D_0__Bacteria; D_1__Proteobacteria; D_2__Alphaproteobacteria; D_3__Rhodospirillales; D_4__Rhodospirillaceae; D_5__uncultured; D_6__uncultured bacterium	0.00511605	0.000593731	0.00452231	0	0
Otu4037	D_0__Bacteria; D_1__Proteobacteria; D_2__Alphaproteobacteria; D_3__Rhodobacterales; D_4__Rhodobacteraceae	0.00511253	0.00118746	0.00226116	0.000982913	0.000681002
Otu3598	D_0__Bacteria; D_1__Proteobacteria; D_2__Alphaproteobacteria; D_3__Rhizobiales; D_4__OCS116 clade	0.00511206	0	0.00452231	0.000589748	0
Otu1243	D_0__Bacteria; D_1__Firmicutes; D_2__Clostridia; D_3__Clostridiales; D_4__Family XI	0.00511115	0	0	0.00511115	0
Otu2555	D_0__Bacteria; D_1__Proteobacteria; D_2__Gammaproteobacteria; D_3__Vibrionales; D_4__Vibrionaceae; D_5__Photobacterium; Ambiguous_taxa	0.00510421	0.00207806	0.000969067	0.00137608	0.000681002
Otu4024	D_0__Bacteria; D_1__Lentisphaerae; D_2__Lentisphaeria; D_3__Victivallales; D_4__Arctic95B-14	0.00510373	0.000890596	0.00323022	0.000982913	0
Otu1777	D_0__Bacteria; D_1__Proteobacteria; D_2__Alphaproteobacteria; D_3__Rhodobacterales; D_4__Rhodobacteraceae	0.00509707	0	0	0.00373507	0.001362
Otu4604	D_0__Bacteria; D_1__Planctomycetes; D_2__BD7-11; D_3__uncultured bacterium; D_4__uncultured bacterium; D_5__uncultured bacterium; D_6__uncultured bacterium	0.00508989	0.000890596	0.00419929	0	0
Otu1866	D_0__Bacteria; D_1__Proteobacteria; D_2__Epsilonproteobacteria; D_3__Campylobacterales; D_4__Helicobacteraceae; D_5__Helicobacter; Ambiguous_taxa	0.00508862	0.000296865	0.000323022	0.00412823	0.000340501
Otu3482	Unassigned	0.00508673	0.00207806	0.00129209	0.00137608	0.000340501
Otu4398	D_0__Bacteria; D_1__Bacteroidetes; D_2__Flavobacteriia; D_3__Flavobacteriales; D_4__Flavobacteriaceae	0.00508591	0.000296865	0.00419929	0.000589748	0
[truncated: 865 more rows]
